# Supplementary material for: DFT calculations reveal the origin of controllable synthesis of β-boronyl carbonyl compounds from Cu/Pd-cocatalyzed four-component borocarbonylation of vinylarenes
Source: Royal Society of Chemistry journal article supplement (doi:10.1039/d2cy01936a), 2023-01-01
Supplement: d2cy01936a1.pdf [file d2cy01936a1.pdf]

## Supplementary Information

DFT calculations reveal origin of controllable synthesis of  $\beta$ -boronyl carbonyl compounds from Cu/Pd-cocatalyzed four-component borocarbonylation of vinylarenes

Lin Liu, Yanhong Liu, Yiyang Yang, Chengbu Liu, Dongju Zhang\*

Key Lab of Colloid and Interface Chemistry, Ministry of Education, Institute of Theoretical Chemistry,  
School of Chemistry and Chemical Engineering, Shandong University, Jinan 250100, P. R. China

Corresponding author:

E-mail: zhangdj@sdu.edu.cn

Tel: +86-0531-88365833

Fax: +86-0531-88564464

## Table of Content

|                                                                                                                                           |    |
|-------------------------------------------------------------------------------------------------------------------------------------------|----|
| I. Geometrical optimization calculations including the solvation effect.....                                                              | 3  |
| II. Olefine insertion into Cu–B bond via 1,2-insertion mode. ....                                                                         | 4  |
| III. Reaction of CO insertion into the Cu–B bond. ....                                                                                    | 4  |
| IV. Calculated results using the real IMes ligand for formations of alkylcopper and vinyl alkoxide copper intermediates. ....             | 5  |
| V. Formations of alkyl palladium intermediates and vinyl alkoxide palladium intermediates. ....                                           | 6  |
| VI. Structural analysis of intermediates <b>6<sub>a</sub></b> / <b>7<sub>a</sub></b> and <b>6<sub>b</sub></b> / <b>7<sub>b</sub></b> .... | 7  |
| VII. Coupling reaction between intermediates <b>4</b> and <b>6<sub>a</sub></b> . ....                                                     | 7  |
| VIII. Coupling reaction between intermediates <b>5</b> and <b>7<sub>a</sub></b> . ....                                                    | 9  |
| IV. Coupling reaction between intermediates <b>4</b> and <b>6<sub>b</sub></b> .....                                                       | 9  |
| X. Oxidative addition of intermediate <b>3</b> , <b>4</b> , or <b>5</b> with aryl iodide. ....                                            | 10 |
| XI. Oxidative addition of intermediate <b>3</b> , <b>4</b> , or <b>5</b> with aryl triflates. ....                                        | 11 |
| XII. Calculated data. ....                                                                                                                | 12 |
| XIII. Cartesian coordinates of all the structures.....                                                                                    | 18 |

## I. Geometrical optimization calculations including the solvation effect.

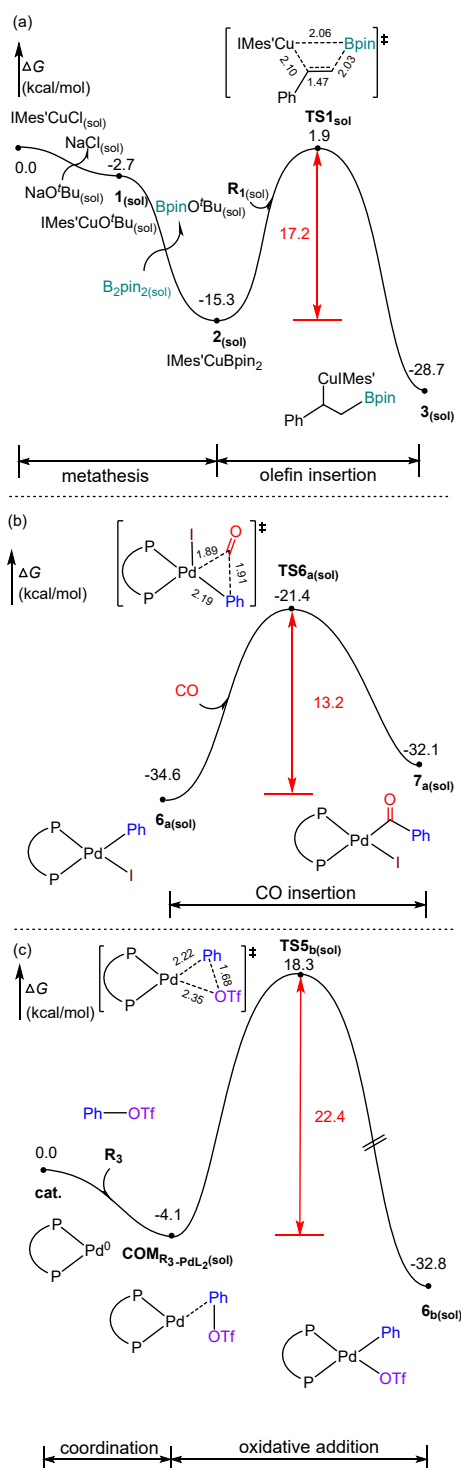

**Fig. S1** Calculated Gibbs free energy profiles for the formations of the alkyl copper intermediate **3**, acyl palladium intermediate **7a**, and aryl palladium complex **6b** by performing geometrical optimization calculations including the solvation effect followed by the single-point energy calculations. Bond distances are in Å. The solvent used in the PCM solvation model is toluene.

## II. Olefine insertion into Cu–B bond via 1,2-insertion mode.

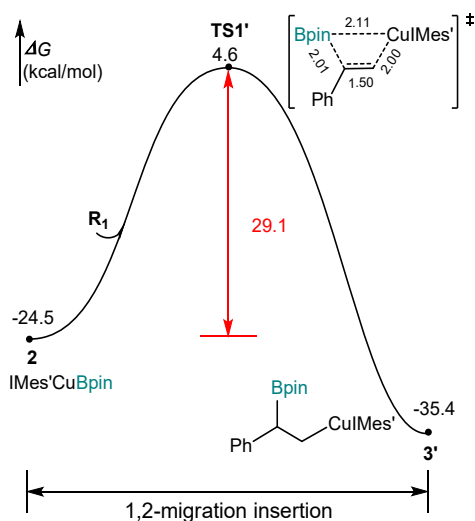

**Fig. S2** Calculated Gibbs energy profile for the 1,2-insertion mode of the asymmetric olefin  $R_1$ . Bond distances are given in Å.

## III. Reaction of CO insertion into the Cu–B bond.

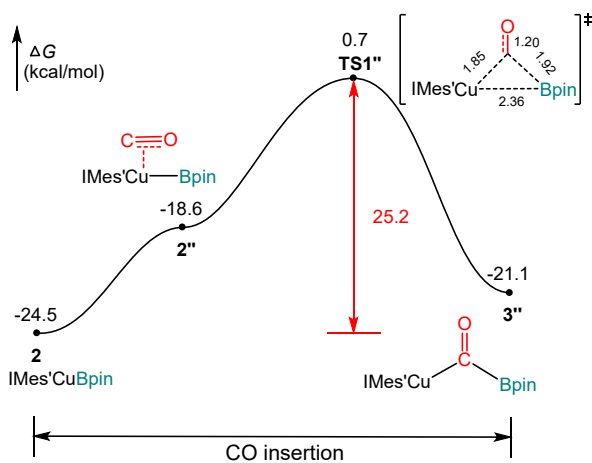

**Fig. S3** Calculated Gibbs energy profile for the reaction of CO insertion into the Cu–B bond of the copper-boryl complex IMes'CuBpin **2**. Bond distances are in Å.

IV. Calculated results using the real IMes ligand for formations of alkylcopper and vinyl alkoxide copper intermediates.

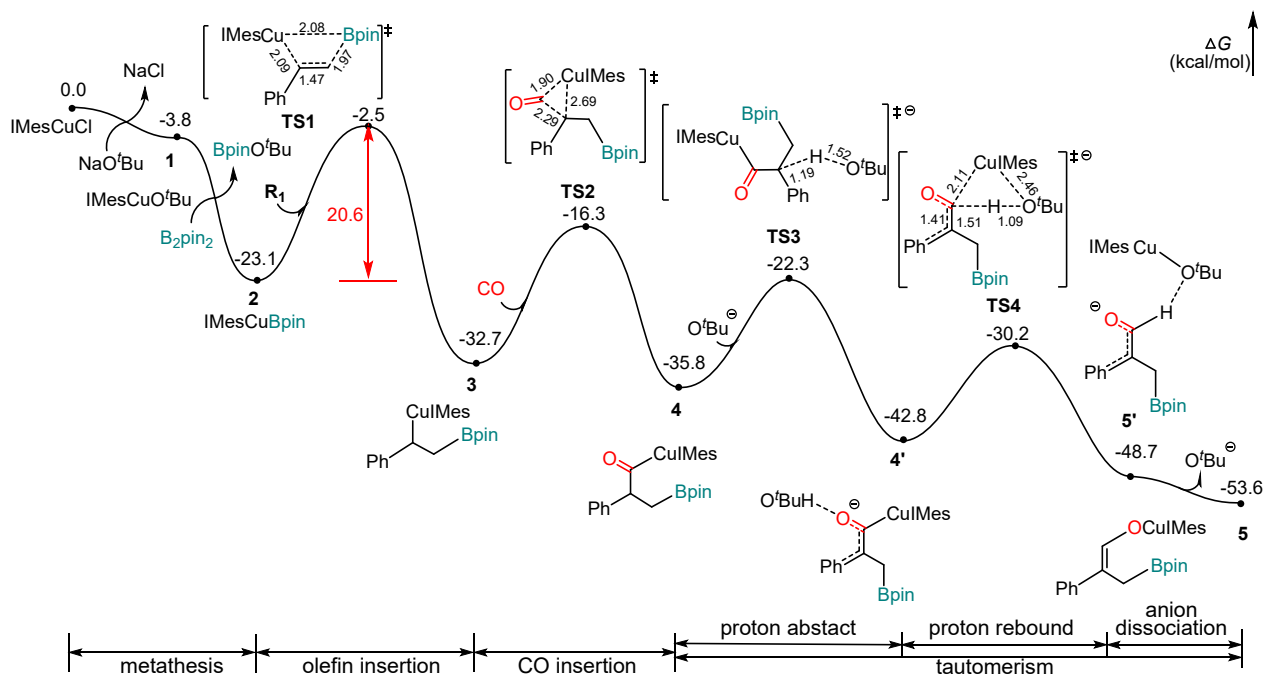

**Fig. S4** Gibbs energy profile calculated using the real IMes ligand for formations of copper alkyl intermediate

**3A** and the copper vinyl alkoxide intermediate **5A**. Bond distances are in Å.

## V. Formations of alkyl palladium intermediates and vinyl alkoxide palladium intermediates.

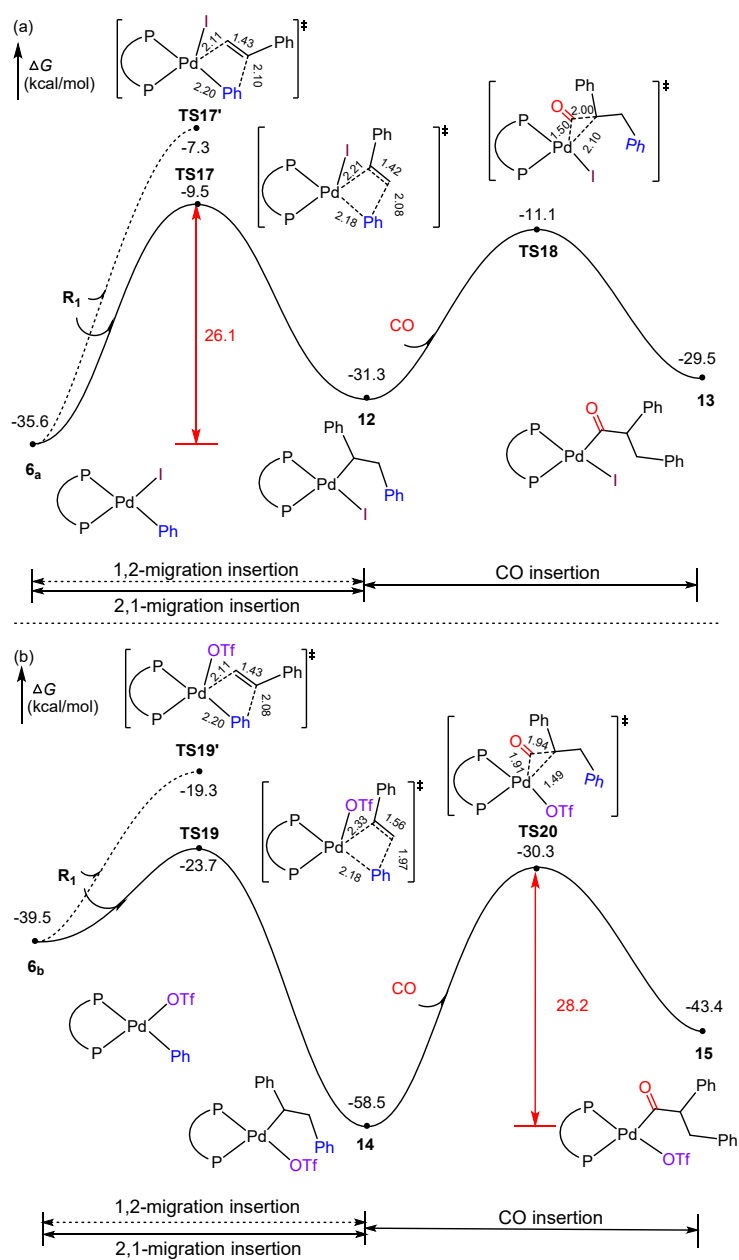

**Fig. S5** Calculated Gibbs energy profiles for formations of the alkyl palladium intermediates **12** and **14** and vinyl alkoxide palladium intermediates **13** and **15**. Bond distances are in Å.

## VI. Structural analysis of intermediates **6<sub>a</sub>**/**7<sub>a</sub>** and **6<sub>b</sub>**/**7<sub>b</sub>**

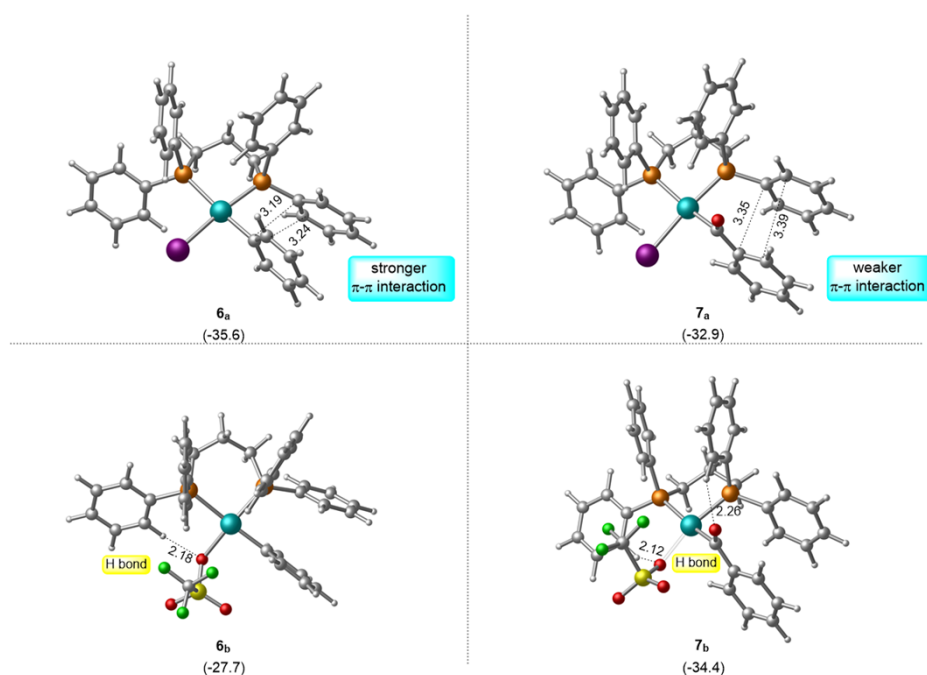

**Fig. S6** Visualization of non-covalent interactions between molecules of intermediates **6<sub>a</sub>**, **7<sub>a</sub>** and **6<sub>b</sub>**, **7<sub>b</sub>** with corresponding Gibbs free energy in parentheses.

## VII. Coupling reaction between intermediates **4** and **6<sub>a</sub>**.

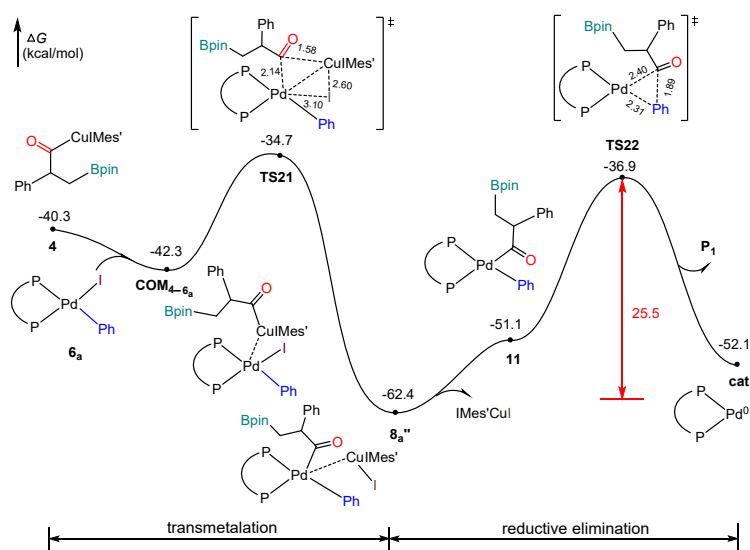

**Fig. S7** Calculated Gibbs energy profile for the coupling between **4** and **6<sub>a</sub>** to produce the  $\beta$ -boryl ketone **P<sub>1</sub>**.

Bond distances are given in Å.

### VIII. Coupling reaction between intermediates **5** and **7<sub>a</sub>**.

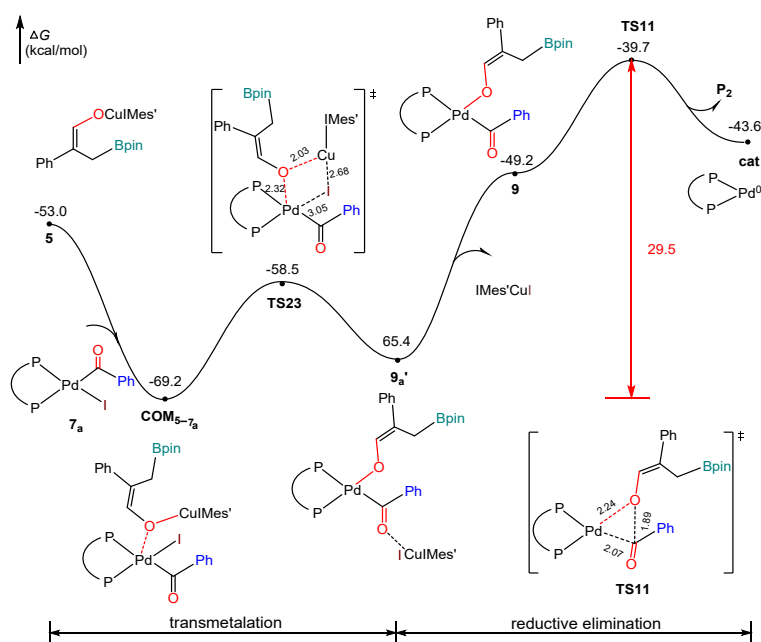

**Fig. S8** Calculated Gibbs energy profile for the coupling between intermediates **5** and **7<sub>a</sub>** to form the  $\beta$ -boryl ketone **P<sub>2</sub>**. Bond distances are given in Å.

### IV. Coupling reaction between intermediates **4** and **6<sub>b</sub>**.

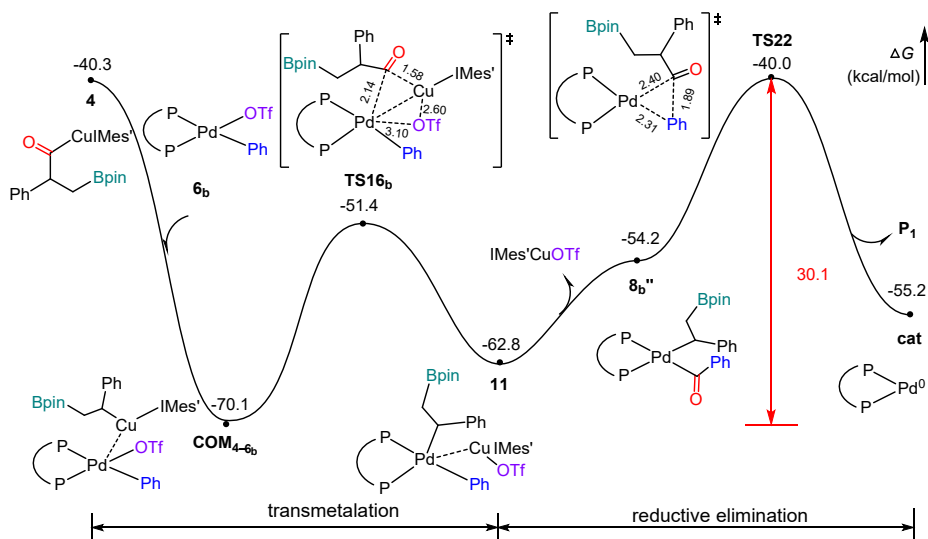

**Fig. S9** Calculated Gibbs energy profile for coupling between intermediates **4** and **6<sub>b</sub>** to form the  $\beta$ -boryl ketone **P<sub>1</sub>**. Bond distances are given in Å.



X. Oxidative addition of intermediate **3**, **4**, or **5** with aryl iodide.

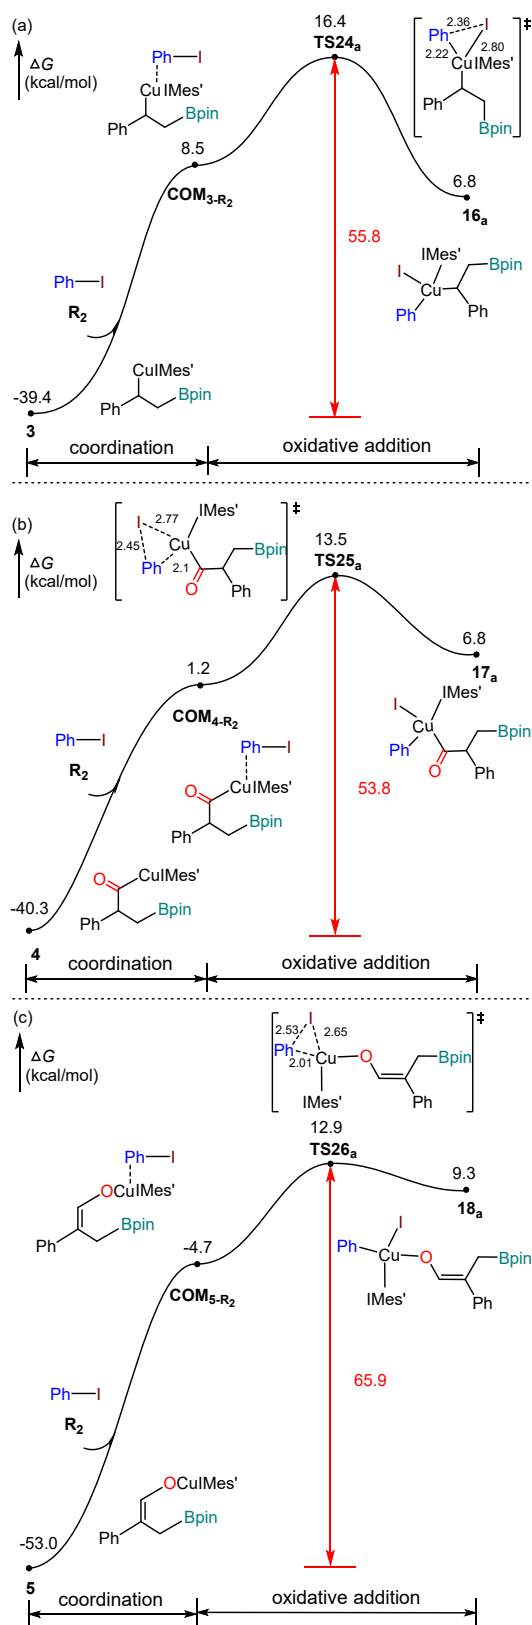

**Fig. S10** Calculated Gibbs energy profile for the oxidative addition between intermediate **3**, **4**, or **5** and aryl iodide. Bond distances are given in Å.

XI. Oxidative addition of intermediate **3**, **4**, or **5** with aryl triflates.

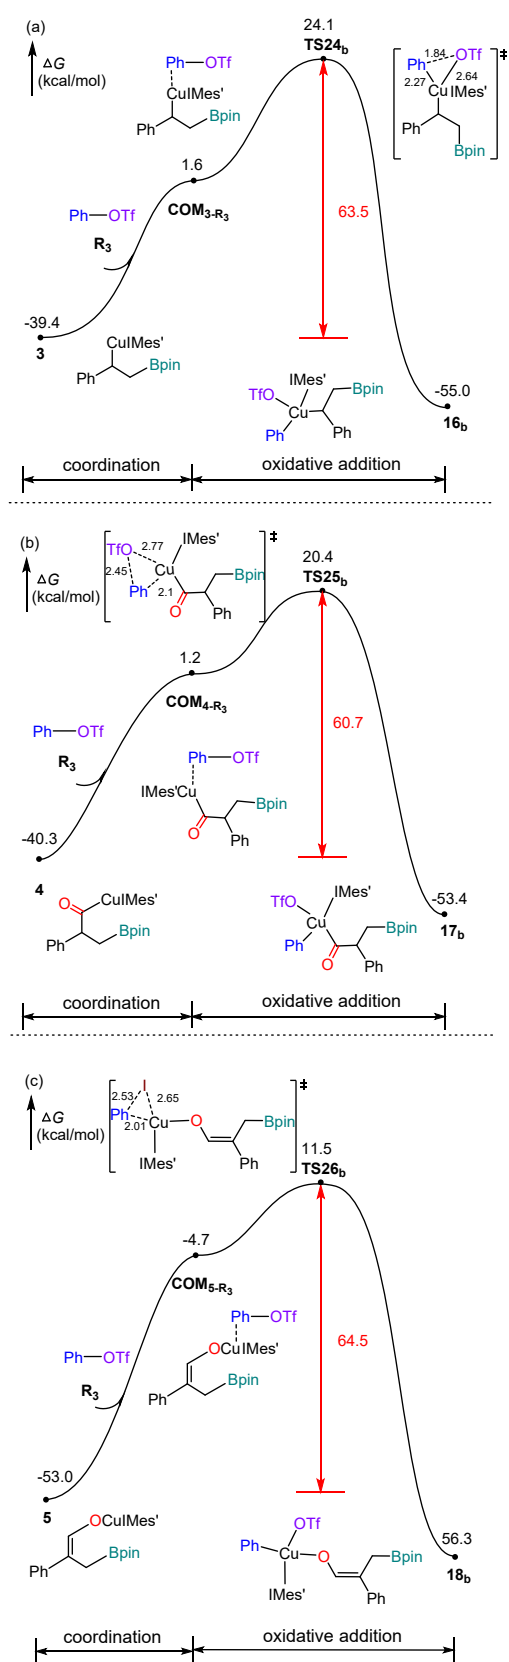

**Fig. S11** Calculated Gibbs energy profile for oxidative addition between intermediates **3,4,5** and aryl triflates. Bond distances are given in Å.

## XII. Calculated data.

**Table S1.** Calculated Energies and Imaginary Frequencies

| Stationary point                            | Thermal correction to Gibbs free energy at B3LYP-D3/LanL2DZ /6-31G(d,p) (in a.u.) (1) | Single-point energy at B3LYP-D3/LANL2D /6-311+G(d,p) (in a.u.) (2) | Gibbs free energies (G) (in a.u.) (3)=(1)+(2) | Imaginary frequencies (cm <sup>-1</sup> ) |
|---------------------------------------------|---------------------------------------------------------------------------------------|--------------------------------------------------------------------|-----------------------------------------------|-------------------------------------------|
| IMes'CuCl                                   | 0.082398                                                                              | -961.430538                                                        | -961.34814                                    |                                           |
| NaO'Bu                                      | 0.082177                                                                              | -395.5068407                                                       | -395.4246637                                  |                                           |
| NaCl                                        | -0.026459                                                                             | -622.635064                                                        | -622.661523                                   |                                           |
| <b>1</b>                                    | 0.196144                                                                              | -734.314553                                                        | -734.118409                                   |                                           |
| B <sub>2</sub> pin <sub>2</sub>             | 0.318296                                                                              | -822.857296                                                        | -822.539                                      |                                           |
| BpinO'Bu                                    | 0.257098                                                                              | -644.651749                                                        | -644.394651                                   |                                           |
| <b>2</b>                                    | 0.246104                                                                              | -912.540661                                                        | -912.294557                                   |                                           |
| <b>R<sub>1</sub></b>                        | 0.094548                                                                              | -309.759997                                                        | -309.665449                                   |                                           |
| <b>TS1</b>                                  | 0.37081                                                                               | -1222.299319                                                       | -1221.928509                                  | -226.03                                   |
| <b>3</b>                                    | 0.373791                                                                              | -1222.357725                                                       | -1221.983934                                  |                                           |
| CO                                          | -0.014101                                                                             | -113.3499087                                                       | -113.3640097                                  |                                           |
| <b>TS2</b>                                  | 0.377886                                                                              | -1335.700486                                                       | -1335.3226                                    | -189.90                                   |
| <b>4</b>                                    | 0.380549                                                                              | -1335.729917                                                       | -1335.349368                                  |                                           |
| <b>TS3</b>                                  | 0.485002                                                                              | -1568.93866                                                        | -1568.43285                                   | -1474.70                                  |
| <b>4'</b>                                   | 0.491183                                                                              | -1568.97467                                                        | -1568.4629                                    |                                           |
| <b>TS4</b>                                  | 0.493610                                                                              | -1568.93607                                                        | -1568.42699                                   | -984.64                                   |
| <b>5'</b>                                   | 0.493610                                                                              | -1569.01451                                                        | -1568.5004                                    |                                           |
| <b>5</b>                                    | 0.379578                                                                              | -1335.78097                                                        | -1335.38377                                   |                                           |
| <sup>t</sup> BuO <sup>-</sup>               | 0.091141                                                                              | -233.215348                                                        | -233.124207                                   |                                           |
| <b>Cat.</b>                                 | 0.373858                                                                              | -1854.51632                                                        | -1854.12471                                   |                                           |
| <b>R<sub>2</sub></b>                        | 0.051187                                                                              | -243.118117                                                        | -243.05962                                    |                                           |
| <b>COM<sub>R<sub>2</sub>-Pd(dppp)</sub></b> | 0.449203                                                                              | -2097.667851                                                       | -2097.218648                                  |                                           |

|                                             |          |              |              |         |
|---------------------------------------------|----------|--------------|--------------|---------|
| <b>TS5<sub>a</sub></b>                      | 0.452276 | -2097.665252 | -2097.212976 | -69.88  |
| <b>6<sub>a</sub></b>                        | 0.455362 | -2097.721417 | -2097.266055 |         |
| <b>TS6<sub>a</sub></b>                      | 0.457625 | -2211.068515 | -2210.61089  | -319.14 |
| <b>7<sub>a</sub></b>                        | 0.461241 | -2211.093734 | -2210.632493 |         |
| <b>R<sub>3</sub></b>                        | 0.079395 | -1193.35328  | -1193.27389  |         |
| <b>COM<sub>R<sub>3</sub>-Pd(dppp)</sub></b> | 0.473564 | -3047.903655 | -3047.430091 |         |
| <b>TS5<sub>b</sub></b>                      | 0.470717 | -3047.866983 | -3047.396266 | -409.82 |
| <b>6<sub>b</sub></b>                        | 0.472806 | -3047.846127 | -3047.373321 |         |
| <b>TS6<sub>b</sub></b>                      | 0.501499 | -3161.319327 | -3160.817828 | -409.82 |
| <b>7<sub>b</sub></b>                        | 0.500876 | -3161.335983 | -3160.835107 |         |
| <b>COM<sub>3-7a</sub></b>                   | 0.867986 | -3433.50761  | -3432.639624 |         |
| <b>TS7</b>                                  | 0.872791 | -3433.477517 | -3432.604726 | -29.36  |
| <b>8'</b>                                   | 0.873862 | -3433.486208 | -3432.612346 |         |
| <b>8</b>                                    | 0.75801  | -2920.887669 | -2920.129659 |         |
| <b>TS8</b>                                  | 0.757728 | -2920.86293  | -2920.105204 | -230.93 |
| <b>P<sub>1</sub></b>                        | 0.367388 | -1066.338402 | -1065.971014 |         |
| <b>COM<sub>3-6a</sub></b>                   | 0.858583 | -3320.11945  | -3319.26087  |         |
| <b>TS7'</b>                                 | 0.863057 | -3320.089453 | -3319.226396 | -56.84  |
| <b>10'</b>                                  | 0.859287 | -3320.096845 | -3319.237558 |         |
| <b>10</b>                                   | 0.751403 | -2807.49961  | -2806.748207 |         |
| <b>TS8'</b>                                 | 0.749241 | -2807.463098 | -2806.713857 | -19.87  |
| <b>P<sub>3</sub></b>                        | 0.359434 | -952.96955   | -952.610116  |         |
| <b>COM<sub>3-7b</sub></b>                   | 0.921844 | -4383.739454 | -4382.81761  |         |
| <b>TS9</b>                                  | 0.892314 | -4383.734329 | -4382.842015 | -15.63  |
| <b>8''</b>                                  | 0.942142 | -4383.768455 | -4382.826313 |         |
| <b>COM<sub>5-7b</sub></b>                   | 0.75801  | -2920.887669 | -2920.129659 |         |
| <b>TS10</b>                                 | 0.757728 | -2920.862932 | -2920.105204 | -24.30  |
| <b>9'</b>                                   | 0.893188 | -4497.149145 | -4496.255957 |         |
| <b>9</b>                                    | 0.76429  | -3034.255516 | -3033.491226 |         |
| <b>TS11</b>                                 | 0.765643 | -3034.241782 | -3033.476139 | -109.06 |
| <b>P<sub>2</sub></b>                        | 0.374273 | -1179.701116 | -1179.326843 |         |

|                                             |          |              |              |         |
|---------------------------------------------|----------|--------------|--------------|---------|
| <b>COM<sub>4-R<sub>2</sub></sub></b>        | 0.460778 | -1578.86712  | -1578.38602  |         |
| <b>TS12</b>                                 | 0.454877 | -1578.83373  | -1578.35771  | -172.52 |
| <b>CuI</b>                                  | 0.089275 | -512.593975  | -512.5047    |         |
| <b>CuOTf</b>                                | 0.095715 | -1462.834607 | -1462.72582  |         |
| <b>TS13</b>                                 | 0.464656 | -1692.23315  | -1692.23315  | -351.18 |
| <b>12</b>                                   | 0.462451 | -1692.31403  | -1691.82906  |         |
| <b>TS14</b>                                 | 0.383367 | -1449.02013  | -1448.61945  | -511.49 |
| <b>COM<sub>3-R<sub>2</sub></sub></b>        | 0.446605 | -1465.49225  | -1465.0248   |         |
| <b>TS15</b>                                 | 0.447735 | -1465.465598 | -1464.99748  | -141.67 |
| <b>TS5<sub>c</sub></b>                      | 0.472501 | -4660.42414  | -4659.95164  | -144.71 |
| <b>6<sub>c</sub></b>                        | 0.474866 | -4660.47017  | -4659.99531  |         |
| <b>TS6<sub>c</sub></b>                      | 0.481198 | -4773.82391  | -4773.34271  | -311.01 |
| <b>7<sub>c</sub></b>                        | 0.481197 | -4773.8239   | -4773.34271  |         |
| <b>R<sub>4</sub></b>                        | 0.05289  | -691.958284  | -2805.878882 |         |
| <b>COM<sub>R<sub>4</sub>-Pd(dppp)</sub></b> | 0.451232 | -4660.470174 | -4660.018942 |         |
| <b>TS5<sub>c</sub></b>                      | 0.452186 | -4660.424143 | -4659.971957 | -234.81 |
| <b>6<sub>c</sub></b>                        | 0.452186 | -4660.470174 | -4660.017988 |         |
| <b>TS6<sub>c</sub></b>                      | 0.481198 | -4773.823907 | -4773.342709 | -302.42 |
| <b>7<sub>c</sub></b>                        | 0.458917 | -4773.839715 | -4773.380798 |         |
| <b>R<sub>5</sub></b>                        | 0.054554 | -691.805652  | -691.958285  |         |
| <b>COM<sub>R<sub>5</sub>-Pd(dppp)</sub></b> | 0.453332 | -2546.502707 | -2546.049375 |         |
| <b>TS5<sub>d</sub></b>                      | 0.453947 | -2546.480671 | -2546.026724 | -234.81 |
| <b>6<sub>d</sub></b>                        | 0.461005 | -2659.915156 | -2659.454151 |         |
| <b>TS6<sub>d</sub></b>                      | 0.459835 | -2659.896342 | -2659.436507 | -302.42 |
| <b>7<sub>d</sub></b>                        | 0.461178 | -2659.910916 | -2659.449738 |         |
| <b>TS1'</b>                                 | 0.369770 | -1221.653953 | -1222.319747 | -248.37 |
| <b>3'</b>                                   | 0.371260 | -1221.717624 | -1920.623635 |         |
| <b>2''</b>                                  | 0.262716 | -1025.89691  | -1222.348777 |         |
| <b>TS1''</b>                                | 0.621406 | -1954.264553 | -1955.314501 | -355.59 |
| <b>3''</b>                                  | 0.626443 | -1025.9049   | -1025.63856  |         |
| <b>1A</b>                                   | 0.319552 | -1353.93082  | -1353.47415  |         |
| <b>2A</b>                                   | 0.492733 | -1531.334095 | -1532.153395 |         |

|                                      |          |              |                   |          |
|--------------------------------------|----------|--------------|-------------------|----------|
| <b>TS1A</b>                          | 0.669147 | -1919.480342 | -1919.86578       | -292.95  |
| <b>3A</b>                            | 0.669212 | -1919.542901 | -1919.92934       |          |
| <b>TS2A</b>                          | 0.621406 | -1954.264553 | -1954.66852       | -139.13  |
| <b>4A</b>                            | 0.650695 | -1955.34296  | -1954.69227       |          |
| <b>TS3A</b>                          | 0.760703 | -2188.56165  | -2187.80094       | -1359.97 |
| <b>4A'</b>                           | 0.766585 | -2188.58364  | -2187.81706       |          |
| <b>TS4A</b>                          | 0.679917 | -2188.6363   | -2187.95638       | -1208.23 |
| <b>5A'</b>                           | 0.766182 | -2188.6247   | -2187.85849       |          |
| <b>5A</b>                            | 0.64719  | -1955.396    | -1954.74879       |          |
| <b>TS21</b>                          | 0.872476 | -3433.47886  | -3432.57344       | -46.84   |
| <b>8<sub>a</sub>''</b>               | 0.865591 | -3433.51612  | -3432.61645       |          |
| <b>11</b>                            | 0.75801  | -2920.881089 | -<br>2,920.097676 |          |
| <b>TS22</b>                          | 0.757728 | -2920.86293  | -2920.07735       | -230.93  |
| <b>COM<sub>5-7a</sub></b>            | 0.876729 | -3546.90464  | -3545.99368       |          |
| <b>TS23</b>                          | 0.874777 | -3546.88552  | -3545.97651       | -21.57   |
| <b>9<sub>a</sub>'</b>                | 0.873511 | -1692.31403  | -1691.82906       |          |
| <b>COM<sub>4-6b</sub></b>            | 0.889662 | -4383.74348  | -4382.81774       |          |
| <b>TS10<sub>b</sub></b>              | 0.890496 | -4383.73676  | -4382.81051       | -28.12   |
| <b>8<sub>b</sub>''</b>               | 0.887513 | -4383.73614  | -4382.81225       |          |
| <b>TS17</b>                          | 0.580535 | -2406.431275 | -2407.470567      | -314.58  |
| <b>TS17'</b>                         | 0.585271 | -2406.439311 | -2407.481325      | -295.38  |
| <b>12</b>                            | 0.582755 | -2406.468467 | -2407.507441      |          |
| <b>TS18</b>                          | 0.586024 | -2519.761425 | -2520.842628      | -328.42  |
| <b>13</b>                            | 0.584467 | -2519.789172 | -2520.870378      |          |
| <b>14</b>                            | 0.606873 | -3469.659696 | -3471.12505       |          |
| <b>TS20</b>                          | 0.6042   | -3469.775502 | -3471.098257      | -305.49  |
| <b>15</b>                            | 0.608982 | -3469.799824 | -3471.124         |          |
| <b>COM<sub>3-R<sub>2</sub></sub></b> | 0.449905 | -1464.73107  | -1465.49301       |          |
| <b>TS24<sub>a</sub></b>              | 0.451223 | -1464.70186  | -1465.46521       | -180.25  |
| <b>16<sub>a</sub></b>                | 0.455134 | -1464.730624 | -1465.500311      |          |
| <b>COM<sub>4-R<sub>2</sub></sub></b> | 0.455733 | -1578.061038 | -1578.866702      |          |
| <b>TS25<sub>a</sub></b>              | 0.458724 | -1578.030114 | -1578.838118      | -147.52  |

|                                                             |           |              |              |         |
|-------------------------------------------------------------|-----------|--------------|--------------|---------|
| <b>17<sub>a</sub></b>                                       | 0.460243  | -1578.154304 | -1578.962591 |         |
| <b>COM<sub>5-R<sub>2</sub></sub></b>                        | 0.459513  | -1578.092742 | -1578.899238 |         |
| <b>TS26<sub>a</sub></b>                                     | 0.459408  | -1578.049999 | -1578.857564 | -97.87  |
| <b>18<sub>a</sub></b>                                       | 0.459543  | -1578.052835 | -1578.861125 |         |
| <b>COM<sub>3-R<sub>3</sub></sub></b>                        | 0.468966  | -2414.733700 | -2415.730626 |         |
| <b>TS24<sub>b</sub></b>                                     | 0.470248  | -2414.689457 | -2415.688898 | -343.15 |
| <b>16<sub>b</sub></b>                                       | 0.473256  | -2414.820049 | -2415.825068 |         |
| <b>COM<sub>4-R<sub>3</sub></sub></b>                        | 0.476522  | -2528.062133 | -2529.103467 |         |
| <b>TS25<sub>b</sub></b>                                     | 0.477277  | -2528.018141 | -2529.062661 | -268.57 |
| <b>17<sub>b</sub></b>                                       | 0.478451  | -2528.145948 | -2529.193347 |         |
| <b>COM<sub>5-R<sub>3</sub></sub></b>                        | 0.479198  | -2528.098428 | -2529.138996 |         |
| <b>TS26<sub>b</sub></b>                                     | 0.475980  | -2528.030043 | -2529.072403 | -210.91 |
| <b>18<sub>b</sub></b>                                       | 0.479005  | -2528.052650 | -2529.102008 |         |
| <b>IMes'<sup>+</sup>CuCl<sub>sol</sub></b>                  | 0.091968  | -961.217     | -961.430538  |         |
| <b>NaO<sup>+</sup>Bu<sub>sol</sub></b>                      | 0.091466  | -395.3399    | -395.507966  |         |
| <b>NaCl<sub>sol</sub></b>                                   | -0.021897 | -622.613     | -622.636301  |         |
| <b>B<sub>2</sub>pin<sub>2sol</sub></b>                      | 0.102445  | -507.933     | -508.182186  |         |
| <b>BpinO<sup>+</sup>Bu<sub>sol</sub></b>                    | 0.268198  | -644.2201    | -644.651817  |         |
| <b>R<sub>1(sol)</sub></b>                                   | 0.102146  | -309.5809    | -309.759985  |         |
| <b>1<sub>(sol)</sub></b>                                    | 0.268198  | -644.2201    | -644.651817  |         |
| <b>2<sub>(sol)</sub></b>                                    | 0.385234  | -1221.674    | -1222.31347  |         |
| <b>TS1<sub>(sol)</sub></b>                                  | 0.388284  | -1221.658    | -1222.29958  | -201.99 |
| <b>3<sub>(sol)</sub></b>                                    | 0.388702  | -1221.717    | -1222.35818  |         |
| <b>6a<sub>(sol)</sub></b>                                   | 0.483559  | -2210.213    | -2211.08717  |         |
| <b>TS6<sub>a(sol)</sub></b>                                 | 0.47866   | -2210.201    | -2211.06873  | -322.57 |
| <b>7<sub>a(sol)</sub></b>                                   | 0.48234   | -2210.234    | -2211.10544  |         |
| <b>COM<sub>R<sub>3</sub>-Pd(dppp)<sub>(sol)</sub></sub></b> | 0.494904  | -3046.843    | -3047.90331  |         |
| <b>TS6<sub>b(sol)</sub></b>                                 | 0.494371  | -3046.804    | -3047.86701  | -412.33 |
| <b>7<sub>b(sol)</sub></b>                                   | 0.497415  | -3046.881    | -3047.95323  |         |

XIII. Cartesian coordinates of all the structures.

IMes'CuCl

|    |             |             |             |
|----|-------------|-------------|-------------|
| C  | 2.92797600  | 0.67944500  | 0.00020100  |
| C  | 2.92803100  | -0.67929900 | 0.00024300  |
| N  | 1.59968800  | -1.07375100 | 0.00008000  |
| N  | 1.59960100  | 1.07378900  | 0.00006700  |
| C  | 0.76355100  | -0.00001600 | 0.00009700  |
| C  | 1.14837700  | 2.46003700  | -0.00019300 |
| H  | 1.51074700  | 2.97561800  | -0.89322100 |
| H  | 0.05850700  | 2.46206500  | 0.00025700  |
| H  | 1.51149500  | 2.97614900  | 0.89222100  |
| C  | 1.14856800  | -2.46003300 | 0.00013400  |
| H  | 0.05869900  | -2.46214000 | -0.00063900 |
| H  | 1.51199200  | -2.97608400 | -0.89219100 |
| H  | 1.51071100  | -2.97562100 | 0.89325000  |
| Cu | -1.15603400 | -0.00003700 | -0.00004200 |
| Cl | -3.29502600 | -0.00001200 | -0.00017200 |
| H  | 3.74206200  | 1.38667400  | 0.00022200  |
| H  | 3.74217400  | -1.38646300 | 0.00032600  |

NaO'Bu

|    |             |             |             |
|----|-------------|-------------|-------------|
| Na | 2.69158800  | 0.00110800  | 0.00136000  |
| O  | 0.75860900  | 0.00699500  | 0.00819400  |
| C  | -0.61842500 | 0.00023300  | 0.00028600  |
| C  | -1.15504500 | 1.33926800  | 0.55557100  |
| H  | -0.78173800 | 2.16604900  | -0.05912800 |
| H  | -2.25123800 | 1.38599400  | 0.57104500  |
| H  | -0.78772600 | 1.48527300  | 1.57753300  |
| C  | -1.14473500 | -1.15682900 | 0.87975800  |
| H  | -2.24049500 | -1.20692800 | 0.90801700  |
| H  | -0.76429700 | -2.11033700 | 0.49646700  |
| H  | -0.77716800 | -1.03384600 | 1.90470900  |
| C  | -1.13597300 | -0.18955700 | -1.44374800 |
| H  | -0.76206800 | 0.62350000  | -2.07608000 |
| H  | -0.75511200 | -1.13442700 | -1.84738100 |
| H  | -2.23143200 | -0.20211900 | -1.50690100 |

NaCl

|    |            |            |             |
|----|------------|------------|-------------|
| Na | 0.00000000 | 0.00000000 | -1.44229900 |
| Cl | 0.00000000 | 0.00000000 | 0.93325200  |

**1**

|    |             |            |             |
|----|-------------|------------|-------------|
| Cu | -0.22524900 | 0.18998000 | -0.33987400 |
|----|-------------|------------|-------------|



|   |             |             |             |
|---|-------------|-------------|-------------|
| C | 2.27021800  | 2.42027800  | 0.01102900  |
| C | 1.65212500  | 0.01272700  | -0.08071500 |
| N | 2.58170900  | 0.99812500  | 0.06214200  |
| N | 2.37262700  | -1.13819200 | 0.02928700  |
| C | 3.85046300  | 0.47490900  | 0.25723400  |
| C | 3.71794200  | -0.87694700 | 0.23776900  |
| C | 1.79010500  | -2.47090400 | -0.05447100 |
| H | 0.72311900  | -2.35858900 | -0.24791800 |
| H | 1.93347700  | -3.00843900 | 0.88676300  |
| H | 2.25027600  | -3.03451900 | -0.87033700 |
| H | 2.60909800  | 2.91347600  | 0.92581400  |
| H | 1.18848600  | 2.52351000  | -0.07657000 |
| H | 2.75057100  | 2.88595400  | -0.85378400 |
| C | -3.13432600 | 0.84751500  | 1.39474100  |
| H | -3.19689300 | 1.90631100  | 1.12418000  |
| H | -4.00258900 | 0.59317700  | 2.01524700  |
| H | -2.22700000 | 0.70309300  | 1.99335000  |
| C | -3.05288000 | -0.00755000 | 0.11388700  |
| C | -2.92086100 | -1.49489800 | 0.50330400  |
| H | -2.82574500 | -2.10386800 | -0.40191900 |
| H | -2.01747500 | -1.63902400 | 1.10954400  |
| H | -3.78144600 | -1.85732800 | 1.07915400  |
| C | -4.33562200 | 0.18904000  | -0.71691500 |
| H | -4.42760800 | 1.24057900  | -1.00575100 |
| H | -4.27628200 | -0.40797200 | -1.63240400 |
| H | -5.23693500 | -0.10316700 | -0.16502400 |
| O | -1.97555500 | 0.40193200  | -0.67513200 |
| H | 4.44976700  | -1.66059400 | 0.35211000  |
| H | 4.72050300  | 1.09798700  | 0.38978100  |

B<sub>2</sub>pin<sub>2</sub>

|   |             |             |             |
|---|-------------|-------------|-------------|
| B | -0.84861600 | -0.00018300 | 0.00081300  |
| C | -2.99315800 | 0.52942300  | 0.57875400  |
| O | -1.61053200 | 0.49181800  | 1.03336400  |
| C | -2.99278400 | -0.52949900 | -0.57885300 |
| O | -1.60978400 | -0.49209200 | -1.03236100 |
| B | 0.84861500  | -0.00017100 | 0.00084200  |
| O | 1.60966400  | 0.49261600  | -1.03200800 |
| O | 1.61063000  | -0.49279200 | 1.03300300  |
| C | 2.99267200  | 0.52993300  | -0.57854500 |
| C | 2.99324500  | -0.52980000 | 0.57839600  |
| C | -3.90255200 | 0.19890600  | 1.75615600  |
| H | -3.82040300 | 0.98176800  | 2.51488100  |
| H | -4.94744800 | 0.14543600  | 1.43331100  |
| H | -3.62978700 | -0.75045000 | 2.21889000  |
| C | -3.25329300 | 1.95806600  | 0.09103300  |
| H | -4.29648400 | 2.09945300  | -0.20591800 |
| H | -3.02647900 | 2.65409500  | 0.90257400  |

|   |             |             |             |
|---|-------------|-------------|-------------|
| H | -2.61131600 | 2.20595600  | -0.75831200 |
| C | -3.90120300 | -0.19881500 | -1.75695700 |
| H | -3.81859400 | -0.98166500 | -2.51564300 |
| H | -4.94633300 | -0.14519200 | -1.43490100 |
| H | -3.62793700 | 0.75051700  | -2.21944600 |
| C | -3.25352100 | -1.95811100 | -0.09136500 |
| H | -4.29699700 | -2.09937800 | 0.20464600  |
| H | -3.02605200 | -2.65415900 | -0.90270600 |
| H | -2.61234600 | -2.20609200 | 0.75856200  |
| C | 3.25368400  | -1.95807300 | 0.08974400  |
| H | 4.29690900  | -2.09905800 | -0.20725400 |
| H | 3.02696000  | -2.65468600 | 0.90081000  |
| H | 2.61178700  | -2.20552700 | -0.75979200 |
| C | 3.90258900  | -0.19984700 | 1.75599500  |
| H | 3.82063200  | -0.98321000 | 2.51422400  |
| H | 4.94745900  | -0.14595700 | 1.43314100  |
| H | 3.62964200  | 0.74916700  | 2.21931300  |
| C | 3.90112900  | 0.20013600  | -1.75686000 |
| H | 3.81845600  | 0.98347300  | -2.51503800 |
| H | 4.94625700  | 0.14641800  | -1.43481300 |
| H | 3.62797800  | -0.74893500 | -2.21994500 |
| C | 3.25319900  | 1.95826500  | -0.09012500 |
| H | 4.29665500  | 2.09950900  | 0.20594900  |
| H | 3.02558500  | 2.65480400  | -0.90100400 |
| H | 2.61199500  | 2.20558000  | 0.75997500  |

BpinO'Bu

|   |             |             |             |
|---|-------------|-------------|-------------|
| C | 1.58670200  | 0.80787600  | 0.07122000  |
| C | 1.97633800  | -0.70962800 | -0.05929100 |
| O | 0.16234200  | 0.73158000  | 0.34168200  |
| B | -0.27648000 | -0.47301000 | -0.18313200 |
| O | 0.75638100  | -1.29873700 | -0.57126800 |
| C | 2.25966800  | -1.36779000 | 1.29487500  |
| H | 1.46233300  | -1.14876300 | 2.01042600  |
| H | 2.30503700  | -2.45093800 | 1.15710100  |
| H | 3.21010300  | -1.03032100 | 1.71802500  |
| C | 3.10825900  | -0.99983300 | -1.03737400 |
| H | 4.02975800  | -0.49908300 | -0.72323700 |
| H | 3.29932000  | -2.07590300 | -1.06870400 |
| H | 2.85675600  | -0.67208500 | -2.04698300 |
| C | 2.26105900  | 1.55329200  | 1.21597400  |
| H | 1.91260800  | 2.58964700  | 1.23662900  |
| H | 2.02941200  | 1.09863800  | 2.18024000  |
| H | 3.34769200  | 1.56264700  | 1.08364900  |
| C | 1.75143200  | 1.58038000  | -1.24097400 |
| H | 1.27963600  | 1.04733200  | -2.07087800 |
| H | 1.26754100  | 2.55563600  | -1.14217300 |
| H | 2.80540900  | 1.74019000  | -1.48514100 |

|   |             |             |             |
|---|-------------|-------------|-------------|
| O | -1.56379900 | -0.85873700 | -0.32376700 |
| C | -2.71078300 | -0.03718300 | 0.00451100  |
| C | -3.91962700 | -0.90402300 | -0.35032100 |
| H | -3.90139800 | -1.83293400 | 0.22654700  |
| H | -4.85171900 | -0.37437800 | -0.13185200 |
| H | -3.90324500 | -1.16057200 | -1.41328900 |
| C | -2.69607700 | 0.28402700  | 1.50291100  |
| H | -3.59789800 | 0.83795300  | 1.78190400  |
| H | -2.66936100 | -0.64265000 | 2.08433000  |
| H | -1.82303700 | 0.88680600  | 1.76147000  |
| C | -2.69109500 | 1.23919500  | -0.84297300 |
| H | -2.65763400 | 0.98338200  | -1.90645600 |
| H | -3.59421100 | 1.82970200  | -0.66012500 |
| H | -1.81934400 | 1.85001300  | -0.60033800 |

## 2

|    |             |             |             |
|----|-------------|-------------|-------------|
| Cu | -0.83642600 | -0.00012300 | 0.00016200  |
| B  | 1.16616400  | -0.00000700 | 0.00016100  |
| C  | -3.20464800 | -2.42737500 | 0.35853200  |
| O  | 1.97065700  | 0.50636700  | 1.02204800  |
| O  | 1.97043000  | -0.50642100 | -1.02187200 |
| C  | -2.82145200 | -0.00006000 | 0.00001400  |
| N  | -3.66231600 | -1.05958600 | 0.15441400  |
| N  | -3.66198400 | 1.05972400  | -0.15448300 |
| C  | -4.99263900 | -0.67191600 | 0.09804700  |
| C  | -4.99242700 | 0.67240100  | -0.09858600 |
| C  | 3.34461400  | -0.53968700 | -0.56577300 |
| C  | -3.20391400 | 2.42742300  | -0.35829600 |
| H  | -5.80753600 | -1.37085500 | 0.20081300  |
| H  | -5.80710800 | 1.37155600  | -0.20158600 |
| H  | -3.53867900 | 2.80095600  | -1.32997400 |
| H  | -3.58643600 | 3.07796900  | 0.43278300  |
| H  | -2.11410800 | 2.42347100  | -0.32806800 |
| H  | -3.58710700 | -3.07791400 | -0.43258200 |
| H  | -2.11483500 | -2.42369300 | 0.32860900  |
| H  | -3.53978400 | -2.80071900 | 1.33015500  |
| C  | 3.34471900  | 0.53967100  | 0.56564200  |
| C  | 3.60586200  | 1.95799200  | 0.04275600  |
| H  | 3.37455000  | 2.67295000  | 0.83697400  |
| H  | 4.64902600  | 2.09877400  | -0.25791000 |
| H  | 2.96053300  | 2.17900200  | -0.81123600 |
| C  | 4.26595900  | 0.24164100  | 1.74435800  |
| H  | 5.31074300  | 0.18471900  | 1.41905600  |
| H  | 4.18446400  | 1.04116300  | 2.48648300  |
| H  | 3.99976500  | -0.69787700 | 2.23104100  |
| C  | 4.26561000  | -0.24172300 | -1.74470200 |
| H  | 5.31044900  | -0.18466500 | -1.41959700 |
| H  | 4.18406000  | -1.04134500 | -2.48671200 |

|   |            |             |             |
|---|------------|-------------|-------------|
| H | 3.99923800 | 0.69770500  | -2.23145100 |
| C | 3.60588500 | -1.95795800 | -0.04285200 |
| H | 2.96076500 | -2.17889900 | 0.81131700  |
| H | 3.37439800 | -2.67298300 | -0.83695700 |
| H | 4.64912400 | -2.09870000 | 0.25758600  |

**R<sub>1</sub>**

|   |             |             |             |
|---|-------------|-------------|-------------|
| C | -0.40724600 | -1.28237200 | 0.00001000  |
| C | 0.51466200  | -0.22295800 | -0.00012400 |
| C | 0.01276300  | 1.09078500  | -0.00018100 |
| C | -1.35719900 | 1.33038700  | -0.00005800 |
| C | -2.26192700 | 0.26440100  | 0.00010500  |
| C | -1.78062500 | -1.04431000 | 0.00013200  |
| H | -0.03637300 | -2.30408800 | 0.00004000  |
| H | 0.70011100  | 1.93062700  | -0.00037100 |
| H | -1.72375000 | 2.35277000  | -0.00011300 |
| H | -3.33080800 | 0.45501700  | 0.00017900  |
| H | -2.47345100 | -1.88060600 | 0.00024500  |
| C | 1.95223900  | -0.53224500 | -0.00022200 |
| H | 2.18510500  | -1.59653900 | -0.00071600 |
| C | 2.97015900  | 0.33638900  | 0.00028700  |
| H | 2.82406600  | 1.41230800  | 0.00088900  |
| H | 3.99813800  | -0.00995400 | 0.00015100  |

**TS1**

|    |             |             |             |
|----|-------------|-------------|-------------|
| Cu | 0.48654100  | 0.25865700  | -0.84209500 |
| B  | -1.36072300 | -0.55435200 | -0.39794600 |
| C  | 1.37432900  | -1.39475400 | -1.77427000 |
| C  | -1.03658000 | 3.25852000  | -0.90744300 |
| O  | -1.65683600 | -1.17029600 | 0.80687800  |
| O  | -2.50538200 | -0.07013300 | -1.01540500 |
| C  | 0.95764400  | 1.97399900  | -0.16913800 |
| N  | 0.23402000  | 3.12841800  | -0.20840100 |
| N  | 2.06348200  | 2.29380300  | 0.55687100  |
| C  | 0.87849500  | 4.14871900  | 0.47532300  |
| C  | 2.02926300  | 3.61697600  | 0.96624200  |
| C  | -3.03190600 | -0.84426000 | 1.14163400  |
| C  | -3.65575100 | -0.57042300 | -0.26923000 |
| C  | 3.11634000  | 1.33318900  | 0.87981600  |
| H  | 0.47175500  | 5.14452900  | 0.54750400  |
| H  | 2.81366000  | 4.05756400  | 1.56039400  |
| H  | 2.77396800  | 0.62229600  | 1.63419800  |
| H  | 3.98769100  | 1.87542900  | 1.24953700  |
| H  | 3.38393600  | 0.77009800  | -0.01382800 |
| H  | -1.50025300 | 2.27228800  | -0.97380700 |
| H  | -0.88719200 | 3.65493500  | -1.91634600 |
| H  | -1.69058000 | 3.93342400  | -0.35007100 |
| C  | 2.33798800  | -1.74208400 | -0.75690800 |

|   |             |             |             |
|---|-------------|-------------|-------------|
| C | 1.95338500  | -2.04766900 | 0.57879300  |
| C | 2.90730000  | -2.29085300 | 1.56730400  |
| C | 4.27228600  | -2.24938100 | 1.28099900  |
| C | 3.73266200  | -1.73204900 | -1.02922100 |
| C | 4.67039600  | -1.97362200 | -0.03657700 |
| H | 0.90094900  | -2.08745900 | 0.84271500  |
| H | 5.72838900  | -1.95394200 | -0.28782000 |
| H | 1.72580500  | -1.23622300 | -2.78734700 |
| H | 2.57273100  | -2.51904400 | 2.57679300  |
| H | 5.00965500  | -2.44218600 | 2.05389400  |
| H | 4.06158300  | -1.51478000 | -2.04288000 |
| C | -2.98916100 | 0.40344200  | 2.03064300  |
| H | -3.98466600 | 0.68176700  | 2.38905800  |
| H | -2.35336400 | 0.19684900  | 2.89520400  |
| H | -2.55826500 | 1.25096600  | 1.49088100  |
| C | -3.64034300 | -2.01709700 | 1.90038900  |
| H | -3.12667900 | -2.14162100 | 2.85755500  |
| H | -4.70165200 | -1.83934100 | 2.10382800  |
| H | -3.54183600 | -2.94865400 | 1.34113300  |
| C | -4.75248200 | 0.48573300  | -0.29824500 |
| H | -5.10734100 | 0.62166500  | -1.32368100 |
| H | -5.60378000 | 0.17756400  | 0.31782200  |
| H | -4.38981600 | 1.44832500  | 0.06610800  |
| C | -4.11752900 | -1.84604200 | -0.97772900 |
| H | -5.01974600 | -2.26108200 | -0.51881100 |
| H | -4.33687500 | -1.61207700 | -2.02268400 |
| H | -3.33449100 | -2.60866600 | -0.95647800 |
| C | -0.06853500 | -1.57137900 | -1.55188300 |
| H | -0.66064300 | -1.52318000 | -2.46425900 |
| H | -0.35061900 | -2.42664000 | -0.93219300 |

### 3

|    |             |             |             |
|----|-------------|-------------|-------------|
| Cu | 0.66235200  | 0.62695900  | -1.25708000 |
| B  | -1.10478200 | -1.80253500 | -0.91492300 |
| C  | 1.20680700  | -1.18095200 | -1.86627700 |
| C  | -1.48986800 | 3.32416500  | -1.41841600 |
| O  | -1.35199100 | -2.45801000 | 0.27464000  |
| O  | -1.93799300 | -0.70465300 | -1.07158500 |
| C  | 0.34422100  | 2.20322000  | -0.18035300 |
| N  | -0.58502100 | 3.19162500  | -0.28492800 |
| N  | 0.97448100  | 2.46386900  | 0.99883600  |
| C  | -0.53910700 | 4.05075400  | 0.80295900  |
| C  | 0.44552200  | 3.58556200  | 1.61718400  |
| C  | -2.18176400 | -1.59375600 | 1.08885900  |
| C  | -2.90930400 | -0.72553700 | 0.00405900  |
| C  | 2.01098500  | 1.60550800  | 1.57206100  |
| H  | -1.19169100 | 4.90396000  | 0.89786400  |
| H  | 0.80825000  | 3.94989200  | 2.56508500  |

|     |             |             |             |
|-----|-------------|-------------|-------------|
| H   | 2.50777000  | 1.05598300  | 0.77291700  |
| H   | 1.57228600  | 0.88412100  | 2.26548400  |
| H   | 2.74053100  | 2.22397800  | 2.09841300  |
| H   | -1.49774700 | 2.37519000  | -1.95467600 |
| H   | -1.15698400 | 4.12232300  | -2.08801000 |
| H   | -2.49841100 | 3.54535300  | -1.06187800 |
| C   | 2.20964500  | -1.38594100 | -0.79027400 |
| C   | 1.92982400  | -2.04869700 | 0.42767000  |
| C   | 2.86569600  | -2.09844200 | 1.46207000  |
| C   | 4.12363700  | -1.50917900 | 1.32790300  |
| C   | 3.50695900  | -0.82531400 | -0.91538600 |
| C   | 4.43792200  | -0.88140800 | 0.11539800  |
| H   | 0.96390200  | -2.51729900 | 0.57078200  |
| H   | 5.41977800  | -0.43568900 | -0.02671800 |
| H   | 1.71259800  | -1.11859100 | -2.83462300 |
| H   | 2.60639700  | -2.61390900 | 2.38446500  |
| H   | 4.84914300  | -1.55330600 | 2.13458100  |
| H   | 3.76351700  | -0.32046400 | -1.84454100 |
| C   | -1.23288400 | -0.77171900 | 1.96997900  |
| H   | -1.78249800 | -0.13685000 | 2.67138100  |
| H   | -0.59797200 | -1.45439600 | 2.53971500  |
| H   | -0.58230900 | -0.14129600 | 1.35801200  |
| C   | -3.09600700 | -2.45503100 | 1.95094400  |
| H   | -2.49543500 | -3.03314300 | 2.65846800  |
| H   | -3.78967900 | -1.83056500 | 2.52347900  |
| H   | -3.67288900 | -3.15686300 | 1.34661200  |
| C   | -3.20943600 | 0.70761500  | 0.42852800  |
| H   | -3.70040500 | 1.23754400  | -0.39290600 |
| H   | -3.88426500 | 0.72200500  | 1.29059100  |
| H   | -2.29728300 | 1.24543900  | 0.68770900  |
| C   | -4.17203200 | -1.39183800 | -0.54991800 |
| H   | -4.98645400 | -1.38778400 | 0.18041900  |
| H   | -4.49925500 | -0.84471700 | -1.43793300 |
| H   | -3.97011500 | -2.42524700 | -0.84304300 |
| C   | 0.01972100  | -2.17899100 | -1.93378500 |
| H   | -0.40579000 | -2.11225300 | -2.94258600 |
| H   | 0.35114900  | -3.21981700 | -1.79016400 |
| CO  |             |             |             |
| C   | 0.00000000  | 0.00000000  | -0.65011400 |
| O   | 0.00000000  | 0.00000000  | 0.48758500  |
| TS2 |             |             |             |
| Cu  | 0.83813900  | -0.45686400 | 1.12463100  |
| B   | -2.24146000 | 0.46805900  | 0.68774000  |
| C   | -0.41959800 | 1.90426300  | 1.79514900  |
| C   | 3.18469900  | -2.83233400 | 1.21047800  |
| O   | -3.45961500 | 0.26849200  | 0.08992900  |

|   |             |             |             |
|---|-------------|-------------|-------------|
| O | -1.30988700 | -0.47658500 | 0.25965500  |
| C | 2.09364800  | -1.10166700 | -0.21232200 |
| N | 3.00946300  | -2.09747500 | -0.03457600 |
| N | 2.28426100  | -0.70839600 | -1.49860700 |
| C | 3.75209100  | -2.31574300 | -1.18384300 |
| C | 3.29342200  | -1.43313300 | -2.10999200 |
| C | -3.29720800 | -0.73745400 | -0.94539000 |
| C | -2.02894000 | -1.51958300 | -0.45674200 |
| C | 1.55371900  | 0.38461600  | -2.12713100 |
| H | 4.52538700  | -3.06506600 | -1.24176800 |
| H | 3.59357500  | -1.25876700 | -3.13093800 |
| H | 0.72376200  | 0.66566200  | -1.48333500 |
| H | 1.17491500  | 0.06470300  | -3.10131900 |
| H | 2.19409000  | 1.25923900  | -2.24663200 |
| H | 4.21008800  | -2.72139300 | 1.57311900  |
| H | 2.96558100  | -3.89351500 | 1.06163500  |
| H | 2.49309500  | -2.41479700 | 1.94347800  |
| C | 0.17467400  | 2.50645400  | 0.61219300  |
| C | -0.54081500 | 2.72002900  | -0.59701200 |
| C | 0.05079900  | 3.32902100  | -1.70448400 |
| C | 1.38124000  | 3.74873800  | -1.66792400 |
| C | 1.52610700  | 2.95155300  | 0.62150900  |
| C | 2.11035600  | 3.55150500  | -0.48333000 |
| H | -1.59443900 | 2.46482400  | -0.64859800 |
| H | 3.14468200  | 3.88262100  | -0.42504100 |
| H | -0.09580900 | 2.39193300  | 2.71324000  |
| H | -0.54498900 | 3.49353800  | -2.59979000 |
| H | 1.83602000  | 4.23511900  | -2.52548000 |
| H | 2.10457200  | 2.81887800  | 1.53294100  |
| C | -3.06420400 | 0.01649100  | -2.25879200 |
| H | -3.00520600 | -0.66677900 | -3.11085800 |
| H | -3.89960400 | 0.70183500  | -2.42219900 |
| H | -2.14506300 | 0.60706300  | -2.21539900 |
| C | -4.56984300 | -1.57057100 | -1.02350600 |
| H | -5.39938600 | -0.94363000 | -1.36087700 |
| H | -4.45053900 | -2.39166500 | -1.73783400 |
| H | -4.83470900 | -1.98708200 | -0.05062300 |
| C | -1.14144400 | -2.06744700 | -1.56507800 |
| H | -0.26365800 | -2.55146700 | -1.12979500 |
| H | -1.68649900 | -2.80923000 | -2.15732300 |
| H | -0.79774700 | -1.27503700 | -2.22923900 |
| C | -2.34335400 | -2.61258000 | 0.56741900  |
| H | -2.83559900 | -3.47120600 | 0.10238600  |
| H | -1.40626200 | -2.94846600 | 1.02013700  |
| H | -2.98583400 | -2.22987600 | 1.36446400  |
| C | -1.90231600 | 1.57139300  | 1.74317000  |
| H | -2.20751000 | 1.17551000  | 2.72329300  |
| H | -2.55061700 | 2.44824400  | 1.57512200  |

|   |             |            |            |
|---|-------------|------------|------------|
| C | 0.25761500  | 0.03735200 | 2.85240400 |
| O | -0.08562100 | 0.18099900 | 3.96114800 |

4

|    |             |             |             |
|----|-------------|-------------|-------------|
| Cu | 1.17282700  | -0.07292400 | 1.21227300  |
| B  | -2.21163200 | 0.70220300  | 0.52724700  |
| C  | -0.41507200 | 2.44760000  | 1.44166200  |
| C  | 2.66413000  | -3.14551600 | 1.71394400  |
| O  | -3.48890200 | 0.19279800  | 0.47849100  |
| O  | -1.31252500 | -0.09938700 | -0.15326300 |
| C  | 1.99724800  | -1.41632700 | 0.06078400  |
| N  | 2.56279200  | -2.61763800 | 0.36018800  |
| N  | 2.09470700  | -1.33471300 | -1.29346500 |
| C  | 3.00444200  | -3.27176000 | -0.78041100 |
| C  | 2.71066700  | -2.45527500 | -1.82735900 |
| C  | -3.48918100 | -0.91901500 | -0.45238900 |
| C  | -1.98457300 | -1.35739500 | -0.43907300 |
| C  | 1.64369000  | -0.17441800 | -2.05862900 |
| H  | 3.47536000  | -4.24134700 | -0.74947900 |
| H  | 2.88253400  | -2.57334400 | -2.88537400 |
| H  | 0.80471100  | 0.28447000  | -1.53798100 |
| H  | 1.32188200  | -0.50114700 | -3.04941300 |
| H  | 2.44422100  | 0.56050100  | -2.15404100 |
| H  | 3.70861600  | -3.34870200 | 1.96449200  |
| H  | 2.08224000  | -4.06656300 | 1.80945500  |
| H  | 2.26734700  | -2.39356200 | 2.39641200  |
| C  | 0.31216700  | 2.74932000  | 0.15374100  |
| C  | -0.31275900 | 2.83148600  | -1.09766700 |
| C  | 0.41387500  | 3.12130000  | -2.25509800 |
| C  | 1.79230600  | 3.32795100  | -2.18813800 |
| C  | 1.70378000  | 2.95140600  | 0.20062500  |
| C  | 2.43537500  | 3.23997100  | -0.95086400 |
| H  | -1.38417900 | 2.68234900  | -1.17558800 |
| H  | 3.50764500  | 3.40191900  | -0.88131100 |
| H  | -0.36852300 | 3.34098300  | 2.07914400  |
| H  | -0.10153200 | 3.19347800  | -3.20916800 |
| H  | 2.35726000  | 3.56196900  | -3.08603000 |
| H  | 2.20926600  | 2.89552500  | 1.16001200  |
| C  | -3.93654900 | -0.36354600 | -1.80842200 |
| H  | -4.03578100 | -1.15459200 | -2.55728100 |
| H  | -4.90746900 | 0.12321300  | -1.68737600 |
| H  | -3.22664100 | 0.38089700  | -2.17972700 |
| C  | -4.47156800 | -1.97292200 | 0.04287600  |
| H  | -5.48795800 | -1.57132800 | 0.01204400  |
| H  | -4.43789300 | -2.86356400 | -0.59312700 |
| H  | -4.25531800 | -2.26695600 | 1.07089800  |
| C  | -1.46418900 | -1.91272800 | -1.75886700 |
| H  | -0.42122000 | -2.21776000 | -1.64568200 |



|   |             |             |             |
|---|-------------|-------------|-------------|
| H | -2.04341900 | -2.79207800 | -2.05852700 |
| H | -1.52165200 | -1.16922000 | -2.55545500 |
| C | -1.64637100 | -2.31421200 | 0.70831300  |
| H | -2.06622800 | -3.30956600 | 0.53596600  |
| H | -0.55951300 | -2.39696900 | 0.78298900  |
| H | -2.02102500 | -1.93313500 | 1.66143200  |
| C | -1.89044800 | 2.03778600  | 1.28779000  |
| H | -2.30554400 | 1.92616300  | 2.29778500  |
| H | -2.48110400 | 2.84464700  | 0.83123700  |
| C | 0.30123100  | 1.29975800  | 2.27591100  |
| O | 0.15122700  | 1.36323800  | 3.49128400  |

### TS3

|    |             |             |             |
|----|-------------|-------------|-------------|
| Cu | -1.60735600 | -0.66805500 | 0.49036000  |
| B  | 1.90230200  | -1.09136800 | -1.18828900 |
| C  | 0.73246200  | 0.78306900  | -0.20489000 |
| C  | -4.01370800 | -2.48892400 | 2.04856300  |
| O  | 3.26561200  | -0.84926100 | -1.24991900 |
| O  | 1.62801600  | -2.29395700 | -0.56102700 |
| C  | -3.43407400 | -1.19148400 | 0.01952900  |
| N  | -4.31835700 | -1.94604900 | 0.73526600  |
| N  | -4.11848400 | -0.88090400 | -1.11602300 |
| C  | -5.52341400 | -2.09988100 | 0.06541000  |
| C  | -5.39140000 | -1.42726400 | -1.10901700 |
| C  | 3.87408600  | -1.65788500 | -0.21743700 |
| C  | 2.86611300  | -2.86475400 | -0.09826200 |
| C  | -3.54233400 | -0.10282100 | -2.21296200 |
| H  | -2.81055000 | 0.60871900  | -1.79581400 |
| H  | -4.34616400 | 0.44387600  | -2.71324700 |
| H  | -3.05874400 | -0.77186100 | -2.93172400 |
| H  | -4.17058600 | -3.57215300 | 2.05900200  |
| H  | -4.64233000 | -2.02462300 | 2.81523300  |
| H  | -2.96513500 | -2.26835900 | 2.25687700  |
| C  | 1.80641300  | 1.77512800  | 0.00444500  |
| C  | 2.67251500  | 2.20384500  | -1.02939600 |
| C  | 3.60127900  | 3.22627600  | -0.84381000 |
| C  | 3.72114600  | 3.87134800  | 0.38843500  |
| C  | 1.95428500  | 2.44158500  | 1.24933500  |
| C  | 2.88362800  | 3.46105400  | 1.43075400  |
| H  | 2.63242500  | 1.71242300  | -1.99359200 |
| H  | 2.95888600  | 3.93988900  | 2.40594000  |
| H  | 4.24338200  | 3.51660300  | -1.67419600 |
| H  | 4.44813300  | 4.66683900  | 0.53490000  |
| H  | 1.34603300  | 2.11148000  | 2.07988200  |
| C  | 3.93622000  | -0.79386600 | 1.04877900  |
| H  | 4.46536200  | -1.31276900 | 1.85611700  |
| H  | 4.47306100  | 0.12807500  | 0.81138800  |
| H  | 2.94039400  | -0.50869500 | 1.40141600  |

|   |             |             |             |
|---|-------------|-------------|-------------|
| C | 5.28198000  | -2.03734300 | -0.66734900 |
| H | 5.88904400  | -1.13130300 | -0.75175700 |
| H | 5.75937400  | -2.70067200 | 0.06256600  |
| H | 5.27621400  | -2.53342900 | -1.64048200 |
| C | 2.64304900  | -3.36501600 | 1.32733600  |
| H | 1.93767300  | -4.20229600 | 1.31374600  |
| H | 3.57975200  | -3.71347200 | 1.77789100  |
| H | 2.21452200  | -2.57216200 | 1.94196800  |
| C | 3.19959100  | -4.02962900 | -1.03684500 |
| H | 4.09836100  | -4.56868300 | -0.71865200 |
| H | 2.35824100  | -4.72878700 | -1.04142500 |
| H | 3.34893800  | -3.67175300 | -2.05940600 |
| C | 0.78645200  | -0.05962500 | -1.51827000 |
| H | -0.18079100 | -0.56264200 | -1.63974700 |
| H | 0.94175100  | 0.57647700  | -2.39395400 |
| C | 0.18424000  | -0.02948600 | 0.94632700  |
| O | 0.72345500  | -0.02595000 | 2.07417300  |
| C | -2.00476600 | 2.66252000  | 1.40440400  |
| H | -0.98073700 | 2.45489700  | 1.72263900  |
| H | -2.37355500 | 3.53248200  | 1.96459100  |
| H | -2.61506300 | 1.79102600  | 1.66630400  |
| C | -2.06016900 | 2.89765100  | -0.12038400 |
| C | -3.52001400 | 3.16518500  | -0.53323300 |
| H | -3.57923100 | 3.31948000  | -1.61665200 |
| H | -4.14178300 | 2.29920800  | -0.27724200 |
| H | -3.93665000 | 4.04939800  | -0.03274400 |
| C | -1.18704800 | 4.11793600  | -0.48203300 |
| H | -0.14922800 | 3.93398200  | -0.18938000 |
| H | -1.21049400 | 4.27683300  | -1.56576600 |
| H | -1.53073900 | 5.03582100  | 0.01405900  |
| O | -1.61370500 | 1.77128800  | -0.82367200 |
| H | -0.45026100 | 1.44536900  | -0.48621200 |
| H | -6.08304500 | -1.28882200 | -1.92517200 |
| H | -6.35297100 | -2.65395000 | 0.47592100  |

#### TS4

|    |             |             |             |
|----|-------------|-------------|-------------|
| Cu | 1.75298100  | 0.54716500  | -0.00873900 |
| B  | -1.63736100 | -0.14741100 | -1.51407600 |
| C  | 0.09240500  | -1.83396600 | -0.62689200 |
| C  | -0.13632200 | -0.07947300 | 2.47406600  |
| O  | -1.70163200 | 0.61774300  | -0.35976100 |
| O  | -2.74212800 | 0.08190200  | -2.32448400 |
| C  | 0.97184100  | 1.77455900  | 1.23425900  |
| N  | 0.16746800  | 1.33731700  | 2.24409500  |
| N  | 0.86222200  | 3.13618800  | 1.29245700  |
| C  | -0.43151400 | 2.39336500  | 2.90535000  |
| C  | 0.00478100  | 3.53659000  | 2.30929700  |
| C  | -2.79433500 | 1.54423600  | -0.48863300 |

|   |             |             |             |
|---|-------------|-------------|-------------|
| C | -3.70138000 | 0.84437300  | -1.56205900 |
| C | 1.55709800  | 4.02629000  | 0.38236800  |
| H | -1.10458900 | 2.24470500  | 3.73503900  |
| H | -0.20766700 | 4.57281400  | 2.51989500  |
| H | 2.18152700  | 3.40895200  | -0.26478200 |
| H | 2.18673900  | 4.73124200  | 0.93507200  |
| H | 0.84401900  | 4.58517100  | -0.23277200 |
| H | -0.98551600 | -0.37301600 | 1.85602700  |
| H | -0.35961800 | -0.22270500 | 3.53418600  |
| H | 0.72075800  | -0.69081600 | 2.17795500  |
| C | -0.80682500 | -2.69063600 | 0.11099100  |
| C | -2.15995400 | -2.89055600 | -0.29666500 |
| C | -3.06162800 | -3.63902100 | 0.45678400  |
| C | -2.67009200 | -4.24640000 | 1.65244600  |
| C | -0.42585100 | -3.35252200 | 1.31874400  |
| C | -1.33616200 | -4.09402600 | 2.05998000  |
| H | -2.50439400 | -2.46511100 | -1.23364400 |
| H | -0.99931100 | -4.57153100 | 2.97994900  |
| H | -4.08338500 | -3.75570300 | 0.09621100  |
| H | -3.37378200 | -4.83051400 | 2.24081400  |
| H | 0.60477600  | -3.23635500 | 1.63123000  |
| C | -2.19480500 | 2.87209400  | -0.97045900 |
| H | -2.94956000 | 3.66252600  | -1.03874800 |
| H | -1.42639300 | 3.17978200  | -0.25729400 |
| H | -1.72055000 | 2.75059500  | -1.94815600 |
| C | -3.44875000 | 1.73078000  | 0.87710200  |
| H | -2.75068600 | 2.23375900  | 1.55108800  |
| H | -4.35189700 | 2.34628500  | 0.79598800  |
| H | -3.71571000 | 0.76887600  | 1.31751000  |
| C | -4.43356500 | 1.79510600  | -2.50342200 |
| H | -5.02009000 | 1.21804500  | -3.22449800 |
| H | -5.11958900 | 2.44429100  | -1.94778900 |
| H | -3.73301600 | 2.41961200  | -3.06026500 |
| C | -4.68549800 | -0.15965200 | -0.94830700 |
| H | -5.48935300 | 0.34199400  | -0.39967000 |
| H | -5.13125700 | -0.74743200 | -1.75590200 |
| H | -4.17015300 | -0.85078900 | -0.27696500 |
| C | -0.46547400 | -1.12086400 | -1.85160000 |
| H | 0.35698600  | -0.51895300 | -2.26835100 |
| H | -0.78111900 | -1.80685200 | -2.65571200 |
| C | 1.41058900  | -1.50223300 | -0.24268500 |
| O | 2.01399200  | -1.95186800 | 0.81709600  |
| C | 5.65920500  | 0.29674200  | -1.87024000 |
| H | 5.49702200  | 1.36841300  | -1.70684000 |
| H | 6.68618200  | 0.05144000  | -1.56760900 |
| H | 5.55439300  | 0.09761400  | -2.94206800 |
| C | 4.62283800  | -0.51243000 | -1.07879300 |
| C | 4.80709600  | -2.02022200 | -1.32786700 |

|   |            |             |             |
|---|------------|-------------|-------------|
| H | 4.06695100 | -2.56848300 | -0.73858000 |
| H | 4.65364100 | -2.24650600 | -2.38855100 |
| H | 5.81175800 | -2.35799600 | -1.04043500 |
| C | 4.76476200 | -0.23326000 | 0.42978100  |
| H | 4.64129800 | 0.84018700  | 0.62249000  |
| H | 3.98143800 | -0.78989100 | 0.95765400  |
| H | 5.74812200 | -0.54005000 | 0.81167700  |
| O | 3.33850800 | -0.11808800 | -1.53897400 |
| H | 2.48386400 | -0.80960800 | -1.15850200 |

4'

|    |             |             |             |
|----|-------------|-------------|-------------|
| Cu | -1.29406700 | 0.21432200  | -1.02713100 |
| B  | 1.63438600  | -1.70516700 | -0.73573000 |
| C  | 1.65047700  | 0.54447800  | -1.41084400 |
| C  | -2.47528300 | -2.98783000 | -0.95864500 |
| O  | 2.78248200  | -1.96270900 | 0.00311000  |
| O  | 0.50212400  | -2.16422100 | -0.05035400 |
| C  | -3.08125900 | -0.57596600 | -0.96016800 |
| N  | -3.43617300 | -1.89384100 | -0.93141100 |
| N  | -4.27654700 | 0.08034500  | -0.94085000 |
| C  | -4.81311400 | -2.05391600 | -0.90094700 |
| C  | -5.34382100 | -0.80237300 | -0.90830500 |
| C  | 2.36110000  | -2.09309200 | 1.37654200  |
| C  | 0.92623600  | -2.71005600 | 1.21504600  |
| C  | -4.39968000 | 1.53539400  | -0.99779200 |
| H  | -3.50125800 | 1.99308600  | -0.56202600 |
| H  | -5.27888400 | 1.83799100  | -0.42194500 |
| H  | -4.52129900 | 1.86220800  | -2.03566600 |
| H  | -2.48381800 | -3.47983300 | -1.93703300 |
| H  | -2.73150200 | -3.72228200 | -0.18839900 |
| H  | -1.47933500 | -2.58858700 | -0.75867800 |
| C  | 2.97804700  | 1.11468900  | -1.22034700 |
| C  | 4.16631100  | 0.39014500  | -1.51792500 |
| C  | 5.43533800  | 0.93473500  | -1.34085800 |
| C  | 5.60173900  | 2.23374100  | -0.85584600 |
| C  | 3.17849600  | 2.43535400  | -0.72158400 |
| C  | 4.45022900  | 2.96899200  | -0.55001100 |
| H  | 4.09638700  | -0.63259200 | -1.86609200 |
| H  | 4.54520600  | 3.98549400  | -0.16900300 |
| H  | 6.30800500  | 0.32831200  | -1.58164500 |
| H  | 6.59369500  | 2.65821500  | -0.71755400 |
| H  | 2.29635200  | 3.01122600  | -0.47898100 |
| C  | 2.34000200  | -0.68038600 | 1.97438200  |
| H  | 2.05468800  | -0.69003800 | 3.03137900  |
| H  | 3.33796400  | -0.24654600 | 1.87684200  |
| H  | 1.65732900  | -0.03396600 | 1.41698100  |
| C  | 3.36316800  | -2.97265900 | 2.11612200  |
| H  | 4.33173700  | -2.46604300 | 2.14817000  |

|   |             |             |             |
|---|-------------|-------------|-------------|
| H | 3.03743300  | -3.15379600 | 3.14667100  |
| H | 3.50023800  | -3.93397900 | 1.61634900  |
| C | -0.07706700 | -2.29250200 | 2.28517300  |
| H | -1.04835800 | -2.75729100 | 2.08556200  |
| H | 0.25452000  | -2.61323400 | 3.27923400  |
| H | -0.21671100 | -1.21203100 | 2.28836400  |
| C | 0.94688200  | -4.23580100 | 1.06335300  |
| H | 1.19706700  | -4.73655900 | 2.00438800  |
| H | -0.04368500 | -4.57569200 | 0.74546500  |
| H | 1.67190500  | -4.53515900 | 0.30190300  |
| C | 1.55332200  | -0.86437100 | -2.03576700 |
| H | 0.57657200  | -0.97366800 | -2.51694300 |
| H | 2.32826400  | -1.04796200 | -2.78662300 |
| C | 0.43672300  | 1.12081200  | -0.98233800 |
| O | 0.38342600  | 2.29504000  | -0.40238100 |
| C | -1.47308700 | 1.30762000  | 2.22455700  |
| H | -0.51985000 | 1.02476900  | 1.77256000  |
| H | -1.39274400 | 1.22727900  | 3.31647400  |
| H | -2.23506200 | 0.60256700  | 1.87508100  |
| C | -1.83037200 | 2.73717800  | 1.77363400  |
| C | -3.20336600 | 3.13642700  | 2.33017700  |
| H | -3.47601000 | 4.13336800  | 1.96809100  |
| H | -3.97001700 | 2.42934900  | 1.99336100  |
| H | -3.20658300 | 3.14849600  | 3.42688400  |
| C | -0.74757600 | 3.71463600  | 2.26920500  |
| H | 0.21109200  | 3.44216800  | 1.81966900  |
| H | -0.99607400 | 4.73446700  | 1.95571800  |
| H | -0.65144300 | 3.69765200  | 3.36251800  |
| O | -1.91489500 | 2.79924800  | 0.36528100  |
| H | -0.93279400 | 2.60953300  | -0.01990300 |
| H | -6.36931400 | -0.46879700 | -0.88186900 |
| H | -5.28443900 | -3.02354300 | -0.86415100 |

5'

|    |             |             |             |
|----|-------------|-------------|-------------|
| Cu | -2.05965800 | 0.60052800  | 0.35190000  |
| B  | 0.85604600  | -1.03012800 | -0.96768500 |
| C  | 2.39935100  | 1.03064000  | -1.13655400 |
| C  | 0.81713400  | 1.92301600  | 1.79737400  |
| O  | 0.40789400  | -0.92569500 | 0.33944300  |
| O  | 0.86415700  | -2.33924100 | -1.39701300 |
| C  | -1.22853300 | 2.32335500  | 0.40985000  |
| N  | -0.08007000 | 2.75146000  | 0.99417600  |
| N  | -1.70018300 | 3.42903800  | -0.23795200 |
| C  | 0.17894500  | 4.07918300  | 0.70279900  |
| C  | -0.84535100 | 4.51235700  | -0.07583300 |
| C  | 0.41378500  | -2.26021700 | 0.91936200  |
| C  | 0.28903800  | -3.16949800 | -0.35692000 |
| C  | -2.89869600 | 3.44835100  | -1.05356200 |

|   |             |             |             |
|---|-------------|-------------|-------------|
| H | 1.12579000  | 4.52783200  | 0.95069800  |
| H | -1.02249600 | 5.46390600  | -0.55050600 |
| H | -3.37836000 | 2.47251000  | -0.97245700 |
| H | -2.64787500 | 3.63756900  | -2.10241700 |
| H | -3.59002400 | 4.22226500  | -0.70390700 |
| H | 0.67954800  | 0.88279100  | 1.51077000  |
| H | 0.59888200  | 2.06508200  | 2.86169800  |
| H | 1.83942100  | 2.22691600  | 1.56594800  |
| C | 3.59602400  | 0.39718500  | -0.62338500 |
| C | 3.90712100  | -0.95935500 | -0.92123800 |
| C | 5.04541700  | -1.58553500 | -0.41668000 |
| C | 5.94149300  | -0.89752700 | 0.40370900  |
| C | 4.54061800  | 1.08421000  | 0.19437000  |
| C | 5.67076700  | 0.44735600  | 0.69050300  |
| H | 3.25216800  | -1.53086900 | -1.56889300 |
| H | 6.35995700  | 1.01185200  | 1.31770400  |
| H | 5.23400200  | -2.62666100 | -0.67555700 |
| H | 6.82666900  | -1.38827400 | 0.80085600  |
| H | 4.34478600  | 2.12855900  | 0.40274700  |
| C | -0.74102700 | -2.38663600 | 1.90636900  |
| H | -0.79658100 | -3.41357800 | 2.28701600  |
| H | -0.55865600 | -1.72597600 | 2.76088700  |
| H | -1.69461500 | -2.10883000 | 1.45180800  |
| C | 1.75611300  | -2.40606900 | 1.64551300  |
| H | 1.83205500  | -1.61699800 | 2.39891500  |
| H | 1.83081100  | -3.37336500 | 2.15325100  |
| H | 2.60170900  | -2.28865100 | 0.96445400  |
| C | -1.16205900 | -3.45067200 | -0.75418800 |
| H | -1.17033300 | -3.86109700 | -1.76906800 |
| H | -1.61909100 | -4.18472400 | -0.08161800 |
| H | -1.76783000 | -2.54043200 | -0.71856400 |
| C | 1.09283100  | -4.46468100 | -0.29253200 |
| H | 0.75019000  | -5.09317000 | 0.53671100  |
| H | 0.95790800  | -5.02462200 | -1.22294000 |
| H | 2.15806600  | -4.26388800 | -0.16583900 |
| C | 1.35749100  | 0.17328000  | -1.84556300 |
| H | 0.49368000  | 0.81368600  | -2.07813900 |
| H | 1.70395200  | -0.23075100 | -2.81220100 |
| C | 2.13224000  | 2.39631600  | -0.99757700 |
| O | 2.75007400  | 3.29313900  | -0.34313900 |
| C | -5.24231500 | -0.09514300 | 0.73270100  |
| H | -4.92209700 | 0.93914800  | 0.56003000  |
| H | -6.31278300 | -0.17348600 | 0.50003500  |
| H | -5.09606300 | -0.31525400 | 1.79536400  |
| C | -4.37902800 | -1.05477100 | -0.11463400 |
| C | -4.83814700 | -2.50478900 | 0.14687300  |
| H | -4.24132600 | -3.19685600 | -0.45495500 |
| H | -4.67882000 | -2.75211600 | 1.20150900  |

|   |             |             |             |
|---|-------------|-------------|-------------|
| H | -5.89802300 | -2.65767400 | -0.09335000 |
| C | -4.56767300 | -0.72575300 | -1.61105000 |
| H | -4.24484700 | 0.30355600  | -1.80634500 |
| H | -3.93918500 | -1.38982800 | -2.21261200 |
| H | -5.60970700 | -0.83170800 | -1.94095500 |
| O | -3.03482200 | -0.96234400 | 0.23596300  |
| H | 1.19908300  | 2.71049300  | -1.53060200 |

## 5

|    |             |             |             |
|----|-------------|-------------|-------------|
| Cu | -1.35532700 | -1.67330200 | -0.17663900 |
| B  | 0.70520000  | 0.72591200  | 0.83434200  |
| C  | 2.12248500  | -1.20986800 | 0.35338200  |
| C  | -2.70359700 | -0.30643300 | 2.52666900  |
| O  | -0.54065100 | 0.72036000  | 0.22741300  |
| O  | 1.34994200  | 1.92813300  | 0.65044600  |
| C  | -3.11065100 | -1.01894900 | 0.17889300  |
| N  | -3.52337000 | -0.41542800 | 1.32716900  |
| N  | -4.15501200 | -0.84625600 | -0.67820000 |
| C  | -4.78978300 | 0.13245200  | 1.18647300  |
| C  | -5.19106400 | -0.14139900 | -0.08220600 |
| C  | -0.76315500 | 2.02078800  | -0.37721600 |
| C  | 0.69832700  | 2.59123000  | -0.46544600 |
| C  | -4.16066100 | -1.32159700 | -2.05457500 |
| H  | -5.00653500 | -1.99351200 | -2.22143200 |
| H  | -3.22862100 | -1.86028300 | -2.22550900 |
| H  | -4.22248600 | -0.47849400 | -2.74823300 |
| H  | -1.83784200 | -0.95526900 | 2.40339500  |
| H  | -3.27884900 | -0.62170200 | 3.40044100  |
| H  | -2.35709000 | 0.72066200  | 2.65907700  |
| C  | 3.56764900  | -0.94185600 | 0.24251100  |
| C  | 4.45807400  | -1.90561500 | -0.28027900 |
| C  | 5.81961900  | -1.64775400 | -0.40793300 |
| C  | 6.35427100  | -0.42661200 | 0.00960100  |
| C  | 4.13031300  | 0.27924200  | 0.67106000  |
| C  | 5.49709200  | 0.52865700  | 0.55642100  |
| H  | 4.07504600  | -2.88118700 | -0.56085100 |
| H  | 5.89293700  | 1.48419200  | 0.89191900  |
| H  | 6.47217100  | -2.41658300 | -0.81399000 |
| H  | 7.41891900  | -0.23045600 | -0.07792300 |
| H  | 3.48477000  | 1.05531500  | 1.06382200  |
| C  | -1.66582500 | 2.80833700  | 0.57610000  |
| H  | -1.91585400 | 3.79365500  | 0.17284200  |
| H  | -2.59701000 | 2.25394500  | 0.72316500  |
| H  | -1.18246500 | 2.94373000  | 1.54755500  |
| C  | -1.46070300 | 1.81084000  | -1.71648400 |
| H  | -2.45686500 | 1.39306900  | -1.54555600 |
| H  | -1.57386100 | 2.75949600  | -2.25118300 |
| H  | -0.90424000 | 1.11417000  | -2.34468100 |

|   |             |             |             |
|---|-------------|-------------|-------------|
| C | 0.81601700  | 4.09728300  | -0.27722500 |
| H | 1.86816400  | 4.38934800  | -0.32691800 |
| H | 0.27730100  | 4.63009400  | -1.06758700 |
| H | 0.42201400  | 4.41222600  | 0.69043600  |
| C | 1.44055200  | 2.13921600  | -1.72716300 |
| H | 1.04838800  | 2.62580100  | -2.62479600 |
| H | 2.49731200  | 2.39571400  | -1.62194200 |
| H | 1.37683800  | 1.05438300  | -1.85040100 |
| C | 1.32827600  | -0.54914700 | 1.48148400  |
| H | 0.55525400  | -1.24346300 | 1.83324100  |
| H | 1.99013900  | -0.32058600 | 2.32189100  |
| C | 1.51027800  | -2.02098000 | -0.56536900 |
| O | 0.26304200  | -2.41293600 | -0.63006200 |
| H | 2.14324400  | -2.42875700 | -1.36319900 |
| H | -6.10792800 | 0.09105100  | -0.59988500 |
| H | -5.28942800 | 0.64996300  | 1.98978500  |

**<sup>t</sup>BuO<sup>-</sup>**

|   |             |             |             |
|---|-------------|-------------|-------------|
| C | -4.95041200 | -1.45280000 | -1.16252700 |
| H | -5.03500500 | -2.14783300 | -0.32117400 |
| H | -5.65956600 | -1.75485900 | -1.94190900 |
| H | -3.94123800 | -1.52054300 | -1.57883700 |
| C | -5.21368500 | -0.01355000 | -0.67800700 |
| C | -5.00687500 | 0.98733200  | -1.82941700 |
| H | -5.14680800 | 2.00878600  | -1.46130000 |
| H | -3.98936500 | 0.88529900  | -2.21881800 |
| H | -5.71250900 | 0.81139800  | -2.64999600 |
| C | -6.66249000 | 0.09770500  | -0.13936300 |
| H | -6.80998700 | -0.60174200 | 0.68815700  |
| H | -6.84976200 | 1.11139900  | 0.22537100  |
| H | -7.38101400 | -0.13268000 | -0.93350300 |
| O | -4.41217000 | 0.30140100  | 0.41830300  |

**Cat.**

|    |             |             |             |
|----|-------------|-------------|-------------|
| C  | 1.84578900  | -0.51089000 | 0.02337600  |
| C  | 1.29622600  | -0.71441800 | 1.79962600  |
| H  | 1.26355800  | -1.79691000 | 1.96569400  |
| H  | 2.08601200  | -0.33120600 | 2.45675600  |
| C  | -0.05372700 | -0.07687300 | 2.18556000  |
| H  | -0.06782500 | -0.01266300 | 3.28050600  |
| H  | -0.09923200 | 0.95701600  | 1.82830400  |
| C  | -1.33801300 | -0.82308700 | 1.77002500  |
| H  | -2.15678900 | -0.52007600 | 2.43307000  |
| H  | -1.19587300 | -1.90163200 | 1.89614900  |
| P  | -1.89022800 | -0.52019000 | 0.00089300  |
| Pd | -0.00096900 | -1.08225800 | -1.16984500 |
| C  | 3.53295000  | -1.25013100 | 0.14341700  |
| C  | 4.62244900  | -0.58308700 | 0.72163000  |



|   |             |             |             |
|---|-------------|-------------|-------------|
| C | 3.71107800  | -2.55170900 | -0.34321700 |
| C | 5.86368300  | -1.21122800 | 0.81654800  |
| H | 4.50243400  | 0.43265300  | 1.08579800  |
| C | 4.95017600  | -3.18445600 | -0.23852600 |
| H | 2.87119200  | -3.05855700 | -0.81171200 |
| C | 6.02869200  | -2.51395800 | 0.34030900  |
| H | 6.70357300  | -0.68405200 | 1.26014600  |
| H | 5.07605800  | -4.19457900 | -0.61728100 |
| H | 6.99659500  | -3.00106300 | 0.41373400  |
| C | 2.19723400  | 1.29322800  | -0.10551400 |
| C | 2.31006300  | 2.15478700  | 0.99405400  |
| C | 2.29294000  | 1.83781300  | -1.39612100 |
| C | 2.50745800  | 3.52459700  | 0.80899700  |
| H | 2.23475300  | 1.76667100  | 2.00382800  |
| C | 2.50416400  | 3.20218100  | -1.58291700 |
| H | 2.17735000  | 1.18119600  | -2.25419500 |
| C | 2.60621400  | 4.05178600  | -0.47814300 |
| H | 2.58075300  | 4.17905800  | 1.67260400  |
| H | 2.57714700  | 3.60477300  | -2.58894100 |
| H | 2.75727200  | 5.11760300  | -0.62115900 |
| C | -3.62441500 | -1.14082400 | 0.04324800  |
| C | -4.02065700 | -2.19635900 | 0.87697400  |
| C | -4.56118600 | -0.61239500 | -0.86096300 |
| C | -5.32011400 | -2.70332100 | 0.81577900  |
| H | -3.31763800 | -2.63121800 | 1.57965400  |
| C | -5.85857200 | -1.11451800 | -0.91722700 |
| H | -4.27141600 | 0.20539600  | -1.51466400 |
| C | -6.24389800 | -2.16375100 | -0.07831600 |
| H | -5.60954100 | -3.51920200 | 1.47201200  |
| H | -6.57139700 | -0.68685000 | -1.61643800 |
| H | -7.25492600 | -2.55708200 | -0.12401000 |
| C | -2.13921800 | 1.30539000  | 0.07375200  |
| C | -3.13804900 | 1.89536100  | 0.86310400  |
| C | -1.22560100 | 2.13098400  | -0.59401900 |
| C | -3.21422100 | 3.28202100  | 0.98304800  |
| H | -3.85965500 | 1.26803100  | 1.37764600  |
| C | -1.29178900 | 3.51872300  | -0.46284900 |
| H | -0.45328700 | 1.67249000  | -1.20275100 |
| C | -2.28724300 | 4.09593400  | 0.32548500  |
| H | -3.99327800 | 3.72917000  | 1.59398400  |
| H | -0.56004300 | 4.13920600  | -0.97064300 |
| H | -2.34438900 | 5.17577600  | 0.42829400  |

**R<sub>2</sub>(Ph-I)**

|   |            |             |             |
|---|------------|-------------|-------------|
| C | 1.24874500 | -1.21564200 | 0.00000500  |
| C | 0.56386800 | 0.00063000  | 0.00000600  |
| C | 1.24950800 | 1.21617600  | 0.00000500  |
| C | 2.64568600 | 1.20678700  | -0.00000100 |

|   |             |             |             |
|---|-------------|-------------|-------------|
| C | 3.34524100  | -0.00046300 | -0.00000600 |
| C | 2.64484000  | -1.20737800 | -0.00000100 |
| H | 0.70488000  | -2.15317000 | 0.00001200  |
| H | 0.70643500  | 2.15418100  | 0.00001100  |
| H | 3.18341200  | 2.15012900  | -0.00000100 |
| H | 4.43065200  | -0.00075400 | -0.00001500 |
| H | 3.18187400  | -2.15110000 | -0.00000200 |
| I | -1.55461500 | 0.00000100  | -0.00000100 |

### R<sub>3</sub>(Ph-OTf)

|   |             |             |             |
|---|-------------|-------------|-------------|
| S | -1.26824700 | -0.89950400 | -0.09329100 |
| O | -2.31727500 | -1.44116000 | -0.93237000 |
| O | -0.84833100 | -1.50595100 | 1.15855600  |
| C | -1.70854200 | 0.87909300  | 0.27887600  |
| F | -2.90708800 | 0.90233500  | 0.85454200  |
| F | -1.73779200 | 1.58075900  | -0.85416100 |
| F | -0.80204800 | 1.40298000  | 1.10257800  |
| O | 0.00942600  | -0.66826500 | -1.09341400 |
| C | 1.26174600  | -0.30566700 | -0.55043200 |
| C | 2.03526400  | -1.25198500 | 0.11216100  |
| C | 1.70102200  | 0.99524500  | -0.77049400 |
| C | 3.29520500  | -0.87037300 | 0.57387000  |
| H | 1.65095500  | -2.25286100 | 0.26502400  |
| C | 2.96596900  | 1.35898100  | -0.30956400 |
| H | 1.05756500  | 1.69505900  | -1.29120700 |
| C | 3.76120000  | 0.42902100  | 0.36325300  |
| H | 3.91323200  | -1.59320300 | 1.09650200  |
| H | 3.32685600  | 2.36892600  | -0.47528900 |
| H | 4.74395200  | 0.71658900  | 0.72280000  |

### COM<sub>R<sub>2</sub></sub>-Pd(dppp)

|   |             |             |             |
|---|-------------|-------------|-------------|
| P | -2.04933300 | 0.08708700  | -0.43273300 |
| C | -1.91828600 | 0.09367900  | -2.27298800 |
| H | -1.76507300 | -0.95986700 | -2.52864600 |
| H | -2.88524200 | 0.39813300  | -2.68763600 |
| C | -0.78331500 | 0.94774600  | -2.86623500 |
| H | -0.93012100 | 0.96604200  | -3.95226700 |
| H | -0.86145200 | 1.98792500  | -2.53264500 |
| C | 0.63724300  | 0.42699400  | -2.60652300 |
| H | 1.34543200  | 0.93129000  | -3.27135200 |
| H | 0.68936900  | -0.64826100 | -2.79929800 |
| P | 1.24958800  | 0.66401200  | -0.87877000 |
| C | -3.53183800 | -0.93522400 | -0.10016700 |
| C | -4.81724900 | -0.37468300 | -0.15366000 |
| C | -3.38062800 | -2.29503200 | 0.20506000  |
| C | -5.93684800 | -1.16678300 | 0.09411100  |
| H | -4.94243800 | 0.68049900  | -0.37397800 |

|    |             |             |             |
|----|-------------|-------------|-------------|
| C  | -4.50620800 | -3.08192600 | 0.44938200  |
| H  | -2.38925800 | -2.73736900 | 0.22284200  |
| C  | -5.78275900 | -2.52128700 | 0.39698500  |
| H  | -6.92818800 | -0.72508300 | 0.05572200  |
| H  | -4.37990400 | -4.13491900 | 0.68124300  |
| H  | -6.65608900 | -3.13616000 | 0.59341700  |
| C  | -2.59941300 | 1.77030900  | 0.04177200  |
| C  | -2.95087900 | 2.76271800  | -0.88066000 |
| C  | -2.64052300 | 2.07486100  | 1.41232100  |
| C  | -3.31085700 | 4.03980400  | -0.44435300 |
| H  | -2.94446700 | 2.55147500  | -1.94360700 |
| C  | -3.01472300 | 3.34253900  | 1.84801500  |
| H  | -2.36411500 | 1.31406000  | 2.13660700  |
| C  | -3.34154900 | 4.33352600  | 0.91758200  |
| H  | -3.56820400 | 4.80295800  | -1.17246700 |
| H  | -3.04430900 | 3.56078200  | 2.91126600  |
| H  | -3.62077100 | 5.32700000  | 1.25487600  |
| C  | 3.01228000  | 0.22298800  | -0.97883200 |
| C  | 3.39770800  | -0.95554500 | -1.63388900 |
| C  | 3.97261500  | 0.99382000  | -0.31042300 |
| C  | 4.73591100  | -1.34532600 | -1.62809300 |
| H  | 2.65368600  | -1.59165400 | -2.10072200 |
| C  | 5.30648500  | 0.59308700  | -0.30387000 |
| H  | 3.67518300  | 1.88987500  | 0.22160700  |
| C  | 5.69110900  | -0.57452100 | -0.96456100 |
| H  | 5.02671300  | -2.26191500 | -2.13201500 |
| H  | 6.04283000  | 1.18874700  | 0.22666300  |
| H  | 6.73104800  | -0.88717800 | -0.95446200 |
| C  | 1.21176000  | 2.47696600  | -0.65638000 |
| C  | 1.84033100  | 3.33675000  | -1.57085300 |
| C  | 0.49355400  | 3.02096900  | 0.41357400  |
| C  | 1.73602800  | 4.71745400  | -1.41887800 |
| H  | 2.41845300  | 2.92699500  | -2.39352900 |
| C  | 0.38434400  | 4.40376700  | 0.56214000  |
| H  | 0.00807000  | 2.35191200  | 1.11409300  |
| C  | 1.00315700  | 5.25223100  | -0.35498700 |
| H  | 2.22460400  | 5.37734200  | -2.12942500 |
| H  | -0.19287500 | 4.81040000  | 1.38579900  |
| H  | 0.91869600  | 6.32910100  | -0.24347800 |
| Pd | -0.01811700 | -0.50023400 | 0.71640200  |
| C  | 2.63395600  | -1.66162400 | 1.60104600  |
| C  | 1.76539400  | -0.58393900 | 1.77783800  |
| C  | 2.12449600  | 0.47155300  | 2.61928100  |
| C  | 3.36766400  | 0.46253200  | 3.26197600  |
| C  | 4.24534700  | -0.60420000 | 3.07151300  |
| C  | 3.87352600  | -1.66632300 | 2.24473900  |
| H  | 2.35275200  | -2.47500100 | 0.93987600  |
| H  | 3.64631600  | 1.29192500  | 3.90710900  |

|   |             |             |             |
|---|-------------|-------------|-------------|
| H | 5.21351300  | -0.60874600 | 3.56408600  |
| H | 4.55267000  | -2.50018800 | 2.09027300  |
| I | 0.16386000  | -3.04711200 | -1.06800100 |
| H | 1.45511800  | 1.31379100  | 2.76606900  |
| C | -0.81461800 | -1.27850900 | 2.31359800  |
| O | -1.24453300 | -1.78611500 | 3.24407900  |

**TS5<sub>a</sub>**

|   |   |             |             |             |
|---|---|-------------|-------------|-------------|
| P | 0 | 2.07311500  | -0.32873000 | 0.73071900  |
| C | 0 | 2.01050200  | 0.16587700  | 2.52195900  |
| H | 0 | 1.65672100  | -0.73178200 | 3.04218000  |
| H | 0 | 3.03088700  | 0.34499900  | 2.87953500  |
| C | 0 | 1.11388300  | 1.36560000  | 2.87805400  |
| H | 0 | 1.33156100  | 1.63224600  | 3.91937500  |
| H | 0 | 1.39625600  | 2.23791200  | 2.27941700  |
| C | 0 | -0.40613200 | 1.14648000  | 2.76912300  |
| H | 0 | -0.92750700 | 1.94734600  | 3.30348900  |
| H | 0 | -0.69374700 | 0.20471600  | 3.24917000  |
| P | 0 | -1.04344400 | 1.05783700  | 1.01944400  |
| C | 0 | 3.29778700  | -1.69214600 | 0.78911000  |
| C | 0 | 4.66769600  | -1.46859400 | 0.98546400  |
| C | 0 | 2.82446100  | -3.00415300 | 0.65312200  |
| C | 0 | 5.55012500  | -2.54549000 | 1.05264200  |
| H | 0 | 5.04341300  | -0.45286800 | 1.06940100  |
| C | 0 | 3.70883700  | -4.08092100 | 0.72900100  |
| H | 0 | 1.76394900  | -3.17174000 | 0.48117400  |
| C | 0 | 5.07105300  | -3.85221600 | 0.92796800  |
| H | 0 | 6.61149600  | -2.36690300 | 1.19833900  |
| H | 0 | 3.33472400  | -5.09489300 | 0.62463800  |
| H | 0 | 5.76081100  | -4.68944200 | 0.97898300  |
| C | 0 | 2.95884600  | 1.03897700  | -0.10941200 |
| C | 0 | 3.64360400  | 2.06374100  | 0.55553900  |
| C | 0 | 2.88668100  | 1.06881800  | -1.51178300 |
| C | 0 | 4.23783500  | 3.10158100  | -0.16530800 |
| H | 0 | 3.71140400  | 2.06596000  | 1.63822700  |
| C | 0 | 3.49745500  | 2.09266100  | -2.23065000 |
| H | 0 | 2.32415400  | 0.29683200  | -2.03013300 |
| C | 0 | 4.16796700  | 3.11712600  | -1.55779000 |
| H | 0 | 4.75424800  | 3.89729700  | 0.36331300  |
| H | 0 | 3.43541400  | 2.10152900  | -3.31485500 |
| H | 0 | 4.62919100  | 3.92584900  | -2.11663900 |
| C | 0 | -2.85404300 | 1.17529000  | 1.23605900  |
| C | 0 | -3.51202400 | 0.08034800  | 1.82025800  |
| C | 0 | -3.61478800 | 2.24671200  | 0.74561100  |
| C | 0 | -4.89975600 | 0.07302200  | 1.93836800  |
| H | 0 | -2.94063500 | -0.78215100 | 2.14749400  |
| C | 0 | -5.00560400 | 2.23037000  | 0.85747600  |
| H | 0 | -3.12147700 | 3.09016900  | 0.27538200  |

|    |   |             |             |             |
|----|---|-------------|-------------|-------------|
| C  | 0 | -5.65046700 | 1.14792900  | 1.45719900  |
| H  | 0 | -5.39524000 | -0.78236800 | 2.38707200  |
| H  | 0 | -5.58499700 | 3.06482600  | 0.47306900  |
| H  | 0 | -6.73316900 | 1.13585700  | 1.53892400  |
| C  | 0 | -0.54475000 | 2.68636400  | 0.33776700  |
| C  | 0 | -0.62617600 | 3.87469100  | 1.08091900  |
| C  | 0 | -0.01428800 | 2.73047400  | -0.95852600 |
| C  | 0 | -0.17108500 | 5.07752300  | 0.54365100  |
| H  | 0 | -1.04805900 | 3.86258900  | 2.08140200  |
| C  | 0 | 0.44059000  | 3.93463100  | -1.49600700 |
| H  | 0 | 0.05152500  | 1.81237400  | -1.53321800 |
| C  | 0 | 0.36837400  | 5.10724100  | -0.74486400 |
| H  | 0 | -0.23369400 | 5.98980100  | 1.12964400  |
| H  | 0 | 0.86494200  | 3.95001500  | -2.49457200 |
| H  | 0 | 0.73128800  | 6.04307700  | -1.15951000 |
| Pd | 0 | -0.04475600 | -0.69352900 | -0.26422900 |
| C  | 0 | -2.37219600 | -0.18548500 | -2.04012100 |
| C  | 0 | -1.41680600 | -1.12478700 | -1.58749500 |
| C  | 0 | -0.40967900 | -1.61493800 | -2.46175900 |
| C  | 0 | -0.25094400 | -0.98567200 | -3.71836200 |
| C  | 0 | -1.11860900 | 0.01713500  | -4.11783200 |
| C  | 0 | -2.19208700 | 0.39723200  | -3.28168700 |
| H  | 0 | 0.13491100  | -2.52267100 | -2.23405200 |
| H  | 0 | 0.52276300  | -1.34325600 | -4.39291000 |
| H  | 0 | -1.00500300 | 0.48141100  | -5.09262100 |
| H  | 0 | -2.87797200 | 1.17512000  | -3.60639800 |
| I  | 0 | -2.32177500 | -2.99606000 | -0.13557100 |
| H  | 0 | -3.17792700 | 0.12251700  | -1.38410700 |

**6a**

|   |             |            |            |
|---|-------------|------------|------------|
| P | -1.32772800 | 4.01063100 | 2.73723700 |
| C | 0.47749500  | 3.62072200 | 2.86496100 |
| H | 0.87215600  | 3.80972000 | 1.85540400 |
| H | 0.94687500  | 4.37208600 | 3.51533000 |
| C | 0.85101300  | 2.20807300 | 3.31132400 |
| H | 1.93158700  | 2.19489700 | 3.50484500 |
| H | 0.37590500  | 1.96245500 | 4.27258800 |
| C | 0.55083000  | 1.10784700 | 2.29562500 |
| H | 1.11393800  | 0.19885500 | 2.54560200 |
| H | 0.87809500  | 1.42295200 | 1.29500300 |
| P | -1.23460700 | 0.63393200 | 2.17138500 |
| C | -1.21501800 | 5.74212700 | 2.15793400 |
| C | -1.07677300 | 6.81212700 | 3.04498200 |
| C | -1.18907200 | 5.98073200 | 0.78150800 |
| C | -0.91409000 | 8.10520600 | 2.55806300 |
| H | -1.09961500 | 6.63602400 | 4.11975600 |
| C | -1.01732200 | 7.27248300 | 0.29766400 |
| H | -1.32355100 | 5.15000200 | 0.08919600 |

|    |             |             |             |
|----|-------------|-------------|-------------|
| C  | -0.88270700 | 8.33580100  | 1.18611100  |
| H  | -0.81318500 | 8.93499200  | 3.25387000  |
| H  | -1.00308800 | 7.45059300  | -0.77484100 |
| H  | -0.75906700 | 9.34774600  | 0.80727000  |
| C  | -1.89968400 | 4.14444600  | 4.47180500  |
| C  | -1.04545900 | 4.05957000  | 5.57451600  |
| C  | -3.27390900 | 4.31308100  | 4.68810500  |
| C  | -1.55466200 | 4.12552100  | 6.86866900  |
| H  | 0.02763000  | 3.94142600  | 5.43829200  |
| C  | -3.77833000 | 4.38917100  | 5.98099200  |
| H  | -3.94836500 | 4.37937500  | 3.83222400  |
| C  | -2.92018700 | 4.28854600  | 7.07416100  |
| H  | -0.87879100 | 4.05252500  | 7.71755000  |
| H  | -4.84631100 | 4.52475200  | 6.13441300  |
| H  | -3.31689300 | 4.34101900  | 8.08544700  |
| C  | -1.17744100 | -0.87134100 | 1.14591900  |
| C  | -0.38442500 | -0.89595800 | -0.00532800 |
| C  | -1.99840700 | -1.96480600 | 1.43409600  |
| C  | -0.39628900 | -2.00585600 | -0.84244200 |
| H  | 0.23781900  | -0.04081400 | -0.26574700 |
| C  | -2.00968800 | -3.07217300 | 0.59368000  |
| H  | -2.64579900 | -1.94408600 | 2.30902300  |
| C  | -1.20691600 | -3.09656800 | -0.54269300 |
| H  | 0.22646100  | -2.01583400 | -1.73386300 |
| H  | -2.65597300 | -3.91546800 | 0.82514100  |
| H  | -1.21842000 | -3.96317200 | -1.19940700 |
| C  | -1.61439100 | 0.06542300  | 3.86605900  |
| C  | -0.87846000 | -0.95726700 | 4.47774900  |
| C  | -2.60063500 | 0.72976700  | 4.59890700  |
| C  | -1.12599000 | -1.29969800 | 5.80123100  |
| H  | -0.11451300 | -1.49480500 | 3.91638500  |
| C  | -2.83908800 | 0.39437300  | 5.92872000  |
| H  | -3.17269000 | 1.52901100  | 4.12578400  |
| C  | -2.10239800 | -0.62032800 | 6.52880000  |
| H  | -0.55367700 | -2.09677300 | 6.26985100  |
| H  | -3.59641400 | 0.93624200  | 6.49134800  |
| H  | -2.28681600 | -0.88582500 | 7.56718100  |
| Pd | -2.65927000 | 2.36154400  | 1.53941800  |
| C  | -3.56584700 | 0.53315600  | -0.66141300 |
| C  | -3.79464300 | 0.89389200  | 0.66663200  |
| C  | -4.78904600 | 0.23424200  | 1.38899800  |
| C  | -5.54586700 | -0.77288400 | 0.78828800  |
| C  | -5.31775700 | -1.12569700 | -0.53824100 |
| C  | -4.32736000 | -0.46711500 | -1.26274300 |
| H  | -2.78707400 | 1.03450400  | -1.23743300 |
| H  | -6.32209700 | -1.27801100 | 1.36151700  |
| H  | -5.91014300 | -1.90891200 | -1.00696800 |
| H  | -4.14120200 | -0.73461000 | -2.30195000 |

|                        |             |             |             |
|------------------------|-------------|-------------|-------------|
| I                      | -4.58521400 | 4.09697100  | 0.79218400  |
| H                      | -4.98827700 | 0.50781600  | 2.42572500  |
| <b>TS6<sub>a</sub></b> |             |             |             |
| P                      | -2.03840600 | 0.07645700  | -0.38253000 |
| C                      | -1.93382500 | 0.11379300  | -2.23042100 |
| H                      | -1.74750400 | -0.93189000 | -2.49774600 |
| H                      | -2.92350900 | 0.37977900  | -2.61802600 |
| C                      | -0.85786400 | 1.01609900  | -2.86600100 |
| H                      | -1.06009900 | 1.03747300  | -3.94312800 |
| H                      | -0.96444400 | 2.04889600  | -2.51792400 |
| C                      | 0.60161900  | 0.56219900  | -2.68405100 |
| H                      | 1.25314800  | 1.12218000  | -3.36228600 |
| H                      | 0.69967700  | -0.50326400 | -2.91242500 |
| P                      | 1.20074500  | 0.77192800  | -0.94952300 |
| C                      | -3.48334600 | -0.99758800 | -0.06197200 |
| C                      | -4.78981500 | -0.49883100 | -0.17517400 |
| C                      | -3.27827900 | -2.33928000 | 0.28560900  |
| C                      | -5.87942300 | -1.33682500 | 0.05353200  |
| H                      | -4.95448200 | 0.54457800  | -0.42569400 |
| C                      | -4.37384200 | -3.17322500 | 0.50948300  |
| H                      | -2.26810600 | -2.72834300 | 0.35813300  |
| C                      | -5.67217300 | -2.67506600 | 0.39590400  |
| H                      | -6.88865800 | -0.94458000 | -0.02999400 |
| H                      | -4.20767600 | -4.21263500 | 0.77475100  |
| H                      | -6.52238800 | -3.32610700 | 0.57684500  |
| C                      | -2.62114400 | 1.73224000  | 0.13819500  |
| C                      | -3.01936400 | 2.73461700  | -0.75374500 |
| C                      | -2.63845600 | 2.00212900  | 1.51632000  |
| C                      | -3.40371500 | 3.99087300  | -0.27901000 |
| H                      | -3.03066000 | 2.54714400  | -1.82134000 |
| C                      | -3.03896200 | 3.24780900  | 1.98973200  |
| H                      | -2.32212300 | 1.22959400  | 2.21208300  |
| C                      | -3.41300400 | 4.25075200  | 1.09005800  |
| H                      | -3.69681400 | 4.76417300  | -0.98252500 |
| H                      | -3.05199900 | 3.44087600  | 3.05826500  |
| H                      | -3.71166500 | 5.22796500  | 1.45705400  |
| C                      | 2.98676900  | 0.40510500  | -0.97862700 |
| C                      | 3.43194300  | -0.80423800 | -1.53496400 |
| C                      | 3.90489400  | 1.25522100  | -0.34754000 |
| C                      | 4.78323200  | -1.13985800 | -1.47863100 |
| H                      | 2.71930700  | -1.49725200 | -1.97014200 |
| C                      | 5.25428000  | 0.90835100  | -0.28875800 |
| H                      | 3.56630500  | 2.18229400  | 0.10147900  |
| C                      | 5.69700900  | -0.28582500 | -0.85794600 |
| H                      | 5.11853100  | -2.07702900 | -1.91252500 |
| H                      | 5.95821800  | 1.57230400  | 0.20415500  |
| H                      | 6.74862300  | -0.55340200 | -0.81257100 |

|                |             |             |             |
|----------------|-------------|-------------|-------------|
| C              | 1.08791200  | 2.57673800  | -0.67379800 |
| C              | 1.59289800  | 3.50457900  | -1.59786700 |
| C              | 0.43834700  | 3.04041800  | 0.47591100  |
| C              | 1.43360400  | 4.87122300  | -1.37805700 |
| H              | 2.11668000  | 3.15869300  | -2.48389600 |
| C              | 0.27552300  | 4.40846300  | 0.69460300  |
| H              | 0.04571300  | 2.31757300  | 1.18178000  |
| C              | 0.76974400  | 5.32392500  | -0.23392200 |
| H              | 1.82457900  | 5.58396000  | -2.09801900 |
| H              | -0.25026200 | 4.75238800  | 1.57906400  |
| H              | 0.64001100  | 6.38952500  | -0.06962700 |
| Pd             | -0.01290200 | -0.55852100 | 0.59668900  |
| C              | 2.51648400  | -1.84281900 | 1.72359500  |
| C              | 1.54441700  | -0.90781700 | 2.09367400  |
| C              | 1.88290500  | 0.20337100  | 2.87609400  |
| C              | 3.20822800  | 0.39258300  | 3.26718400  |
| C              | 4.18423400  | -0.53142800 | 2.88653700  |
| C              | 3.83785500  | -1.64941100 | 2.12468800  |
| H              | 2.23963400  | -2.68202900 | 1.09334800  |
| H              | 3.47908900  | 1.25959400  | 3.86278600  |
| H              | 5.21797200  | -0.37764000 | 3.18138200  |
| H              | 4.60110500  | -2.35746500 | 1.81794300  |
| I              | 0.26937100  | -3.01893500 | -1.18025700 |
| H              | 1.11790000  | 0.91413600  | 3.17275400  |
| C              | -0.26609200 | -1.46996000 | 2.24914100  |
| O              | -0.67999200 | -2.08020400 | 3.15176400  |
| 7 <sub>a</sub> |             |             |             |
| P              | -1.26254600 | 0.76832200  | -1.20882700 |
| C              | -0.60740000 | 1.57244900  | -2.75041700 |
| H              | -0.60867900 | 0.77198000  | -3.49880200 |
| H              | -1.35241900 | 2.30462100  | -3.08053600 |
| C              | 0.77905500  | 2.23343200  | -2.69207800 |
| H              | 0.93382700  | 2.73237300  | -3.65645400 |
| H              | 0.78585600  | 3.02448900  | -1.93774300 |
| C              | 1.97479300  | 1.30297800  | -2.44937000 |
| H              | 2.90656000  | 1.84351200  | -2.64589600 |
| H              | 1.95281200  | 0.45476800  | -3.14308700 |
| P              | 2.05771100  | 0.54971400  | -0.74909000 |
| C              | -2.94136400 | 0.29357800  | -1.76196600 |
| C              | -4.09904100 | 0.92311200  | -1.28893700 |
| C              | -3.05543100 | -0.77282500 | -2.66702700 |
| C              | -5.35475600 | 0.49172000  | -1.71698300 |
| H              | -4.02204500 | 1.73708300  | -0.57739900 |
| C              | -4.31099300 | -1.19577000 | -3.09677700 |
| H              | -2.16743500 | -1.30158800 | -2.99688200 |
| C              | -5.46354100 | -0.56629400 | -2.61974300 |
| H              | -6.24774800 | 0.98030300  | -1.33891400 |



|    |             |             |             |
|----|-------------|-------------|-------------|
| H  | -4.38945900 | -2.02902700 | -3.78791800 |
| H  | -6.44214700 | -0.90481600 | -2.94643200 |
| C  | -1.54309100 | 2.11870500  | -0.00833900 |
| C  | -1.40023000 | 3.47632600  | -0.32016600 |
| C  | -1.91391800 | 1.75327600  | 1.29535600  |
| C  | -1.59642500 | 4.44874700  | 0.66161600  |
| H  | -1.13767200 | 3.78738100  | -1.32421500 |
| C  | -2.13757600 | 2.72678400  | 2.26438300  |
| H  | -2.02447900 | 0.70669100  | 1.55013800  |
| C  | -1.96615500 | 4.07743000  | 1.95379700  |
| H  | -1.46383900 | 5.49703100  | 0.41222000  |
| H  | -2.43295400 | 2.42489700  | 3.26466000  |
| H  | -2.12064000 | 4.83685400  | 2.71431000  |
| C  | 3.74427800  | -0.15380200 | -0.76611800 |
| C  | 3.91237300  | -1.42407600 | -1.33643600 |
| C  | 4.85679900  | 0.52918500  | -0.26004500 |
| C  | 5.18311300  | -1.98823200 | -1.42601400 |
| H  | 3.04534000  | -1.98056500 | -1.67733700 |
| C  | 6.12548000  | -0.04578700 | -0.33976700 |
| H  | 4.73324100  | 1.50131500  | 0.20499700  |
| C  | 6.29105500  | -1.30067200 | -0.92713000 |
| H  | 5.30361200  | -2.97424100 | -1.86391200 |
| H  | 6.98330700  | 0.48587100  | 0.06139600  |
| H  | 7.27912100  | -1.74750100 | -0.98487000 |
| C  | 2.11232100  | 1.99681400  | 0.36672000  |
| C  | 2.67548900  | 3.23076200  | 0.00777400  |
| C  | 1.49989400  | 1.86441400  | 1.62123700  |
| C  | 2.61726100  | 4.31430000  | 0.88352100  |
| H  | 3.15780700  | 3.35080500  | -0.95742100 |
| C  | 1.44671100  | 2.94723500  | 2.49697600  |
| H  | 1.05699600  | 0.91142000  | 1.89393000  |
| C  | 1.99926900  | 4.17392900  | 2.12758700  |
| H  | 3.05133600  | 5.26688000  | 0.59451400  |
| H  | 0.95891800  | 2.83622300  | 3.45980100  |
| H  | 1.94669700  | 5.02033600  | 2.80579400  |
| Pd | 0.12757900  | -0.86966500 | -0.29899000 |
| C  | -1.94971500 | -1.58786600 | 2.32872000  |
| C  | -2.39768200 | -1.89460700 | 1.03742000  |
| C  | -3.77034100 | -1.87898800 | 0.75148300  |
| C  | -4.68392400 | -1.52654900 | 1.74309100  |
| C  | -4.23727300 | -1.22602700 | 3.03154900  |
| C  | -2.87148900 | -1.27446600 | 3.32633300  |
| H  | -0.88494500 | -1.61210400 | 2.53458000  |
| H  | -5.74385000 | -1.48734600 | 1.50977400  |
| H  | -4.95101300 | -0.95876600 | 3.80548700  |
| H  | -2.52372200 | -1.06004100 | 4.33265300  |
| I  | 1.49922600  | -2.67595700 | 1.17698600  |
| H  | -4.10139200 | -2.11636300 | -0.25307500 |

|   |             |             |             |
|---|-------------|-------------|-------------|
| C | -1.45593400 | -2.12693300 | -0.10295100 |
| O | -1.68822000 | -2.91454800 | -0.99188800 |

**CuI**

|    |             |             |             |
|----|-------------|-------------|-------------|
| C  | -3.95301000 | 0.67939600  | -0.00011100 |
| C  | -3.95302200 | -0.67936300 | -0.00007000 |
| H  | -4.76717900 | 1.38641900  | -0.00017000 |
| H  | -4.76720500 | -1.38637000 | -0.00005800 |
| N  | -2.62424900 | -1.07345600 | 0.00009000  |
| N  | -2.62422800 | 1.07346300  | 0.00001900  |
| C  | -1.78933700 | -0.00000400 | 0.00012200  |
| C  | -2.17211100 | 2.45939300  | -0.00001500 |
| H  | -2.53466300 | 2.97532900  | 0.89266400  |
| H  | -1.08214300 | 2.46100700  | 0.00018100  |
| H  | -2.53434000 | 2.97517800  | -0.89291100 |
| C  | -2.17216400 | -2.45939600 | -0.00004900 |
| H  | -1.08219600 | -2.46103200 | 0.00105500  |
| H  | -2.53548000 | -2.97560900 | 0.89215600  |
| H  | -2.53365300 | -2.97488900 | -0.89341700 |
| Cu | 0.14400300  | -0.00000200 | 0.00006500  |
| I  | 2.61581100  | -0.00000300 | -0.00002700 |

**CuOTf**

|    |             |             |             |
|----|-------------|-------------|-------------|
| C  | -3.55500200 | 1.07463500  | 0.06140300  |
| C  | -3.98852200 | -0.20862700 | 0.24200700  |
| N  | -2.86055400 | -1.01999700 | 0.11773600  |
| N  | -2.18182400 | 0.99591000  | -0.16613100 |
| C  | -1.74452400 | -0.28860400 | -0.13310400 |
| C  | -1.31954800 | 2.14962400  | -0.40708600 |
| H  | -1.33341800 | 2.81583300  | 0.45967100  |
| H  | -0.29918500 | 1.80562800  | -0.58079100 |
| H  | -1.66673800 | 2.69861000  | -1.28619800 |
| C  | -2.87145700 | -2.46936100 | 0.23902700  |
| H  | -1.85115900 | -2.82703600 | 0.10253900  |
| H  | -3.22903100 | -2.76956500 | 1.22769300  |
| H  | -3.51402400 | -2.91448400 | -0.52554100 |
| Cu | 0.05775900  | -0.83041200 | -0.39787700 |
| S  | 2.71929700  | 0.03876200  | -0.77037000 |
| O  | 3.94888400  | -0.11832800 | -1.53820300 |
| O  | 1.85619600  | 1.21183900  | -1.03001200 |
| C  | 3.23180400  | 0.24006300  | 1.00198500  |
| F  | 3.94321700  | 1.36072600  | 1.15644100  |
| F  | 3.96263800  | -0.80063400 | 1.40858900  |
| F  | 2.13407000  | 0.32203400  | 1.78147100  |
| O  | 1.89141600  | -1.24616200 | -0.67447900 |
| C  | -4.29274100 | 2.36897100  | 0.07845900  |
| H  | -4.21176700 | 2.89290200  | -0.88044600 |
| H  | -5.35260800 | 2.19909200  | 0.27707400  |

|   |             |             |             |
|---|-------------|-------------|-------------|
| H | -3.91060200 | 3.04203800  | 0.85402600  |
| C | -5.34652100 | -0.75632500 | 0.51794900  |
| H | -5.67505400 | -1.44480300 | -0.26899500 |
| H | -5.37972400 | -1.30165900 | 1.46810500  |
| H | -6.07604800 | 0.05364500  | 0.57516900  |

### R<sub>3</sub>

|   |             |             |             |
|---|-------------|-------------|-------------|
| S | -1.26824700 | -0.89950400 | -0.09329100 |
| O | -2.31727500 | -1.44116000 | -0.93237000 |
| O | -0.84833100 | -1.50595100 | 1.15855600  |
| C | -1.70854200 | 0.87909300  | 0.27887600  |
| F | -2.90708800 | 0.90233500  | 0.85454200  |
| F | -1.73779200 | 1.58075900  | -0.85416100 |
| F | -0.80204800 | 1.40298000  | 1.10257800  |
| O | 0.00942600  | -0.66826500 | -1.09341400 |
| C | 1.26174600  | -0.30566700 | -0.55043200 |
| C | 2.03526400  | -1.25198500 | 0.11216100  |
| C | 1.70102200  | 0.99524500  | -0.77049400 |
| C | 3.29520500  | -0.87037300 | 0.57387000  |
| H | 1.65095500  | -2.25286100 | 0.26502400  |
| C | 2.96596900  | 1.35898100  | -0.30956400 |
| H | 1.05756500  | 1.69505900  | -1.29120700 |
| C | 3.76120000  | 0.42902100  | 0.36325300  |
| H | 3.91323200  | -1.59320300 | 1.09650200  |
| H | 3.32685600  | 2.36892600  | -0.47528900 |
| H | 4.74395200  | 0.71658900  | 0.72280000  |

### COM<sub>R<sub>3</sub></sub>-Pd(dppp)

|    |             |             |             |
|----|-------------|-------------|-------------|
| P  | 2.61493600  | -0.68567000 | -0.17729400 |
| C  | 2.78077100  | -2.53596500 | -0.27201800 |
| H  | 3.02024600  | -2.74746500 | -1.32071800 |
| H  | 3.64982800  | -2.86193600 | 0.31113900  |
| C  | 1.53342300  | -3.33410500 | 0.15287500  |
| H  | 1.83801000  | -4.38442600 | 0.23329900  |
| H  | 1.22236600  | -3.03951100 | 1.16103700  |
| C  | 0.31937200  | -3.28122500 | -0.79629700 |
| H  | -0.30841900 | -4.15607600 | -0.59738300 |
| H  | 0.64799700  | -3.33863700 | -1.84040100 |
| P  | -0.72873300 | -1.74454000 | -0.62390400 |
| Pd | 0.61451100  | 0.12164400  | -1.06619800 |
| C  | 4.29740200  | -0.14773500 | -0.68821100 |
| C  | 5.39320700  | -0.12314500 | 0.18553800  |
| C  | 4.47522300  | 0.26409600  | -2.01675500 |
| C  | 6.64373500  | 0.29966100  | -0.26482000 |
| H  | 5.26390400  | -0.42186500 | 1.22127400  |
| C  | 5.72824900  | 0.67646000  | -2.46967300 |

|   |             |             |             |
|---|-------------|-------------|-------------|
| H | 3.62086300  | 0.26643700  | -2.68808600 |
| C | 6.81425100  | 0.69716000  | -1.59259900 |
| H | 7.48551600  | 0.32141500  | 0.42129400  |
| H | 5.85472800  | 0.99111500  | -3.50146300 |
| H | 7.78819800  | 1.02857800  | -1.94016500 |
| C | 2.57795200  | -0.32261900 | 1.62294400  |
| C | 2.90798000  | -1.24422200 | 2.62462600  |
| C | 2.07719800  | 0.93698200  | 1.99790900  |
| C | 2.72835800  | -0.92247100 | 3.97205200  |
| H | 3.28964700  | -2.22525900 | 2.36243300  |
| C | 1.90877500  | 1.26090900  | 3.34197800  |
| H | 1.79319600  | 1.64760600  | 1.22631600  |
| C | 2.22673900  | 0.32791900  | 4.33325200  |
| H | 2.97506900  | -1.65226500 | 4.73750900  |
| H | 1.51357900  | 2.23453900  | 3.61574500  |
| H | 2.08102500  | 0.57439700  | 5.38071900  |
| C | -2.15766500 | -2.08142000 | -1.73143400 |
| C | -2.46567000 | -3.33745600 | -2.27311000 |
| C | -2.97845600 | -0.98812800 | -2.05384300 |
| C | -3.57298600 | -3.49706500 | -3.10898500 |
| H | -1.84723300 | -4.19963600 | -2.04848900 |
| C | -4.09282100 | -1.15118000 | -2.87315900 |
| H | -2.73703400 | -0.00812500 | -1.65846700 |
| C | -4.39146300 | -2.40739900 | -3.40613400 |
| H | -3.79630700 | -4.47541400 | -3.52474900 |
| H | -4.72205500 | -0.29578200 | -3.09985600 |
| H | -5.25397400 | -2.53446300 | -4.05348900 |
| C | -1.42643400 | -2.03496500 | 1.05676900  |
| C | -2.54982800 | -2.84223600 | 1.28273600  |
| C | -0.79396900 | -1.42775300 | 2.15080100  |
| C | -3.02784400 | -3.03732900 | 2.57839900  |
| H | -3.06167800 | -3.30437800 | 0.44457400  |
| C | -1.26521700 | -1.63351700 | 3.44734100  |
| H | 0.05599700  | -0.77867300 | 1.98458900  |
| C | -2.38617400 | -2.43612800 | 3.66365700  |
| H | -3.90553600 | -3.65633300 | 2.74083600  |
| H | -0.75794200 | -1.15613600 | 4.28025900  |
| H | -2.76330400 | -2.58788000 | 4.67074800  |
| C | -1.00569800 | 2.76227800  | -1.11100100 |
| C | -0.41417300 | 1.89179900  | -2.06624500 |
| C | -0.29499600 | 3.68802400  | -0.38887200 |
| C | 0.99799700  | 2.00443300  | -2.25498600 |
| H | -1.05392600 | 1.41005500  | -2.79684400 |
| C | 1.10655500  | 3.78041400  | -0.59808400 |
| H | -0.78998000 | 4.34610200  | 0.31069800  |
| C | 1.73772700  | 2.96961500  | -1.51290900 |
| H | 1.45126800  | 1.55527400  | -3.13345200 |
| H | 1.67076900  | 4.51610800  | -0.03389900 |

|   |             |            |             |
|---|-------------|------------|-------------|
| H | 2.80708500  | 3.05073500 | -1.68097700 |
| S | -3.32916500 | 2.89019900 | 0.27302800  |
| O | -2.93301000 | 4.09984800 | 0.97733200  |
| O | -4.69083300 | 2.65434800 | -0.16353100 |
| C | -2.83195600 | 1.44993700 | 1.35652800  |
| F | -3.41820200 | 1.60324600 | 2.54210700  |
| F | -1.50880300 | 1.43093800 | 1.51210200  |
| F | -3.24677400 | 0.32006400 | 0.79486900  |
| O | -2.42105900 | 2.61658700 | -1.04638900 |

**TS5<sub>b</sub>**

|    |             |             |             |
|----|-------------|-------------|-------------|
| P  | -1.66208500 | 1.20703800  | -0.80519200 |
| C  | -1.14746800 | 2.36349200  | -2.16802300 |
| H  | -1.25470800 | 1.79280100  | -3.09673600 |
| H  | -1.87449300 | 3.18046400  | -2.22791900 |
| C  | 0.28032900  | 2.93633400  | -2.06863100 |
| H  | 0.32538700  | 3.80189600  | -2.74007200 |
| H  | 0.46356600  | 3.33145700  | -1.06350900 |
| C  | 1.43083900  | 1.99104600  | -2.46295100 |
| H  | 2.31812300  | 2.59636300  | -2.67650200 |
| H  | 1.17915700  | 1.43976500  | -3.37626200 |
| P  | 1.85130300  | 0.73333800  | -1.15560200 |
| Pd | -0.10166200 | -0.47829200 | -0.48039300 |
| C  | -3.38330000 | 0.80764600  | -1.27233300 |
| C  | -4.48226100 | 1.08592600  | -0.44800900 |
| C  | -3.58834600 | 0.09725400  | -2.46633000 |
| C  | -5.75939600 | 0.66310400  | -0.81314900 |
| H  | -4.33766100 | 1.62922100  | 0.47927700  |
| C  | -4.86765800 | -0.30639900 | -2.83746500 |
| H  | -2.73981900 | -0.16222200 | -3.09295200 |
| C  | -5.95583500 | -0.03382200 | -2.00606800 |
| H  | -6.60313300 | 0.88022300  | -0.16464600 |
| H  | -5.01339000 | -0.85356800 | -3.76413900 |
| H  | -6.95180500 | -0.36190400 | -2.28800200 |
| C  | -1.81834400 | 2.28435000  | 0.67002500  |
| C  | -1.75251800 | 3.68327000  | 0.62963000  |
| C  | -1.91489100 | 1.64768500  | 1.91939000  |
| C  | -1.76211500 | 4.42771000  | 1.81056500  |
| H  | -1.68396100 | 4.20325100  | -0.31914500 |
| C  | -1.94069700 | 2.39180700  | 3.09644200  |
| H  | -1.96079100 | 0.56518100  | 1.95840600  |
| C  | -1.85346900 | 3.78570500  | 3.04539500  |
| H  | -1.69697100 | 5.51063100  | 1.76344700  |
| H  | -2.01601700 | 1.88401900  | 4.05325400  |
| H  | -1.85813100 | 4.36659600  | 3.96269600  |
| C  | 3.29419300  | -0.16101500 | -1.84746500 |
| C  | 4.12223000  | 0.34237100  | -2.86184200 |
| C  | 3.55938000  | -1.43716800 | -1.32345400 |

|   |             |             |             |
|---|-------------|-------------|-------------|
| C | 5.19931100  | -0.40948000 | -3.33321100 |
| H | 3.93263400  | 1.32083800  | -3.29100000 |
| C | 4.64166900  | -2.18147300 | -1.78871200 |
| H | 2.91864600  | -1.85022600 | -0.55216600 |
| C | 5.46318300  | -1.66978000 | -2.79511700 |
| H | 5.83148900  | -0.00997100 | -4.12092200 |
| H | 4.83315600  | -3.16451600 | -1.36990700 |
| H | 6.30144900  | -2.25337000 | -3.16377600 |
| C | 2.56171900  | 1.81839100  | 0.14686800  |
| C | 3.86307500  | 2.33496300  | 0.08160300  |
| C | 1.73838000  | 2.17473700  | 1.22522800  |
| C | 4.32441700  | 3.20373000  | 1.07008100  |
| H | 4.51894100  | 2.04797800  | -0.73454200 |
| C | 2.19574000  | 3.05568900  | 2.20498900  |
| H | 0.74066600  | 1.75805100  | 1.29656800  |
| C | 3.49010100  | 3.57131500  | 2.12889500  |
| H | 5.33662900  | 3.59382300  | 1.01524100  |
| H | 1.53878500  | 3.33015400  | 3.02480600  |
| H | 3.85251700  | 4.25077600  | 2.89470500  |
| C | -1.45324900 | -2.14007700 | 0.06028000  |
| C | -1.94760200 | -2.72344900 | -1.11720800 |
| C | -2.26314900 | -1.99282300 | 1.19683300  |
| C | -3.31657600 | -2.95639100 | -1.21588000 |
| H | -1.27121400 | -2.94371000 | -1.93561400 |
| C | -3.62720200 | -2.23203500 | 1.06225500  |
| H | -1.84475600 | -1.66100000 | 2.13628700  |
| C | -4.16908000 | -2.70387000 | -0.13804200 |
| H | -3.71634000 | -3.34967700 | -2.14599900 |
| H | -4.27322000 | -2.05513300 | 1.91766900  |
| H | -5.23395500 | -2.88628700 | -0.22559900 |
| S | 0.78509400  | -3.21659700 | 1.60243400  |
| O | -0.21010400 | -3.80300300 | 2.48830800  |
| O | 2.00861900  | -3.92322100 | 1.24424200  |
| C | 1.36512300  | -1.66594000 | 2.46765800  |
| F | 1.87448800  | -2.00604200 | 3.65059500  |
| F | 0.34528800  | -0.81298800 | 2.66717000  |
| F | 2.30568000  | -1.04891900 | 1.74660600  |
| O | 0.15494000  | -2.65825300 | 0.27061000  |

6<sub>b</sub>

|   |             |            |             |
|---|-------------|------------|-------------|
| P | -1.61536200 | 0.96194300 | -1.01760400 |
| C | -1.16814200 | 2.04152300 | -2.46047500 |
| H | -1.13876700 | 1.36343600 | -3.32117300 |
| H | -1.99227700 | 2.73765200 | -2.64828100 |
| C | 0.15829300  | 2.81057600 | -2.35191300 |
| H | 0.21273700  | 3.49424100 | -3.20719100 |
| H | 0.16625500  | 3.44115000 | -1.45812200 |
| C | 1.43025700  | 1.95281400 | -2.37340300 |

|    |             |             |             |
|----|-------------|-------------|-------------|
| H  | 2.30058700  | 2.58771400  | -2.56784100 |
| H  | 1.37703300  | 1.22131400  | -3.18628400 |
| P  | 1.78045600  | 1.00698300  | -0.81669900 |
| C  | -3.27069300 | 0.35436700  | -1.50753800 |
| C  | -4.36571100 | 1.23244000  | -1.54243900 |
| C  | -3.44386300 | -0.99032700 | -1.85991200 |
| C  | -5.61785400 | 0.77094500  | -1.93931400 |
| H  | -4.24253400 | 2.26877900  | -1.24207700 |
| C  | -4.70413800 | -1.44642100 | -2.25164600 |
| H  | -2.61221100 | -1.68058300 | -1.78817200 |
| C  | -5.78775800 | -0.57049900 | -2.29447600 |
| H  | -6.46279000 | 1.45289000  | -1.96201700 |
| H  | -4.83400800 | -2.49423000 | -2.50281300 |
| H  | -6.76777800 | -0.93127000 | -2.59257700 |
| C  | -1.98895300 | 2.15193100  | 0.33181000  |
| C  | -2.01372400 | 3.54185800  | 0.15803500  |
| C  | -2.25141600 | 1.62680000  | 1.60739400  |
| C  | -2.26935000 | 4.38897000  | 1.23778400  |
| H  | -1.83860100 | 3.98031300  | -0.81696100 |
| C  | -2.52162700 | 2.47262500  | 2.68014800  |
| H  | -2.24275200 | 0.55627100  | 1.76125300  |
| C  | -2.52130100 | 3.85785300  | 2.50148200  |
| H  | -2.27480300 | 5.46416400  | 1.08628700  |
| H  | -2.72787500 | 2.04778700  | 3.65796600  |
| H  | -2.72120400 | 4.51749900  | 3.34039700  |
| C  | 3.51608200  | 0.49047400  | -1.03660000 |
| C  | 3.99735500  | 0.11262000  | -2.29664000 |
| C  | 4.34121900  | 0.34986500  | 0.08715300  |
| C  | 5.28828500  | -0.39690200 | -2.43055200 |
| H  | 3.36684200  | 0.19288200  | -3.17575400 |
| C  | 5.62533200  | -0.16927900 | -0.04983500 |
| H  | 3.96787200  | 0.61551300  | 1.06914400  |
| C  | 6.10195900  | -0.54325000 | -1.30749600 |
| H  | 5.65235600  | -0.68854200 | -3.41089300 |
| H  | 6.25012900  | -0.29204700 | 0.82896900  |
| H  | 7.10181000  | -0.95346100 | -1.41019000 |
| C  | 1.82985200  | 2.27542600  | 0.49010700  |
| C  | 2.59689700  | 3.44155500  | 0.34223300  |
| C  | 1.06446900  | 2.09344600  | 1.64746400  |
| C  | 2.57785100  | 4.41916900  | 1.33370400  |
| H  | 3.21368000  | 3.58082000  | -0.54073900 |
| C  | 1.04865300  | 3.07342300  | 2.63993600  |
| H  | 0.47277000  | 1.19170700  | 1.75612600  |
| C  | 1.79989100  | 4.23695000  | 2.48113100  |
| H  | 3.16948700  | 5.32167100  | 1.21443200  |
| H  | 0.43722300  | 2.93032300  | 3.52395500  |
| H  | 1.78366000  | 5.00308500  | 3.25033000  |
| Pd | 0.21974000  | -0.58688000 | -0.46091500 |

|   |             |             |             |
|---|-------------|-------------|-------------|
| C | 2.48525300  | -2.53667000 | -0.68934900 |
| C | 1.76989700  | -1.71856000 | 0.18325100  |
| C | 2.09516900  | -1.69064300 | 1.53982400  |
| C | 3.13797500  | -2.48597000 | 2.02323000  |
| C | 3.86013200  | -3.29979200 | 1.15106800  |
| C | 3.52865600  | -3.32768000 | -0.20478000 |
| H | 2.24083600  | -2.55716500 | -1.74715600 |
| H | 3.38150600  | -2.46870900 | 3.08233200  |
| H | 4.67459200  | -3.91303300 | 1.52557800  |
| H | 4.08312400  | -3.96504700 | -0.88814300 |
| H | 1.53671700  | -1.06416800 | 2.22839700  |
| S | -1.38409700 | -3.38131800 | 0.51305300  |
| O | -2.51764000 | -4.19540200 | 0.06879900  |
| O | -0.23485300 | -4.02955000 | 1.14219700  |
| C | -2.08847500 | -2.30185200 | 1.84833200  |
| F | -2.53377100 | -3.02661900 | 2.87539000  |
| F | -3.10729900 | -1.55720100 | 1.37555300  |
| F | -1.14976500 | -1.44162800 | 2.32020800  |
| O | -1.03473500 | -2.33441700 | -0.53820600 |

**TS6<sub>b</sub>**

|   |             |             |             |
|---|-------------|-------------|-------------|
| P | -1.01803400 | 1.78545500  | -0.30159100 |
| C | -1.08821200 | 1.60244600  | -2.13787100 |
| H | -1.73999400 | 0.73717900  | -2.28545700 |
| H | -1.60450800 | 2.48181500  | -2.53842400 |
| C | 0.24871300  | 1.38488800  | -2.87290100 |
| H | 0.05137800  | 1.52218900  | -3.94226100 |
| H | 0.97376400  | 2.15883200  | -2.59785800 |
| C | 0.88492300  | -0.00404700 | -2.69758400 |
| H | 1.68142100  | -0.14594900 | -3.43483000 |
| H | 0.13660500  | -0.78693700 | -2.83269400 |
| P | 1.59743200  | -0.25345900 | -1.01233200 |
| C | -2.75437900 | 2.10868600  | 0.15155000  |
| C | -3.33216600 | 3.37058400  | -0.05521400 |
| C | -3.52579500 | 1.05789200  | 0.66386000  |
| C | -4.67664500 | 3.57623500  | 0.24566800  |
| H | -2.73074900 | 4.19022300  | -0.43731700 |
| C | -4.87437900 | 1.27081400  | 0.95252800  |
| H | -3.08230800 | 0.08116400  | 0.82790600  |
| C | -5.44910400 | 2.52496400  | 0.74745900  |
| H | -5.12110500 | 4.55505700  | 0.09173000  |
| H | -5.47062200 | 0.44965200  | 1.33738000  |
| H | -6.49745700 | 2.68742500  | 0.97990200  |
| C | -0.14659000 | 3.36138700  | 0.02664000  |
| C | 0.18160000  | 4.28382000  | -0.97404300 |
| C | 0.24086600  | 3.62714800  | 1.35009900  |
| C | 0.90212200  | 5.43860800  | -0.66198500 |



|    |             |             |             |
|----|-------------|-------------|-------------|
| H  | -0.11545100 | 4.10689400  | -2.00136800 |
| C  | 0.94704700  | 4.78535900  | 1.66294300  |
| H  | -0.00335700 | 2.91039100  | 2.12914800  |
| C  | 1.28822100  | 5.69030100  | 0.65352600  |
| H  | 1.16085300  | 6.13970600  | -1.44955800 |
| H  | 1.23779400  | 4.97936100  | 2.69097000  |
| H  | 1.85009700  | 6.58771600  | 0.89372000  |
| C  | 2.35674400  | -1.90871600 | -1.04298800 |
| C  | 1.54462800  | -3.00363600 | -1.37751600 |
| C  | 3.67350600  | -2.12492200 | -0.61559900 |
| C  | 2.05649600  | -4.29687900 | -1.30270100 |
| H  | 0.50705600  | -2.85971400 | -1.65277300 |
| C  | 4.17850400  | -3.42316200 | -0.54574200 |
| H  | 4.29848500  | -1.28523600 | -0.33228000 |
| C  | 3.37368900  | -4.50950400 | -0.89180400 |
| H  | 1.41117900  | -5.13389300 | -1.54896300 |
| H  | 5.20029000  | -3.58445700 | -0.21488900 |
| H  | 3.76906200  | -5.51924000 | -0.83055600 |
| C  | 2.97322300  | 0.94847000  | -0.96277600 |
| C  | 3.96687800  | 0.98046900  | -1.95407300 |
| C  | 2.99087500  | 1.91214100  | 0.05282700  |
| C  | 4.95154900  | 1.96591100  | -1.92910300 |
| H  | 3.97438900  | 0.23001500  | -2.73893700 |
| C  | 3.96977500  | 2.90590400  | 0.07155000  |
| H  | 2.22178100  | 1.88874400  | 0.81568100  |
| C  | 4.94986000  | 2.93376300  | -0.92004300 |
| H  | 5.71788600  | 1.98339300  | -2.69819400 |
| H  | 3.95391900  | 3.65959100  | 0.85218000  |
| H  | 5.71274500  | 3.70649800  | -0.91025600 |
| Pd | 0.05772600  | 0.02767300  | 0.78843600  |
| C  | 0.69444100  | -2.71132700 | 1.97233400  |
| C  | 0.89374500  | -1.35194500 | 2.24093100  |
| C  | 2.08206900  | -0.90334100 | 2.83555700  |
| C  | 3.08692300  | -1.81907700 | 3.13967300  |
| C  | 2.89877100  | -3.17529600 | 2.85802300  |
| C  | 1.70627900  | -3.61892100 | 2.28454900  |
| H  | -0.22594500 | -3.04721200 | 1.51111300  |
| H  | 4.01455100  | -1.47735900 | 3.58942400  |
| H  | 3.68665500  | -3.88721100 | 3.08511900  |
| H  | 1.56810000  | -4.67027800 | 2.05536700  |
| H  | 2.21999000  | 0.15196800  | 3.05178600  |
| C  | -0.60941100 | -0.27097600 | 2.55992400  |
| O  | -1.19300400 | -0.23876300 | 3.56518200  |
| S  | -2.08502700 | -2.40986700 | -0.50678000 |
| O  | -1.50614400 | -3.75907900 | -0.63517000 |
| O  | -2.23801600 | -1.91499300 | 0.88789700  |
| C  | -3.83829900 | -2.56951700 | -1.09328400 |
| F  | -4.51763600 | -3.42790000 | -0.32383500 |

|                |             |             |             |
|----------------|-------------|-------------|-------------|
| F              | -3.87116700 | -3.00737700 | -2.35945100 |
| F              | -4.45453300 | -1.37427100 | -1.04334500 |
| O              | -1.51673900 | -1.39348500 | -1.44069800 |
| 7 <sub>b</sub> |             |             |             |
| P              | -2.06316300 | -0.46486700 | -0.36291600 |
| C              | -1.80047100 | -0.63850800 | -2.17484000 |
| H              | -1.21189400 | -1.55598000 | -2.28531600 |
| H              | -2.77469100 | -0.82917000 | -2.63816300 |
| C              | -1.09673600 | 0.54571900  | -2.85913200 |
| H              | -1.18470700 | 0.39189200  | -3.94023000 |
| H              | -1.61284700 | 1.48766000  | -2.64222400 |
| C              | 0.39808800  | 0.69455600  | -2.54184100 |
| H              | 0.85356300  | 1.39579700  | -3.24875400 |
| H              | 0.92073500  | -0.25768500 | -2.65018000 |
| P              | 0.76935100  | 1.36337400  | -0.85816900 |
| C              | -2.78170200 | -2.05885900 | 0.15009300  |
| C              | -4.16367000 | -2.28947500 | 0.14645400  |
| C              | -1.90047600 | -3.08162600 | 0.53198400  |
| C              | -4.65927300 | -3.53720900 | 0.52406700  |
| H              | -4.84775100 | -1.49701600 | -0.14067100 |
| C              | -2.40298000 | -4.32925400 | 0.89472900  |
| H              | -0.83191700 | -2.90550200 | 0.52598700  |
| C              | -3.78029400 | -4.55712600 | 0.89509300  |
| H              | -5.73083700 | -3.71297300 | 0.52741900  |
| H              | -1.71187500 | -5.11955600 | 1.16952500  |
| H              | -4.17005800 | -5.52856100 | 1.18419600  |
| C              | -3.38965900 | 0.77505300  | -0.14341200 |
| C              | -4.06460500 | 1.37128600  | -1.21546800 |
| C              | -3.68477100 | 1.19932100  | 1.16316200  |
| C              | -4.99958000 | 2.38338000  | -0.98866500 |
| H              | -3.86134300 | 1.05863500  | -2.23298800 |
| C              | -4.62550000 | 2.19987900  | 1.38970400  |
| H              | -3.16624800 | 0.74914100  | 2.00399600  |
| C              | -5.27978600 | 2.80192400  | 0.31094600  |
| H              | -5.50687400 | 2.84355500  | -1.83096500 |
| H              | -4.84354800 | 2.51505500  | 2.40554000  |
| H              | -6.00493500 | 3.59079700  | 0.48541700  |
| C              | 2.57211300  | 1.59590100  | -0.86181600 |
| C              | 3.40104000  | 0.58280900  | -1.36597300 |
| C              | 3.13758400  | 2.72569300  | -0.25422300 |
| C              | 4.78579700  | 0.71807500  | -1.27214000 |
| H              | 2.98813600  | -0.32149400 | -1.79899700 |
| C              | 4.52144300  | 2.84639200  | -0.16045600 |
| H              | 2.49954800  | 3.49600600  | 0.16303000  |
| C              | 5.34821500  | 1.84408100  | -0.67100700 |
| H              | 5.42107900  | -0.07082400 | -1.66267500 |
| H              | 4.95234300  | 3.71883100  | 0.32084700  |

|    |             |             |             |
|----|-------------|-------------|-------------|
| H  | 6.42731100  | 1.93826100  | -0.59272600 |
| C  | 0.03034200  | 3.03280600  | -0.91214600 |
| C  | 0.45678100  | 3.98542500  | -1.85068200 |
| C  | -1.03649900 | 3.34014400  | -0.05895100 |
| C  | -0.18261800 | 5.22020100  | -1.93423900 |
| H  | 1.29533900  | 3.76449900  | -2.50407500 |
| C  | -1.68358300 | 4.57269200  | -0.15134800 |
| H  | -1.36453700 | 2.60503700  | 0.66723600  |
| C  | -1.25714500 | 5.51279100  | -1.08891200 |
| H  | 0.15445100  | 5.95438000  | -2.65965900 |
| H  | -2.52115700 | 4.78806500  | 0.50433500  |
| H  | -1.75734900 | 6.47378000  | -1.16260600 |
| Pd | -0.13864800 | 0.12930000  | 0.93670200  |
| C  | 2.68332900  | 0.00543100  | 1.91754000  |
| C  | 1.52318000  | 0.78053800  | 1.97972200  |
| C  | 1.51517900  | 1.98348000  | 2.68657300  |
| C  | 2.68175600  | 2.42492700  | 3.32154000  |
| C  | 3.84619100  | 1.66055200  | 3.25351600  |
| C  | 3.84382100  | 0.45174600  | 2.55354100  |
| H  | 2.69010200  | -0.91608300 | 1.34364800  |
| H  | 2.67720900  | 3.36719400  | 3.86343500  |
| H  | 4.75366500  | 2.00607300  | 3.74019300  |
| H  | 4.75111300  | -0.14232900 | 2.49042700  |
| H  | 0.61646800  | 2.59278700  | 2.73024900  |
| C  | -0.73121800 | -0.59790700 | 2.64028000  |
| O  | -1.06346500 | -0.98133600 | 3.66365300  |
| S  | 1.32875600  | -2.73652100 | -1.43199100 |
| O  | 0.07547400  | -3.29460700 | -1.98006700 |
| O  | 2.35394500  | -2.34166100 | -2.41916900 |
| C  | 2.07397000  | -4.13220400 | -0.46627400 |
| F  | 2.38466200  | -5.16502500 | -1.25576400 |
| F  | 1.19998000  | -4.55712300 | 0.46855900  |
| F  | 3.18589400  | -3.71982400 | 0.16176200  |
| O  | 1.12179200  | -1.72482000 | -0.35078700 |

**COM**<sub>3-7a</sub>

|   |            |             |             |
|---|------------|-------------|-------------|
| P | 1.31831100 | -2.23604100 | -0.54495400 |
| C | 1.15376400 | -3.28824800 | 0.98167500  |
| H | 0.17038300 | -3.07405000 | 1.41499000  |
| H | 1.15187300 | -4.33565200 | 0.66493200  |
| C | 2.24606100 | -3.09178400 | 2.03822000  |
| H | 2.18982500 | -3.93464400 | 2.73615300  |
| H | 3.23777000 | -3.15099600 | 1.57436500  |
| C | 2.11012800 | -1.79710000 | 2.85054200  |
| H | 2.61491300 | -1.88743000 | 3.81659000  |
| H | 1.05732000 | -1.58900300 | 3.06575700  |
| P | 2.78028400 | -0.30617500 | 1.99261800  |

|    |             |             |             |
|----|-------------|-------------|-------------|
| C  | -0.20071500 | -2.70932000 | -1.46690400 |
| C  | -0.53566300 | -1.99279400 | -2.62673300 |
| C  | -1.03317300 | -3.76306600 | -1.05782100 |
| C  | -1.67239300 | -2.33227100 | -3.35845000 |
| H  | 0.08788300  | -1.16267300 | -2.94125700 |
| C  | -2.18017000 | -4.08621000 | -1.78453000 |
| H  | -0.81145800 | -4.33151000 | -0.16280800 |
| C  | -2.50241200 | -3.37182000 | -2.93805400 |
| H  | -1.92063600 | -1.77127100 | -4.25323200 |
| H  | -2.82640700 | -4.88669200 | -1.43987100 |
| H  | -3.40058300 | -3.61644600 | -3.49666600 |
| C  | 2.66000400  | -3.10961300 | -1.43721700 |
| C  | 2.51006900  | -4.42127000 | -1.90957100 |
| C  | 3.87966300  | -2.44748400 | -1.61638700 |
| C  | 3.57535100  | -5.06522000 | -2.53466200 |
| H  | 1.55541200  | -4.92918000 | -1.80387900 |
| C  | 4.94792300  | -3.09706300 | -2.23561500 |
| H  | 3.98078500  | -1.42063700 | -1.28356800 |
| C  | 4.79833300  | -4.40563300 | -2.69291500 |
| H  | 3.45330800  | -6.07951200 | -2.90257700 |
| H  | 5.89085500  | -2.57473500 | -2.36378000 |
| H  | 5.62697800  | -4.91008200 | -3.18075400 |
| C  | 2.60344900  | 0.99832800  | 3.25886700  |
| C  | 1.32635800  | 1.28216600  | 3.76727200  |
| C  | 3.68982600  | 1.79516100  | 3.64198500  |
| C  | 1.14550700  | 2.33418700  | 4.66151600  |
| H  | 0.46615400  | 0.70533500  | 3.44196600  |
| C  | 3.50186700  | 2.85178300  | 4.53420200  |
| H  | 4.67520300  | 1.59859700  | 3.23414200  |
| C  | 2.23333400  | 3.12111200  | 5.04648000  |
| H  | 0.15178100  | 2.55311900  | 5.03777200  |
| H  | 4.34899700  | 3.46670900  | 4.82355500  |
| H  | 2.08857800  | 3.94860300  | 5.73458500  |
| C  | 4.57999500  | -0.62729800 | 1.86732300  |
| C  | 5.26844800  | -1.39095900 | 2.82106900  |
| C  | 5.28552400  | -0.09840600 | 0.77463300  |
| C  | 6.63343800  | -1.63732800 | 2.67574100  |
| H  | 4.74487900  | -1.79992400 | 3.67879700  |
| C  | 6.65227200  | -0.34157700 | 0.63762400  |
| H  | 4.76988700  | 0.52492600  | 0.05345800  |
| C  | 7.32628700  | -1.11610200 | 1.58142100  |
| H  | 7.15448700  | -2.23686100 | 3.41579000  |
| H  | 7.18696500  | 0.07703000  | -0.20940400 |
| H  | 8.38891400  | -1.31085800 | 1.46930400  |
| Pd | 1.94268500  | 0.11794000  | -0.12457100 |
| C  | 1.57401400  | 4.09937500  | 1.43946400  |
| C  | 1.28856700  | 2.85909900  | 0.84993700  |
| C  | -0.00522100 | 2.32952900  | 0.93772900  |

|    |             |             |             |
|----|-------------|-------------|-------------|
| C  | -0.99319300 | 3.01952200  | 1.63432100  |
| C  | -0.70203700 | 4.24547800  | 2.23438300  |
| C  | 0.58008900  | 4.79187700  | 2.12516800  |
| H  | 2.58764200  | 4.47951700  | 1.37406900  |
| H  | -1.98439600 | 2.59138300  | 1.70627100  |
| H  | -1.47392400 | 4.77625000  | 2.78447300  |
| H  | 0.80655900  | 5.74548900  | 2.59265200  |
| I  | 1.78446300  | 1.04226600  | -2.67845200 |
| H  | -0.24012000 | 1.38136800  | 0.46140100  |
| Cu | -2.45053400 | 1.69304100  | -1.34856100 |
| B  | -4.10056200 | -1.80262500 | 0.66491200  |
| C  | -3.31033600 | 0.54821000  | -0.00169800 |
| C  | -1.10608700 | 4.87763300  | -1.35536500 |
| O  | -3.86474700 | -1.73380400 | 2.02219800  |
| O  | -5.13757000 | -2.66121100 | 0.35751500  |
| C  | -1.59856600 | 2.82744100  | -2.68315100 |
| N  | -1.05671300 | 4.06972100  | -2.56515600 |
| N  | -1.33343000 | 2.47681900  | -3.97059800 |
| C  | -0.42889500 | 4.46365000  | -3.73644300 |
| C  | -0.60186900 | 3.45272800  | -4.62617700 |
| C  | -5.00354700 | -2.33254800 | 2.68562000  |
| C  | -5.54882400 | -3.31329600 | 1.58539900  |
| C  | -1.68905400 | 1.19186200  | -4.55111100 |
| H  | 0.07384900  | 5.41273600  | -3.83163800 |
| H  | -0.27654200 | 3.34557800  | -5.64786800 |
| H  | -2.31760100 | 0.66413900  | -3.83337200 |
| H  | -0.78714500 | 0.60430200  | -4.73745600 |
| H  | -2.24314600 | 1.33854300  | -5.48168400 |
| H  | -1.78709500 | 4.40168700  | -0.65530100 |
| H  | -1.47250900 | 5.87932600  | -1.59411100 |
| H  | -0.11775300 | 4.94878700  | -0.89171800 |
| C  | -4.68361000 | 1.08655200  | 0.24109600  |
| C  | -5.82916000 | 0.56513700  | -0.39168200 |
| C  | -7.10606200 | 1.06686500  | -0.12930700 |
| C  | -7.29547100 | 2.10910800  | 0.77865200  |
| C  | -4.90412500 | 2.14699300  | 1.15304300  |
| C  | -6.17334400 | 2.64622600  | 1.41904400  |
| H  | -5.72455200 | -0.26075300 | -1.08645400 |
| H  | -6.29332000 | 3.45239000  | 2.13927600  |
| H  | -2.74504900 | 0.67637800  | 0.93143600  |
| H  | -7.96174400 | 0.62734300  | -0.63671700 |
| H  | -8.28989300 | 2.49170600  | 0.98788400  |
| H  | -4.05072700 | 2.57845900  | 1.67005800  |
| C  | -5.97162500 | -1.18688700 | 3.01147200  |
| H  | -6.83724900 | -1.53754900 | 3.58236100  |
| H  | -5.43929400 | -0.44116000 | 3.60779600  |
| H  | -6.32059400 | -0.69155500 | 2.10254400  |
| C  | -4.52214100 | -3.00482400 | 3.96551300  |

|   |             |             |             |
|---|-------------|-------------|-------------|
| H | -4.12618200 | -2.24636600 | 4.64663100  |
| H | -5.34604900 | -3.51883000 | 4.47187500  |
| H | -3.72978400 | -3.72924600 | 3.76550300  |
| C | -7.06628700 | -3.47619500 | 1.56522900  |
| H | -7.35346900 | -4.16644800 | 0.76656700  |
| H | -7.42869100 | -3.88488300 | 2.51472400  |
| H | -7.56047000 | -2.52124000 | 1.38203400  |
| C | -4.86039300 | -4.68394600 | 1.60519100  |
| H | -5.16339900 | -5.28210200 | 2.46985500  |
| H | -5.13464400 | -5.22554000 | 0.69567400  |
| H | -3.77210200 | -4.57191600 | 1.61994200  |
| C | -3.30079800 | -0.95101600 | -0.37405800 |
| H | -3.70845800 | -1.12926300 | -1.37573700 |
| H | -2.27634400 | -1.32648000 | -0.43629500 |
| C | 2.42309000  | 2.06815700  | 0.27491200  |
| O | 3.54372900  | 2.51869300  | 0.18238800  |

### TS7

|   |             |             |             |
|---|-------------|-------------|-------------|
| P | 1.22174900  | -1.13323800 | 1.74484100  |
| C | 1.25758700  | -0.05570100 | 3.27006700  |
| H | 0.32633000  | 0.52015200  | 3.29011200  |
| H | 1.26344600  | -0.69065600 | 4.16088200  |
| C | 2.46548800  | 0.89508600  | 3.33088900  |
| H | 2.51477600  | 1.29572400  | 4.35047600  |
| H | 3.38641500  | 0.32507500  | 3.18371600  |
| C | 2.43537600  | 2.10210800  | 2.38189200  |
| H | 3.24621300  | 2.79209700  | 2.63899400  |
| H | 1.49737400  | 2.64835600  | 2.52657800  |
| P | 2.50480900  | 1.75077600  | 0.56409600  |
| C | 0.25247300  | -2.59773700 | 2.29642200  |
| C | 0.46417200  | -3.80454500 | 1.60662200  |
| C | -0.61266400 | -2.58641700 | 3.39701600  |
| C | -0.13475400 | -4.98162500 | 2.04701300  |
| H | 1.11567100  | -3.81930600 | 0.73842400  |
| C | -1.21963800 | -3.76828900 | 3.83089400  |
| H | -0.81258200 | -1.66291200 | 3.92911400  |
| C | -0.96810500 | -4.96980800 | 3.16938400  |
| H | 0.05164700  | -5.90902700 | 1.51417100  |
| H | -1.87973700 | -3.74719600 | 4.69306300  |
| H | -1.42638200 | -5.89036800 | 3.51851900  |
| C | 2.89430000  | -1.90299900 | 1.83719300  |
| C | 3.40466500  | -2.35753800 | 3.06551600  |
| C | 3.65102000  | -2.07811700 | 0.67786800  |
| C | 4.66396100  | -2.94632600 | 3.13067200  |
| H | 2.81528100  | -2.26319400 | 3.97249500  |
| C | 4.90862400  | -2.68231300 | 0.74287600  |
| H | 3.24719100  | -1.76183800 | -0.27517700 |
| C | 5.42116500  | -3.10689700 | 1.96584100  |

|    |             |             |             |
|----|-------------|-------------|-------------|
| H  | 5.05193100  | -3.28797200 | 4.08596700  |
| H  | 5.48346400  | -2.80747100 | -0.16827700 |
| H  | 6.40289800  | -3.56892000 | 2.01651700  |
| C  | 2.65009500  | 3.44380600  | -0.14991000 |
| C  | 2.24106800  | 4.58887000  | 0.54648400  |
| C  | 3.08753800  | 3.58094800  | -1.47595800 |
| C  | 2.25937900  | 5.83937000  | -0.07033200 |
| H  | 1.88084000  | 4.51852600  | 1.56499000  |
| C  | 3.10772000  | 4.83058100  | -2.08858800 |
| H  | 3.39170700  | 2.70881200  | -2.04091200 |
| C  | 2.68953200  | 5.96413100  | -1.39003300 |
| H  | 1.92380700  | 6.71229900  | 0.48095100  |
| H  | 3.44134100  | 4.91477300  | -3.11828300 |
| H  | 2.69426700  | 6.93654600  | -1.87309300 |
| C  | 4.17058800  | 1.07915000  | 0.22228100  |
| C  | 5.23256600  | 1.14660600  | 1.13204600  |
| C  | 4.37778500  | 0.50530000  | -1.04113800 |
| C  | 6.48476100  | 0.64081200  | 0.78415100  |
| H  | 5.09292900  | 1.58930500  | 2.11238700  |
| C  | 5.63714100  | 0.02520300  | -1.39354300 |
| H  | 3.54342600  | 0.39173100  | -1.72737500 |
| C  | 6.69103100  | 0.08710300  | -0.48035300 |
| H  | 7.29977800  | 0.68266200  | 1.50050400  |
| H  | 5.78192600  | -0.42161500 | -2.37226200 |
| H  | 7.66840300  | -0.30308400 | -0.74851000 |
| Pd | 0.61780000  | 0.44102600  | -0.06595700 |
| C  | -0.60321600 | 4.19557100  | -1.96873800 |
| C  | -0.38597200 | 3.19905100  | -1.00731100 |
| C  | -0.76053300 | 3.43609500  | 0.31907600  |
| C  | -1.34537800 | 4.64613500  | 0.68425800  |
| C  | -1.55972600 | 5.63358600  | -0.27834300 |
| C  | -1.18704300 | 5.40579300  | -1.60701200 |
| H  | -0.29110500 | 3.99905400  | -2.98852500 |
| H  | -1.64039600 | 4.80958500  | 1.71562500  |
| H  | -2.01613400 | 6.57848800  | 0.00324300  |
| H  | -1.34780800 | 6.17605900  | -2.35571400 |
| I  | 1.64009200  | -1.79092100 | -2.45961000 |
| H  | -0.58783600 | 2.66707000  | 1.06385300  |
| Cu | -0.61452700 | -1.73637300 | -1.04197900 |
| B  | -3.42511700 | 0.80857600  | 1.74673400  |
| C  | -1.71837300 | 0.25394400  | -0.03949900 |
| C  | -1.62684400 | -3.19059600 | -3.90855900 |
| O  | -3.32723500 | 2.18165300  | 1.81330000  |
| O  | -4.71674400 | 0.36518600  | 1.89609600  |
| C  | -1.95607200 | -3.20156200 | -1.42198500 |
| N  | -2.28173000 | -3.61976300 | -2.67875900 |
| N  | -2.86332300 | -3.84721900 | -0.63280200 |
| C  | -3.36786900 | -4.47989600 | -2.67167100 |

|   |             |             |             |
|---|-------------|-------------|-------------|
| C | -3.73784100 | -4.62508300 | -1.37557400 |
| C | -4.66668000 | 2.70481900  | 1.60417800  |
| C | -5.56204300 | 1.52561600  | 2.13184800  |
| C | -2.98935400 | -3.66769200 | 0.80003700  |
| H | -3.76649800 | -4.91053600 | -3.57628800 |
| H | -4.52351500 | -5.20679100 | -0.92039900 |
| H | -2.10440200 | -3.15254500 | 1.15791000  |
| H | -3.05691300 | -4.63666700 | 1.29668300  |
| H | -3.87686200 | -3.07348500 | 1.03533200  |
| H | -0.70641100 | -2.66819400 | -3.65320500 |
| H | -2.28620200 | -2.51902400 | -4.46171400 |
| H | -1.38594400 | -4.06632300 | -4.51701700 |
| C | -2.64495400 | -0.13659200 | -1.15734600 |
| C | -3.88088200 | -0.78088100 | -0.93913200 |
| C | -4.74458000 | -1.07912200 | -1.99230400 |
| C | -4.41471200 | -0.73500000 | -3.30336000 |
| C | -2.32926200 | 0.20147300  | -2.49236300 |
| C | -3.20060100 | -0.08510500 | -3.53990600 |
| H | -4.18185100 | -1.04529300 | 0.06469100  |
| H | -2.91830700 | 0.19228600  | -4.55213300 |
| H | -1.68293100 | 1.33593300  | -0.09246500 |
| H | -5.68368400 | -1.58414500 | -1.78130200 |
| H | -5.08941800 | -0.96476700 | -4.12285500 |
| H | -1.37491700 | 0.66035500  | -2.71199500 |
| C | -4.80494100 | 2.94640600  | 0.09655400  |
| H | -5.77125400 | 3.39499500  | -0.15201100 |
| H | -4.01160800 | 3.62691800  | -0.22195800 |
| H | -4.69393400 | 2.01514900  | -0.46537900 |
| C | -4.81014700 | 4.01539400  | 2.36714600  |
| H | -4.14701200 | 4.76487000  | 1.92779300  |
| H | -5.83648500 | 4.39081200  | 2.30137700  |
| H | -4.54683400 | 3.89982900  | 3.41997500  |
| C | -6.86704900 | 1.32397600  | 1.37116600  |
| H | -7.41792300 | 0.48245800  | 1.80066400  |
| H | -7.49918800 | 2.21524100  | 1.43980500  |
| H | -6.67778700 | 1.10557700  | 0.31928900  |
| C | -5.81681200 | 1.58816100  | 3.63946500  |
| H | -6.50553200 | 2.39720600  | 3.89921400  |
| H | -6.25734000 | 0.64167500  | 3.96380600  |
| H | -4.88273000 | 1.73486500  | 4.18838600  |
| C | -2.18617800 | -0.08548000 | 1.39574100  |
| H | -2.38438400 | -1.14791700 | 1.53202300  |
| H | -1.37432000 | 0.16619200  | 2.08361500  |
| C | 0.29215300  | 1.92097800  | -1.43732300 |
| O | 0.72116500  | 1.80858600  | -2.56642800 |

8'

|   |            |             |            |
|---|------------|-------------|------------|
| P | 0.90183600 | -0.80579000 | 1.89859700 |
|---|------------|-------------|------------|



|   |             |             |             |
|---|-------------|-------------|-------------|
| C | 0.58576600  | 0.43258200  | 3.27523000  |
| H | -0.43000400 | 0.81247700  | 3.12477400  |
| H | 0.58780200  | -0.10988200 | 4.22558400  |
| C | 1.57443200  | 1.60169600  | 3.38041600  |
| H | 1.37036100  | 2.10709900  | 4.33264000  |
| H | 2.58606100  | 1.19921400  | 3.46289400  |
| C | 1.52110200  | 2.67925700  | 2.28643400  |
| H | 2.19282700  | 3.49708000  | 2.56700600  |
| H | 0.51231700  | 3.09872300  | 2.22921800  |
| P | 1.90782900  | 2.12742500  | 0.55908900  |
| C | 0.28470100  | -2.34175400 | 2.72450800  |
| C | 0.98958000  | -3.54545100 | 2.56381600  |
| C | -0.85116600 | -2.33307400 | 3.54709200  |
| C | 0.59088000  | -4.69743200 | 3.23916600  |
| H | 1.86648700  | -3.57363800 | 1.92702200  |
| C | -1.25755000 | -3.49117400 | 4.21217300  |
| H | -1.42215100 | -1.42141000 | 3.68122000  |
| C | -0.53096100 | -4.67402600 | 4.07147600  |
| H | 1.16024200  | -5.61406300 | 3.11634200  |
| H | -2.13531400 | -3.46237300 | 4.85104400  |
| H | -0.83762000 | -5.57021900 | 4.60238700  |
| C | 2.70282600  | -1.12523900 | 2.04422400  |
| C | 3.31783300  | -1.28221200 | 3.29782800  |
| C | 3.46871200  | -1.26390800 | 0.88391100  |
| C | 4.68139900  | -1.54603900 | 3.38370300  |
| H | 2.72830600  | -1.20993700 | 4.20696700  |
| C | 4.83313300  | -1.54823400 | 0.97204800  |
| H | 3.00597100  | -1.13901600 | -0.08908200 |
| C | 5.44214500  | -1.67881200 | 2.21739600  |
| H | 5.15136900  | -1.65411000 | 4.35693300  |
| H | 5.41467500  | -1.63731100 | 0.06100600  |
| H | 6.50672000  | -1.88236000 | 2.28504000  |
| C | 1.79837300  | 3.68961700  | -0.40736300 |
| C | 1.56510200  | 4.94005300  | 0.17781100  |
| C | 1.93264900  | 3.60242200  | -1.80181600 |
| C | 1.46459700  | 6.08284900  | -0.61544200 |
| H | 1.44020300  | 5.03565800  | 1.24948000  |
| C | 1.84242900  | 4.74737200  | -2.58908500 |
| H | 2.05953800  | 2.63568400  | -2.27684300 |
| C | 1.60626100  | 5.99058600  | -1.99946000 |
| H | 1.26917600  | 7.04362700  | -0.14855400 |
| H | 1.93744900  | 4.66171300  | -3.66717200 |
| H | 1.52365300  | 6.88049600  | -2.61649200 |
| C | 3.73754500  | 1.88133100  | 0.56772100  |
| C | 4.52993700  | 2.07143900  | 1.70771900  |
| C | 4.36412100  | 1.51901400  | -0.63394000 |
| C | 5.91187400  | 1.88706800  | 1.65106400  |
| H | 4.08709000  | 2.36723400  | 2.65019500  |

|    |             |             |             |
|----|-------------|-------------|-------------|
| C  | 5.74502100  | 1.35155800  | -0.69190800 |
| H  | 3.76963000  | 1.33057500  | -1.51906400 |
| C  | 6.52504700  | 1.52903700  | 0.45161700  |
| H  | 6.50687200  | 2.02818100  | 2.54860800  |
| H  | 6.20701500  | 1.06788100  | -1.63278900 |
| H  | 7.60099600  | 1.38753500  | 0.40916900  |
| Pd | 0.08995900  | 0.54579400  | 0.00132500  |
| C  | -1.57760600 | 4.31940800  | -1.37990300 |
| C  | -1.32918500 | 3.17756200  | -0.60657100 |
| C  | -1.69001700 | 3.17018000  | 0.74268300  |
| C  | -2.28523800 | 4.28908500  | 1.32253800  |
| C  | -2.51097100 | 5.43197300  | 0.55270700  |
| C  | -2.15665500 | 5.44414500  | -0.80065700 |
| H  | -1.28544800 | 4.30654300  | -2.42359500 |
| H  | -2.58607000 | 4.26222700  | 2.36538200  |
| H  | -2.96564400 | 6.30993700  | 1.00312400  |
| H  | -2.32845500 | 6.33464100  | -1.39839000 |
| I  | 2.09446000  | -0.66756100 | -2.69008400 |
| H  | -1.51835400 | 2.27018200  | 1.32099900  |
| Cu | 0.38756900  | -1.97377400 | -1.18467600 |
| B  | -4.04731400 | 0.18203800  | 1.15128200  |
| C  | -1.99254200 | -0.10255500 | -0.22869600 |
| C  | 1.17858400  | -4.32865000 | -3.30137300 |
| O  | -4.25886600 | 1.50823700  | 1.45938700  |
| O  | -5.18029300 | -0.44031700 | 0.68744900  |
| C  | -0.08754500 | -3.90909800 | -1.18592000 |
| N  | 0.31350500  | -4.73225400 | -2.19945400 |
| N  | -0.95016700 | -4.68528200 | -0.47227700 |
| C  | -0.29710700 | -5.97241900 | -2.12709500 |
| C  | -1.09499100 | -5.94447500 | -1.03012400 |
| C  | -5.51438500 | 1.88852600  | 0.83562800  |
| C  | -6.27536900 | 0.51482100  | 0.78127900  |
| C  | -1.68622200 | -4.26011200 | 0.70440500  |
| H  | -0.10755300 | -6.75204400 | -2.84746500 |
| H  | -1.73669500 | -6.69560600 | -0.59826700 |
| H  | -1.41861100 | -3.23103100 | 0.91566500  |
| H  | -1.42494300 | -4.88259200 | 1.55968000  |
| H  | -2.75833300 | -4.31911300 | 0.51214700  |
| H  | 1.86283500  | -3.55405000 | -2.95873000 |
| H  | 0.58031600  | -3.91720300 | -4.11855400 |
| H  | 1.73872300  | -5.19813400 | -3.65268300 |
| C  | -2.25661500 | -1.12669600 | -1.30305900 |
| C  | -3.16967700 | -2.18499900 | -1.13925100 |
| C  | -3.38478500 | -3.12289400 | -2.14955100 |
| C  | -2.71112200 | -3.02565500 | -3.36709800 |
| C  | -1.62793400 | -1.00952600 | -2.56414900 |
| C  | -1.84656700 | -1.94930700 | -3.57250500 |
| H  | -3.73951800 | -2.26777600 | -0.22304800 |

|   |             |             |             |
|---|-------------|-------------|-------------|
| H | -1.32349200 | -1.83364000 | -4.51752900 |
| H | -2.45546200 | 0.82385400  | -0.57577100 |
| H | -4.09121100 | -3.93264300 | -1.98312100 |
| H | -2.87573300 | -3.76203900 | -4.14850400 |
| H | -0.96259700 | -0.17689600 | -2.75177500 |
| C | -5.16829600 | 2.43958200  | -0.55234200 |
| H | -6.05987000 | 2.80119500  | -1.07261500 |
| H | -4.46603100 | 3.26868300  | -0.44252500 |
| H | -4.69153700 | 1.67489800  | -1.17171000 |
| C | -6.17287600 | 2.96828600  | 1.68418400  |
| H | -5.54806100 | 3.86545900  | 1.67174800  |
| H | -7.15661800 | 3.23138100  | 1.28229600  |
| H | -6.29168400 | 2.64907600  | 2.72095700  |
| C | -7.17985400 | 0.32660000  | -0.42990400 |
| H | -7.65054700 | -0.65954700 | -0.38869100 |
| H | -7.97174700 | 1.08250400  | -0.44260900 |
| H | -6.61500900 | 0.39294100  | -1.36050700 |
| C | -7.03165400 | 0.19647300  | 2.07341700  |
| H | -7.91826700 | 0.82706100  | 2.18568800  |
| H | -7.35070000 | -0.84881300 | 2.04979000  |
| H | -6.38983800 | 0.33810300  | 2.94719800  |
| C | -2.60315600 | -0.41792500 | 1.16559400  |
| H | -2.55171900 | -1.48425700 | 1.39097000  |
| H | -2.03383000 | 0.09876800  | 1.94200100  |
| C | -0.65406700 | 1.99175600  | -1.25197600 |
| O | -0.54876100 | 1.94521300  | -2.46072800 |

## 8

|   |             |             |            |
|---|-------------|-------------|------------|
| P | 0.04428500  | -1.59878700 | 1.49657000 |
| C | 1.19952000  | -1.91130800 | 2.93529100 |
| H | 1.15416400  | -1.02223900 | 3.57414100 |
| H | 0.79250900  | -2.74059700 | 3.52151300 |
| C | 2.65679400  | -2.22081900 | 2.55763000 |
| H | 3.14998500  | -2.63416200 | 3.44580800 |
| H | 2.67581800  | -3.01438600 | 1.80454900 |
| C | 3.49367900  | -1.02288200 | 2.08620000 |
| H | 4.54741000  | -1.30695300 | 1.99358400 |
| H | 3.45526200  | -0.22734500 | 2.83830100 |
| P | 2.94501500  | -0.22191200 | 0.50715100 |
| C | -1.56979300 | -1.83223800 | 2.33599300 |
| C | -2.50769300 | -2.78030800 | 1.90732400 |
| C | -1.90312600 | -0.97792600 | 3.39878500 |
| C | -3.75331100 | -2.86967200 | 2.52935300 |
| H | -2.26814300 | -3.43675800 | 1.07897000 |
| C | -3.14403900 | -1.07548800 | 4.02450800 |
| H | -1.19812700 | -0.21797700 | 3.72501100 |
| C | -4.07481700 | -2.01998900 | 3.58752700 |
| H | -4.47513800 | -3.60246200 | 2.18099500 |

|    |             |             |             |
|----|-------------|-------------|-------------|
| H  | -3.38959800 | -0.40548000 | 4.84292200  |
| H  | -5.04711800 | -2.08766600 | 4.06574400  |
| C  | 0.25442500  | -3.11740400 | 0.49664900  |
| C  | 0.37166500  | -4.39144600 | 1.07592600  |
| C  | 0.32853900  | -2.98880400 | -0.89457900 |
| C  | 0.57786600  | -5.51214800 | 0.27473700  |
| H  | 0.29595000  | -4.50977200 | 2.15275300  |
| C  | 0.52830800  | -4.11269500 | -1.69598700 |
| H  | 0.22505300  | -2.01097000 | -1.34742800 |
| C  | 0.66059300  | -5.37192700 | -1.11399400 |
| H  | 0.67233100  | -6.49346100 | 0.73054900  |
| H  | 0.58368500  | -3.99325800 | -2.77224700 |
| H  | 0.82366600  | -6.24626300 | -1.73745100 |
| C  | 4.15763800  | 1.14070600  | 0.35072400  |
| C  | 4.16182000  | 2.13733500  | 1.33968200  |
| C  | 4.99258000  | 1.28088300  | -0.76319000 |
| C  | 4.99652500  | 3.24455100  | 1.22442400  |
| H  | 3.48028600  | 2.07077800  | 2.18195700  |
| C  | 5.82165700  | 2.39773800  | -0.88097900 |
| H  | 4.98574100  | 0.52722500  | -1.54260300 |
| C  | 5.82757500  | 3.37855900  | 0.11025000  |
| H  | 4.97300600  | 4.01671600  | 1.98641800  |
| H  | 6.46111500  | 2.50035900  | -1.75271200 |
| H  | 6.46755800  | 4.25005400  | 0.01063400  |
| C  | 3.35683700  | -1.40160500 | -0.82733000 |
| C  | 4.10078000  | -2.57032900 | -0.62496600 |
| C  | 2.82809100  | -1.13392700 | -2.10297000 |
| C  | 4.30181900  | -3.46849300 | -1.67400400 |
| H  | 4.52242400  | -2.79365800 | 0.34885800  |
| C  | 3.05306900  | -2.02271000 | -3.15162000 |
| H  | 2.24032000  | -0.23447300 | -2.26640100 |
| C  | 3.78033200  | -3.19595200 | -2.93838700 |
| H  | 4.86643800  | -4.37980800 | -1.50132000 |
| H  | 2.64228200  | -1.80509900 | -4.13299700 |
| H  | 3.93721300  | -3.89642900 | -3.75332600 |
| Pd | 0.67116400  | 0.39114300  | 0.24604900  |
| C  | 1.29457200  | 1.98763000  | -0.86169300 |
| O  | 1.57157300  | 1.89242400  | -2.05181500 |
| C  | 1.52018600  | 3.28911900  | -0.14726400 |
| C  | 1.05591200  | 3.47283600  | 1.15921900  |
| C  | 2.26508100  | 4.30050000  | -0.76650900 |
| C  | 1.33652900  | 4.65272900  | 1.84602600  |
| H  | 0.48499700  | 2.67029800  | 1.61961900  |
| C  | 2.55744600  | 5.47404300  | -0.07824900 |
| H  | 2.62255200  | 4.12902000  | -1.77620500 |
| C  | 2.09420600  | 5.65159600  | 1.22926800  |
| H  | 0.96916900  | 4.79558800  | 2.85836500  |
| H  | 3.15082600  | 6.25039000  | -0.55293200 |

|   |             |             |             |
|---|-------------|-------------|-------------|
| H | 2.32235500  | 6.56849800  | 1.76572000  |
| B | -3.67997600 | 1.64048400  | 0.12751100  |
| C | -1.26839400 | 1.06616900  | -0.42234700 |
| O | -3.95808000 | 2.55940300  | -0.85702600 |
| O | -4.77118900 | 0.87159400  | 0.45984900  |
| C | -5.23776600 | 2.19892500  | -1.43821600 |
| C | -5.91408100 | 1.37358400  | -0.27916300 |
| C | -1.65837500 | -0.04366400 | -1.33483400 |
| C | -2.57513700 | -1.04950900 | -0.97152800 |
| C | -2.88634200 | -2.09434600 | -1.84346100 |
| C | -2.29764600 | -2.16808000 | -3.10534900 |
| C | -1.08222600 | -0.12547900 | -2.62299700 |
| C | -1.39350600 | -1.16960200 | -3.48789300 |
| H | -3.06123000 | -1.00897200 | -0.00618600 |
| H | -0.93178800 | -1.20423600 | -4.47158700 |
| H | -1.11541400 | 1.96267100  | -1.02273300 |
| H | -3.59696200 | -2.85469700 | -1.52891600 |
| H | -2.54093900 | -2.98148600 | -3.78230500 |
| H | -0.36616100 | 0.63427100  | -2.92002800 |
| C | -4.93198200 | 1.35967700  | -2.68376000 |
| H | -5.84533900 | 1.10171800  | -3.22817000 |
| H | -4.28618300 | 1.94210300  | -3.34576200 |
| H | -4.40047600 | 0.44100000  | -2.42648300 |
| C | -5.97177500 | 3.47614500  | -1.83010200 |
| H | -5.41446200 | 3.98943800  | -2.61835900 |
| H | -6.97124900 | 3.24682200  | -2.21404100 |
| H | -6.06873200 | 4.15921100  | -0.98481300 |
| C | -6.74212600 | 0.18034900  | -0.74369500 |
| H | -7.15177600 | -0.34230600 | 0.12539200  |
| H | -7.57766900 | 0.50632100  | -1.37158500 |
| H | -6.13128900 | -0.52553200 | -1.30832900 |
| C | -6.71921900 | 2.24059100  | 0.69249600  |
| H | -7.63882100 | 2.61621900  | 0.23443500  |
| H | -6.98648200 | 1.63863700  | 1.56519200  |
| H | -6.12731800 | 3.09276200  | 1.03708700  |
| C | -2.24269000 | 1.41532900  | 0.71720000  |
| H | -2.28076100 | 0.64331600  | 1.48762700  |
| H | -1.88252900 | 2.32968300  | 1.20423700  |

## TS8

|   |             |             |            |
|---|-------------|-------------|------------|
| P | -1.11618200 | -1.39477700 | 1.43472600 |
| C | -0.39868500 | -2.53273800 | 2.72142000 |
| H | -0.14270600 | -1.88172900 | 3.56552600 |
| H | -1.18304400 | -3.20608100 | 3.08490300 |
| C | 0.83540700  | -3.34550600 | 2.29405400 |
| H | 1.00556100  | -4.10867200 | 3.06286900 |
| H | 0.63068000  | -3.89185800 | 1.36744400 |
| C | 2.14101400  | -2.54731500 | 2.13891300 |

|    |             |             |             |
|----|-------------|-------------|-------------|
| H  | 2.99484100  | -3.23214900 | 2.17593200  |
| H  | 2.25048900  | -1.84703800 | 2.97426400  |
| P  | 2.24208200  | -1.56651900 | 0.56271000  |
| C  | -2.57785000 | -0.77087700 | 2.35941300  |
| C  | -3.64847200 | -1.60122500 | 2.71952100  |
| C  | -2.60033500 | 0.57635200  | 2.73726100  |
| C  | -4.71716600 | -1.09391700 | 3.45685800  |
| H  | -3.65432200 | -2.64093200 | 2.40557800  |
| C  | -3.66665000 | 1.08383700  | 3.48149900  |
| H  | -1.78665400 | 1.22745900  | 2.43521200  |
| C  | -4.72613200 | 0.24977800  | 3.84151900  |
| H  | -5.54530100 | -1.74272000 | 3.72671800  |
| H  | -3.67273600 | 2.13038700  | 3.77112700  |
| H  | -5.55977400 | 0.64539100  | 4.41392500  |
| C  | -1.84273200 | -2.53965900 | 0.19382000  |
| C  | -1.99423600 | -3.91866700 | 0.38488100  |
| C  | -2.19285300 | -1.98660600 | -1.04951800 |
| C  | -2.47467200 | -4.73075000 | -0.64481000 |
| H  | -1.72914200 | -4.37501100 | 1.33230100  |
| C  | -2.68105200 | -2.79589900 | -2.07275900 |
| H  | -2.07674100 | -0.91943900 | -1.20325800 |
| C  | -2.81698700 | -4.17259100 | -1.87544300 |
| H  | -2.57538800 | -5.80004600 | -0.48411800 |
| H  | -2.94039900 | -2.35515800 | -3.03068600 |
| H  | -3.18301500 | -4.80547200 | -2.67826500 |
| C  | 3.99462100  | -1.05896100 | 0.49011300  |
| C  | 4.78340600  | -0.90763600 | 1.63803800  |
| C  | 4.51753800  | -0.67085000 | -0.75429400 |
| C  | 6.07364100  | -0.38411300 | 1.54311400  |
| H  | 4.39734000  | -1.18871900 | 2.61226400  |
| C  | 5.80345200  | -0.14879700 | -0.84459600 |
| H  | 3.90193600  | -0.75271300 | -1.64434700 |
| C  | 6.58488000  | -0.00161600 | 0.30391400  |
| H  | 6.67580900  | -0.27171200 | 2.44009100  |
| H  | 6.18725600  | 0.16620900  | -1.80938600 |
| H  | 7.58417600  | 0.41689200  | 0.23241600  |
| C  | 2.12634300  | -2.87933200 | -0.71221600 |
| C  | 2.97868900  | -3.99379800 | -0.70402100 |
| C  | 1.12563600  | -2.78514700 | -1.68649900 |
| C  | 2.81251700  | -5.01027500 | -1.64179800 |
| H  | 3.77585900  | -4.06081700 | 0.03099500  |
| C  | 0.95822700  | -3.80590100 | -2.62319700 |
| H  | 0.49435400  | -1.90507000 | -1.71069400 |
| C  | 1.79608000  | -4.92000100 | -2.59808500 |
| H  | 3.47360600  | -5.87197200 | -1.62960000 |
| H  | 0.16984600  | -3.72728500 | -3.36468700 |
| H  | 1.66530400  | -5.71634700 | -3.32508100 |
| Pd | 0.51375800  | -0.03315600 | 0.29792400  |

|   |             |             |             |
|---|-------------|-------------|-------------|
| C | 1.41781800  | 1.10751000  | -1.16714900 |
| O | 1.24041400  | 0.63876300  | -2.29577700 |
| C | 2.65268400  | 1.89537900  | -0.86157200 |
| C | 3.08549000  | 2.12745500  | 0.44725300  |
| C | 3.39708500  | 2.40783200  | -1.93132200 |
| C | 4.24235200  | 2.86091900  | 0.68639100  |
| H | 2.50768900  | 1.71994000  | 1.26928000  |
| C | 4.55305800  | 3.14703400  | -1.69427700 |
| H | 3.04914400  | 2.20910100  | -2.93964300 |
| C | 4.97818400  | 3.37512500  | -0.38376600 |
| H | 4.57241800  | 3.03213900  | 1.70632500  |
| H | 5.12437900  | 3.54500500  | -2.52851800 |
| H | 5.88017400  | 3.95070700  | -0.19595200 |
| B | -2.61170400 | 1.91112900  | -1.63799700 |
| C | -0.29920100 | 2.12200500  | -0.49240400 |
| O | -3.16440100 | 1.21615400  | -0.58116000 |
| O | -3.55714400 | 2.31115900  | -2.55294700 |
| C | -4.61011700 | 1.34802700  | -0.67956900 |
| C | -4.80548200 | 1.65536200  | -2.20621500 |
| C | 0.26190200  | 3.36859100  | 0.07583300  |
| C | 0.77069600  | 4.41047500  | -0.71769100 |
| C | 1.35160700  | 5.53697500  | -0.14048100 |
| C | 1.43838300  | 5.66044100  | 1.24730200  |
| C | 0.35282400  | 3.51365100  | 1.47178300  |
| C | 0.93042300  | 4.63856400  | 2.05238500  |
| H | 0.74235400  | 4.32176000  | -1.79864900 |
| H | 0.98795400  | 4.71745900  | 3.13488200  |
| H | -0.92881500 | 1.66899500  | 0.28292100  |
| H | 1.75085600  | 6.31904400  | -0.78035300 |
| H | 1.89661200  | 6.53758700  | 1.69414500  |
| H | -0.00972600 | 2.70612900  | 2.10448000  |
| C | -5.00393100 | 2.51963400  | 0.22374200  |
| H | -6.08891400 | 2.65513600  | 0.25476000  |
| H | -4.65122600 | 2.31269200  | 1.23585200  |
| H | -4.54458600 | 3.45129100  | -0.11763700 |
| C | -5.26151900 | 0.06004000  | -0.19279500 |
| H | -5.09129300 | -0.05925500 | 0.87826500  |
| H | -6.34253400 | 0.09115600  | -0.36577900 |
| H | -4.85010500 | -0.81449500 | -0.69853000 |
| C | -5.95940500 | 2.59528300  | -2.53280800 |
| H | -6.00370400 | 2.76123200  | -3.61267500 |
| H | -6.91316200 | 2.16153100  | -2.21502800 |
| H | -5.83523700 | 3.56375900  | -2.04670200 |
| C | -4.89148300 | 0.38933100  | -3.06426400 |
| H | -5.84109900 | -0.13367600 | -2.92028100 |
| H | -4.80235100 | 0.66876200  | -4.11710900 |
| H | -4.07878400 | -0.29965800 | -2.82322600 |
| C | -1.07901600 | 2.15559600  | -1.79946100 |

|                      |             |             |             |
|----------------------|-------------|-------------|-------------|
| H                    | -0.91560000 | 3.09228900  | -2.34302300 |
| H                    | -0.68194700 | 1.37820700  | -2.47432600 |
| <b>P<sub>1</sub></b> |             |             |             |
| P                    | -0.73022700 | -1.45610000 | -1.33741500 |
| C                    | -1.40033200 | -0.96896300 | -3.00616000 |
| H                    | -0.63986800 | -0.31203600 | -3.44177500 |
| H                    | -1.43440000 | -1.85998500 | -3.64294600 |
| C                    | -2.76563500 | -0.25551100 | -3.03103800 |
| H                    | -3.11233900 | -0.26579700 | -4.07132500 |
| H                    | -3.50656300 | -0.82726600 | -2.46330500 |
| C                    | -2.78520400 | 1.21114800  | -2.55628600 |
| H                    | -3.68241300 | 1.70704400  | -2.94292700 |
| H                    | -1.91580200 | 1.74328300  | -2.95811500 |
| P                    | -2.75029100 | 1.37887000  | -0.69925300 |
| C                    | 0.89999200  | -2.15603200 | -1.83023700 |
| C                    | 1.28989800  | -3.46906900 | -1.53257100 |
| C                    | 1.83503600  | -1.29719800 | -2.43496000 |
| C                    | 2.57572300  | -3.91283300 | -1.84598700 |
| H                    | 0.59218300  | -4.14534900 | -1.05315700 |
| C                    | 3.11921900  | -1.73974900 | -2.74244100 |
| H                    | 1.57765300  | -0.26203300 | -2.63878300 |
| C                    | 3.49293300  | -3.05360000 | -2.45236200 |
| H                    | 2.86147600  | -4.93273500 | -1.60617800 |
| H                    | 3.83001300  | -1.04464800 | -3.17580000 |
| H                    | 4.49601600  | -3.39969900 | -2.68299500 |
| C                    | -1.72766100 | -2.90966900 | -0.84107900 |
| C                    | -2.79930900 | -3.41231200 | -1.59015800 |
| C                    | -1.46599200 | -3.45850400 | 0.42781700  |
| C                    | -3.60979100 | -4.42598300 | -1.07575900 |
| H                    | -3.01852800 | -3.01465700 | -2.57408800 |
| C                    | -2.26618200 | -4.48311000 | 0.92861700  |
| H                    | -0.63291800 | -3.08224300 | 1.01572800  |
| C                    | -3.34855800 | -4.96159500 | 0.18490800  |
| H                    | -4.44546900 | -4.79530400 | -1.66291000 |
| H                    | -2.04852300 | -4.90223600 | 1.90678400  |
| H                    | -3.98051500 | -5.74931700 | 0.58441900  |
| C                    | -3.20551100 | 3.13186700  | -0.42944600 |
| C                    | -2.79861900 | 4.14951500  | -1.30483600 |
| C                    | -3.87216200 | 3.48843900  | 0.75616900  |
| C                    | -3.05961400 | 5.48806500  | -1.00834800 |
| H                    | -2.27516600 | 3.90236800  | -2.22314200 |
| C                    | -4.13129200 | 4.82503200  | 1.04941100  |
| H                    | -4.19311200 | 2.71092800  | 1.44182200  |
| C                    | -3.72640500 | 5.83094600  | 0.16810000  |
| H                    | -2.74343800 | 6.26314500  | -1.70060100 |
| H                    | -4.65420800 | 5.08293200  | 1.96595200  |
| H                    | -3.92982700 | 6.87259600  | 0.39703400  |



|    |             |             |             |
|----|-------------|-------------|-------------|
| C  | -4.30198200 | 0.49337400  | -0.25594400 |
| C  | -5.56100200 | 0.94360500  | -0.68248600 |
| C  | -4.21424000 | -0.70653700 | 0.46225900  |
| C  | -6.70651100 | 0.20107500  | -0.40293300 |
| H  | -5.64394600 | 1.88135900  | -1.22449200 |
| C  | -5.36050100 | -1.45533100 | 0.73294400  |
| H  | -3.24363900 | -1.04978500 | 0.80370500  |
| C  | -6.60672600 | -1.00351300 | 0.30029900  |
| H  | -7.67709900 | 0.55849500  | -0.73486400 |
| H  | -5.27014100 | -2.39168400 | 1.27462700  |
| H  | -7.50061800 | -1.58374400 | 0.51051900  |
| Pd | -0.97187400 | 0.24231600  | 0.27253300  |
| C  | 1.01949100  | -0.89120700 | 2.03271400  |
| O  | 1.15100500  | -2.11407400 | 1.97398900  |
| C  | -0.28313800 | -0.29460500 | 2.43795300  |
| C  | -0.58439800 | 1.10346400  | 2.40008000  |
| C  | -1.25404100 | -1.16017400 | 3.02978800  |
| C  | -1.77590900 | 1.59029700  | 2.99937700  |
| H  | 0.18050000  | 1.82283500  | 2.12910500  |
| C  | -2.41744900 | -0.66620400 | 3.57595800  |
| H  | -1.02012100 | -2.21640100 | 3.07299300  |
| C  | -2.68532200 | 0.72365700  | 3.56657500  |
| H  | -1.96482600 | 2.65904900  | 2.98419200  |
| H  | -3.12699800 | -1.34722500 | 4.03670500  |
| H  | -3.60069900 | 1.10222400  | 4.01117000  |
| B  | 3.42957300  | 1.39370800  | -0.13249600 |
| C  | 2.22528100  | 0.03853700  | 1.75604400  |
| O  | 4.24827800  | 2.17135400  | 0.64504700  |
| O  | 3.87885300  | 1.26626000  | -1.42697500 |
| C  | 5.48774000  | 2.35671600  | -0.09436900 |
| C  | 5.01909700  | 2.15428300  | -1.58117200 |
| C  | 3.52706100  | -0.72851100 | 1.86868400  |
| C  | 3.87196200  | -1.68586500 | 0.90499400  |
| C  | 5.08796500  | -2.36169200 | 0.98113500  |
| C  | 5.97612000  | -2.09896300 | 2.02715800  |
| C  | 4.42011000  | -0.47402700 | 2.91229600  |
| C  | 5.63625800  | -1.15448200 | 2.99607500  |
| H  | 3.18544200  | -1.90834200 | 0.09947300  |
| H  | 6.31946000  | -0.94110300 | 3.81330900  |
| H  | 2.22429000  | 0.82483100  | 2.51900300  |
| H  | 5.33548300  | -3.09899400 | 0.22283000  |
| H  | 6.92394000  | -2.62624700 | 2.08672300  |
| H  | 4.16543500  | 0.27292400  | 3.65947300  |
| C  | 6.45160800  | 1.26830300  | 0.38488800  |
| H  | 7.43607300  | 1.37268200  | -0.08073300 |
| H  | 6.56662700  | 1.34972300  | 1.46740300  |
| H  | 6.06205700  | 0.26997400  | 0.17417400  |
| C  | 6.04180000  | 3.73937000  | 0.22516700  |

|   |            |             |             |
|---|------------|-------------|-------------|
| H | 6.31266600 | 3.78741400  | 1.28324400  |
| H | 6.94160400 | 3.94147700  | -0.36502400 |
| H | 5.30924200 | 4.52340100  | 0.02703500  |
| C | 6.03628500 | 1.47412700  | -2.48942200 |
| H | 5.61695100 | 1.36461400  | -3.49388000 |
| H | 6.95015100 | 2.07170300  | -2.56758300 |
| H | 6.29639400 | 0.48199900  | -2.11790500 |
| C | 4.49280600 | 3.43722500  | -2.22980300 |
| H | 5.30080900 | 4.14155700  | -2.44717300 |
| H | 3.99540100 | 3.18090700  | -3.16905900 |
| H | 3.76353700 | 3.93190900  | -1.58266400 |
| C | 2.11149600 | 0.70594000  | 0.35953300  |
| H | 1.84756700 | -0.05755600 | -0.37083300 |
| H | 1.28482800 | 1.42961600  | 0.33745300  |

**COM<sub>3-6a</sub>**

|   |             |             |             |
|---|-------------|-------------|-------------|
| P | -1.90703400 | 0.46694400  | -1.82808800 |
| C | -0.69981700 | 1.39816500  | -2.88210400 |
| H | 0.16830200  | 0.74735700  | -2.99718800 |
| H | -1.12343200 | 1.51918400  | -3.88336400 |
| C | -0.23954100 | 2.74942500  | -2.31515500 |
| H | 0.27715300  | 3.28561300  | -3.11953300 |
| H | -1.10121500 | 3.36837000  | -2.04281500 |
| C | 0.73239500  | 2.64864600  | -1.13092200 |
| H | 1.21840100  | 3.61637100  | -0.97051000 |
| H | 1.52652700  | 1.92839100  | -1.34221200 |
| P | -0.06440000 | 2.18422800  | 0.47722000  |
| C | -2.18897100 | -1.03172600 | -2.84725000 |
| C | -3.48078400 | -1.52514700 | -3.07065600 |
| C | -1.09162500 | -1.72509200 | -3.38054100 |
| C | -3.67200800 | -2.67624000 | -3.83525800 |
| H | -4.33650100 | -1.00923600 | -2.65145400 |
| C | -1.28868100 | -2.86369200 | -4.16110600 |
| H | -0.07959200 | -1.39392900 | -3.18145800 |
| C | -2.57928400 | -3.34275600 | -4.39187000 |
| H | -4.67902100 | -3.04718800 | -4.00096400 |
| H | -0.42998100 | -3.38161000 | -4.57826500 |
| H | -2.73165400 | -4.23127800 | -4.99720000 |
| C | -3.45767200 | 1.44435400  | -2.00271600 |
| C | -3.61684500 | 2.44319900  | -2.97365200 |
| C | -4.50237400 | 1.21754000  | -1.09219000 |
| C | -4.78241700 | 3.20846000  | -3.02231500 |
| H | -2.83424400 | 2.64157900  | -3.69604500 |
| C | -5.67274300 | 1.97254100  | -1.15289800 |
| H | -4.38982800 | 0.45025200  | -0.33247400 |
| C | -5.81312900 | 2.97728300  | -2.11160700 |
| H | -4.88268500 | 3.98553100  | -3.77423100 |

|    |             |             |             |
|----|-------------|-------------|-------------|
| H  | -6.47054500 | 1.77775500  | -0.44223500 |
| H  | -6.71911400 | 3.57476700  | -2.15040600 |
| C  | 1.26482600  | 2.49124200  | 1.69308400  |
| C  | 2.61528700  | 2.31080600  | 1.36366100  |
| C  | 0.91669000  | 2.87570700  | 2.99742600  |
| C  | 3.59879400  | 2.51931300  | 2.33339000  |
| H  | 2.91598400  | 1.98613300  | 0.37412200  |
| C  | 1.90251200  | 3.06951600  | 3.95919700  |
| H  | -0.12508900 | 2.99842900  | 3.26535500  |
| C  | 3.24827800  | 2.89360300  | 3.62916000  |
| H  | 4.64220700  | 2.37278800  | 2.07338800  |
| H  | 1.61694800  | 3.34804000  | 4.96871100  |
| H  | 4.01813900  | 3.04302800  | 4.38045200  |
| C  | -1.21372100 | 3.58791600  | 0.74361900  |
| C  | -0.73755000 | 4.90491500  | 0.83392700  |
| C  | -2.59233500 | 3.35306200  | 0.78693700  |
| C  | -1.63212000 | 5.96640100  | 0.94972300  |
| H  | 0.33149700  | 5.09562100  | 0.82724300  |
| C  | -3.48836600 | 4.41727200  | 0.89238400  |
| H  | -2.95592400 | 2.33374100  | 0.73116600  |
| C  | -3.00916700 | 5.72410200  | 0.97236000  |
| H  | -1.25739700 | 6.98314000  | 1.02155900  |
| H  | -4.55524300 | 4.21858400  | 0.90333400  |
| H  | -3.70365900 | 6.55485000  | 1.05600900  |
| Pd | -1.31190000 | 0.22938100  | 0.49430300  |
| C  | 0.23148800  | -0.42640400 | 2.95934100  |
| C  | -0.92751900 | 0.19879800  | 2.49539700  |
| C  | -1.77311600 | 0.82594900  | 3.41619200  |
| C  | -1.45218800 | 0.83737200  | 4.77803100  |
| C  | -0.28364300 | 0.22327800  | 5.23328200  |
| C  | 0.55616900  | -0.41413800 | 4.31809400  |
| H  | 0.89186200  | -0.91592000 | 2.25375400  |
| H  | -2.11877500 | 1.32841900  | 5.48288200  |
| H  | -0.03149700 | 0.24093700  | 6.28983400  |
| H  | 1.47283800  | -0.89302100 | 4.65434300  |
| I  | -3.16758700 | -1.71007000 | 0.95931400  |
| H  | -2.68689200 | 1.30596900  | 3.07968600  |
| Cu | 0.71813300  | -2.36168500 | 0.00731800  |
| B  | 3.69143600  | -0.00661100 | -2.20071800 |
| C  | 2.08866300  | -1.02319500 | -0.47900500 |
| C  | 0.75083700  | -3.80751600 | 3.00071600  |
| O  | 3.90983200  | 1.16769700  | -1.50202000 |
| O  | 4.74034900  | -0.31693000 | -3.03032100 |
| C  | -0.25508200 | -3.89412500 | 0.72134000  |
| N  | -0.15356600 | -4.35522100 | 1.99835300  |
| N  | -1.20938800 | -4.68412500 | 0.16260300  |
| C  | -1.05665900 | -5.37658200 | 2.24231100  |
| C  | -1.72756900 | -5.58228300 | 1.07918900  |

|   |             |             |             |
|---|-------------|-------------|-------------|
| C | 5.31953900  | 1.49430400  | -1.64213900 |
| C | 5.67264900  | 0.79834300  | -3.00399900 |
| C | -1.71888100 | -4.50433200 | -1.18604500 |
| H | -1.13382500 | -5.86367900 | 3.20097800  |
| H | -2.50896600 | -6.28042000 | 0.82582300  |
| H | -0.99423100 | -3.92315800 | -1.74966400 |
| H | -2.66121800 | -3.95260700 | -1.16186900 |
| H | -1.85880300 | -5.47702100 | -1.66431900 |
| H | 1.16462700  | -4.62241600 | 3.59975800  |
| H | 0.22478600  | -3.09991300 | 3.64459000  |
| H | 1.56481100  | -3.28858600 | 2.49329300  |
| C | 3.26536400  | -1.48669700 | 0.30965400  |
| C | 4.19126100  | -2.42379300 | -0.20296400 |
| C | 5.28870400  | -2.85316800 | 0.54328900  |
| C | 5.51020000  | -2.36721900 | 1.83395900  |
| C | 3.51597300  | -1.00558600 | 1.61497600  |
| C | 4.60863300  | -1.43747000 | 2.36100800  |
| H | 4.04857000  | -2.81928100 | -1.20363000 |
| H | 4.76749000  | -1.02744000 | 3.35570700  |
| H | 1.77037100  | -0.05560800 | -0.08105700 |
| H | 5.97968000  | -3.57136000 | 0.10832900  |
| H | 6.36763900  | -2.69899600 | 2.41167200  |
| H | 2.85329400  | -0.25864600 | 2.03404500  |
| C | 6.04474500  | 0.86713700  | -0.44767000 |
| H | 7.10764700  | 1.12591200  | -0.44771500 |
| H | 5.59737800  | 1.23669500  | 0.47655800  |
| H | 5.94050000  | -0.21965300 | -0.44183900 |
| C | 5.46701600  | 3.01040900  | -1.62433900 |
| H | 5.17536800  | 3.39447000  | -0.64250000 |
| H | 6.50624500  | 3.30187200  | -1.80694100 |
| H | 4.83317200  | 3.48487400  | -2.37556600 |
| C | 7.09013900  | 0.24778000  | -3.09540200 |
| H | 7.23718700  | -0.23059800 | -4.06766700 |
| H | 7.82563600  | 1.05299500  | -2.99687800 |
| H | 7.27641400  | -0.49552600 | -2.31933000 |
| C | 5.35453300  | 1.66972400  | -4.22229500 |
| H | 6.05800400  | 2.50190800  | -4.31861000 |
| H | 5.41838000  | 1.05554100  | -5.12419400 |
| H | 4.34124100  | 2.07582400  | -4.15771400 |
| C | 2.39519700  | -0.86145300 | -1.98951100 |
| H | 2.48429500  | -1.82197400 | -2.50993400 |
| H | 1.54740800  | -0.35773800 | -2.46621800 |

**TS7'**

|   |             |             |             |
|---|-------------|-------------|-------------|
| P | -1.17469800 | -0.76113400 | -1.86735200 |
| C | -1.14798800 | 0.45508300  | -3.28129200 |
| H | -0.16058100 | 0.91800900  | -3.33644400 |
| H | -1.30452100 | -0.10869400 | -4.20576100 |

|   |             |             |             |
|---|-------------|-------------|-------------|
| C | -2.22646500 | 1.54337800  | -3.15329800 |
| H | -2.29175200 | 2.05808300  | -4.11925700 |
| H | -3.20647900 | 1.08403100  | -2.98729700 |
| C | -1.94797700 | 2.60337400  | -2.08101800 |
| H | -2.58482700 | 3.47964800  | -2.23808700 |
| H | -0.91904300 | 2.96659700  | -2.17036700 |
| P | -2.11689800 | 2.08513500  | -0.29940600 |
| C | -0.14221700 | -2.13980000 | -2.50063300 |
| C | -0.45761000 | -3.44892700 | -2.09444400 |
| C | 0.90627000  | -1.94223000 | -3.40895400 |
| C | 0.22830800  | -4.53412600 | -2.63376000 |
| H | -1.25027100 | -3.60858300 | -1.37048100 |
| C | 1.60801000  | -3.03336300 | -3.92782800 |
| H | 1.16826800  | -0.94175400 | -3.73573300 |
| C | 1.25773000  | -4.33153700 | -3.55722300 |
| H | -0.04154800 | -5.54105500 | -2.32940300 |
| H | 2.41288700  | -2.86528000 | -4.63720400 |
| H | 1.78738800  | -5.18026500 | -3.97970800 |
| C | -2.86265900 | -1.43370500 | -2.16732100 |
| C | -3.16857300 | -2.07727700 | -3.37721600 |
| C | -3.88427500 | -1.19792800 | -1.24589300 |
| C | -4.47751900 | -2.46280100 | -3.65717100 |
| H | -2.38265600 | -2.28553300 | -4.09693100 |
| C | -5.19843600 | -1.57055000 | -1.53097100 |
| H | -3.64164900 | -0.74429700 | -0.29886300 |
| C | -5.49740200 | -2.20245700 | -2.73643800 |
| H | -4.70343100 | -2.96486100 | -4.59343500 |
| H | -5.97754300 | -1.36624800 | -0.80346300 |
| H | -6.51817000 | -2.49899200 | -2.95975500 |
| C | -1.59427500 | 3.67519100  | 0.46296200  |
| C | -0.22336100 | 3.87120900  | 0.68503800  |
| C | -2.49364200 | 4.69977100  | 0.77902800  |
| C | 0.24267900  | 5.08048400  | 1.19372700  |
| H | 0.47811300  | 3.07176400  | 0.48361200  |
| C | -2.02549300 | 5.90449600  | 1.30724100  |
| H | -3.55808800 | 4.55467400  | 0.62579100  |
| C | -0.65875000 | 6.09912900  | 1.51073000  |
| H | 1.30860600  | 5.21342000  | 1.35132900  |
| H | -2.73123900 | 6.69047700  | 1.56024300  |
| H | -0.29862100 | 7.03787500  | 1.92129400  |
| C | -3.93074200 | 1.99058200  | -0.02171700 |
| C | -4.87621500 | 2.64846500  | -0.82037300 |
| C | -4.38100900 | 1.16067800  | 1.01867900  |
| C | -6.24173700 | 2.48650900  | -0.58130000 |
| H | -4.55698600 | 3.28564500  | -1.63818600 |
| C | -5.74437700 | 1.00896200  | 1.26336100  |
| H | -3.66072400 | 0.60234300  | 1.60926800  |
| C | -6.67827100 | 1.67021700  | 0.46255000  |

|    |             |             |             |
|----|-------------|-------------|-------------|
| H  | -6.96311500 | 2.99634400  | -1.21303400 |
| H  | -6.07370800 | 0.35890200  | 2.06808800  |
| H  | -7.74112200 | 1.54306900  | 0.64543700  |
| Pd | -0.75924300 | 0.20125400  | 0.30793700  |
| C  | 0.50095700  | 0.31746500  | 3.05326300  |
| C  | -0.53805600 | 0.83413300  | 2.26704900  |
| C  | -1.44762700 | 1.68112000  | 2.91741700  |
| C  | -1.31938800 | 2.00476800  | 4.27146300  |
| C  | -0.26844000 | 1.48934400  | 5.02665300  |
| C  | 0.64219300  | 0.63551700  | 4.40568200  |
| H  | 1.21659800  | -0.36334600 | 2.61162700  |
| H  | -2.04798700 | 2.66952500  | 4.72912600  |
| H  | -0.16228900 | 1.74539400  | 6.07693900  |
| H  | 1.46842600  | 0.21292900  | 4.97367400  |
| I  | -1.95919100 | -2.39271000 | 1.55280500  |
| H  | -2.28207600 | 2.12023700  | 2.38839500  |
| Cu | 0.62713100  | -1.85282200 | 0.80866000  |
| B  | 2.92937500  | 2.16400300  | -1.42124800 |
| C  | 1.60197200  | 0.56445800  | 0.04207800  |
| C  | 1.38256200  | -2.86489000 | 3.89743400  |
| O  | 3.30191900  | 3.04446700  | -0.43233600 |
| O  | 3.82300200  | 2.11774100  | -2.46234000 |
| C  | 1.90123000  | -3.21217100 | 1.48256600  |
| N  | 2.10106700  | -3.49853400 | 2.79986400  |
| N  | 2.77535500  | -4.03215100 | 0.83989600  |
| C  | 3.08901000  | -4.45541700 | 2.97195200  |
| C  | 3.51381000  | -4.79725700 | 1.72927600  |
| C  | 4.68504700  | 3.40968700  | -0.68738300 |
| C  | 4.81210000  | 3.15932600  | -2.23424100 |
| C  | 2.84903100  | -4.17688700 | -0.60247100 |
| H  | 3.39394300  | -4.80176800 | 3.94649100  |
| H  | 4.25507700  | -5.50900300 | 1.40314400  |
| H  | 2.29414000  | -3.36211700 | -1.05738900 |
| H  | 2.40765200  | -5.12775200 | -0.90950000 |
| H  | 3.88859600  | -4.12669800 | -0.92995300 |
| H  | 1.95802600  | -2.02792500 | 4.30009300  |
| H  | 1.21117300  | -3.60075500 | 4.68627200  |
| H  | 0.42225600  | -2.50368000 | 3.52957900  |
| C  | 2.84374400  | -0.22722900 | 0.25780600  |
| C  | 3.49966500  | -0.90074600 | -0.79602800 |
| C  | 4.72649700  | -1.53272900 | -0.60620200 |
| C  | 5.34071100  | -1.54281800 | 0.64743800  |
| C  | 3.51543100  | -0.20043000 | 1.50326100  |
| C  | 4.71997200  | -0.86547600 | 1.70165200  |
| H  | 3.04283800  | -0.92778700 | -1.77842300 |
| H  | 5.20011900  | -0.82157100 | 2.67580600  |
| H  | 1.53794800  | 1.29496400  | 0.84273300  |
| H  | 5.20716700  | -2.02206800 | -1.44988700 |

|   |            |             |             |
|---|------------|-------------|-------------|
| H | 6.29473000 | -2.04010200 | 0.79341300  |
| H | 3.08901400 | 0.37995300  | 2.31306400  |
| C | 5.55074900 | 2.46113100  | 0.14718500  |
| H | 6.61175400 | 2.71725600  | 0.07142200  |
| H | 5.24778800 | 2.53792800  | 1.19396700  |
| H | 5.41285900 | 1.42188300  | -0.15872400 |
| C | 4.89448900 | 4.85306000  | -0.24736300 |
| H | 4.76665600 | 4.92586500  | 0.83623700  |
| H | 5.90620100 | 5.19180200  | -0.49321400 |
| H | 4.17567300 | 5.52443500  | -0.71997500 |
| C | 6.17031500 | 2.64090000  | -2.69060500 |
| H | 6.15989500 | 2.48306800  | -3.77274700 |
| H | 6.95958200 | 3.36364200  | -2.45936400 |
| H | 6.41056400 | 1.69142100  | -2.21051200 |
| C | 4.38420300 | 4.36397900  | -3.07675700 |
| H | 5.11397700 | 5.17667900  | -3.01921800 |
| H | 4.29421700 | 4.05221700  | -4.12065000 |
| H | 3.41283400 | 4.74460500  | -2.74934300 |
| C | 1.62835000 | 1.29120800  | -1.31438600 |
| H | 1.58389200 | 0.59488100  | -2.15447200 |
| H | 0.75264600 | 1.93818600  | -1.40770000 |

**10'**

|   |             |             |             |
|---|-------------|-------------|-------------|
| P | -0.81312600 | -0.11754300 | -2.12226400 |
| C | -0.58969600 | 1.45219200  | -3.11581100 |
| H | 0.44521400  | 1.79370900  | -3.02439500 |
| H | -0.75705500 | 1.18939400  | -4.16553900 |
| C | -1.55981600 | 2.59255800  | -2.75009400 |
| H | -1.46923300 | 3.34582400  | -3.54232500 |
| H | -2.58901200 | 2.22419400  | -2.80684000 |
| C | -1.32472100 | 3.30972500  | -1.40907300 |
| H | -1.84042100 | 4.27601900  | -1.41560500 |
| H | -0.26390700 | 3.53841400  | -1.28736700 |
| P | -1.81498500 | 2.36910200  | 0.13175100  |
| C | 0.17970500  | -1.36127700 | -3.04115300 |
| C | 0.11271000  | -2.68634700 | -2.58205200 |
| C | 0.97893300  | -1.06875100 | -4.15232200 |
| C | 0.82630700  | -3.69275700 | -3.22730500 |
| H | -0.51146400 | -2.92607400 | -1.72444300 |
| C | 1.71323400  | -2.07592400 | -4.78314100 |
| H | 1.04620600  | -0.05364200 | -4.52787500 |
| C | 1.63766600  | -3.39013600 | -4.32380000 |
| H | 0.74912400  | -4.71600300 | -2.87249500 |
| H | 2.33733100  | -1.83112200 | -5.63770800 |
| H | 2.20186200  | -4.17471900 | -4.81904900 |
| C | -2.50357200 | -0.53090300 | -2.74969800 |
| C | -2.68570500 | -1.17860700 | -3.98012400 |
| C | -3.63047100 | -0.08505100 | -2.05080000 |

|    |             |             |             |
|----|-------------|-------------|-------------|
| C  | -3.96871500 | -1.37173400 | -4.49337800 |
| H  | -1.82869300 | -1.53828100 | -4.53870100 |
| C  | -4.91168200 | -0.26080600 | -2.57072400 |
| H  | -3.51394800 | 0.38365600  | -1.08772400 |
| C  | -5.08452400 | -0.90913100 | -3.79331300 |
| H  | -4.09442100 | -1.88403600 | -5.44297000 |
| H  | -5.76503000 | 0.10006000  | -2.00537200 |
| H  | -6.08158800 | -1.05923200 | -4.19722300 |
| C  | -1.36401200 | 3.62891000  | 1.40292400  |
| C  | -0.26849300 | 3.38001000  | 2.24195500  |
| C  | -2.06541400 | 4.83629000  | 1.53916900  |
| C  | 0.13112900  | 4.32993700  | 3.18332000  |
| H  | 0.25525500  | 2.43439500  | 2.17402600  |
| C  | -1.66818100 | 5.78188100  | 2.48287900  |
| H  | -2.93248700 | 5.03015700  | 0.91488900  |
| C  | -0.56558700 | 5.53196000  | 3.30396000  |
| H  | 0.98054300  | 4.12161500  | 3.82689000  |
| H  | -2.22040900 | 6.71225700  | 2.58089000  |
| H  | -0.25827200 | 6.26899500  | 4.04023400  |
| C  | -3.65474600 | 2.49433000  | 0.11285800  |
| C  | -4.39182400 | 3.30535700  | -0.76197100 |
| C  | -4.35425400 | 1.64131200  | 0.98421100  |
| C  | -5.78729100 | 3.27270400  | -0.76063700 |
| H  | -3.88587900 | 3.96226000  | -1.46070400 |
| C  | -5.74728000 | 1.61360500  | 0.99072400  |
| H  | -3.80458100 | 0.96025900  | 1.62537700  |
| C  | -6.46943700 | 2.42938700  | 0.11665000  |
| H  | -6.34033000 | 3.90454300  | -1.44973700 |
| H  | -6.26658400 | 0.94032000  | 1.66582400  |
| H  | -7.55497800 | 2.40047900  | 0.11297300  |
| Pd | -0.38756800 | -0.04188600 | 0.33845000  |
| C  | 0.87209400  | -0.86786100 | 3.04401800  |
| C  | -0.17427100 | -0.21165100 | 2.37747100  |
| C  | -1.19278100 | 0.33154400  | 3.18020500  |
| C  | -1.16480600 | 0.23247900  | 4.57181200  |
| C  | -0.11280000 | -0.42629900 | 5.21361400  |
| C  | 0.90594000  | -0.97974400 | 4.43988600  |
| H  | 1.67476600  | -1.31547900 | 2.47392000  |
| H  | -1.96754600 | 0.67560000  | 5.15583100  |
| H  | -0.08759000 | -0.49966500 | 6.29725900  |
| H  | 1.73767400  | -1.49551700 | 4.91556900  |
| I  | -2.71812900 | -1.98363200 | 0.68480300  |
| H  | -2.02509800 | 0.84819400  | 2.71766600  |
| Cu | -0.19026300 | -2.54378000 | 0.89530200  |
| B  | 3.25314300  | 2.48595700  | -0.47410000 |
| C  | 1.66265500  | 0.64486300  | 0.37036000  |
| C  | -0.39521800 | -4.19221200 | 3.68202700  |
| O  | 4.09358700  | 2.59104200  | 0.60630900  |



|   |             |             |             |
|---|-------------|-------------|-------------|
| O | 3.84810600  | 2.85926600  | -1.65593700 |
| C | 0.89213800  | -4.00945800 | 1.56129400  |
| N | 0.68008800  | -4.58719200 | 2.77665200  |
| N | 1.98926300  | -4.64817800 | 1.07696000  |
| C | 1.63110500  | -5.55763900 | 3.04774600  |
| C | 2.45750700  | -5.60121000 | 1.96911700  |
| C | 5.43309600  | 2.81712600  | 0.08963200  |
| C | 5.14479600  | 3.42856900  | -1.33029100 |
| C | 2.54236700  | -4.40788500 | -0.24682000 |
| H | 1.63710900  | -6.12169000 | 3.96677600  |
| H | 3.31704200  | -6.21767400 | 1.75973000  |
| H | 2.19042400  | -3.44151700 | -0.60202800 |
| H | 2.22272500  | -5.18987600 | -0.94148300 |
| H | 3.63018500  | -4.38268800 | -0.19565400 |
| H | -0.03891000 | -3.45708800 | 4.40668600  |
| H | -0.77715700 | -5.07719200 | 4.19591800  |
| H | -1.19247000 | -3.73767300 | 3.09183900  |
| C | 2.67887300  | -0.34850600 | -0.09220200 |
| C | 2.92355500  | -0.56771600 | -1.45977000 |
| C | 3.95855700  | -1.38801900 | -1.90127400 |
| C | 4.80839600  | -2.00751800 | -0.98115100 |
| C | 3.55491800  | -0.97611300 | 0.81686200  |
| C | 4.59714900  | -1.79313000 | 0.38273400  |
| H | 2.30531200  | -0.06661600 | -2.18967900 |
| H | 5.26569300  | -2.23967300 | 1.11430900  |
| H | 1.83913000  | 0.84100800  | 1.42498100  |
| H | 4.10240300  | -1.53396100 | -2.96752000 |
| H | 5.62818100  | -2.63343500 | -1.32183700 |
| H | 3.45501200  | -0.76355600 | 1.87462100  |
| C | 6.11754000  | 1.44956000  | 0.02502400  |
| H | 7.16005100  | 1.53836400  | -0.29512100 |
| H | 6.09660800  | 0.99713400  | 1.01894200  |
| H | 5.59366600  | 0.77450800  | -0.65432100 |
| C | 6.17498100  | 3.73898400  | 1.04981300  |
| H | 6.30240000  | 3.23612600  | 2.01228000  |
| H | 7.16828800  | 3.98523700  | 0.66038600  |
| H | 5.62642500  | 4.66613400  | 1.22270800  |
| C | 6.13517100  | 3.02526900  | -2.41609800 |
| H | 5.84523600  | 3.48208600  | -3.36653800 |
| H | 7.14469600  | 3.36816500  | -2.16720400 |
| H | 6.15492200  | 1.94295900  | -2.55092600 |
| C | 4.96341200  | 4.94893100  | -1.30822600 |
| H | 5.91116300  | 5.46710700  | -1.13617700 |
| H | 4.56257800  | 5.27113100  | -2.27287600 |
| H | 4.25613500  | 5.24710100  | -0.52970000 |
| C | 1.77095600  | 1.97480600  | -0.38926800 |
| H | 1.38904800  | 1.89656600  | -1.40623900 |
| H | 1.16063400  | 2.72783800  | 0.11717900  |

## 10

|   |             |             |             |
|---|-------------|-------------|-------------|
| P | 0.25660800  | 1.80656500  | -1.14282900 |
| C | 1.33409700  | 2.29960700  | -2.58481000 |
| H | 0.96724400  | 1.71505900  | -3.43617200 |
| H | 1.11867400  | 3.34628800  | -2.82202400 |
| C | 2.85025400  | 2.09658600  | -2.43146800 |
| H | 3.33697200  | 2.61969800  | -3.26333700 |
| H | 3.20986200  | 2.58135700  | -1.51793900 |
| C | 3.31993300  | 0.63609200  | -2.45456000 |
| H | 4.40056400  | 0.59022800  | -2.62335100 |
| H | 2.83906800  | 0.10451500  | -3.28259300 |
| P | 2.92067900  | -0.28334400 | -0.88917000 |
| C | -1.34944500 | 2.44495600  | -1.76689900 |
| C | -2.01616800 | 3.52215500  | -1.17099600 |
| C | -1.94926000 | 1.78853000  | -2.85199100 |
| C | -3.26602800 | 3.92390600  | -1.64271300 |
| H | -1.56955000 | 4.03208500  | -0.32554400 |
| C | -3.19745300 | 2.19127300  | -3.32254200 |
| H | -1.45025800 | 0.94296000  | -3.31725200 |
| C | -3.86223800 | 3.25722000  | -2.71337300 |
| H | -3.77751500 | 4.75482400  | -1.16568400 |
| H | -3.65676500 | 1.66341400  | -4.15247200 |
| H | -4.84107600 | 3.56290800  | -3.06995200 |
| C | 0.71127300  | 3.01093500  | 0.16782800  |
| C | 1.47147700  | 4.16471300  | -0.06699500 |
| C | 0.28295000  | 2.73651100  | 1.47577100  |
| C | 1.81928500  | 5.01013500  | 0.98731100  |
| H | 1.80061200  | 4.41393300  | -1.06926600 |
| C | 0.61313100  | 3.59262200  | 2.52438700  |
| H | -0.30163800 | 1.84883600  | 1.67544200  |
| C | 1.39262500  | 4.72589300  | 2.28526100  |
| H | 2.42142700  | 5.89259300  | 0.79237400  |
| H | 0.25911000  | 3.36349400  | 3.52457300  |
| H | 1.66263500  | 5.38724200  | 3.10334000  |
| C | 3.75519400  | -1.88827900 | -1.14400800 |
| C | 3.62254000  | -2.56475800 | -2.36442600 |
| C | 4.40178100  | -2.52696000 | -0.07753000 |
| C | 4.13975800  | -3.84989000 | -2.51953000 |
| H | 3.09997200  | -2.10024400 | -3.19475800 |
| C | 4.90828900  | -3.81506900 | -0.23219400 |
| H | 4.47934900  | -2.02990400 | 0.88191000  |
| C | 4.78257200  | -4.47893900 | -1.45289600 |
| H | 4.03279500  | -4.36219600 | -3.47117300 |
| H | 5.38938000  | -4.30480000 | 0.60859800  |
| H | 5.17489600  | -5.48461600 | -1.57004000 |
| C | 3.96740000  | 0.58664300  | 0.33422500  |
| C | 5.35539300  | 0.71744800  | 0.17452900  |

|    |             |             |             |
|----|-------------|-------------|-------------|
| C  | 3.34375700  | 1.19124500  | 1.43153200  |
| C  | 6.09988400  | 1.45443800  | 1.09286800  |
| H  | 5.85298500  | 0.23194800  | -0.66000500 |
| C  | 4.08780000  | 1.93698300  | 2.34637600  |
| H  | 2.27275800  | 1.08478900  | 1.55239600  |
| C  | 5.46537100  | 2.07025900  | 2.17641500  |
| H  | 7.17408200  | 1.55104800  | 0.96526400  |
| H  | 3.58504400  | 2.41653600  | 3.17988900  |
| H  | 6.04816000  | 2.64991000  | 2.88628500  |
| Pd | 0.62048900  | -0.43221700 | -0.29476200 |
| C  | 1.03483500  | -3.42379700 | -0.03015500 |
| C  | 1.12088000  | -2.18814400 | 0.62626100  |
| C  | 1.64334000  | -2.17063600 | 1.92790100  |
| C  | 2.07609200  | -3.34683300 | 2.55021300  |
| C  | 1.99553100  | -4.56648600 | 1.87768200  |
| C  | 1.47092900  | -4.59994700 | 0.58363300  |
| H  | 0.63487700  | -3.47193800 | -1.03969300 |
| H  | 2.47876700  | -3.30730000 | 3.55998700  |
| H  | 2.33609500  | -5.48086000 | 2.35562800  |
| H  | 1.40537400  | -5.54436400 | 0.04887600  |
| H  | 1.72748700  | -1.22920300 | 2.46531900  |
| B  | -3.69457100 | -1.57025500 | -0.58868400 |
| C  | -1.37214700 | -1.00453400 | 0.26485400  |
| O  | -4.05036600 | -2.59701100 | 0.25378300  |
| O  | -4.76307700 | -0.77808500 | -0.94100200 |
| C  | -5.38701300 | -2.31297700 | 0.74161500  |
| C  | -5.96283800 | -1.37253700 | -0.38206900 |
| C  | -1.89868400 | -0.00988200 | 1.23358000  |
| C  | -2.76942700 | 1.03677700  | 0.87479400  |
| C  | -3.21200900 | 1.96567200  | 1.81838900  |
| C  | -2.81305300 | 1.87253600  | 3.15177100  |
| C  | -1.52131500 | -0.09978300 | 2.59191700  |
| C  | -1.96749600 | 0.82285000  | 3.53278500  |
| H  | -3.11258100 | 1.12237600  | -0.14704100 |
| H  | -1.66008800 | 0.72273300  | 4.57069700  |
| H  | -1.25152900 | -1.95100900 | 0.78694000  |
| H  | -3.87458500 | 2.76653600  | 1.50108300  |
| H  | -3.16037200 | 2.59462800  | 3.88462300  |
| H  | -0.85983100 | -0.90828600 | 2.89029000  |
| C  | -5.21885700 | -1.61055000 | 2.09328600  |
| H  | -6.18558700 | -1.41512900 | 2.56702700  |
| H  | -4.63397500 | -2.25714800 | 2.75230200  |
| H  | -4.67750900 | -0.66818600 | 1.98716700  |
| C  | -6.13193000 | -3.63082200 | 0.92111700  |
| H  | -5.64323000 | -4.22175800 | 1.70037500  |
| H  | -7.16765000 | -3.45203200 | 1.22844000  |
| H  | -6.13564700 | -4.21988600 | 0.00267100  |
| C  | -6.86128100 | -0.24884700 | 0.12319700  |

|   |             |             |             |
|---|-------------|-------------|-------------|
| H | -7.19910800 | 0.35911000  | -0.72096700 |
| H | -7.74473600 | -0.65324900 | 0.62796700  |
| H | -6.32549400 | 0.40061700  | 0.81681100  |
| C | -6.64621800 | -2.13541900 | -1.52040600 |
| H | -7.60173200 | -2.56457400 | -1.20487700 |
| H | -6.83218000 | -1.44418300 | -2.34679200 |
| H | -6.00623400 | -2.94140000 | -1.88940900 |
| C | -2.21202400 | -1.26053900 | -1.00059500 |
| H | -2.19953900 | -0.41277000 | -1.68770700 |
| H | -1.77012400 | -2.11105800 | -1.53406900 |

**TS8'**

|   |             |             |             |
|---|-------------|-------------|-------------|
| P | 0.18080800  | 1.51212700  | -1.47425200 |
| C | 1.35347900  | 1.75654700  | -2.90549600 |
| H | 1.24642400  | 0.88853200  | -3.56466500 |
| H | 1.04511200  | 2.63805100  | -3.47691700 |
| C | 2.82318000  | 1.91580000  | -2.47161500 |
| H | 3.37177600  | 2.33755200  | -3.32269100 |
| H | 2.88547900  | 2.66459200  | -1.67479100 |
| C | 3.56160000  | 0.63343500  | -2.04890400 |
| H | 4.63917800  | 0.82728300  | -1.99580900 |
| H | 3.42989400  | -0.14250500 | -2.81217900 |
| P | 3.00938700  | -0.17422600 | -0.46249900 |
| C | -1.46891400 | 1.71936400  | -2.24635200 |
| C | -2.44788800 | 2.56026000  | -1.69471500 |
| C | -1.83537500 | 0.86126300  | -3.29727300 |
| C | -3.75716400 | 2.53576100  | -2.17581400 |
| H | -2.18584500 | 3.22598500  | -0.87966000 |
| C | -3.13935900 | 0.85122800  | -3.78703800 |
| H | -1.10134500 | 0.18013800  | -3.71979800 |
| C | -4.10823600 | 1.68282100  | -3.22133700 |
| H | -4.50512200 | 3.18307200  | -1.72701500 |
| H | -3.40372200 | 0.18160800  | -4.60024900 |
| H | -5.12942600 | 1.65943300  | -3.58894300 |
| C | 0.43139300  | 3.07443600  | -0.54441700 |
| C | 0.37516500  | 4.33788700  | -1.15443100 |
| C | 0.74492700  | 2.98915800  | 0.81648600  |
| C | 0.64089000  | 5.48962300  | -0.41654500 |
| H | 0.11518300  | 4.42159900  | -2.20578800 |
| C | 1.01401400  | 4.14149900  | 1.55542900  |
| H | 0.77775200  | 2.01877100  | 1.29363700  |
| C | 0.96586000  | 5.39126300  | 0.94014100  |
| H | 0.59615300  | 6.46292200  | -0.89671000 |
| H | 1.26629600  | 4.05274900  | 2.60676300  |
| H | 1.17836400  | 6.28970600  | 1.51251900  |
| C | 4.24257800  | -1.52942900 | -0.35218000 |
| C | 3.89667000  | -2.76290500 | -0.92177800 |
| C | 5.49445700  | -1.38350700 | 0.26282100  |

|    |             |             |             |
|----|-------------|-------------|-------------|
| C  | 4.79731300  | -3.82689100 | -0.89446300 |
| H  | 2.91493900  | -2.89719200 | -1.36275600 |
| C  | 6.39010900  | -2.45195300 | 0.29422900  |
| H  | 5.76499500  | -0.43741400 | 0.72102000  |
| C  | 6.04421400  | -3.67427400 | -0.28701600 |
| H  | 4.50831000  | -4.77979900 | -1.32665800 |
| H  | 7.35726900  | -2.33142400 | 0.77421900  |
| H  | 6.74146600  | -4.50665500 | -0.25658900 |
| C  | 3.53689400  | 0.99049100  | 0.85585100  |
| C  | 4.40692600  | 2.07031700  | 0.65859700  |
| C  | 2.97257900  | 0.80225500  | 2.12836600  |
| C  | 4.69916200  | 2.94669000  | 1.70589500  |
| H  | 4.85795000  | 2.23957800  | -0.31330200 |
| C  | 3.27685500  | 1.66528900  | 3.17742800  |
| H  | 2.26126000  | -0.00494800 | 2.27648600  |
| C  | 4.13766000  | 2.74585700  | 2.96651900  |
| H  | 5.36499300  | 3.78741900  | 1.53446600  |
| H  | 2.82577800  | 1.50700800  | 4.15256800  |
| H  | 4.36387200  | 3.43055000  | 3.77856100  |
| Pd | 0.69284500  | -0.54840100 | -0.38161500 |
| C  | 0.24244900  | -3.31905000 | -1.27984600 |
| C  | 0.43099000  | -2.64031000 | -0.05933000 |
| C  | 1.12468100  | -3.32271200 | 0.96342500  |
| C  | 1.62314900  | -4.60570700 | 0.76531400  |
| C  | 1.44422900  | -5.25990300 | -0.46059900 |
| C  | 0.75951800  | -4.60341400 | -1.48267600 |
| H  | -0.30279900 | -2.83320600 | -2.08337300 |
| H  | 2.17104700  | -5.09568000 | 1.56607100  |
| H  | 1.83131900  | -6.26321500 | -0.61054300 |
| H  | 0.61296900  | -5.09286100 | -2.44263700 |
| H  | 1.29839900  | -2.82981100 | 1.91521800  |
| B  | -3.77818600 | -1.50050600 | 0.01195600  |
| C  | -1.28056900 | -1.67811700 | 0.52661200  |
| O  | -4.28938000 | -2.23189500 | 1.05523100  |
| O  | -4.64001200 | -0.53047400 | -0.43763700 |
| C  | -5.49105200 | -1.55480800 | 1.51531700  |
| C  | -5.90276300 | -0.70260500 | 0.25507800  |
| C  | -1.27414200 | -0.49992500 | 1.45822500  |
| C  | -1.98978500 | 0.68610900  | 1.19123200  |
| C  | -2.00301900 | 1.73821500  | 2.10183800  |
| C  | -1.29384100 | 1.65237800  | 3.30339900  |
| C  | -0.58786300 | -0.58102800 | 2.68714600  |
| C  | -0.58472200 | 0.48391500  | 3.58721600  |
| H  | -2.53793200 | 0.78721400  | 0.26390700  |
| H  | -0.04036500 | 0.39130000  | 4.52331100  |
| H  | -1.38938800 | -2.57122300 | 1.13604800  |
| H  | -2.56136800 | 2.63915700  | 1.86339000  |
| H  | -1.29842800 | 2.47982500  | 4.00602500  |

|   |             |             |             |
|---|-------------|-------------|-------------|
| H | -0.06277300 | -1.49724400 | 2.93640100  |
| C | -5.07871300 | -0.70385400 | 2.72005700  |
| H | -5.94079500 | -0.20463600 | 3.17219100  |
| H | -4.62444300 | -1.35664200 | 3.46983900  |
| H | -4.33630500 | 0.04744200  | 2.44316300  |
| C | -6.50808700 | -2.60895100 | 1.93838900  |
| H | -6.12223900 | -3.16288800 | 2.79829700  |
| H | -7.45300200 | -2.14018700 | 2.23187300  |
| H | -6.70570000 | -3.32300500 | 1.13745700  |
| C | -6.46367600 | 0.67989600  | 0.56849400  |
| H | -6.68732900 | 1.20258900  | -0.36571300 |
| H | -7.38862900 | 0.60438500  | 1.14906400  |
| H | -5.74503000 | 1.28015600  | 1.12809400  |
| C | -6.82922200 | -1.44910400 | -0.70858100 |
| H | -7.83522300 | -1.56699200 | -0.29575000 |
| H | -6.89906400 | -0.88029900 | -1.63948500 |
| H | -6.43097200 | -2.43911500 | -0.94608300 |
| C | -2.33635500 | -1.69588500 | -0.57587600 |
| H | -2.15665300 | -0.93238500 | -1.33521900 |
| H | -2.28117000 | -2.66444500 | -1.08559100 |

**P<sub>3</sub>**

|   |             |             |             |
|---|-------------|-------------|-------------|
| C | 3.50045800  | -1.54304500 | 0.95706800  |
| C | 2.80154400  | -0.62856600 | 0.15986600  |
| C | 3.49724800  | 0.04227700  | -0.85250300 |
| C | 4.85450500  | -0.19964000 | -1.06510500 |
| C | 5.54029600  | -1.11606400 | -0.26671800 |
| C | 4.85733500  | -1.78814300 | 0.74794200  |
| H | 2.97207600  | -2.06733100 | 1.74991600  |
| H | 5.37843600  | 0.33343300  | -1.85341500 |
| H | 6.59776200  | -1.30110800 | -0.43030200 |
| H | 5.38162100  | -2.49906300 | 1.38020200  |
| H | 2.97607500  | 0.76814300  | -1.46859200 |
| B | -1.05587600 | -1.16661200 | -0.27705700 |
| C | 1.30736900  | -0.43173700 | 0.37833400  |
| O | -1.62329300 | -1.06823700 | 0.96957900  |
| O | -1.94629400 | -0.94256900 | -1.29495000 |
| C | -2.94004100 | -0.47482700 | 0.79748300  |
| C | -3.26980500 | -0.82427300 | -0.70118600 |
| C | 0.86607800  | 1.01164800  | 0.18419900  |
| C | 0.38019900  | 1.49032300  | -1.03955000 |
| C | -0.03182500 | 2.81824500  | -1.17610200 |
| C | 0.03376800  | 3.68987900  | -0.08983900 |
| C | 0.93501600  | 1.90160700  | 1.26370800  |
| C | 0.52223800  | 3.22573000  | 1.13377000  |
| H | 0.29694900  | 0.82204200  | -1.88917900 |
| H | 0.57533200  | 3.89451900  | 1.98793700  |
| H | 1.09860800  | -0.67885000 | 1.42499900  |

|   |             |             |             |
|---|-------------|-------------|-------------|
| H | -0.41056400 | 3.16655000  | -2.13268600 |
| H | -0.29359800 | 4.72003100  | -0.19329500 |
| H | 1.30947900  | 1.54264700  | 2.21873000  |
| C | -2.78199400 | 1.02788600  | 1.04934700  |
| H | -3.74797500 | 1.54032600  | 1.01806200  |
| H | -2.34327400 | 1.17452300  | 2.03923200  |
| H | -2.11464200 | 1.48997700  | 0.31948400  |
| C | -3.88590700 | -1.08679900 | 1.82382900  |
| H | -3.56102300 | -0.80985700 | 2.83037000  |
| H | -4.90519200 | -0.71356000 | 1.68160300  |
| H | -3.89965500 | -2.17589800 | 1.75999300  |
| C | -4.03885300 | 0.25321300  | -1.45622200 |
| H | -4.20636400 | -0.06867000 | -2.48769800 |
| H | -5.01424900 | 0.43050100  | -0.99190700 |
| H | -3.48503100 | 1.19275300  | -1.47880700 |
| C | -3.94914900 | -2.18571300 | -0.87018900 |
| H | -4.98052100 | -2.16880500 | -0.50685400 |
| H | -3.95931600 | -2.44690000 | -1.93147500 |
| H | -3.40282500 | -2.96592000 | -0.33346700 |
| C | 0.47973500  | -1.42666800 | -0.48048600 |
| H | 0.75661300  | -1.34704200 | -1.53666600 |
| H | 0.74806300  | -2.44493300 | -0.17380800 |

### COM<sub>3-7b</sub>

|   |             |             |            |
|---|-------------|-------------|------------|
| P | 1.41283900  | -0.30623300 | 2.17231700 |
| C | 1.20072200  | 0.83495600  | 3.62736900 |
| H | 0.13488400  | 1.07200900  | 3.72135300 |
| H | 1.49510700  | 0.31257500  | 4.54275900 |
| C | 2.02044400  | 2.13072300  | 3.48911700 |
| H | 2.04274800  | 2.61552000  | 4.47194700 |
| H | 3.05830600  | 1.88325900  | 3.24728000 |
| C | 1.47330000  | 3.16751600  | 2.49420400 |
| H | 1.95604400  | 4.13659300  | 2.65989100 |
| H | 0.40440700  | 3.31118700  | 2.68517800 |
| P | 1.59626800  | 2.75174900  | 0.69238200 |
| C | 0.84109900  | -1.93046800 | 2.80370600 |
| C | 1.46606000  | -3.09313800 | 2.31963200 |
| C | -0.18521000 | -2.04662400 | 3.75104000 |
| C | 1.08140700  | -4.34265000 | 2.80151900 |
| H | 2.25527600  | -3.02619000 | 1.57856300 |
| C | -0.57261900 | -3.30298900 | 4.22147900 |
| H | -0.68327800 | -1.16203800 | 4.13311100 |
| C | 0.06630900  | -4.45257000 | 3.75516100 |
| H | 1.58047900  | -5.23037200 | 2.42507900 |
| H | -1.36553200 | -3.37867200 | 4.95974500 |
| H | -0.22697900 | -5.42834100 | 4.13129900 |
| C | 3.22794400  | -0.54865400 | 2.16357100 |

|    |             |             |             |
|----|-------------|-------------|-------------|
| C  | 3.93217900  | -0.81319900 | 3.35011700  |
| C  | 3.91963000  | -0.49483000 | 0.95362600  |
| C  | 5.31138800  | -0.99549000 | 3.31866700  |
| H  | 3.40352000  | -0.89061200 | 4.29561200  |
| C  | 5.29964200  | -0.69374600 | 0.92045100  |
| H  | 3.36897800  | -0.33125900 | 0.04111600  |
| C  | 5.99736400  | -0.93450300 | 2.10061000  |
| H  | 5.85133700  | -1.19677400 | 4.23930500  |
| H  | 5.81314200  | -0.67335100 | -0.03374200 |
| H  | 7.07202200  | -1.08979500 | 2.07676200  |
| C  | 0.97657900  | 4.27597300  | -0.11903100 |
| C  | 0.08608500  | 5.15026100  | 0.51880800  |
| C  | 1.28867500  | 4.49368900  | -1.46973100 |
| C  | -0.48542000 | 6.21324200  | -0.18075100 |
| H  | -0.18381300 | 5.00529800  | 1.55857400  |
| C  | 0.71283800  | 5.55215600  | -2.16611700 |
| H  | 1.96475300  | 3.82084400  | -1.98536100 |
| C  | -0.18063800 | 6.41291200  | -1.52615000 |
| H  | -1.17627800 | 6.87937900  | 0.32743500  |
| H  | 0.95400100  | 5.69688500  | -3.21452600 |
| H  | -0.63704300 | 7.23144300  | -2.07394500 |
| C  | 3.37239300  | 2.73016900  | 0.26533900  |
| C  | 4.35839900  | 3.32094400  | 1.06474300  |
| C  | 3.74242000  | 2.07396400  | -0.91982200 |
| C  | 5.69932200  | 3.25067100  | 0.68775700  |
| H  | 4.08995500  | 3.83136200  | 1.98391600  |
| C  | 5.08098500  | 2.02843700  | -1.30366800 |
| H  | 2.99145300  | 1.57071000  | -1.52140200 |
| C  | 6.06124900  | 2.60988100  | -0.49820000 |
| H  | 6.46065000  | 3.69688600  | 1.32044600  |
| H  | 5.35489000  | 1.50448800  | -2.21356300 |
| H  | 7.10648600  | 2.55481800  | -0.78715400 |
| Pd | 0.56706800  | 0.73789900  | 0.16063900  |
| C  | -1.30712500 | 2.48062200  | -3.42151000 |
| C  | -0.99195500 | 2.26795600  | -2.07086600 |
| C  | -1.77871300 | 2.86055100  | -1.07921000 |
| C  | -2.86926900 | 3.65390400  | -1.42689600 |
| C  | -3.18791900 | 3.84999700  | -2.77135900 |
| C  | -2.40399500 | 3.26202800  | -3.77002300 |
| H  | -0.67886100 | 2.01553400  | -4.17406100 |
| H  | -3.46804700 | 4.11286800  | -0.64711600 |
| H  | -4.04449400 | 4.46008800  | -3.04326300 |
| H  | -2.65125000 | 3.41763400  | -4.81619300 |
| H  | -1.52925400 | 2.70233100  | -0.03668300 |
| Cu | -0.37241000 | -1.49615200 | -0.50491300 |
| B  | -3.70123300 | 0.21380800  | 1.80205000  |
| C  | -1.99086400 | -0.34130000 | 0.07063800  |
| C  | -0.73471000 | -2.58209900 | -3.59818800 |



|   |             |             |             |
|---|-------------|-------------|-------------|
| O | -3.97095500 | 1.50943400  | 1.41521900  |
| O | -4.81011200 | -0.44226000 | 2.27217000  |
| C | -1.08711900 | -3.26118000 | -1.24803900 |
| N | -1.24419100 | -3.48387600 | -2.57561200 |
| N | -1.59131300 | -4.37536900 | -0.66313200 |
| C | -1.82080000 | -4.71905300 | -2.82059000 |
| C | -2.04954500 | -5.28502800 | -1.60762600 |
| C | -5.41561800 | 1.62640700  | 1.30852900  |
| C | -5.91088400 | 0.50810600  | 2.29739900  |
| C | -1.69471900 | -4.55177700 | 0.77271400  |
| H | -1.25938000 | -3.67932600 | 1.25543200  |
| H | -1.14327100 | -5.43853400 | 1.09268500  |
| H | -2.74305800 | -4.64610100 | 1.07225000  |
| H | 0.29319500  | -2.84819300 | -3.84897900 |
| H | -0.75338500 | -1.56481700 | -3.20710500 |
| H | -1.37698900 | -2.63295100 | -4.47991000 |
| C | -3.01332400 | -0.97159700 | -0.81912600 |
| C | -3.84161100 | -2.02714400 | -0.39426200 |
| C | -4.79335700 | -2.58835000 | -1.24456300 |
| C | -4.94799600 | -2.11355500 | -2.54794400 |
| C | -3.19563700 | -0.49577200 | -2.13181500 |
| C | -4.14190600 | -1.05739500 | -2.98273100 |
| H | -3.74979500 | -2.40570200 | 0.61650100  |
| H | -4.25857400 | -0.66082400 | -3.98793800 |
| H | -1.95309000 | 0.70441000  | -0.19421600 |
| H | -5.41811900 | -3.40145400 | -0.88439300 |
| H | -5.68901400 | -2.55148800 | -3.20996200 |
| H | -2.58682900 | 0.32917400  | -2.48108400 |
| C | -5.77636700 | 1.34430200  | -0.15417400 |
| H | -6.84429400 | 1.49711400  | -0.33633600 |
| H | -5.21051400 | 2.02531200  | -0.79426700 |
| H | -5.51098400 | 0.32607300  | -0.44487200 |
| C | -5.81853900 | 3.04620600  | 1.68753700  |
| H | -5.41883100 | 3.74771900  | 0.94973300  |
| H | -6.90818500 | 3.15127300  | 1.69590200  |
| H | -5.43144000 | 3.32718600  | 2.66835500  |
| C | -7.17601400 | -0.21954300 | 1.85826700  |
| H | -7.43831300 | -0.98058900 | 2.59846600  |
| H | -8.01631200 | 0.47713100  | 1.77320300  |
| H | -7.02900800 | -0.71554100 | 0.89790500  |
| C | -6.04058100 | 0.99208600  | 3.74378000  |
| H | -6.89456600 | 1.66365400  | 3.87108100  |
| H | -6.18211800 | 0.12568200  | 4.39508700  |
| H | -5.13498000 | 1.51402800  | 4.06479200  |
| C | -2.28713400 | -0.43046700 | 1.58026200  |
| H | -2.23410500 | -1.44993000 | 1.97014800  |
| H | -1.52350800 | 0.14632500  | 2.11124600  |
| C | 0.17427800  | 1.38664600  | -1.72954500 |

|   |             |             |             |
|---|-------------|-------------|-------------|
| O | 0.96046500  | 1.04499700  | -2.60008200 |
| S | 2.49620200  | -2.88986800 | -1.35502200 |
| O | 3.53115300  | -3.35903700 | -0.42014200 |
| O | 1.72963900  | -3.91181600 | -2.08431100 |
| C | 3.41705700  | -1.98780900 | -2.69478300 |
| F | 4.28533800  | -2.80534000 | -3.30293200 |
| F | 4.11102200  | -0.94223100 | -2.19342500 |
| F | 2.56195300  | -1.51358200 | -3.61238200 |
| O | 1.67561500  | -1.75840900 | -0.78712800 |
| H | -2.49124100 | -6.23068200 | -1.33740300 |
| H | -2.01362800 | -5.08055800 | -3.81786000 |

#### TS14

|   |             |             |             |
|---|-------------|-------------|-------------|
| P | -0.88520700 | -0.73630800 | -2.39523600 |
| C | -0.71353300 | 0.44465500  | -3.83744700 |
| H | 0.28246900  | 0.89621200  | -3.76742900 |
| H | -0.73419900 | -0.13866500 | -4.76285200 |
| C | -1.78653300 | 1.54291600  | -3.90674000 |
| H | -1.72330500 | 1.99962300  | -4.90176700 |
| H | -2.77888200 | 1.08977200  | -3.84157800 |
| C | -1.65777800 | 2.67947400  | -2.88467600 |
| H | -2.35247400 | 3.48851000  | -3.13432000 |
| H | -0.64832300 | 3.09954700  | -2.94489600 |
| P | -1.88933400 | 2.22934900  | -1.10312800 |
| C | -0.06899100 | -2.23784200 | -3.09145400 |
| C | -0.65578000 | -3.49850300 | -2.89654600 |
| C | 1.12236100  | -2.15576600 | -3.82755700 |
| C | -0.07465500 | -4.64279600 | -3.44079700 |
| H | -1.57773400 | -3.58150100 | -2.33208700 |
| C | 1.71066900  | -3.30436000 | -4.35794100 |
| H | 1.59710400  | -1.19569500 | -3.99497500 |
| C | 1.11071500  | -4.55087100 | -4.17231000 |
| H | -0.55092500 | -5.60716700 | -3.29082900 |
| H | 2.63229000  | -3.22116000 | -4.92626900 |
| H | 1.56265100  | -5.44239100 | -4.59657000 |
| C | -2.63786700 | -1.25539200 | -2.52645600 |
| C | -3.24862000 | -1.48000900 | -3.77254800 |
| C | -3.35746900 | -1.50162200 | -1.35594800 |
| C | -4.56853600 | -1.91688000 | -3.83472700 |
| H | -2.69318100 | -1.32620200 | -4.69277700 |
| C | -4.67585400 | -1.95825800 | -1.41884800 |
| H | -2.89085400 | -1.33940900 | -0.39529200 |
| C | -5.28404100 | -2.15626200 | -2.65591900 |
| H | -5.03801400 | -2.07977700 | -4.80066300 |
| H | -5.20192400 | -2.14224300 | -0.48904600 |
| H | -6.31262500 | -2.50127800 | -2.70897400 |
| C | -1.83530400 | 3.87517900  | -0.28101500 |
| C | -1.06031400 | 4.92648000  | -0.78998900 |

|    |             |             |             |
|----|-------------|-------------|-------------|
| C  | -2.48393100 | 4.05085300  | 0.95061700  |
| C  | -0.92957900 | 6.12035900  | -0.08217100 |
| H  | -0.52998300 | 4.81980800  | -1.72870900 |
| C  | -2.35111500 | 5.24412500  | 1.65570800  |
| H  | -3.08317300 | 3.25144600  | 1.36821500  |
| C  | -1.56984400 | 6.28146000  | 1.14530400  |
| H  | -0.31322200 | 6.91723900  | -0.48654600 |
| H  | -2.85535200 | 5.35811800  | 2.61043100  |
| H  | -1.45809800 | 7.20703400  | 1.70173500  |
| C  | -3.63088300 | 1.74209100  | -0.88543000 |
| C  | -4.63241400 | 1.99876800  | -1.83000400 |
| C  | -3.95918500 | 1.11068300  | 0.32285900  |
| C  | -5.94898600 | 1.62412900  | -1.56472700 |
| H  | -4.39586200 | 2.48780800  | -2.76925500 |
| C  | -5.28072600 | 0.76489600  | 0.59569400  |
| H  | -3.17851700 | 0.86459500  | 1.03306900  |
| C  | -6.27472200 | 1.01645100  | -0.35023800 |
| H  | -6.72071200 | 1.80985900  | -2.30595500 |
| H  | -5.50601100 | 0.25292700  | 1.52325800  |
| H  | -7.30162800 | 0.72594700  | -0.14921000 |
| Pd | -0.23722300 | 0.62391800  | -0.39995800 |
| C  | 1.03027700  | 3.81146100  | 2.32254900  |
| C  | 0.88955300  | 3.01957100  | 1.17501400  |
| C  | 1.59249300  | 3.36286300  | 0.01576600  |
| C  | 2.43737700  | 4.46994400  | 0.00251000  |
| C  | 2.57738200  | 5.25103500  | 1.15096100  |
| C  | 1.86843300  | 4.92222000  | 2.31063100  |
| H  | 0.46419400  | 3.53726500  | 3.20619600  |
| H  | 2.98591400  | 4.71649700  | -0.90099200 |
| H  | 3.23599100  | 6.11500700  | 1.14416900  |
| H  | 1.97097400  | 5.53470100  | 3.20165600  |
| H  | 1.47154600  | 2.75778900  | -0.87611500 |
| Cu | 0.04436200  | -1.74175800 | 0.86170600  |
| B  | 3.97529400  | 0.33986600  | -1.39149000 |
| C  | 1.90559500  | 0.05448200  | -0.01194200 |
| C  | 0.49570200  | -3.23964100 | 3.83192300  |
| O  | 4.16758400  | 1.70232600  | -1.29958900 |
| O  | 5.15013500  | -0.36544100 | -1.33286200 |
| C  | 0.98386300  | -3.39696600 | 1.38277200  |
| N  | 1.10237000  | -3.85517000 | 2.65841600  |
| N  | 1.72034100  | -4.28064200 | 0.65238700  |
| C  | 1.89303800  | -4.99010600 | 2.72207000  |
| C  | 2.28818800  | -5.26005600 | 1.45267800  |
| C  | 5.50124600  | 1.89518200  | -0.75602300 |
| C  | 6.24100800  | 0.59342700  | -1.23665700 |
| C  | 1.99449400  | -4.14672500 | -0.76556100 |
| H  | 1.42131900  | -3.30595300 | -1.14689000 |
| H  | 1.69734100  | -5.04865100 | -1.30244300 |

|   |             |             |             |
|---|-------------|-------------|-------------|
| H | 3.05926500  | -3.95901000 | -0.92962500 |
| H | -0.35979900 | -3.82425500 | 4.16987000  |
| H | 0.15008200  | -2.24677300 | 3.56372200  |
| H | 1.25059900  | -3.15483000 | 4.61622100  |
| C | 2.51795900  | -0.65234600 | 1.16269700  |
| C | 3.52228700  | -1.63069500 | 1.02433800  |
| C | 4.15152900  | -2.19439100 | 2.13386700  |
| C | 3.80728500  | -1.79679700 | 3.42510200  |
| C | 2.18415200  | -0.26524200 | 2.47944900  |
| C | 2.81939700  | -0.82169200 | 3.58522500  |
| H | 3.83457600  | -1.94664600 | 0.03872400  |
| H | 2.53216300  | -0.49500000 | 4.58103200  |
| H | 2.11964000  | 1.10144600  | 0.17696300  |
| H | 4.91730400  | -2.95034000 | 1.98222700  |
| H | 4.29955700  | -2.23362800 | 4.28894100  |
| H | 1.40269500  | 0.46579700  | 2.63873800  |
| C | 5.34092300  | 1.97334700  | 0.76668400  |
| H | 6.29415600  | 2.18294100  | 1.26040000  |
| H | 4.63973200  | 2.77728200  | 1.00311100  |
| H | 4.93305900  | 1.04306200  | 1.17054400  |
| C | 6.06966100  | 3.19997000  | -1.29846700 |
| H | 5.47715300  | 4.03779700  | -0.92137700 |
| H | 7.10330700  | 3.33947200  | -0.96594100 |
| H | 6.04589200  | 3.22711100  | -2.38919100 |
| C | 7.26873400  | 0.04456200  | -0.25444900 |
| H | 7.73089100  | -0.85601000 | -0.66852500 |
| H | 8.05935400  | 0.77886800  | -0.06933200 |
| H | 6.80126000  | -0.21960100 | 0.69515200  |
| C | 6.84228600  | 0.72224000  | -2.63769200 |
| H | 7.72115400  | 1.37341500  | -2.64077900 |
| H | 7.14513500  | -0.26864000 | -2.98610900 |
| H | 6.10868000  | 1.12251700  | -3.34268300 |
| C | 2.52884400  | -0.26843100 | -1.38862400 |
| H | 2.49810000  | -1.33384300 | -1.62067800 |
| H | 1.94054000  | 0.24127700  | -2.15907900 |
| C | -0.03225700 | 1.83014400  | 1.22550000  |
| O | -0.70997000 | 1.61393700  | 2.21184200  |
| S | -2.81011000 | -1.93888800 | 2.30185000  |
| O | -4.20765400 | -1.89465800 | 1.84117900  |
| O | -2.29791400 | -3.23090800 | 2.77968100  |
| C | -2.77565600 | -0.82301700 | 3.78508700  |
| F | -3.48341000 | -1.35740600 | 4.78955800  |
| F | -3.30288800 | 0.37459300  | 3.48591400  |
| F | -1.51340100 | -0.63870500 | 4.20966800  |
| O | -1.86878800 | -1.19419500 | 1.38191900  |
| H | 2.91329800  | -6.04276500 | 1.05366400  |
| H | 2.10047400  | -5.49515900 | 3.65176600  |

8"

|   |             |             |             |
|---|-------------|-------------|-------------|
| P | 1.70050100  | -2.80786500 | -0.39173900 |
| C | 3.05688900  | -3.73245300 | 0.50089000  |
| H | 2.59727700  | -4.11390300 | 1.42004400  |
| H | 3.30737900  | -4.61147900 | -0.10110400 |
| C | 4.33455500  | -2.95750000 | 0.83782300  |
| H | 5.07332200  | -3.68125600 | 1.20204900  |
| H | 4.75796700  | -2.52296400 | -0.07347300 |
| C | 4.17060400  | -1.87207000 | 1.91466700  |
| H | 5.14476100  | -1.59456500 | 2.32865600  |
| H | 3.56906100  | -2.25871800 | 2.74465400  |
| P | 3.31031000  | -0.35831400 | 1.29058500  |
| C | 0.57813400  | -4.23609100 | -0.63267600 |
| C | 0.32853800  | -4.81104500 | -1.88166700 |
| C | -0.05852600 | -4.75938100 | 0.50277000  |
| C | -0.54601600 | -5.89269700 | -1.99324700 |
| H | 0.79424800  | -4.39779300 | -2.76880500 |
| C | -0.93408900 | -5.83647700 | 0.39012100  |
| H | 0.11026800  | -4.30305100 | 1.47428900  |
| C | -1.18159200 | -6.40454900 | -0.86222400 |
| H | -0.74147000 | -6.32509000 | -2.97006300 |
| H | -1.43308700 | -6.22257900 | 1.27368500  |
| H | -1.86998800 | -7.23924900 | -0.95401000 |
| C | 2.41290700  | -2.43832700 | -2.02953900 |
| C | 3.28414800  | -3.30622400 | -2.70700500 |
| C | 2.08930400  | -1.20356100 | -2.60782800 |
| C | 3.81995500  | -2.93755900 | -3.93926000 |
| H | 3.54230900  | -4.26963600 | -2.27785200 |
| C | 2.62425800  | -0.83424100 | -3.84176200 |
| H | 1.42804900  | -0.52639300 | -2.08090500 |
| C | 3.49089300  | -1.70198900 | -4.50499100 |
| H | 4.49709400  | -3.61109200 | -4.45657400 |
| H | 2.38125800  | 0.13890000  | -4.25492300 |
| H | 3.91859300  | -1.41486500 | -5.46111000 |
| C | 3.57840300  | 0.88162300  | 2.61390100  |
| C | 3.85669700  | 0.52364400  | 3.93877300  |
| C | 3.39569800  | 2.23557000  | 2.29335300  |
| C | 3.95599300  | 1.50332400  | 4.92664100  |
| H | 3.97780900  | -0.51775500 | 4.21438400  |
| C | 3.49888800  | 3.21056500  | 3.28191400  |
| H | 3.15966800  | 2.52269300  | 1.27392400  |
| C | 3.77958000  | 2.84749000  | 4.60101000  |
| H | 4.16173600  | 1.21211600  | 5.95212500  |
| H | 3.35504200  | 4.25477200  | 3.02122000  |
| H | 3.85350400  | 3.60879400  | 5.37182900  |
| C | 4.41117900  | 0.25750700  | -0.03577300 |
| C | 5.79754700  | 0.03484900  | -0.00476300 |
| C | 3.85939600  | 1.01641600  | -1.07384400 |

|    |             |             |             |
|----|-------------|-------------|-------------|
| C  | 6.61337700  | 0.55138200  | -1.00784300 |
| H  | 6.24690500  | -0.53497100 | 0.80195000  |
| C  | 4.68223300  | 1.54419800  | -2.07149300 |
| H  | 2.79258400  | 1.20487600  | -1.10987800 |
| C  | 6.05497400  | 1.30678100  | -2.04256700 |
| H  | 7.68369000  | 0.36819700  | -0.97983200 |
| H  | 4.22529400  | 2.12158200  | -2.86625900 |
| H  | 6.69264300  | 1.70867100  | -2.82466800 |
| Pd | 1.00085800  | -0.82526700 | 0.78719900  |
| C  | 0.43366500  | 1.58243600  | 4.35161700  |
| C  | 0.51369500  | 0.49800600  | 3.46783400  |
| C  | 0.66030700  | -0.79717900 | 3.98168200  |
| C  | 0.72705200  | -1.00829900 | 5.35689200  |
| C  | 0.65378600  | 0.07957700  | 6.23066200  |
| C  | 0.50756800  | 1.37459800  | 5.72576400  |
| H  | 0.34897300  | 2.58004200  | 3.93524500  |
| H  | 0.83588600  | -2.01519600 | 5.74968200  |
| H  | 0.71306300  | -0.08110400 | 7.30341100  |
| H  | 0.46481200  | 2.22001300  | 6.40641000  |
| H  | 0.72419200  | -1.62470800 | 3.27939600  |
| Cu | -0.81638000 | 2.32823000  | -0.28716000 |
| B  | -3.43338200 | -1.71772500 | 1.24384800  |
| C  | -1.13824900 | -0.94100600 | 0.45125500  |
| C  | -2.85206300 | 2.37645700  | 2.41453500  |
| O  | -4.20949700 | -0.58320800 | 1.10898100  |
| O  | -4.13043100 | -2.86850400 | 0.96935100  |
| C  | -2.71085300 | 2.64086600  | -0.05520200 |
| N  | -3.41050400 | 2.70024300  | 1.10988000  |
| N  | -3.64802400 | 2.87537700  | -1.01264700 |
| C  | -4.75894600 | 2.96792400  | 0.89272000  |
| C  | -4.91259200 | 3.07868700  | -0.46008200 |
| C  | -5.40335200 | -0.97097700 | 0.37185000  |
| C  | -5.50284100 | -2.51286900 | 0.67305400  |
| C  | -3.37688400 | 2.85704600  | -2.44336200 |
| H  | -2.30429000 | 2.76934400  | -2.60295000 |
| H  | -3.73902400 | 3.77813000  | -2.90775800 |
| H  | -3.86986800 | 1.99850900  | -2.90907900 |
| H  | -3.16981400 | 3.11519400  | 3.15457200  |
| H  | -1.76719200 | 2.38272900  | 2.33645400  |
| H  | -3.18964200 | 1.38167200  | 2.71851000  |
| C  | -1.44278400 | -1.36244400 | -0.95198500 |
| C  | -1.99456800 | -2.60913500 | -1.29492100 |
| C  | -2.33577900 | -2.90936800 | -2.61677200 |
| C  | -2.12733200 | -1.98322700 | -3.63733100 |
| C  | -1.23865500 | -0.44607700 | -2.00275200 |
| C  | -1.56788300 | -0.74065900 | -3.31953000 |
| H  | -2.18189000 | -3.35045400 | -0.53143900 |
| H  | -1.38309400 | 0.00809800  | -4.08326300 |

|   |             |             |             |
|---|-------------|-------------|-------------|
| H | -1.42371300 | 0.11131500  | 0.51859100  |
| H | -2.76029000 | -3.88402200 | -2.84091500 |
| H | -2.39374400 | -2.22278800 | -4.66280600 |
| H | -0.80511900 | 0.52079100  | -1.78268300 |
| C | -5.12652500 | -0.64407200 | -1.09957000 |
| H | -6.00620800 | -0.83041400 | -1.72321100 |
| H | -4.86441200 | 0.41368500  | -1.16805500 |
| H | -4.28604700 | -1.21958800 | -1.49043300 |
| C | -6.59150400 | -0.15779100 | 0.86989500  |
| H | -6.45468200 | 0.88840400  | 0.59367900  |
| H | -7.51858700 | -0.51358800 | 0.40894400  |
| H | -6.69739300 | -0.21922800 | 1.95451600  |
| C | -5.96944100 | -3.35894200 | -0.50672300 |
| H | -5.99387100 | -4.41277300 | -0.21531100 |
| H | -6.97725700 | -3.06878000 | -0.82130800 |
| H | -5.29053500 | -3.25581800 | -1.35432500 |
| C | -6.31948200 | -2.83853200 | 1.92665100  |
| H | -7.38871600 | -2.66748200 | 1.77253400  |
| H | -6.17091200 | -3.89189000 | 2.17827700  |
| H | -5.98721700 | -2.23774100 | 2.77759600  |
| C | -1.89571500 | -1.69931300 | 1.56125600  |
| H | -1.53655800 | -2.72762100 | 1.66704800  |
| H | -1.70101400 | -1.20118700 | 2.51704600  |
| C | 0.48441500  | 0.72728900  | 1.98427600  |
| O | 0.20624600  | 1.86933400  | 1.59016800  |
| S | 0.81728600  | 2.71291900  | -2.87581600 |
| O | 2.08801700  | 2.46945400  | -3.57281500 |
| O | -0.41819500 | 2.36530500  | -3.59957900 |
| C | 0.72186700  | 4.55494900  | -2.65851700 |
| F | 0.73919800  | 5.16934200  | -3.84544600 |
| F | 1.74963100  | 4.99774100  | -1.92481100 |
| F | -0.42275800 | 4.88296000  | -2.02590500 |
| O | 0.84304700  | 2.24492800  | -1.43625600 |
| C | -6.11947900 | 3.34802500  | -1.29119500 |
| H | -6.01160800 | 4.26321100  | -1.88455600 |
| H | -6.31889400 | 2.52620500  | -1.98856800 |
| H | -6.99913200 | 3.46516100  | -0.65459500 |
| C | -5.73546700 | 3.10901300  | 2.00882500  |
| H | -5.77318900 | 2.20471400  | 2.62504300  |
| H | -5.48026300 | 3.94933000  | 2.66508300  |
| H | -6.73870100 | 3.28760100  | 1.61629100  |

**COM<sub>5-7b</sub>**

|   |             |            |             |
|---|-------------|------------|-------------|
| P | -2.97796700 | 0.39785700 | -1.46787800 |
| C | -3.77165900 | 1.71591600 | -2.51116300 |
| H | -3.19268000 | 1.78133100 | -3.43294200 |
| H | -4.77734700 | 1.39232200 | -2.78627500 |

|   |             |             |             |
|---|-------------|-------------|-------------|
| C | -3.82966700 | 3.08515900  | -1.80441100 |
| H | -4.54639000 | 3.70694300  | -2.35302100 |
| H | -4.23096300 | 2.96765600  | -0.79582200 |
| C | -2.49385700 | 3.85315400  | -1.76839300 |
| H | -2.68046900 | 4.90820000  | -1.50076900 |
| H | -2.04374100 | 3.86608600  | -2.76178300 |
| P | -1.20716900 | 3.19330000  | -0.61001400 |
| C | -3.10002200 | -1.07058000 | -2.54617600 |
| C | -3.95628600 | -2.15742200 | -2.29982000 |
| C | -2.25010600 | -1.11564000 | -3.66765300 |
| C | -3.98862800 | -3.24444600 | -3.18181200 |
| H | -4.59098500 | -2.15212100 | -1.42705000 |
| C | -2.29010600 | -2.19707600 | -4.54176100 |
| H | -1.53879400 | -0.30820000 | -3.82241400 |
| C | -3.16248100 | -3.25904300 | -4.30151100 |
| H | -4.64353200 | -4.08178300 | -2.97149000 |
| H | -1.62619200 | -2.22369100 | -5.40395100 |
| H | -3.17929700 | -4.11299500 | -4.98193400 |
| C | -4.18563200 | 0.18897700  | -0.12170100 |
| C | -5.56417900 | 0.01672700  | -0.35752500 |
| C | -3.71556300 | 0.24039900  | 1.19628200  |
| C | -6.44974000 | -0.10448200 | 0.71338400  |
| H | -5.94575000 | -0.03145900 | -1.37358000 |
| C | -4.60428000 | 0.13346900  | 2.26900500  |
| H | -2.66618700 | 0.36176300  | 1.38970900  |
| C | -5.96937400 | -0.04453400 | 2.02698000  |
| H | -7.51346600 | -0.23843400 | 0.52552900  |
| H | -4.20151300 | 0.15698300  | 3.27494600  |
| H | -6.66401500 | -0.13175100 | 2.85844600  |
| C | 0.15425500  | 4.40526200  | -0.76828600 |
| C | 0.63278200  | 4.76722300  | -2.03588700 |
| C | 0.84498700  | 4.85081400  | 0.37236100  |
| C | 1.76990800  | 5.55100100  | -2.17156300 |
| H | 0.14215800  | 4.39372100  | -2.93251000 |
| C | 1.98535800  | 5.64211300  | 0.23286000  |
| H | 0.49538600  | 4.57271100  | 1.35702300  |
| C | 2.45698600  | 5.98641900  | -1.03164500 |
| H | 2.13812800  | 5.81008100  | -3.15920800 |
| H | 2.50943700  | 5.97517800  | 1.12342200  |
| H | 3.35181600  | 6.59341100  | -1.12930800 |
| C | -1.86616300 | 3.41536200  | 1.06990700  |
| C | -2.90357900 | 4.32164500  | 1.36403300  |
| C | -1.31200500 | 2.62907900  | 2.09288900  |
| C | -3.38155500 | 4.41929200  | 2.66598400  |
| H | -3.33709700 | 4.94107000  | 0.58595400  |
| C | -1.79369800 | 2.75496200  | 3.39646300  |
| H | -0.53133200 | 1.91972800  | 1.87029100  |
| C | -2.82716000 | 3.63626200  | 3.68067400  |



|    |             |             |             |
|----|-------------|-------------|-------------|
| H  | -4.19456600 | 5.11463200  | 2.88664600  |
| H  | -1.37650800 | 2.12278600  | 4.16931100  |
| H  | -3.21345000 | 3.71919000  | 4.70291500  |
| Pd | -0.67549700 | 1.00738500  | -0.96038600 |
| C  | 3.56802100  | 1.88352600  | -1.40387400 |
| C  | 2.20025800  | 1.73784800  | -1.65393200 |
| C  | 1.71429700  | 1.86558400  | -2.96286200 |
| C  | 2.59209300  | 2.14399500  | -4.01472300 |
| C  | 3.95601800  | 2.29942700  | -3.74953800 |
| C  | 4.44698100  | 2.15576600  | -2.44558000 |
| H  | 3.91377000  | 1.73464400  | -0.39000700 |
| H  | 2.21952600  | 2.24636800  | -5.02994600 |
| H  | 4.64390600  | 2.51999400  | -4.56081800 |
| H  | 5.50984400  | 2.25232700  | -2.24551600 |
| H  | 0.64921100  | 1.73918900  | -3.14308500 |
| Cu | -1.01643300 | -1.95087200 | 0.32384100  |
| C  | -3.81126100 | -3.45023300 | 1.63183100  |
| C  | -1.96664400 | -3.58403700 | -0.02638500 |
| N  | -3.10756100 | -4.09135200 | 0.51167200  |
| N  | -1.64142000 | -4.47329200 | -1.00708900 |
| C  | -3.49883600 | -5.24784800 | -0.12376800 |
| C  | -2.57413100 | -5.49370500 | -1.08701800 |
| C  | -0.52049200 | -4.25515100 | -1.91631200 |
| H  | -4.37607500 | -5.81649800 | 0.17678300  |
| H  | -2.49209600 | -6.29787200 | -1.80086300 |
| H  | -0.86210800 | -3.45356600 | -2.74369900 |
| H  | -0.25925700 | -5.33200500 | -2.40050500 |
| H  | 0.41076100  | -3.82404500 | -1.28907800 |
| H  | -4.43656200 | -4.20152300 | 2.12511200  |
| H  | -4.45372900 | -2.63662800 | 1.27082500  |
| H  | -3.07652800 | -3.06441900 | 2.32871500  |
| C  | 1.26304400  | 1.48985000  | -0.51666000 |
| O  | 1.61429300  | 1.51866600  | 0.64212500  |
| B  | 3.41972400  | -1.56383800 | 1.09603200  |
| C  | 2.17882700  | -1.80028900 | -1.14874700 |
| O  | 4.06709600  | -0.39144500 | 0.79285300  |
| O  | 4.00195700  | -2.24010300 | 2.13822600  |
| C  | 5.01795300  | -0.12326000 | 1.85098700  |
| C  | 5.23127200  | -1.55129400 | 2.48354700  |
| C  | 3.43526500  | -2.09256600 | -1.86884300 |
| C  | 3.84319500  | -1.33520700 | -2.98413200 |
| C  | 5.05132400  | -1.58909200 | -3.62598300 |
| C  | 5.90214300  | -2.59861700 | -3.16850300 |
| C  | 4.30833000  | -3.09130500 | -1.41667300 |
| C  | 5.52211400  | -3.35103300 | -2.05644200 |
| H  | 3.22801800  | -0.50986900 | -3.32115000 |
| H  | 6.17204300  | -4.13762100 | -1.67227700 |
| H  | 5.34232700  | -0.98438900 | -4.47381800 |

|   |             |             |             |
|---|-------------|-------------|-------------|
| H | 6.85060100  | -2.78680800 | -3.66304600 |
| H | 4.03523600  | -3.68646000 | -0.54089200 |
| C | 4.36143200  | 0.87926500  | 2.79884600  |
| H | 5.04028400  | 1.18812900  | 3.58965700  |
| H | 4.06711400  | 1.76139900  | 2.21527800  |
| H | 3.45470000  | 0.46606400  | 3.24136200  |
| C | 6.26816700  | 0.48979400  | 1.21701300  |
| H | 6.04269700  | 1.48080200  | 0.81774300  |
| H | 7.05932100  | 0.60898900  | 1.96442000  |
| H | 6.64364200  | -0.13518700 | 0.40775100  |
| C | 5.37375300  | -1.56238800 | 4.00106900  |
| H | 5.50849900  | -2.59020200 | 4.34928700  |
| H | 6.24390800  | -0.97765600 | 4.30709800  |
| H | 4.48114400  | -1.15845500 | 4.48046500  |
| C | 6.36952700  | -2.33878400 | 1.82697900  |
| H | 7.34854100  | -1.93250200 | 2.07202500  |
| H | 6.32059300  | -3.37235900 | 2.18162000  |
| H | 6.26224400  | -2.34907900 | 0.73936900  |
| C | 2.13120100  | -2.05438200 | 0.33928600  |
| H | 1.29570000  | -1.49988000 | 0.78475200  |
| H | 1.95251600  | -3.11562900 | 0.58102300  |
| C | 1.11337400  | -1.29300500 | -1.81183100 |
| O | -0.08101800 | -0.99375900 | -1.28564100 |
| H | 1.19086000  | -1.11771000 | -2.88670000 |
| S | -0.93990100 | -1.08194300 | 3.26901200  |
| O | -1.97485400 | -0.30020600 | 3.96636500  |
| O | -1.01605000 | -2.54757500 | 3.39665300  |
| C | 0.64485200  | -0.58712800 | 4.09419800  |
| F | 0.58732400  | -0.85024500 | 5.40459100  |
| F | 0.85347300  | 0.73443700  | 3.94439500  |
| F | 1.68517900  | -1.23782200 | 3.57406300  |
| O | -0.68038300 | -0.60328700 | 1.85767900  |

## TS10

|   |            |             |             |
|---|------------|-------------|-------------|
| P | 2.62065000 | 0.97839500  | -1.21106700 |
| C | 3.06317700 | 0.37857900  | -2.91923800 |
| H | 2.12396300 | 0.20167900  | -3.45437900 |
| H | 3.59816500 | 1.16775600  | -3.45585200 |
| C | 3.91544900 | -0.90198900 | -2.89885500 |
| H | 4.35447600 | -1.03004200 | -3.89529800 |
| H | 4.75765900 | -0.76837300 | -2.21254600 |
| C | 3.16414200 | -2.20223800 | -2.57196000 |
| H | 3.80541600 | -3.06644800 | -2.77580500 |
| H | 2.29827400 | -2.29778200 | -3.23495100 |
| P | 2.48725800 | -2.39390300 | -0.85473400 |
| C | 1.96201600 | 2.65340500  | -1.54171200 |
| C | 2.43264700 | 3.77717200  | -0.84813600 |
| C | 0.91630200 | 2.81176800  | -2.46390000 |

|    |             |             |             |
|----|-------------|-------------|-------------|
| C  | 1.88440900  | 5.03616900  | -1.09491300 |
| H  | 3.22462400  | 3.66470700  | -0.11656400 |
| C  | 0.37299800  | 4.07043800  | -2.70765300 |
| H  | 0.51122900  | 1.94750000  | -2.97721700 |
| C  | 0.85720200  | 5.18803200  | -2.02524700 |
| H  | 2.25972400  | 5.90035500  | -0.55478200 |
| H  | -0.43534100 | 4.17548300  | -3.42513300 |
| H  | 0.42626700  | 6.16804800  | -2.20503300 |
| C  | 4.28730900  | 1.28108200  | -0.51058300 |
| C  | 5.26416400  | 1.99763900  | -1.22187700 |
| C  | 4.61368200  | 0.73274900  | 0.73441300  |
| C  | 6.54769900  | 2.14569000  | -0.70140300 |
| H  | 5.01900000  | 2.44845700  | -2.17904700 |
| C  | 5.90136900  | 0.87823900  | 1.25296800  |
| H  | 3.85440400  | 0.20697800  | 1.29717900  |
| C  | 6.86935800  | 1.57910400  | 0.53581400  |
| H  | 7.29663700  | 2.70142200  | -1.25812200 |
| H  | 6.14053200  | 0.43648500  | 2.21450900  |
| H  | 7.87211100  | 1.69070300  | 0.93817200  |
| C  | 1.77196800  | -4.07926300 | -0.92527600 |
| C  | 0.84967200  | -4.39293900 | -1.93557500 |
| C  | 2.02311200  | -5.01839900 | 0.08257300  |
| C  | 0.20052900  | -5.62414000 | -1.94354400 |
| H  | 0.60203900  | -3.66272900 | -2.69845400 |
| C  | 1.36669600  | -6.24906100 | 0.07505000  |
| H  | 2.71963500  | -4.78445900 | 0.87919400  |
| C  | 0.45551800  | -6.55502500 | -0.93539000 |
| H  | -0.52526200 | -5.84274900 | -2.72000300 |
| H  | 1.56615400  | -6.96640800 | 0.86542600  |
| H  | -0.06184000 | -7.50957200 | -0.93271800 |
| C  | 3.93548200  | -2.55659200 | 0.24860000  |
| C  | 5.23205500  | -2.80577700 | -0.21764000 |
| C  | 3.71502500  | -2.38957000 | 1.62681000  |
| C  | 6.29988300  | -2.87145300 | 0.67776100  |
| H  | 5.42107100  | -2.94128500 | -1.27699400 |
| C  | 4.78273700  | -2.47916500 | 2.51798400  |
| H  | 2.71326100  | -2.17910700 | 1.99064800  |
| C  | 6.07685700  | -2.71053300 | 2.04549000  |
| H  | 7.30458700  | -3.04812300 | 0.30574900  |
| H  | 4.60247000  | -2.34949900 | 3.58067200  |
| H  | 6.90940400  | -2.76293800 | 2.74089300  |
| Pd | 1.15458100  | -0.67611200 | -0.15120600 |
| C  | -1.68788500 | -3.87478300 | 0.68735000  |
| C  | -1.08214700 | -2.75687700 | 0.09546600  |
| C  | -1.50566300 | -2.32718100 | -1.16358900 |
| C  | -2.54225500 | -2.98618200 | -1.82025800 |
| C  | -3.13338800 | -4.10418100 | -1.23376000 |
| C  | -2.69740500 | -4.55472400 | 0.01663400  |

|    |             |             |             |
|----|-------------|-------------|-------------|
| H  | -1.32953300 | -4.20280600 | 1.65673100  |
| H  | -2.89219500 | -2.62546200 | -2.78184500 |
| H  | -3.93542600 | -4.62602600 | -1.74805800 |
| H  | -3.14781300 | -5.43639400 | 0.46403600  |
| I  | 1.19519600  | 1.03486900  | 2.37078700  |
| H  | -1.00253400 | -1.48564600 | -1.61836100 |
| Cu | -0.33509100 | 2.40957100  | 0.65342700  |
| C  | 0.82429000  | 5.08729400  | 2.33064900  |
| C  | -0.88297100 | 4.27255700  | 0.71120900  |
| N  | -0.29665700 | 5.27868000  | 1.42144200  |
| N  | -1.85160900 | 4.90850100  | -0.00840300 |
| C  | -0.87018700 | 6.50783800  | 1.13851500  |
| C  | -1.85697100 | 6.27315500  | 0.23483300  |
| C  | -2.75856200 | 4.24546800  | -0.93467200 |
| H  | -0.53911700 | 7.42298700  | 1.60336900  |
| H  | -2.55640300 | 6.94320100  | -0.23947000 |
| H  | -2.67513300 | 4.69841600  | -1.92631100 |
| H  | -3.79122200 | 4.32928900  | -0.58567100 |
| H  | -2.48903700 | 3.19244200  | -1.00088000 |
| H  | 0.58753300  | 5.51072100  | 3.31033200  |
| H  | 1.72128300  | 5.57049000  | 1.93259500  |
| H  | 1.00616000  | 4.01653500  | 2.42943400  |
| C  | 0.07156200  | -2.11864600 | 0.79848500  |
| O  | 0.42256200  | -2.48867100 | 1.89985500  |
| B  | -4.25617600 | -0.17369800 | 1.07981400  |
| C  | -2.88950200 | 0.75061900  | -0.91968900 |
| O  | -4.31599300 | -1.51337100 | 0.78933800  |
| O  | -5.29269700 | 0.24496100  | 1.88510400  |
| C  | -5.34220700 | -2.09671800 | 1.63237100  |
| C  | -6.23699100 | -0.85309300 | 1.98539200  |
| C  | -4.03074200 | 0.74971900  | -1.84389400 |
| C  | -3.95234900 | 0.21216300  | -3.14745200 |
| C  | -5.04295200 | 0.23516300  | -4.01030400 |
| C  | -6.26460900 | 0.77715200  | -3.59971100 |
| C  | -5.27392700 | 1.28617000  | -1.44799200 |
| C  | -6.37031100 | 1.29711600  | -2.30981100 |
| H  | -3.02725300 | -0.25048800 | -3.47521400 |
| H  | -7.31287900 | 1.71622600  | -1.96749300 |
| H  | -4.94661100 | -0.19253000 | -5.00501200 |
| H  | -7.11890500 | 0.78206200  | -4.26988400 |
| H  | -5.38351900 | 1.69376700  | -0.44865000 |
| C  | -4.62505200 | -2.68918300 | 2.84882800  |
| H  | -5.31943500 | -3.21286200 | 3.51268600  |
| H  | -3.87174200 | -3.39714800 | 2.49748300  |
| H  | -4.11338400 | -1.91027200 | 3.42028100  |
| C  | -6.05849800 | -3.19247600 | 0.85181200  |
| H  | -5.36872000 | -4.01672900 | 0.66161100  |
| H  | -6.90982700 | -3.57815300 | 1.42237200  |

|   |             |             |             |
|---|-------------|-------------|-------------|
| H | -6.41669700 | -2.82260300 | -0.11001200 |
| C | -6.82586700 | -0.86100300 | 3.39134700  |
| H | -7.41287900 | 0.04834000  | 3.54803100  |
| H | -7.48856300 | -1.72161800 | 3.52950600  |
| H | -6.04458400 | -0.89438700 | 4.15192600  |
| C | -7.33680100 | -0.58859500 | 0.95154800  |
| H | -8.13197600 | -1.33742400 | 1.01159600  |
| H | -7.77386000 | 0.39453300  | 1.14774800  |
| H | -6.93343900 | -0.58083200 | -0.06330800 |
| C | -3.12873100 | 0.79025800  | 0.57507400  |
| H | -2.18886200 | 0.50910500  | 1.06702600  |
| H | -3.35235800 | 1.81017700  | 0.92328500  |
| C | -1.61051000 | 0.78347200  | -1.38717000 |
| O | -0.52577200 | 0.85601600  | -0.64410100 |
| H | -1.44782800 | 0.77737500  | -2.47457600 |

9'

|   |             |             |             |
|---|-------------|-------------|-------------|
| P | -2.76486300 | -0.02349700 | -1.43865400 |
| C | -3.55631400 | 1.08921200  | -2.70366200 |
| H | -2.85525200 | 1.15835300  | -3.54319500 |
| H | -4.46283300 | 0.60727000  | -3.08288800 |
| C | -3.89656400 | 2.48592800  | -2.16039800 |
| H | -4.59471200 | 2.96020800  | -2.86003200 |
| H | -4.43698000 | 2.38693700  | -1.21343700 |
| C | -2.70688200 | 3.44416800  | -1.99344000 |
| H | -3.06664400 | 4.45771500  | -1.78692900 |
| H | -2.14667400 | 3.50317600  | -2.93274400 |
| P | -1.45265400 | 3.02452200  | -0.69518700 |
| C | -2.68654200 | -1.61339700 | -2.33709000 |
| C | -3.60877600 | -2.65363000 | -2.17197900 |
| C | -1.61996100 | -1.77664700 | -3.23413500 |
| C | -3.48225200 | -3.82777600 | -2.91377700 |
| H | -4.41583800 | -2.55611100 | -1.45550000 |
| C | -1.50245600 | -2.94629300 | -3.98157400 |
| H | -0.87036500 | -0.99757200 | -3.32034200 |
| C | -2.43523400 | -3.97385000 | -3.82434400 |
| H | -4.19657100 | -4.63207200 | -2.77103000 |
| H | -0.67274900 | -3.06223800 | -4.67241600 |
| H | -2.33986700 | -4.88860300 | -4.40212300 |
| C | -4.07855900 | -0.15243400 | -0.17615400 |
| C | -5.42906900 | -0.38518200 | -0.48885900 |
| C | -3.71225800 | 0.06465900  | 1.15711600  |
| C | -6.38719500 | -0.41872100 | 0.52289400  |
| H | -5.73474800 | -0.53962900 | -1.51931600 |
| C | -4.67321100 | 0.03816300  | 2.16805200  |
| H | -2.67394000 | 0.23176200  | 1.41469600  |
| C | -6.00906500 | -0.20619300 | 1.85341500  |
| H | -7.42832300 | -0.60395100 | 0.27524100  |

|    |             |             |             |
|----|-------------|-------------|-------------|
| H  | -4.36261600 | 0.20651400  | 3.19355600  |
| H  | -6.75962300 | -0.22789600 | 2.63816400  |
| C  | -0.29669900 | 4.43849500  | -0.81377000 |
| C  | 0.32918400  | 4.70922400  | -2.03965500 |
| C  | 0.05217100  | 5.19176400  | 0.31369300  |
| C  | 1.28462100  | 5.71709300  | -2.13740400 |
| H  | 0.09576300  | 4.11621900  | -2.91716900 |
| C  | 1.01199700  | 6.19861200  | 0.21300200  |
| H  | -0.41344100 | 4.98276700  | 1.26970700  |
| C  | 1.63077100  | 6.46256400  | -1.00900700 |
| H  | 1.76963500  | 5.90729400  | -3.08976400 |
| H  | 1.28013600  | 6.77231200  | 1.09488100  |
| H  | 2.38360000  | 7.24149300  | -1.08166000 |
| C  | -2.28154200 | 3.20720900  | 0.91532500  |
| C  | -3.52366400 | 3.83699700  | 1.07529400  |
| C  | -1.63558500 | 2.64536400  | 2.02853000  |
| C  | -4.12041900 | 3.89109100  | 2.33407900  |
| H  | -4.03325100 | 4.28091900  | 0.22677200  |
| C  | -2.23339900 | 2.71324100  | 3.28574400  |
| H  | -0.68314500 | 2.13608500  | 1.91236500  |
| C  | -3.47608900 | 3.32992000  | 3.43897200  |
| H  | -5.08882700 | 4.36828300  | 2.45067900  |
| H  | -1.73351500 | 2.25030800  | 4.12970700  |
| H  | -3.94656800 | 3.36883900  | 4.41703600  |
| Pd | -0.58717000 | 0.91454200  | -0.83295800 |
| C  | 3.57693500  | 1.97226300  | -1.20475100 |
| C  | 2.21445300  | 1.84193200  | -1.49949300 |
| C  | 1.78562900  | 1.87327500  | -2.83058300 |
| C  | 2.70186300  | 2.07956400  | -3.85979600 |
| C  | 4.05875100  | 2.22909600  | -3.56001700 |
| C  | 4.49475900  | 2.15866200  | -2.23449300 |
| H  | 3.88925400  | 1.89072000  | -0.17255600 |
| H  | 2.36383700  | 2.11810200  | -4.89143000 |
| H  | 4.77743300  | 2.37937000  | -4.36042200 |
| H  | 5.55327200  | 2.23807300  | -2.00716500 |
| I  | -0.50546200 | -0.80407100 | 3.03662700  |
| H  | 0.72672600  | 1.74008200  | -3.03957000 |
| Cu | -0.69086900 | -1.94748100 | 0.70200600  |
| C  | -3.61345300 | -3.36488100 | 1.69807300  |
| C  | -1.60379500 | -3.63106000 | 0.26647800  |
| N  | -2.77455400 | -4.11186600 | 0.77061600  |
| N  | -1.16321200 | -4.63248000 | -0.54430600 |
| C  | -3.06059900 | -5.37712500 | 0.28161600  |
| C  | -2.03629900 | -5.70835500 | -0.54825300 |
| C  | 0.10365000  | -4.59403900 | -1.26241100 |
| H  | -3.94844200 | -5.92088100 | 0.56292700  |
| H  | -1.85427300 | -6.60039900 | -1.12601900 |
| H  | -0.04737000 | -4.93120700 | -2.28956400 |

|   |             |             |             |
|---|-------------|-------------|-------------|
| H | 0.84234500  | -5.23205400 | -0.76865900 |
| H | 0.46735900  | -3.56871000 | -1.27340900 |
| H | -4.02015800 | -4.04470100 | 2.45068400  |
| H | -4.43410800 | -2.87040000 | 1.17130900  |
| H | -2.99139800 | -2.61339800 | 2.18574400  |
| C | 1.23140500  | 1.70944200  | -0.37830400 |
| O | 1.49655900  | 2.03171100  | 0.75790800  |
| B | 3.45481600  | -1.44851600 | 1.52038800  |
| C | 2.55158600  | -1.79705100 | -0.85484100 |
| O | 3.72397500  | -0.11250300 | 1.35256100  |
| O | 4.10658200  | -1.99569200 | 2.59938600  |
| C | 4.37909200  | 0.34237400  | 2.56632200  |
| C | 5.02408300  | -0.98574800 | 3.09954200  |
| C | 3.84147900  | -1.92989300 | -1.55982200 |
| C | 4.13956200  | -1.22734000 | -2.74706600 |
| C | 5.37780400  | -1.33980600 | -3.36753400 |
| C | 6.37955400  | -2.14965500 | -2.82426800 |
| C | 4.86937500  | -2.73266400 | -1.02263800 |
| C | 6.11446600  | -2.83973500 | -1.64272100 |
| H | 3.41020100  | -0.54834600 | -3.16979600 |
| H | 6.87961300  | -3.46782000 | -1.19416000 |
| H | 5.56969100  | -0.76958800 | -4.27288100 |
| H | 7.34958300  | -2.22844200 | -3.30621400 |
| H | 4.69942400  | -3.27823900 | -0.10165100 |
| C | 3.28166000  | 0.89667800  | 3.47709000  |
| H | 3.70107800  | 1.34026300  | 4.38573400  |
| H | 2.72876600  | 1.65874300  | 2.92448900  |
| H | 2.56765300  | 0.11717900  | 3.75379000  |
| C | 5.37744500  | 1.43623600  | 2.20441600  |
| H | 4.83920400  | 2.32850600  | 1.87210700  |
| H | 5.97972300  | 1.71384300  | 3.07584800  |
| H | 6.04746300  | 1.11713300  | 1.40357700  |
| C | 5.09489400  | -1.09807600 | 4.61670800  |
| H | 5.53562200  | -2.05941600 | 4.89578500  |
| H | 5.72017200  | -0.30183300 | 5.03443800  |
| H | 4.10185200  | -1.03514500 | 5.06350200  |
| C | 6.38692500  | -1.28575400 | 2.46697300  |
| H | 7.16117800  | -0.60555000 | 2.83395800  |
| H | 6.67675200  | -2.30891900 | 2.72158300  |
| H | 6.33625300  | -1.20919800 | 1.37733900  |
| C | 2.48909700  | -2.25061000 | 0.58219100  |
| H | 1.48591900  | -2.07344600 | 0.98846900  |
| H | 2.66752300  | -3.32893000 | 0.68446200  |
| C | 1.48159600  | -1.22535300 | -1.46281800 |
| O | 0.27652500  | -1.02062500 | -0.93090700 |
| H | 1.57003100  | -0.90725800 | -2.50275500 |

|   |             |             |             |
|---|-------------|-------------|-------------|
| P | 0.35829900  | 2.42961600  | -0.51998500 |
| C | 1.71915800  | 3.67103200  | -0.78097300 |
| H | 2.07308600  | 3.51096200  | -1.80524400 |
| H | 1.29306300  | 4.67826100  | -0.75426800 |
| C | 2.88650200  | 3.55478100  | 0.21135300  |
| H | 3.45634200  | 4.49077900  | 0.18058600  |
| H | 2.50605000  | 3.46569700  | 1.23499700  |
| C | 3.86865300  | 2.41237800  | -0.07880600 |
| H | 4.75186800  | 2.50490200  | 0.56133400  |
| H | 4.22098700  | 2.47340000  | -1.11408300 |
| P | 3.18741400  | 0.70046400  | 0.13660700  |
| C | -0.85661500 | 2.98602800  | -1.76640200 |
| C | -2.06747600 | 3.59898800  | -1.42856800 |
| C | -0.55895700 | 2.73604400  | -3.11523200 |
| C | -2.97136200 | 3.95823000  | -2.42955100 |
| H | -2.31303600 | 3.77717800  | -0.38762100 |
| C | -1.45863700 | 3.10580500  | -4.11101200 |
| H | 0.35464600  | 2.20961800  | -3.37790300 |
| C | -2.66938200 | 3.71467300  | -3.76929900 |
| H | -3.91550600 | 4.42149400  | -2.15902300 |
| H | -1.22537700 | 2.89977200  | -5.15113400 |
| H | -3.37745300 | 3.98933000  | -4.54530000 |
| C | -0.35014800 | 2.91314100  | 1.09486100  |
| C | -0.25349500 | 4.20634600  | 1.63139900  |
| C | -1.02522000 | 1.92517700  | 1.82111100  |
| C | -0.81856700 | 4.49621500  | 2.87307600  |
| H | 0.25633200  | 4.99350800  | 1.08621400  |
| C | -1.59973700 | 2.21774100  | 3.05629000  |
| H | -1.11016500 | 0.92752500  | 1.41404100  |
| C | -1.49260200 | 3.50299600  | 3.58764700  |
| H | -0.73502500 | 5.49911800  | 3.28135000  |
| H | -2.12118600 | 1.43304200  | 3.59495300  |
| H | -1.93113400 | 3.73345800  | 4.55407300  |
| C | 4.67401300  | -0.32780600 | -0.13609800 |
| C | 5.33263200  | -0.23327600 | -1.37141400 |
| C | 5.08758600  | -1.29310300 | 0.78973600  |
| C | 6.39700100  | -1.08081500 | -1.66710000 |
| H | 4.98897500  | 0.47288300  | -2.12067100 |
| C | 6.14595100  | -2.14801600 | 0.48479500  |
| H | 4.56884000  | -1.39261400 | 1.73614300  |
| C | 6.80398800  | -2.04255600 | -0.74028000 |
| H | 6.89595000  | -1.00234500 | -2.62807400 |
| H | 6.44740600  | -2.90464100 | 1.20242400  |
| H | 7.62313000  | -2.71438300 | -0.97773600 |
| C | 2.82296300  | 0.58220100  | 1.92376700  |
| C | 1.61461900  | -0.00206500 | 2.32546700  |
| C | 3.71471600  | 1.05433800  | 2.89990400  |
| C | 1.29711800  | -0.11627600 | 3.67867700  |



|    |             |             |             |
|----|-------------|-------------|-------------|
| H  | 0.91681500  | -0.36007500 | 1.57659500  |
| C  | 3.39406900  | 0.94610400  | 4.25159100  |
| H  | 4.66342900  | 1.49448400  | 2.60769000  |
| C  | 2.18512500  | 0.36125900  | 4.64155400  |
| H  | 0.35563100  | -0.57507900 | 3.96210400  |
| H  | 4.08694500  | 1.31557900  | 5.00165800  |
| H  | 1.93986500  | 0.28019100  | 5.69635300  |
| Pd | 1.30264500  | 0.21437600  | -1.06784600 |
| C  | 2.29554500  | -1.27061400 | -2.02864800 |
| O  | 2.58824900  | -1.03336200 | -3.17980000 |
| C  | 2.66657200  | -2.55392800 | -1.35772100 |
| C  | 2.26266800  | -2.82856500 | -0.04976900 |
| C  | 3.50278300  | -3.45582400 | -2.03021600 |
| C  | 2.68345200  | -3.99378500 | 0.58645900  |
| H  | 1.62320600  | -2.12046600 | 0.46044000  |
| C  | 3.93030700  | -4.61638200 | -1.39278600 |
| H  | 3.81424400  | -3.21517100 | -3.04081300 |
| C  | 3.52114700  | -4.88725000 | -0.08337800 |
| H  | 2.36728600  | -4.19810900 | 1.60506700  |
| H  | 4.58662700  | -5.30970800 | -1.91059100 |
| H  | 3.85824400  | -5.79262800 | 0.41324400  |
| B  | -4.93652400 | -0.47399200 | -0.47692100 |
| C  | -2.40155200 | -0.23760900 | -0.67645500 |
| O  | -5.16339800 | -1.58377400 | -1.25329100 |
| O  | -5.83606500 | -0.35776100 | 0.55944800  |
| C  | -6.08859600 | -2.43459800 | -0.52955900 |
| C  | -6.82874100 | -1.40578700 | 0.40251300  |
| C  | -2.08742800 | -1.04953000 | 0.50009700  |
| C  | -2.80250300 | -0.88256800 | 1.71257000  |
| C  | -2.51029900 | -1.63910500 | 2.84630000  |
| C  | -1.50231300 | -2.60531500 | 2.81612400  |
| C  | -1.08135400 | -2.04614400 | 0.48801700  |
| C  | -0.80310000 | -2.80531100 | 1.62182400  |
| H  | -3.59708000 | -0.14917200 | 1.77119000  |
| H  | -0.04121500 | -3.57747600 | 1.56455500  |
| H  | -3.08338500 | -1.47671600 | 3.75607200  |
| H  | -1.28075800 | -3.20393300 | 3.69489900  |
| H  | -0.54737200 | -2.21845400 | -0.43618600 |
| C  | -5.23503900 | -3.44679300 | 0.24237100  |
| H  | -5.85462800 | -4.18081400 | 0.76624600  |
| H  | -4.59441500 | -3.97532500 | -0.46788000 |
| H  | -4.58595100 | -2.94773600 | 0.96569900  |
| C  | -6.98240600 | -3.15200700 | -1.53444200 |
| H  | -6.37433700 | -3.81911200 | -2.15133200 |
| H  | -7.73676200 | -3.75665300 | -1.02018600 |
| H  | -7.48915700 | -2.44819400 | -2.19658100 |
| C  | -7.19055600 | -1.93793300 | 1.78429200  |
| H  | -7.67953100 | -1.15133500 | 2.36606800  |

|   |             |             |             |
|---|-------------|-------------|-------------|
| H | -7.88166800 | -2.78353300 | 1.70538600  |
| H | -6.30157700 | -2.26083600 | 2.32797200  |
| C | -8.04910700 | -0.76004400 | -0.25921100 |
| H | -8.87777400 | -1.46715100 | -0.35866400 |
| H | -8.38194000 | 0.08022700  | 0.35592500  |
| H | -7.79742700 | -0.37610900 | -1.25139800 |
| C | -3.72986700 | 0.50539500  | -0.70200800 |
| H | -3.76016300 | 1.31236200  | 0.04480100  |
| H | -3.83046200 | 0.99834900  | -1.67627800 |
| C | -1.58610200 | -0.12359700 | -1.77500700 |
| O | -0.40078400 | -0.64275000 | -1.98224200 |
| H | -1.98568400 | 0.48066600  | -2.60097400 |

## TS11

|   |             |             |             |
|---|-------------|-------------|-------------|
| P | 0.54899800  | 1.95727600  | -1.09927100 |
| C | 1.69659200  | 2.69085900  | -2.36906200 |
| H | 1.45669600  | 2.15895600  | -3.29683300 |
| H | 1.41628400  | 3.73743800  | -2.53411600 |
| C | 3.20707700  | 2.59416000  | -2.08753300 |
| H | 3.71370400  | 3.23096100  | -2.82275200 |
| H | 3.43778200  | 3.02478000  | -1.10806600 |
| C | 3.84079100  | 1.19459000  | -2.18431800 |
| H | 4.93101500  | 1.29138700  | -2.22117900 |
| H | 3.53080100  | 0.69471500  | -3.10827700 |
| P | 3.38937600  | 0.06298100  | -0.77596700 |
| C | -1.07354800 | 2.30528200  | -1.87336900 |
| C | -1.80359200 | 3.47328700  | -1.62030400 |
| C | -1.58726700 | 1.34819200  | -2.75986400 |
| C | -3.02743500 | 3.68568300  | -2.25406200 |
| H | -1.42044000 | 4.20565000  | -0.91751600 |
| C | -2.80065900 | 1.57391200  | -3.40923000 |
| H | -1.04853100 | 0.41822500  | -2.91745900 |
| C | -3.52529700 | 2.73984600  | -3.15260000 |
| H | -3.59317300 | 4.58915200  | -2.04603000 |
| H | -3.18932400 | 0.83164000  | -4.09917200 |
| H | -4.47931300 | 2.90505300  | -3.64389200 |
| C | 0.62155200  | 3.09171300  | 0.33172200  |
| C | 1.36561700  | 4.27706400  | 0.37207100  |
| C | -0.07763200 | 2.68292200  | 1.47876100  |
| C | 1.42713900  | 5.03015500  | 1.54630400  |
| H | 1.90400300  | 4.61966100  | -0.50451900 |
| C | -0.03221700 | 3.44664100  | 2.64141800  |
| H | -0.65339000 | 1.76381300  | 1.45926000  |
| C | 0.73080300  | 4.61690700  | 2.68221100  |
| H | 2.01798200  | 5.94103300  | 1.57071000  |
| H | -0.59165700 | 3.12065800  | 3.51261800  |
| H | 0.77963100  | 5.20555000  | 3.59360500  |
| C | 4.54160200  | -1.34054600 | -0.96832700 |

|    |             |             |             |
|----|-------------|-------------|-------------|
| C  | 4.41165300  | -2.14251800 | -2.11397000 |
| C  | 5.45431400  | -1.71173900 | 0.02663200  |
| C  | 5.21022400  | -3.27187500 | -2.27550300 |
| H  | 3.66077400  | -1.90501700 | -2.86138600 |
| C  | 6.24327200  | -2.85068000 | -0.13422900 |
| H  | 5.53671800  | -1.12391100 | 0.93354300  |
| C  | 6.13115100  | -3.62726500 | -1.28689600 |
| H  | 5.10125800  | -3.88412800 | -3.16559600 |
| H  | 6.94043400  | -3.13406000 | 0.64853900  |
| H  | 6.74601000  | -4.51386400 | -1.40936500 |
| C  | 3.98910600  | 1.01086000  | 0.67204600  |
| C  | 3.10379900  | 1.25059500  | 1.73029300  |
| C  | 5.27408800  | 1.57460100  | 0.71519600  |
| C  | 3.48459100  | 2.05316900  | 2.80543000  |
| H  | 2.10859900  | 0.82172800  | 1.68941000  |
| C  | 5.65813800  | 2.36900400  | 1.79389500  |
| H  | 5.97600100  | 1.38830100  | -0.09226300 |
| C  | 4.76069000  | 2.61418200  | 2.83714900  |
| H  | 2.77602100  | 2.25203600  | 3.60235000  |
| H  | 6.65410400  | 2.80119200  | 1.81935300  |
| H  | 5.05805300  | 3.24388500  | 3.67044700  |
| Pd | 1.14524700  | -0.33832100 | -0.64505900 |
| C  | 1.24483500  | -2.40772200 | -0.60366700 |
| O  | 1.10843500  | -2.92736800 | -1.69312600 |
| C  | 1.94726400  | -2.99268100 | 0.57278500  |
| C  | 1.88100600  | -2.41463400 | 1.84786000  |
| C  | 2.79984100  | -4.07749700 | 0.34431300  |
| C  | 2.66623600  | -2.91845100 | 2.87937900  |
| H  | 1.21164000  | -1.57829400 | 2.01150900  |
| C  | 3.59215900  | -4.57332500 | 1.37933500  |
| H  | 2.85040800  | -4.49968000 | -0.65228600 |
| C  | 3.52948800  | -3.99512700 | 2.64644300  |
| H  | 2.60905500  | -2.47202400 | 3.86789400  |
| H  | 4.26764500  | -5.40205100 | 1.18960800  |
| H  | 4.15035500  | -4.37728400 | 3.45161800  |
| B  | -5.07002300 | -1.51752200 | -0.70315000 |
| C  | -2.56422900 | -1.15271400 | -0.55610200 |
| O  | -5.26204600 | -2.42445900 | 0.30917600  |
| O  | -6.14779300 | -0.68455800 | -0.88719900 |
| C  | -6.43708000 | -2.00258000 | 1.04959800  |
| C  | -7.21484800 | -1.14512000 | -0.01635700 |
| C  | -2.74202900 | -0.15080900 | 0.51361500  |
| C  | -3.49293100 | 1.01808000  | 0.27984100  |
| C  | -3.72735600 | 1.94305400  | 1.29610400  |
| C  | -3.23911800 | 1.71750300  | 2.58446600  |
| C  | -2.23417900 | -0.35032000 | 1.81414600  |
| C  | -2.49121300 | 0.56356200  | 2.83497700  |
| H  | -3.89284500 | 1.20805000  | -0.70858600 |

|   |             |             |             |
|---|-------------|-------------|-------------|
| H | -2.10949800 | 0.36962300  | 3.83408500  |
| H | -4.29709200 | 2.84180100  | 1.07742500  |
| H | -3.43694600 | 2.42982300  | 3.38016300  |
| H | -1.66067200 | -1.24573000 | 2.01547400  |
| C | -5.93350500 | -1.17880400 | 2.23919500  |
| H | -6.75627900 | -0.88026000 | 2.89599700  |
| H | -5.23170400 | -1.78744100 | 2.81426500  |
| H | -5.40165900 | -0.28462200 | 1.90920200  |
| C | -7.17419600 | -3.24341300 | 1.54042100  |
| H | -6.54405000 | -3.78319700 | 2.25238700  |
| H | -8.10329900 | -2.96661500 | 2.04949500  |
| H | -7.41316400 | -3.92112200 | 0.71934800  |
| C | -7.93463600 | 0.07591300  | 0.54481700  |
| H | -8.42986900 | 0.61659300  | -0.26675500 |
| H | -8.69743300 | -0.22187900 | 1.27158900  |
| H | -7.23394600 | 0.75710100  | 1.02957100  |
| C | -8.16491700 | -1.97506700 | -0.88393000 |
| H | -9.03843400 | -2.31126700 | -0.31778400 |
| H | -8.50872800 | -1.36072700 | -1.72029600 |
| H | -7.65600900 | -2.85197200 | -1.29283500 |
| C | -3.72635400 | -1.38227000 | -1.50811800 |
| H | -3.82841900 | -0.56213300 | -2.22964500 |
| H | -3.53537800 | -2.29115800 | -2.09193500 |
| C | -1.43205600 | -1.88431000 | -0.67818200 |
| O | -0.37727700 | -1.78470700 | 0.14334500  |
| H | -1.32153500 | -2.60872100 | -1.49026000 |

## P<sub>2</sub>

|   |             |             |             |
|---|-------------|-------------|-------------|
| C | 3.36089100  | -1.48935900 | -0.32272700 |
| O | 3.39486400  | -2.69502000 | -0.45429800 |
| C | 4.50873800  | -0.63668500 | 0.07371600  |
| C | 4.40679800  | 0.75870900  | 0.16757000  |
| C | 5.72408500  | -1.27224900 | 0.35986300  |
| C | 5.51799900  | 1.50712200  | 0.54917900  |
| H | 3.46564900  | 1.24454100  | -0.06145600 |
| C | 6.83037500  | -0.51893400 | 0.74092400  |
| H | 5.77544300  | -2.35232100 | 0.27808600  |
| C | 6.72808600  | 0.87133100  | 0.83634600  |
| H | 5.44120000  | 2.58767300  | 0.62093000  |
| H | 7.77139100  | -1.01227000 | 0.96359100  |
| H | 7.59168800  | 1.45914000  | 1.13316500  |
| B | -2.53059100 | -1.07747600 | -0.61523300 |
| C | -0.06538800 | -0.70323800 | -1.08183400 |
| O | -2.49444800 | -1.17551600 | 0.75052800  |
| O | -3.70456400 | -0.55832500 | -1.09397500 |
| C | -3.62740000 | -0.42017500 | 1.26358900  |
| C | -4.61243100 | -0.41868500 | 0.03575700  |
| C | -0.20914100 | 0.75102700  | -0.82488200 |

|   |             |             |             |
|---|-------------|-------------|-------------|
| C | -1.06967800 | 1.52490700  | -1.62276800 |
| C | -1.26741000 | 2.88051400  | -1.36142200 |
| C | -0.61920100 | 3.49166500  | -0.28810600 |
| C | 0.43077700  | 1.37998300  | 0.25857700  |
| C | 0.22897900  | 2.73254400  | 0.52129400  |
| H | -1.59349100 | 1.06450900  | -2.45285800 |
| H | 0.72520200  | 3.19259000  | 1.37099100  |
| H | -1.93280000 | 3.45716200  | -1.99722200 |
| H | -0.77797800 | 4.54533800  | -0.07944300 |
| H | 1.06907700  | 0.79494700  | 0.90866700  |
| C | -3.09636900 | 0.97233600  | 1.61692200  |
| H | -3.86901500 | 1.58702500  | 2.08771800  |
| H | -2.26463700 | 0.86268400  | 2.31677400  |
| H | -2.72024800 | 1.49312600  | 0.73425700  |
| C | -4.15327800 | -1.12055000 | 2.51027700  |
| H | -3.39182000 | -1.09112300 | 3.29414900  |
| H | -5.04940200 | -0.61739700 | 2.88743000  |
| H | -4.39544400 | -2.16567400 | 2.31229500  |
| C | -5.40732700 | 0.86874000  | -0.14665300 |
| H | -6.04601500 | 0.78470300  | -1.03019200 |
| H | -6.04871400 | 1.05478700  | 0.72075400  |
| H | -4.74665200 | 1.72567200  | -0.28509400 |
| C | -5.54316600 | -1.63347600 | 0.00201100  |
| H | -6.30556200 | -1.57833200 | 0.78415900  |
| H | -6.04428100 | -1.66869400 | -0.96873900 |
| H | -4.98095600 | -2.56256200 | 0.12807600  |
| C | -1.30579700 | -1.45145800 | -1.53500800 |
| H | -1.55110900 | -1.21098700 | -2.57711900 |
| H | -1.11463900 | -2.53029000 | -1.50366800 |
| C | 1.07489900  | -1.38436100 | -0.90454000 |
| O | 2.23599400  | -0.74171400 | -0.51970600 |
| H | 1.18106900  | -2.45052000 | -1.05799000 |

#### COM<sub>4-R<sub>2</sub></sub>

|   |             |             |             |
|---|-------------|-------------|-------------|
| O | -4.62007000 | -0.71734500 | 0.86137400  |
| C | -5.68850400 | 0.05654600  | 0.30937700  |
| C | -4.93560500 | 1.07077300  | -0.62578000 |
| O | -3.81479200 | 0.29268200  | -1.06944800 |
| B | -3.51740800 | -0.66118500 | -0.04216600 |
| C | -6.47680000 | 0.69732500  | 1.44939700  |
| H | -6.95892500 | -0.08337500 | 2.04546000  |
| H | -5.82078900 | 1.26625600  | 2.11049400  |
| H | -7.25830800 | 1.36340200  | 1.06692100  |
| C | -6.59780900 | -0.89659700 | -0.48155200 |
| H | -6.91539300 | -1.70594400 | 0.18172900  |
| H | -7.49011800 | -0.39396000 | -0.86856400 |
| H | -6.05231100 | -1.33829600 | -1.31969800 |

|    |             |             |             |
|----|-------------|-------------|-------------|
| C  | -5.72509000 | 1.52578800  | -1.85107700 |
| H  | -6.64296600 | 2.04670800  | -1.55752800 |
| H  | -5.11884200 | 2.21695800  | -2.44513300 |
| H  | -5.98979300 | 0.67983200  | -2.48720800 |
| C  | -4.41914700 | 2.29928800  | 0.13846200  |
| H  | -3.77380100 | 2.88016300  | -0.52751200 |
| H  | -5.23742700 | 2.94868900  | 0.46522100  |
| H  | -3.83574500 | 1.99543500  | 1.01005500  |
| C  | -1.56728400 | -2.18940200 | 0.46569600  |
| C  | -2.76000500 | -2.01387500 | -0.49453000 |
| H  | -3.41772800 | -2.88736900 | -0.47970500 |
| H  | -2.39080500 | -1.90321300 | -1.52065200 |
| H  | -1.89661500 | -2.72423000 | 1.37087100  |
| C  | -1.24551800 | -0.77917900 | 0.98953500  |
| O  | -2.21837900 | 0.00568100  | 0.85894700  |
| I  | 3.41216600  | 0.85479400  | -2.01962700 |
| C  | 2.35355600  | 0.15009900  | 2.04104700  |
| C  | 4.61885000  | 0.07711700  | 2.07542400  |
| C  | 4.24154000  | 1.22915000  | 2.69026500  |
| H  | 5.59699600  | -0.32988000 | 1.87563300  |
| H  | 4.82566200  | 2.01402300  | 3.14352500  |
| N  | 2.85580600  | 1.25205700  | 2.66115300  |
| N  | 3.45414400  | -0.56830600 | 1.69697000  |
| Cu | 0.51730200  | -0.28017800 | 1.57721000  |
| C  | -0.34283400 | -2.88561800 | -0.07256400 |
| C  | 0.32621300  | -2.35853300 | -1.18822600 |
| C  | 0.17973000  | -4.03913400 | 0.52506200  |
| C  | 1.46613700  | -2.97176400 | -1.70356100 |
| H  | -0.06493600 | -1.46361000 | -1.65807200 |
| C  | 1.32053800  | -4.66187700 | 0.01153400  |
| H  | -0.32174400 | -4.45952400 | 1.39299100  |
| C  | 1.96634400  | -4.13233100 | -1.10712500 |
| H  | 1.96618700  | -2.54095000 | -2.56596500 |
| H  | 1.70000200  | -5.56416300 | 0.48288000  |
| H  | 2.84911900  | -4.61932000 | -1.51106000 |
| C  | 0.39190700  | 1.25552200  | -1.74578200 |
| C  | 1.62205400  | 1.70142600  | -1.25829200 |
| C  | 1.70054800  | 2.68229200  | -0.27078800 |
| C  | 0.51302400  | 3.20510000  | 0.24808500  |
| C  | -0.72280300 | 2.74226200  | -0.20162800 |
| C  | -0.78615400 | 1.77303200  | -1.20414000 |
| H  | 0.35161500  | 0.51216000  | -2.53278100 |
| H  | 2.66289300  | 3.02906300  | 0.08778900  |
| H  | 0.56075800  | 3.97643900  | 1.01142400  |
| H  | -1.64009200 | 3.12238400  | 0.23170800  |
| H  | -1.75121700 | 1.39306200  | -1.52865700 |
| C  | 2.03607100  | 2.29880100  | 3.25349300  |
| H  | 1.00332500  | 2.13463300  | 2.94972700  |

|   |            |             |             |
|---|------------|-------------|-------------|
| H | 2.10704300 | 2.26870700  | 4.34431500  |
| H | 2.36305900 | 3.27800400  | 2.89563300  |
| C | 3.40396300 | -1.83184600 | 0.96872300  |
| H | 4.10766300 | -2.53893600 | 1.41322200  |
| H | 2.39549100 | -2.23491900 | 1.03742600  |
| H | 3.64697900 | -1.67182100 | -0.08270600 |

## TS12

|   |             |             |             |
|---|-------------|-------------|-------------|
| P | -1.17469800 | -0.76113400 | -1.86735200 |
| C | -1.14798800 | 0.45508300  | -3.28129200 |
| H | -0.16058100 | 0.91800900  | -3.33644400 |
| H | -1.30452100 | -0.10869400 | -4.20576100 |
| C | -2.22646500 | 1.54337800  | -3.15329800 |
| H | -2.29175200 | 2.05808300  | -4.11925700 |
| H | -3.20647900 | 1.08403100  | -2.98729700 |
| C | -1.94797700 | 2.60337400  | -2.08101800 |
| H | -2.58482700 | 3.47964800  | -2.23808700 |
| H | -0.91904300 | 2.96659700  | -2.17036700 |
| P | -2.11689800 | 2.08513500  | -0.29940600 |
| C | -0.14221700 | -2.13980000 | -2.50063300 |
| C | -0.45761000 | -3.44892700 | -2.09444400 |
| C | 0.90627000  | -1.94223000 | -3.40895400 |
| C | 0.22830800  | -4.53412600 | -2.63376000 |
| H | -1.25027100 | -3.60858300 | -1.37048100 |
| C | 1.60801000  | -3.03336300 | -3.92782800 |
| H | 1.16826800  | -0.94175400 | -3.73573300 |
| C | 1.25773000  | -4.33153700 | -3.55722300 |
| H | -0.04154800 | -5.54105500 | -2.32940300 |
| H | 2.41288700  | -2.86528000 | -4.63720400 |
| H | 1.78738800  | -5.18026500 | -3.97970800 |
| C | -2.86265900 | -1.43370500 | -2.16732100 |
| C | -3.16857300 | -2.07727700 | -3.37721600 |
| C | -3.88427500 | -1.19792800 | -1.24589300 |
| C | -4.47751900 | -2.46280100 | -3.65717100 |
| H | -2.38265600 | -2.28553300 | -4.09693100 |
| C | -5.19843600 | -1.57055000 | -1.53097100 |
| H | -3.64164900 | -0.74429700 | -0.29886300 |
| C | -5.49740200 | -2.20245700 | -2.73643800 |
| H | -4.70343100 | -2.96486100 | -4.59343500 |
| H | -5.97754300 | -1.36624800 | -0.80346300 |
| H | -6.51817000 | -2.49899200 | -2.95975500 |
| C | -1.59427500 | 3.67519100  | 0.46296200  |
| C | -0.22336100 | 3.87120900  | 0.68503800  |
| C | -2.49364200 | 4.69977100  | 0.77902800  |
| C | 0.24267900  | 5.08048400  | 1.19372700  |
| H | 0.47811300  | 3.07176400  | 0.48361200  |
| C | -2.02549300 | 5.90449600  | 1.30724100  |

|    |             |             |             |
|----|-------------|-------------|-------------|
| H  | -3.55808800 | 4.55467400  | 0.62579100  |
| C  | -0.65875000 | 6.09912900  | 1.51073000  |
| H  | 1.30860600  | 5.21342000  | 1.35132900  |
| H  | -2.73123900 | 6.69047700  | 1.56024300  |
| H  | -0.29862100 | 7.03787500  | 1.92129400  |
| C  | -3.93074200 | 1.99058200  | -0.02171700 |
| C  | -4.87621500 | 2.64846500  | -0.82037300 |
| C  | -4.38100900 | 1.16067800  | 1.01867900  |
| C  | -6.24173700 | 2.48650900  | -0.58130000 |
| H  | -4.55698600 | 3.28564500  | -1.63818600 |
| C  | -5.74437700 | 1.00896200  | 1.26336100  |
| H  | -3.66072400 | 0.60234300  | 1.60926800  |
| C  | -6.67827100 | 1.67021700  | 0.46255000  |
| H  | -6.96311500 | 2.99634400  | -1.21303400 |
| H  | -6.07370800 | 0.35890200  | 2.06808800  |
| H  | -7.74112200 | 1.54306900  | 0.64543700  |
| Pd | -0.75924300 | 0.20125400  | 0.30793700  |
| C  | 0.50095700  | 0.31746500  | 3.05326300  |
| C  | -0.53805600 | 0.83413300  | 2.26704900  |
| C  | -1.44762700 | 1.68112000  | 2.91741700  |
| C  | -1.31938800 | 2.00476800  | 4.27146300  |
| C  | -0.26844000 | 1.48934400  | 5.02665300  |
| C  | 0.64219300  | 0.63551700  | 4.40568200  |
| H  | 1.21659800  | -0.36334600 | 2.61162700  |
| H  | -2.04798700 | 2.66952500  | 4.72912600  |
| H  | -0.16228900 | 1.74539400  | 6.07693900  |
| H  | 1.46842600  | 0.21292900  | 4.97367400  |
| I  | -1.95919100 | -2.39271000 | 1.55280500  |
| H  | -2.28207600 | 2.12023700  | 2.38839500  |
| Cu | 0.62713100  | -1.85282200 | 0.80866000  |
| B  | 2.92937500  | 2.16400300  | -1.42124800 |
| C  | 1.60197200  | 0.56445800  | 0.04207800  |
| C  | 1.38256200  | -2.86489000 | 3.89743400  |
| O  | 3.30191900  | 3.04446700  | -0.43233600 |
| O  | 3.82300200  | 2.11774100  | -2.46234000 |
| C  | 1.90123000  | -3.21217100 | 1.48256600  |
| N  | 2.10106700  | -3.49853400 | 2.79986400  |
| N  | 2.77535500  | -4.03215100 | 0.83989600  |
| C  | 3.08901000  | -4.45541700 | 2.97195200  |
| C  | 3.51381000  | -4.79725700 | 1.72927600  |
| C  | 4.68504700  | 3.40968700  | -0.68738300 |
| C  | 4.81210000  | 3.15932600  | -2.23424100 |
| C  | 2.84903100  | -4.17688700 | -0.60247100 |
| H  | 3.39394300  | -4.80176800 | 3.94649100  |
| H  | 4.25507700  | -5.50900300 | 1.40314400  |
| H  | 2.29414000  | -3.36211700 | -1.05738900 |
| H  | 2.40765200  | -5.12775200 | -0.90950000 |
| H  | 3.88859600  | -4.12669800 | -0.92995300 |



|   |            |             |             |
|---|------------|-------------|-------------|
| H | 1.95802600 | -2.02792500 | 4.30009300  |
| H | 1.21117300 | -3.60075500 | 4.68627200  |
| H | 0.42225600 | -2.50368000 | 3.52957900  |
| C | 2.84374400 | -0.22722900 | 0.25780600  |
| C | 3.49966500 | -0.90074600 | -0.79602800 |
| C | 4.72649700 | -1.53272900 | -0.60620200 |
| C | 5.34071100 | -1.54281800 | 0.64743800  |
| C | 3.51543100 | -0.20043000 | 1.50326100  |
| C | 4.71997200 | -0.86547600 | 1.70165200  |
| H | 3.04283800 | -0.92778700 | -1.77842300 |
| H | 5.20011900 | -0.82157100 | 2.67580600  |
| H | 1.53794800 | 1.29496400  | 0.84273300  |
| H | 5.20716700 | -2.02206800 | -1.44988700 |
| H | 6.29473000 | -2.04010200 | 0.79341300  |
| H | 3.08901400 | 0.37995300  | 2.31306400  |
| C | 5.55074900 | 2.46113100  | 0.14718500  |
| H | 6.61175400 | 2.71725600  | 0.07142200  |
| H | 5.24778800 | 2.53792800  | 1.19396700  |
| H | 5.41285900 | 1.42188300  | -0.15872400 |
| C | 4.89448900 | 4.85306000  | -0.24736300 |
| H | 4.76665600 | 4.92586500  | 0.83623700  |
| H | 5.90620100 | 5.19180200  | -0.49321400 |
| H | 4.17567300 | 5.52443500  | -0.71997500 |
| C | 6.17031500 | 2.64090000  | -2.69060500 |
| H | 6.15989500 | 2.48306800  | -3.77274700 |
| H | 6.95958200 | 3.36364200  | -2.45936400 |
| H | 6.41056400 | 1.69142100  | -2.21051200 |
| C | 4.38420300 | 4.36397900  | -3.07675700 |
| H | 5.11397700 | 5.17667900  | -3.01921800 |
| H | 4.29421700 | 4.05221700  | -4.12065000 |
| H | 3.41283400 | 4.74460500  | -2.74934300 |
| C | 1.62835000 | 1.29120800  | -1.31438600 |
| H | 1.58389200 | 0.59488100  | -2.15447200 |
| H | 0.75264600 | 1.93818600  | -1.40770000 |

### TS13

|   |             |             |             |
|---|-------------|-------------|-------------|
| P | 0.18080800  | 1.51212700  | -1.47425200 |
| C | 1.35347900  | 1.75654700  | -2.90549600 |
| H | 1.24642400  | 0.88853200  | -3.56466500 |
| H | 1.04511200  | 2.63805100  | -3.47691700 |
| C | 2.82318000  | 1.91580000  | -2.47161500 |
| H | 3.37177600  | 2.33755200  | -3.32269100 |
| H | 2.88547900  | 2.66459200  | -1.67479100 |
| C | 3.56160000  | 0.63343500  | -2.04890400 |
| H | 4.63917800  | 0.82728300  | -1.99580900 |
| H | 3.42989400  | -0.14250500 | -2.81217900 |
| P | 3.00938700  | -0.17422600 | -0.46249900 |
| C | -1.46891400 | 1.71936400  | -2.24635200 |

|    |             |             |             |
|----|-------------|-------------|-------------|
| C  | -2.44788800 | 2.56026000  | -1.69471500 |
| C  | -1.83537500 | 0.86126300  | -3.29727300 |
| C  | -3.75716400 | 2.53576100  | -2.17581400 |
| H  | -2.18584500 | 3.22598500  | -0.87966000 |
| C  | -3.13935900 | 0.85122800  | -3.78703800 |
| H  | -1.10134500 | 0.18013800  | -3.71979800 |
| C  | -4.10823600 | 1.68282100  | -3.22133700 |
| H  | -4.50512200 | 3.18307200  | -1.72701500 |
| H  | -3.40372200 | 0.18160800  | -4.60024900 |
| H  | -5.12942600 | 1.65943300  | -3.58894300 |
| C  | 0.43139300  | 3.07443600  | -0.54441700 |
| C  | 0.37516500  | 4.33788700  | -1.15443100 |
| C  | 0.74492700  | 2.98915800  | 0.81648600  |
| C  | 0.64089000  | 5.48962300  | -0.41654500 |
| H  | 0.11518300  | 4.42159900  | -2.20578800 |
| C  | 1.01401400  | 4.14149900  | 1.55542900  |
| H  | 0.77775200  | 2.01877100  | 1.29363700  |
| C  | 0.96586000  | 5.39126300  | 0.94014100  |
| H  | 0.59615300  | 6.46292200  | -0.89671000 |
| H  | 1.26629600  | 4.05274900  | 2.60676300  |
| H  | 1.17836400  | 6.28970600  | 1.51251900  |
| C  | 4.24257800  | -1.52942900 | -0.35218000 |
| C  | 3.89667000  | -2.76290500 | -0.92177800 |
| C  | 5.49445700  | -1.38350700 | 0.26282100  |
| C  | 4.79731300  | -3.82689100 | -0.89446300 |
| H  | 2.91493900  | -2.89719200 | -1.36275600 |
| C  | 6.39010900  | -2.45195300 | 0.29422900  |
| H  | 5.76499500  | -0.43741400 | 0.72102000  |
| C  | 6.04421400  | -3.67427400 | -0.28701600 |
| H  | 4.50831000  | -4.77979900 | -1.32665800 |
| H  | 7.35726900  | -2.33142400 | 0.77421900  |
| H  | 6.74146600  | -4.50665500 | -0.25658900 |
| C  | 3.53689400  | 0.99049100  | 0.85585100  |
| C  | 4.40692600  | 2.07031700  | 0.65859700  |
| C  | 2.97257900  | 0.80225500  | 2.12836600  |
| C  | 4.69916200  | 2.94669000  | 1.70589500  |
| H  | 4.85795000  | 2.23957800  | -0.31330200 |
| C  | 3.27685500  | 1.66528900  | 3.17742800  |
| H  | 2.26126000  | -0.00494800 | 2.27648600  |
| C  | 4.13766000  | 2.74585700  | 2.96651900  |
| H  | 5.36499300  | 3.78741900  | 1.53446600  |
| H  | 2.82577800  | 1.50700800  | 4.15256800  |
| H  | 4.36387200  | 3.43055000  | 3.77856100  |
| Pd | 0.69284500  | -0.54840100 | -0.38161500 |
| C  | 0.24244900  | -3.31905000 | -1.27984600 |
| C  | 0.43099000  | -2.64031000 | -0.05933000 |
| C  | 1.12468100  | -3.32271200 | 0.96342500  |
| C  | 1.62314900  | -4.60570700 | 0.76531400  |

|   |             |             |             |
|---|-------------|-------------|-------------|
| C | 1.44422900  | -5.25990300 | -0.46059900 |
| C | 0.75951800  | -4.60341400 | -1.48267600 |
| H | -0.30279900 | -2.83320600 | -2.08337300 |
| H | 2.17104700  | -5.09568000 | 1.56607100  |
| H | 1.83131900  | -6.26321500 | -0.61054300 |
| H | 0.61296900  | -5.09286100 | -2.44263700 |
| H | 1.29839900  | -2.82981100 | 1.91521800  |
| B | -3.77818600 | -1.50050600 | 0.01195600  |
| C | -1.28056900 | -1.67811700 | 0.52661200  |
| O | -4.28938000 | -2.23189500 | 1.05523100  |
| O | -4.64001200 | -0.53047400 | -0.43763700 |
| C | -5.49105200 | -1.55480800 | 1.51531700  |
| C | -5.90276300 | -0.70260500 | 0.25507800  |
| C | -1.27414200 | -0.49992500 | 1.45822500  |
| C | -1.98978500 | 0.68610900  | 1.19123200  |
| C | -2.00301900 | 1.73821500  | 2.10183800  |
| C | -1.29384100 | 1.65237800  | 3.30339900  |
| C | -0.58786300 | -0.58102800 | 2.68714600  |
| C | -0.58472200 | 0.48391500  | 3.58721600  |
| H | -2.53793200 | 0.78721400  | 0.26390700  |
| H | -0.04036500 | 0.39130000  | 4.52331100  |
| H | -1.38938800 | -2.57122300 | 1.13604800  |
| H | -2.56136800 | 2.63915700  | 1.86339000  |
| H | -1.29842800 | 2.47982500  | 4.00602500  |
| H | -0.06277300 | -1.49724400 | 2.93640100  |
| C | -5.07871300 | -0.70385400 | 2.72005700  |
| H | -5.94079500 | -0.20463600 | 3.17219100  |
| H | -4.62444300 | -1.35664200 | 3.46983900  |
| H | -4.33630500 | 0.04744200  | 2.44316300  |
| C | -6.50808700 | -2.60895100 | 1.93838900  |
| H | -6.12223900 | -3.16288800 | 2.79829700  |
| H | -7.45300200 | -2.14018700 | 2.23187300  |
| H | -6.70570000 | -3.32300500 | 1.13745700  |
| C | -6.46367600 | 0.67989600  | 0.56849400  |
| H | -6.68732900 | 1.20258900  | -0.36571300 |
| H | -7.38862900 | 0.60438500  | 1.14906400  |
| H | -5.74503000 | 1.28015600  | 1.12809400  |
| C | -6.82922200 | -1.44910400 | -0.70858100 |
| H | -7.83522300 | -1.56699200 | -0.29575000 |
| H | -6.89906400 | -0.88029900 | -1.63948500 |
| H | -6.43097200 | -2.43911500 | -0.94608300 |
| C | -2.33635500 | -1.69588500 | -0.57587600 |
| H | -2.15665300 | -0.93238500 | -1.33521900 |
| H | -2.28117000 | -2.66444500 | -1.08559100 |

## 12

|    |            |             |             |
|----|------------|-------------|-------------|
| Cu | 1.61162500 | -1.74622700 | 0.64677500  |
| B  | 0.13329800 | 2.74293500  | -0.98239800 |

|   |             |             |             |
|---|-------------|-------------|-------------|
| C | -2.12232800 | 1.52889400  | -0.96072700 |
| C | 2.07418500  | -2.26241900 | -2.73533400 |
| O | 1.35425700  | 2.92936900  | -1.57113500 |
| O | 0.13559200  | 2.96874900  | 0.36879700  |
| C | 3.09791200  | -1.53708000 | -0.58084400 |
| N | 3.16532600  | -1.73710600 | -1.92205000 |
| N | 4.31132400  | -1.00353000 | -0.26229300 |
| C | 4.38412300  | -1.32395500 | -2.43443800 |
| C | 5.11249200  | -0.86204900 | -1.38487300 |
| C | 2.25794600  | 3.43560900  | -0.55179500 |
| C | 1.52595900  | 3.04465900  | 0.78838000  |
| C | 4.72173300  | -0.65307100 | 1.09022800  |
| H | 3.87830000  | -0.82735400 | 1.75844500  |
| H | 5.00608700  | 0.40113000  | 1.13476100  |
| H | 5.56611800  | -1.27293400 | 1.40361400  |
| H | 1.34085200  | -2.72281100 | -2.07757800 |
| H | 2.47054000  | -3.00272400 | -3.43453400 |
| H | 1.58176500  | -1.44887400 | -3.26911600 |
| C | -3.29740300 | 2.18657900  | -0.34760400 |
| C | -4.53922300 | 1.53301100  | -0.28298200 |
| C | -5.63687300 | 2.15260900  | 0.30962000  |
| C | -5.51141700 | 3.43230000  | 0.85310300  |
| C | -3.18482600 | 3.47877100  | 0.19251800  |
| C | -4.28117700 | 4.08983600  | 0.79609200  |
| H | -4.64477000 | 0.54635500  | -0.72322300 |
| H | -4.17359700 | 5.08058000  | 1.22755600  |
| H | -6.59250500 | 1.63795700  | 0.34206300  |
| H | -6.36691900 | 3.91432000  | 1.31660800  |
| H | -2.22267400 | 3.97859300  | 0.18197800  |
| C | 2.36331300  | 4.94698400  | -0.76921000 |
| H | 3.07614800  | 5.40611900  | -0.07833900 |
| H | 2.70028100  | 5.13556300  | -1.79187600 |
| H | 1.39174100  | 5.43091800  | -0.63828600 |
| C | 3.61558200  | 2.76978500  | -0.75268200 |
| H | 4.04281700  | 3.08716900  | -1.70793800 |
| H | 4.31061500  | 3.05677200  | 0.04371000  |
| H | 3.51924200  | 1.68369500  | -0.76914000 |
| C | 1.63753200  | 4.06923900  | 1.91059500  |
| H | 1.08051800  | 3.71449200  | 2.78153200  |
| H | 2.68252400  | 4.20528600  | 2.20738500  |
| H | 1.22883400  | 5.03727300  | 1.61609100  |
| C | 1.89664500  | 1.65264900  | 1.29857300  |
| H | 2.90757900  | 1.63789600  | 1.71555500  |
| H | 1.19493700  | 1.35118600  | 2.07869100  |
| H | 1.82914500  | 0.91243300  | 0.49849900  |
| C | -1.18127500 | 2.38069000  | -1.77492200 |
| H | -0.86430900 | 1.85028900  | -2.67639600 |
| H | -1.69371500 | 3.29583300  | -2.09080700 |

|   |             |             |             |
|---|-------------|-------------|-------------|
| C | -1.93974000 | 0.20174900  | -0.75819000 |
| O | -0.89548300 | -1.89573600 | -1.37434200 |
| H | -2.64439200 | -0.35327900 | -0.15308900 |
| H | 6.11115600  | -0.45847400 | -1.33765800 |
| H | 4.62227400  | -1.39465500 | -3.48365200 |
| C | -0.78289600 | -0.52756700 | -1.26523800 |
| O | 0.29136500  | -0.03818900 | -1.57584000 |
| C | -3.09777400 | -2.30799900 | -2.27124500 |
| C | -4.32332800 | -2.96734000 | -2.17620300 |
| C | -4.57646000 | -3.82861000 | -1.10599100 |
| C | -3.60034800 | -4.02941500 | -0.12789200 |
| C | -2.37208300 | -3.37141900 | -0.20648300 |
| C | -2.14089400 | -2.51550000 | -1.27842700 |
| H | -2.87948300 | -1.63893300 | -3.09687100 |
| H | -5.07716900 | -2.81063200 | -2.94174600 |
| H | -5.53094200 | -4.34085900 | -1.03570500 |
| H | -3.79482600 | -4.69326800 | 0.70869100  |
| H | -1.60863900 | -3.47928000 | 0.55573100  |
| I | 0.00245600  | -1.82687900 | 2.51994200  |

#### TS14

|   |             |             |             |
|---|-------------|-------------|-------------|
| P | -0.88520700 | -0.73630800 | -2.39523600 |
| C | -0.71353300 | 0.44465500  | -3.83744700 |
| H | 0.28246900  | 0.89621200  | -3.76742900 |
| H | -0.73419900 | -0.13866500 | -4.76285200 |
| C | -1.78653300 | 1.54291600  | -3.90674000 |
| H | -1.72330500 | 1.99962300  | -4.90176700 |
| H | -2.77888200 | 1.08977200  | -3.84157800 |
| C | -1.65777800 | 2.67947400  | -2.88467600 |
| H | -2.35247400 | 3.48851000  | -3.13432000 |
| H | -0.64832300 | 3.09954700  | -2.94489600 |
| P | -1.88933400 | 2.22934900  | -1.10312800 |
| C | -0.06899100 | -2.23784200 | -3.09145400 |
| C | -0.65578000 | -3.49850300 | -2.89654600 |
| C | 1.12236100  | -2.15576600 | -3.82755700 |
| C | -0.07465500 | -4.64279600 | -3.44079700 |
| H | -1.57773400 | -3.58150100 | -2.33208700 |
| C | 1.71066900  | -3.30436000 | -4.35794100 |
| H | 1.59710400  | -1.19569500 | -3.99497500 |
| C | 1.11071500  | -4.55087100 | -4.17231000 |
| H | -0.55092500 | -5.60716700 | -3.29082900 |
| H | 2.63229000  | -3.22116000 | -4.92626900 |
| H | 1.56265100  | -5.44239100 | -4.59657000 |
| C | -2.63786700 | -1.25539200 | -2.52645600 |
| C | -3.24862000 | -1.48000900 | -3.77254800 |
| C | -3.35746900 | -1.50162200 | -1.35594800 |
| C | -4.56853600 | -1.91688000 | -3.83472700 |
| H | -2.69318100 | -1.32620200 | -4.69277700 |

|    |             |             |             |
|----|-------------|-------------|-------------|
| C  | -4.67585400 | -1.95825800 | -1.41884800 |
| H  | -2.89085400 | -1.33940900 | -0.39529200 |
| C  | -5.28404100 | -2.15626200 | -2.65591900 |
| H  | -5.03801400 | -2.07977700 | -4.80066300 |
| H  | -5.20192400 | -2.14224300 | -0.48904600 |
| H  | -6.31262500 | -2.50127800 | -2.70897400 |
| C  | -1.83530400 | 3.87517900  | -0.28101500 |
| C  | -1.06031400 | 4.92648000  | -0.78998900 |
| C  | -2.48393100 | 4.05085300  | 0.95061700  |
| C  | -0.92957900 | 6.12035900  | -0.08217100 |
| H  | -0.52998300 | 4.81980800  | -1.72870900 |
| C  | -2.35111500 | 5.24412500  | 1.65570800  |
| H  | -3.08317300 | 3.25144600  | 1.36821500  |
| C  | -1.56984400 | 6.28146000  | 1.14530400  |
| H  | -0.31322200 | 6.91723900  | -0.48654600 |
| H  | -2.85535200 | 5.35811800  | 2.61043100  |
| H  | -1.45809800 | 7.20703400  | 1.70173500  |
| C  | -3.63088300 | 1.74209100  | -0.88543000 |
| C  | -4.63241400 | 1.99876800  | -1.83000400 |
| C  | -3.95918500 | 1.11068300  | 0.32285900  |
| C  | -5.94898600 | 1.62412900  | -1.56472700 |
| H  | -4.39586200 | 2.48780800  | -2.76925500 |
| C  | -5.28072600 | 0.76489600  | 0.59569400  |
| H  | -3.17851700 | 0.86459500  | 1.03306900  |
| C  | -6.27472200 | 1.01645100  | -0.35023800 |
| H  | -6.72071200 | 1.80985900  | -2.30595500 |
| H  | -5.50601100 | 0.25292700  | 1.52325800  |
| H  | -7.30162800 | 0.72594700  | -0.14921000 |
| Pd | -0.23722300 | 0.62391800  | -0.39995800 |
| C  | 1.03027700  | 3.81146100  | 2.32254900  |
| C  | 0.88955300  | 3.01957100  | 1.17501400  |
| C  | 1.59249300  | 3.36286300  | 0.01576600  |
| C  | 2.43737700  | 4.46994400  | 0.00251000  |
| C  | 2.57738200  | 5.25103500  | 1.15096100  |
| C  | 1.86843300  | 4.92222000  | 2.31063100  |
| H  | 0.46419400  | 3.53726500  | 3.20619600  |
| H  | 2.98591400  | 4.71649700  | -0.90099200 |
| H  | 3.23599100  | 6.11500700  | 1.14416900  |
| H  | 1.97097400  | 5.53470100  | 3.20165600  |
| H  | 1.47154600  | 2.75778900  | -0.87611500 |
| Cu | 0.04436200  | -1.74175800 | 0.86170600  |
| B  | 3.97529400  | 0.33986600  | -1.39149000 |
| C  | 1.90559500  | 0.05448200  | -0.01194200 |
| C  | 0.49570200  | -3.23964100 | 3.83192300  |
| O  | 4.16758400  | 1.70232600  | -1.29958900 |
| O  | 5.15013500  | -0.36544100 | -1.33286200 |
| C  | 0.98386300  | -3.39696600 | 1.38277200  |
| N  | 1.10237000  | -3.85517000 | 2.65841600  |

|   |             |             |             |
|---|-------------|-------------|-------------|
| N | 1.72034100  | -4.28064200 | 0.65238700  |
| C | 1.89303800  | -4.99010600 | 2.72207000  |
| C | 2.28818800  | -5.26005600 | 1.45267800  |
| C | 5.50124600  | 1.89518200  | -0.75602300 |
| C | 6.24100800  | 0.59342700  | -1.23665700 |
| C | 1.99449400  | -4.14672500 | -0.76556100 |
| H | 1.42131900  | -3.30595300 | -1.14689000 |
| H | 1.69734100  | -5.04865100 | -1.30244300 |
| H | 3.05926500  | -3.95901000 | -0.92962500 |
| H | -0.35979900 | -3.82425500 | 4.16987000  |
| H | 0.15008200  | -2.24677300 | 3.56372200  |
| H | 1.25059900  | -3.15483000 | 4.61622100  |
| C | 2.51795900  | -0.65234600 | 1.16269700  |
| C | 3.52228700  | -1.63069500 | 1.02433800  |
| C | 4.15152900  | -2.19439100 | 2.13386700  |
| C | 3.80728500  | -1.79679700 | 3.42510200  |
| C | 2.18415200  | -0.26524200 | 2.47944900  |
| C | 2.81939700  | -0.82169200 | 3.58522500  |
| H | 3.83457600  | -1.94664600 | 0.03872400  |
| H | 2.53216300  | -0.49500000 | 4.58103200  |
| H | 2.11964000  | 1.10144600  | 0.17696300  |
| H | 4.91730400  | -2.95034000 | 1.98222700  |
| H | 4.29955700  | -2.23362800 | 4.28894100  |
| H | 1.40269500  | 0.46579700  | 2.63873800  |
| C | 5.34092300  | 1.97334700  | 0.76668400  |
| H | 6.29415600  | 2.18294100  | 1.26040000  |
| H | 4.63973200  | 2.77728200  | 1.00311100  |
| H | 4.93305900  | 1.04306200  | 1.17054400  |
| C | 6.06966100  | 3.19997000  | -1.29846700 |
| H | 5.47715300  | 4.03779700  | -0.92137700 |
| H | 7.10330700  | 3.33947200  | -0.96594100 |
| H | 6.04589200  | 3.22711100  | -2.38919100 |
| C | 7.26873400  | 0.04456200  | -0.25444900 |
| H | 7.73089100  | -0.85601000 | -0.66852500 |
| H | 8.05935400  | 0.77886800  | -0.06933200 |
| H | 6.80126000  | -0.21960100 | 0.69515200  |
| C | 6.84228600  | 0.72224000  | -2.63769200 |
| H | 7.72115400  | 1.37341500  | -2.64077900 |
| H | 7.14513500  | -0.26864000 | -2.98610900 |
| H | 6.10868000  | 1.12251700  | -3.34268300 |
| C | 2.52884400  | -0.26843100 | -1.38862400 |
| H | 2.49810000  | -1.33384300 | -1.62067800 |
| H | 1.94054000  | 0.24127700  | -2.15907900 |
| C | -0.03225700 | 1.83014400  | 1.22550000  |
| O | -0.70997000 | 1.61393700  | 2.21184200  |
| S | -2.81011000 | -1.93888800 | 2.30185000  |
| O | -4.20765400 | -1.89465800 | 1.84117900  |
| O | -2.29791400 | -3.23090800 | 2.77968100  |

|   |             |             |            |
|---|-------------|-------------|------------|
| C | -2.77565600 | -0.82301700 | 3.78508700 |
| F | -3.48341000 | -1.35740600 | 4.78955800 |
| F | -3.30288800 | 0.37459300  | 3.48591400 |
| F | -1.51340100 | -0.63870500 | 4.20966800 |
| O | -1.86878800 | -1.19419500 | 1.38191900 |
| H | 2.91329800  | -6.04276500 | 1.05366400 |
| H | 2.10047400  | -5.49515900 | 3.65176600 |

**COM<sub>R3</sub>-Pd(dppp)**

|    |             |             |             |
|----|-------------|-------------|-------------|
| O  | 4.25864600  | -1.05614300 | -1.29435800 |
| C  | 5.43255400  | -1.00033500 | -0.44433500 |
| C  | 5.80314100  | 0.52921700  | -0.48019600 |
| O  | 4.52809000  | 1.15557200  | -0.76767600 |
| B  | 3.69625000  | 0.20038500  | -1.30988700 |
| C  | 6.49412000  | -1.93191200 | -1.01931600 |
| H  | 6.13923400  | -2.96490200 | -0.96772000 |
| H  | 6.70984700  | -1.70016900 | -2.06357000 |
| H  | 7.42354500  | -1.86269800 | -0.44445500 |
| C  | 5.00084500  | -1.48390500 | 0.94376500  |
| H  | 4.56124700  | -2.47955200 | 0.84694200  |
| H  | 4.24297100  | -0.82955000 | 1.37705200  |
| C  | 6.32656600  | 1.09133800  | 0.83741700  |
| H  | 6.54798300  | 2.15618600  | 0.72093700  |
| C  | 6.74549800  | 0.89762500  | -1.63005500 |
| H  | 6.79297800  | 1.98673700  | -1.71282300 |
| H  | 7.75763000  | 0.51770100  | -1.46232400 |
| H  | 6.37658200  | 0.50117700  | -2.57975300 |
| C  | 1.20181300  | -0.30354000 | -0.92953600 |
| C  | 2.23195000  | 0.50095800  | -1.78679000 |
| H  | 2.05734200  | 1.58313800  | -1.74513900 |
| H  | 2.09223200  | 0.21804600  | -2.83719700 |
| H  | 1.16237500  | -1.33338600 | -1.29685200 |
| I  | -3.71706100 | -2.27087800 | -0.60930300 |
| C  | -2.07447200 | 1.80349600  | -0.90479000 |
| C  | -3.36944500 | 3.50616200  | -0.14131200 |
| C  | -4.05246300 | 2.89480900  | -1.14369200 |
| H  | -3.63036900 | 4.34573500  | 0.48283700  |
| H  | -5.02595200 | 3.09486800  | -1.56213000 |
| N  | -3.24306800 | 1.86401800  | -1.59746400 |
| N  | -2.16784000 | 2.82835000  | -0.01334600 |
| Cu | -0.55458600 | 0.59299900  | -1.01343200 |
| H  | 5.58629100  | 0.98285500  | 1.63134200  |
| H  | 7.24784600  | 0.58288200  | 1.13989300  |
| H  | 5.85231700  | -1.54470800 | 1.62857900  |
| C  | -3.59037300 | 0.96540600  | -2.68885300 |
| H  | -3.73771700 | 1.53313800  | -3.61196000 |
| H  | -2.76982700 | 0.26118400  | -2.81846900 |



|   |             |             |             |
|---|-------------|-------------|-------------|
| H | -4.49802300 | 0.40757000  | -2.44838600 |
| C | -1.10530800 | 3.20073700  | 0.91218700  |
| H | -1.53700500 | 3.44581800  | 1.88387500  |
| H | -0.42848200 | 2.35486900  | 1.03104400  |
| H | -0.54948000 | 4.06101100  | 0.52796200  |
| C | 1.49482700  | -0.32478800 | 0.52537500  |
| C | 1.34138100  | -1.50267000 | 1.29128700  |
| C | 1.93294000  | 0.82506200  | 1.22549100  |
| C | 1.58086400  | -1.52863700 | 2.66225300  |
| H | 1.04563700  | -2.41608100 | 0.78009900  |
| C | 2.17991600  | 0.79905200  | 2.59742000  |
| H | 2.10696500  | 1.74301400  | 0.67258900  |
| C | 2.00044100  | -0.37511600 | 3.33484500  |
| H | 1.45532900  | -2.45937400 | 3.20987800  |
| H | 2.52432500  | 1.70320900  | 3.09397800  |
| H | 2.19830000  | -0.39653700 | 4.40202100  |
| C | -1.64570700 | 0.02997200  | 2.46852500  |
| C | -1.96093800 | -0.88570000 | 1.46226100  |
| C | -3.23617500 | -0.86055400 | 0.89781400  |
| C | -4.19211900 | 0.07234700  | 1.29894900  |
| C | -3.86196900 | 0.98350800  | 2.30465700  |
| C | -2.59731200 | 0.95717200  | 2.89504600  |
| H | -0.65164700 | 0.00651800  | 2.90282300  |
| H | -1.21621600 | -1.59924700 | 1.13641200  |
| H | -5.17573700 | 0.08834500  | 0.84381700  |
| H | -4.60263500 | 1.70999600  | 2.62577800  |
| H | -2.35290900 | 1.65960900  | 3.68642300  |

### TS5<sub>c</sub>

|    |             |             |             |
|----|-------------|-------------|-------------|
| P  | 1.42249900  | 0.47740600  | 1.06019200  |
| C  | 0.70721500  | 0.98237600  | 2.70149600  |
| H  | 0.60123400  | 0.05049900  | 3.26796200  |
| H  | 1.43691400  | 1.59165500  | 3.24608900  |
| C  | -0.64605700 | 1.71660400  | 2.62984500  |
| H  | -0.79263500 | 2.22447800  | 3.59059800  |
| H  | -0.60702900 | 2.51315600  | 1.87793600  |
| C  | -1.88445000 | 0.83491800  | 2.38655400  |
| H  | -2.77677200 | 1.39899400  | 2.67822000  |
| H  | -1.84254200 | -0.06195900 | 3.01535600  |
| P  | -2.08962900 | 0.25150700  | 0.62532100  |
| Pd | -0.12791700 | -0.75472100 | -0.20969600 |
| C  | 3.00905600  | -0.28307900 | 1.58035500  |
| C  | 4.22338200  | 0.41224700  | 1.64012300  |
| C  | 2.98601900  | -1.65023800 | 1.90004100  |
| C  | 5.39235500  | -0.24615600 | 2.02485700  |
| H  | 4.25478900  | 1.46537700  | 1.37991600  |
| C  | 4.15209800  | -2.30263400 | 2.29683400  |

|   |             |             |             |
|---|-------------|-------------|-------------|
| H | 2.05339600  | -2.20228300 | 1.80882000  |
| C | 5.35886600  | -1.60135500 | 2.35729200  |
| H | 6.33043100  | 0.30014700  | 2.06397900  |
| H | 4.12247300  | -3.36009400 | 2.54240800  |
| H | 6.27041300  | -2.11165200 | 2.65386500  |
| C | 1.91966200  | 2.06691700  | 0.28736200  |
| C | 2.04052800  | 3.27935000  | 0.98025400  |
| C | 2.11178800  | 2.06127400  | -1.10443700 |
| C | 2.33881100  | 4.46039200  | 0.29784700  |
| H | 1.89612900  | 3.31338600  | 2.05477000  |
| C | 2.42294600  | 3.23777600  | -1.78251800 |
| H | 1.99822200  | 1.13631800  | -1.65798700 |
| C | 2.53065800  | 4.44297900  | -1.08405300 |
| H | 2.41907000  | 5.39393400  | 0.84710500  |
| H | 2.56908900  | 3.21173000  | -2.85829600 |
| H | 2.75904800  | 5.36322300  | -1.61353600 |
| C | -3.64755700 | -0.71706200 | 0.69675000  |
| C | -4.70536100 | -0.45606900 | 1.58110900  |
| C | -3.75606100 | -1.79868400 | -0.19003100 |
| C | -5.85415100 | -1.24704000 | 1.56370400  |
| H | -4.63853500 | 0.36341900  | 2.28952100  |
| C | -4.90767400 | -2.58488600 | -0.21163600 |
| H | -2.91870300 | -2.02866000 | -0.84339100 |
| C | -5.95922600 | -2.30916500 | 0.66356200  |
| H | -6.66605100 | -1.03520400 | 2.25340800  |
| H | -4.97781400 | -3.41938300 | -0.90289000 |
| H | -6.85360600 | -2.92508200 | 0.65231900  |
| C | -2.54577900 | 1.83318900  | -0.20067300 |
| C | -3.83706400 | 2.37863300  | -0.18058400 |
| C | -1.51830900 | 2.54359400  | -0.84025300 |
| C | -4.08877700 | 3.61446400  | -0.77690800 |
| H | -4.64987800 | 1.83355100  | 0.28786900  |
| C | -1.76724300 | 3.78685400  | -1.42069900 |
| H | -0.52355000 | 2.11636700  | -0.88442300 |
| C | -3.05445600 | 4.32477300  | -1.39073500 |
| H | -5.09500300 | 4.02355700  | -0.76294700 |
| H | -0.95340600 | 4.32475500  | -1.89788200 |
| H | -3.25481600 | 5.28862100  | -1.84953000 |
| C | 1.10931000  | -1.76315000 | -1.65303600 |
| C | 2.51260500  | -1.82677700 | -1.54366700 |
| C | 0.50137000  | -1.20510100 | -2.79519300 |
| C | 3.28745500  | -1.19007400 | -2.49990100 |
| H | 2.96700100  | -2.31110300 | -0.68873200 |
| C | 1.30915500  | -0.55561300 | -3.73940000 |
| H | -0.57009800 | -1.28511200 | -2.93851700 |
| C | 2.69379100  | -0.53939900 | -3.59734500 |
| H | 4.36798900  | -1.18704900 | -2.38744400 |
| H | 0.84184200  | -0.09156500 | -4.60354400 |

|    |            |             |             |
|----|------------|-------------|-------------|
| H  | 3.31539700 | -0.05514800 | -4.34368100 |
| Br | 0.00567800 | -3.37870100 | -0.78215700 |

6<sub>c</sub>

|    |             |             |             |
|----|-------------|-------------|-------------|
| P  | -1.48694900 | -0.19921000 | -1.13580400 |
| C  | -0.82436600 | -0.40295900 | -2.86898600 |
| H  | -0.63952700 | -1.47442900 | -2.99514900 |
| H  | -1.63491900 | -0.14458500 | -3.55665200 |
| C  | 0.45498700  | 0.37983700  | -3.20457400 |
| H  | 0.53266700  | 0.45400800  | -4.29538900 |
| H  | 0.39159600  | 1.40925200  | -2.83060700 |
| C  | 1.72836800  | -0.29531200 | -2.67256300 |
| H  | 2.60933900  | 0.09028100  | -3.19225200 |
| H  | 1.68717100  | -1.37080000 | -2.86965900 |
| P  | 1.98432300  | -0.03222900 | -0.84255300 |
| Pd | 0.03702100  | 0.27657100  | 0.49349500  |
| C  | -2.23313800 | -1.84310300 | -0.84780300 |
| C  | -3.46476500 | -2.21377000 | -1.40258900 |
| C  | -1.49358800 | -2.78410400 | -0.11586100 |
| C  | -3.95222300 | -3.50816500 | -1.22166800 |
| H  | -4.04755900 | -1.48869200 | -1.96131200 |
| C  | -1.98030600 | -4.07918100 | 0.05562900  |
| H  | -0.54760800 | -2.48917300 | 0.33097000  |
| C  | -3.21122800 | -4.44165900 | -0.49458300 |
| H  | -4.91163200 | -3.78679200 | -1.64707400 |
| H  | -1.40453600 | -4.79841200 | 0.63001100  |
| H  | -3.59512000 | -5.44736100 | -0.35246300 |
| C  | -2.88379400 | 0.95841300  | -1.33961900 |
| C  | -2.82952800 | 1.97139500  | -2.30778500 |
| C  | -3.97380700 | 0.91237000  | -0.45693400 |
| C  | -3.85499300 | 2.91171200  | -2.40427200 |
| H  | -1.98511400 | 2.04099600  | -2.98592300 |
| C  | -4.99906100 | 1.84928200  | -0.56276800 |
| H  | -4.01289600 | 0.15978500  | 0.32167200  |
| C  | -4.94423100 | 2.84947600  | -1.53461000 |
| H  | -3.80086900 | 3.69121400  | -3.15819100 |
| H  | -5.83297100 | 1.80390400  | 0.13038700  |
| H  | -5.74232700 | 3.58189200  | -1.60914800 |
| C  | 2.91214000  | -1.51563200 | -0.32074300 |
| C  | 2.39982900  | -2.78450600 | -0.63185300 |
| C  | 4.03481200  | -1.41611900 | 0.51011100  |
| C  | 3.01832800  | -3.93451500 | -0.14625000 |
| H  | 1.50380700  | -2.88021200 | -1.23900300 |
| C  | 4.65116000  | -2.56971400 | 0.99459000  |
| H  | 4.41483200  | -0.44009100 | 0.78710500  |
| C  | 4.14940100  | -3.82905800 | 0.66586000  |
| H  | 2.61481800  | -4.91104500 | -0.39725100 |

|    |             |             |             |
|----|-------------|-------------|-------------|
| H  | 5.52075200  | -2.48146600 | 1.63861700  |
| H  | 4.63050100  | -4.72440100 | 1.04764800  |
| C  | 3.18297000  | 1.34777100  | -0.82213300 |
| C  | 4.41077000  | 1.24895400  | -1.49580000 |
| C  | 2.85698700  | 2.53454600  | -0.15467900 |
| C  | 5.29611200  | 2.32410700  | -1.50517400 |
| H  | 4.68235900  | 0.32464400  | -1.99794100 |
| C  | 3.74301300  | 3.61307800  | -0.17322000 |
| H  | 1.92993500  | 2.59254700  | 0.40374900  |
| C  | 4.95994900  | 3.50992600  | -0.84626700 |
| H  | 6.24731000  | 2.23744200  | -2.02183800 |
| H  | 3.48425300  | 4.52856100  | 0.34970000  |
| H  | 5.65048700  | 4.34807200  | -0.85374900 |
| C  | -1.58454500 | 0.58078600  | 1.69897100  |
| C  | -2.26828800 | -0.46201300 | 2.33123900  |
| C  | -2.03458200 | 1.89290200  | 1.88419300  |
| C  | -3.39670200 | -0.20004700 | 3.11619900  |
| H  | -1.93751300 | -1.48768600 | 2.20735300  |
| C  | -3.15570000 | 2.15768000  | 2.67350500  |
| H  | -1.51774700 | 2.71760200  | 1.40156100  |
| C  | -3.84719100 | 1.11015800  | 3.28526600  |
| H  | -3.92161400 | -1.02289900 | 3.59530000  |
| H  | -3.49329800 | 3.18279300  | 2.80354300  |
| H  | -4.72432600 | 1.31373400  | 3.89315500  |
| Br | 1.52815500  | 0.57101200  | 2.49395400  |

### TS6<sub>c</sub>

|   |             |             |             |
|---|-------------|-------------|-------------|
| P | -2.02702300 | -0.03441400 | -0.44878000 |
| C | -1.89677300 | 0.14820600  | -2.28481700 |
| H | -1.68422200 | -0.87093600 | -2.62440200 |
| H | -2.88396400 | 0.42896400  | -2.66783200 |
| C | -0.82062400 | 1.11023100  | -2.82460000 |
| H | -1.00914800 | 1.22485800  | -3.89836100 |
| H | -0.93747200 | 2.10844800  | -2.38914400 |
| C | 0.63609800  | 0.64293200  | -2.66182200 |
| H | 1.29752500  | 1.24598700  | -3.29148400 |
| H | 0.73245400  | -0.40669900 | -2.95475900 |
| P | 1.21983000  | 0.71857600  | -0.91072500 |
| C | -3.44608600 | -1.16535200 | -0.23062400 |
| C | -4.74475800 | -0.68496200 | -0.01177400 |
| C | -3.21241800 | -2.54795200 | -0.29004100 |
| C | -5.80195400 | -1.58058500 | 0.14734400  |
| H | -4.92896500 | 0.38284100  | 0.04440300  |
| C | -4.27694800 | -3.43488100 | -0.13686800 |
| H | -2.20589200 | -2.91669800 | -0.47130000 |
| C | -5.56937100 | -2.95536600 | 0.08564500  |
| H | -6.80520600 | -1.20366400 | 0.32313900  |
| H | -4.09192700 | -4.50360500 | -0.18518700 |

|    |             |             |             |
|----|-------------|-------------|-------------|
| H  | -6.39337700 | -3.65119200 | 0.21364500  |
| C  | -2.62075900 | 1.56823300  | 0.20255500  |
| C  | -3.04517600 | 2.62507300  | -0.61090200 |
| C  | -2.61066400 | 1.74304500  | 1.59600600  |
| C  | -3.42816400 | 3.84277600  | -0.04424700 |
| H  | -3.07716600 | 2.50861900  | -1.68810000 |
| C  | -3.01295500 | 2.94941400  | 2.16122600  |
| H  | -2.26950300 | 0.92875800  | 2.22946900  |
| C  | -3.41216500 | 4.00785700  | 1.33965000  |
| H  | -3.74046900 | 4.66001200  | -0.68720000 |
| H  | -3.00509300 | 3.06956000  | 3.24043400  |
| H  | -3.71003500 | 4.95532300  | 1.77834800  |
| C  | 3.00199100  | 0.33341200  | -0.96715900 |
| C  | 3.41677900  | -0.86988400 | -1.56094900 |
| C  | 3.94535100  | 1.15534500  | -0.33660800 |
| C  | 4.76513000  | -1.22085500 | -1.54766900 |
| H  | 2.67944200  | -1.54636700 | -1.98297800 |
| C  | 5.29138500  | 0.78982200  | -0.31789300 |
| H  | 3.62938100  | 2.07623200  | 0.14118700  |
| C  | 5.70497500  | -0.39381500 | -0.92928000 |
| H  | 5.07847500  | -2.15159000 | -2.01123500 |
| H  | 6.01562500  | 1.43215900  | 0.17441400  |
| H  | 6.75400300  | -0.67500500 | -0.91676300 |
| C  | 1.11049100  | 2.49678200  | -0.49546700 |
| C  | 1.60324100  | 3.49590400  | -1.34924900 |
| C  | 0.46058900  | 2.86799200  | 0.68728500  |
| C  | 1.43426000  | 4.84093400  | -1.02698700 |
| H  | 2.12273200  | 3.22241100  | -2.26264000 |
| C  | 0.28797500  | 4.21443100  | 1.00857000  |
| H  | 0.07264900  | 2.09092000  | 1.33623500  |
| C  | 0.77159400  | 5.20114300  | 0.15007800  |
| H  | 1.81580900  | 5.60869700  | -1.69349100 |
| H  | -0.23785500 | 4.48681200  | 1.91766100  |
| H  | 0.63358000  | 6.25033600  | 0.39398500  |
| Pd | -0.01893200 | -0.74535400 | 0.49833500  |
| C  | 2.42365900  | -2.28636000 | 1.41861200  |
| C  | 1.52872000  | -1.33636600 | 1.92063000  |
| C  | 1.96154000  | -0.34084200 | 2.80539400  |
| C  | 3.30710300  | -0.27918900 | 3.16592100  |
| C  | 4.20818100  | -1.21543300 | 2.65232500  |
| C  | 3.76623300  | -2.22045300 | 1.78964200  |
| H  | 2.07308600  | -3.02417400 | 0.70357100  |
| H  | 3.65349900  | 0.50067200  | 3.83797400  |
| H  | 5.25850200  | -1.15810200 | 2.92188300  |
| H  | 4.47240700  | -2.93654000 | 1.38137600  |
| H  | 1.25436000  | 0.38317800  | 3.19840800  |
| C  | -0.30790800 | -1.79996300 | 2.05237500  |
| O  | -0.74835500 | -2.46517000 | 2.90254000  |

|    |             |             |             |
|----|-------------|-------------|-------------|
| Br | 0.28259800  | -2.77093300 | -1.52000600 |
| 7c |             |             |             |
| P  | -2.02699700 | -0.03439500 | -0.44867600 |
| C  | -1.89669800 | 0.14811200  | -2.28471200 |
| H  | -1.68401800 | -0.87103300 | -2.62420100 |
| H  | -2.88389400 | 0.42875000  | -2.66780300 |
| C  | -0.82061300 | 1.11021900  | -2.82448400 |
| H  | -1.00913700 | 1.22482900  | -3.89824600 |
| H  | -0.93756400 | 2.10843000  | -2.38903500 |
| C  | 0.63617300  | 0.64311100  | -2.66169000 |
| H  | 1.29750300  | 1.24636600  | -3.29126400 |
| H  | 0.73279400  | -0.40647400 | -2.95469500 |
| P  | 1.21987800  | 0.71870800  | -0.91057800 |
| C  | -3.44595100 | -1.16544900 | -0.23043600 |
| C  | -4.74480000 | -0.68516500 | -0.01241200 |
| C  | -3.21200300 | -2.54804200 | -0.28893000 |
| C  | -5.80190600 | -1.58088900 | 0.14673400  |
| H  | -4.92921500 | 0.38263900  | 0.04308300  |
| C  | -4.27644200 | -3.43507700 | -0.13574200 |
| H  | -2.20530500 | -2.91669000 | -0.46941300 |
| C  | -5.56905200 | -2.95566400 | 0.08589600  |
| H  | -6.80530300 | -1.20405100 | 0.32187600  |
| H  | -4.09120700 | -4.50379600 | -0.18334800 |
| H  | -6.39299300 | -3.65156200 | 0.21390600  |
| C  | -2.62087600 | 1.56823000  | 0.20257200  |
| C  | -3.04535700 | 2.62500000  | -0.61094300 |
| C  | -2.61086700 | 1.74308600  | 1.59601800  |
| C  | -3.42849700 | 3.84268200  | -0.04434500 |
| H  | -3.07727000 | 2.50850900  | -1.68814000 |
| C  | -3.01330400 | 2.94943400  | 2.16117800  |
| H  | -2.26966400 | 0.92884900  | 2.22952500  |
| C  | -3.41258400 | 4.00780900  | 1.33954800  |
| H  | -3.74085200 | 4.65986700  | -0.68734000 |
| H  | -3.00550700 | 3.06961700  | 3.24038200  |
| H  | -3.71057300 | 4.95525800  | 1.77820000  |
| C  | 3.00206200  | 0.33360700  | -0.96701300 |
| C  | 3.41683900  | -0.86987000 | -1.56044000 |
| C  | 3.94547300  | 1.15581400  | -0.33689100 |
| C  | 4.76521800  | -1.22073100 | -1.54729100 |
| H  | 2.67946100  | -1.54657500 | -1.98204100 |
| C  | 5.29154200  | 0.79040100  | -0.31829700 |
| H  | 3.62953000  | 2.07684300  | 0.14064500  |
| C  | 5.70511600  | -0.39340600 | -0.92936800 |
| H  | 5.07854500  | -2.15160800 | -2.01058300 |
| H  | 6.01582100  | 1.43295800  | 0.17366800  |
| H  | 6.75416900  | -0.67451000 | -0.91694900 |
| C  | 1.11046600  | 2.49690300  | -0.49530900 |

|    |             |             |             |
|----|-------------|-------------|-------------|
| C  | 1.60342500  | 3.49603400  | -1.34896100 |
| C  | 0.46030300  | 2.86809900  | 0.68730200  |
| C  | 1.43438100  | 4.84106000  | -1.02671600 |
| H  | 2.12313600  | 3.22254600  | -2.26222800 |
| C  | 0.28761600  | 4.21453300  | 1.00856400  |
| H  | 0.07225400  | 2.09101500  | 1.33617200  |
| C  | 0.77143900  | 5.20125500  | 0.15019800  |
| H  | 1.81609600  | 5.60883200  | -1.69311600 |
| H  | -0.23841700 | 4.48690300  | 1.91754200  |
| H  | 0.63337700  | 6.25044500  | 0.39409100  |
| Pd | -0.01889700 | -0.74534800 | 0.49835000  |
| C  | 2.42343600  | -2.28675500 | 1.41845000  |
| C  | 1.52869900  | -1.33657800 | 1.92047300  |
| C  | 1.96174200  | -0.34110800 | 2.80518500  |
| C  | 3.30733700  | -0.27967600 | 3.16562600  |
| C  | 4.20821700  | -1.21611200 | 2.65202900  |
| C  | 3.76603700  | -2.22109800 | 1.78942600  |
| H  | 2.07267900  | -3.02455800 | 0.70348700  |
| H  | 3.65391200  | 0.50015100  | 3.83762400  |
| H  | 5.25856200  | -1.15896500 | 2.92153400  |
| H  | 4.47205600  | -2.93734200 | 1.38116700  |
| H  | 1.25471100  | 0.38304000  | 3.19823200  |
| C  | -0.30782500 | -1.80027300 | 2.05220300  |
| O  | -0.74818600 | -2.46577600 | 2.90218200  |
| Br | 0.28244000  | -2.77051900 | -1.52028600 |

#### R<sub>4</sub>

|    |             |             |             |
|----|-------------|-------------|-------------|
| C  | -1.57298700 | -1.20726500 | 0.00000200  |
| C  | -0.17771500 | -1.21605700 | 0.00000400  |
| C  | 0.50374600  | -0.00001500 | -0.00001200 |
| C  | -0.17771000 | 1.21605100  | -0.00000500 |
| C  | -1.57296100 | 1.20728300  | 0.00001000  |
| C  | -2.27304700 | 0.00000300  | -0.00000500 |
| H  | -2.11087200 | -2.15037800 | 0.00000500  |
| H  | 0.37624500  | -2.14787300 | 0.00000200  |
| H  | 0.37629600  | 2.14784100  | -0.00000800 |
| H  | -2.11086600 | 2.15038300  | 0.00001400  |
| H  | -3.35833000 | 0.00002700  | -0.00001000 |
| Cl | 2.26185700  | 0.00000000  | 0.00000200  |

#### COM<sub>R<sub>4</sub>-Pd(dppp)</sub>

|   |             |             |             |
|---|-------------|-------------|-------------|
| P | 1.60529900  | 0.14145100  | -1.04486000 |
| C | 1.07827400  | 0.05727500  | -2.83262700 |
| H | 1.38279800  | 0.96037000  | -3.37249300 |
| H | 1.66375100  | -0.76291200 | -3.26102400 |
| C | -0.41952600 | -0.23406300 | -3.04809500 |
| H | -0.61868500 | -0.17441100 | -4.12447500 |

|   |             |             |             |
|---|-------------|-------------|-------------|
| H | -0.61816400 | -1.27315100 | -2.75997500 |
| C | -1.40092900 | 0.69653000  | -2.30419300 |
| H | -2.32580500 | 0.81714000  | -2.87586200 |
| H | -0.97159000 | 1.69329700  | -2.17669800 |
| P | -1.82846200 | 0.01501200  | -0.61188500 |
| C | 1.49882700  | 1.92948400  | -0.59689800 |
| C | 1.38203700  | 2.98495200  | -1.51085800 |
| C | 1.47152500  | 2.22509300  | 0.77744900  |
| C | 1.22972700  | 4.30132200  | -1.06584700 |
| H | 1.39444700  | 2.79291800  | -2.57819400 |
| C | 1.33239000  | 3.53790300  | 1.22083400  |
| H | 1.53121000  | 1.41495300  | 1.49754500  |
| C | 1.20419700  | 4.58107500  | 0.30030400  |
| H | 1.12808900  | 5.10516100  | -1.78914100 |
| H | 1.30309600  | 3.74312500  | 2.28663400  |
| H | 1.08057300  | 5.60327500  | 0.64540400  |
| C | 3.41905200  | -0.13575000 | -1.16787200 |
| C | 3.90213900  | -1.39456700 | -0.78221200 |
| C | 4.32311700  | 0.83895700  | -1.61286100 |
| C | 5.26588100  | -1.68016400 | -0.85939200 |
| H | 3.20511400  | -2.14045200 | -0.41088400 |
| C | 5.68615400  | 0.55371700  | -1.68309900 |
| H | 3.96248200  | 1.82482100  | -1.89013200 |
| C | 6.15904200  | -0.70677400 | -1.30955000 |
| H | 5.63023100  | -2.65799300 | -0.55827000 |
| H | 6.38087300  | 1.31522800  | -2.02590100 |
| H | 7.22161400  | -0.92529700 | -1.36180700 |
| C | -2.71561300 | 1.42005900  | 0.16511000  |
| C | -3.93595300 | 1.25179800  | 0.83630900  |
| C | -2.08241000 | 2.67341900  | 0.21906900  |
| C | -4.51883200 | 2.31654200  | 1.52438800  |
| H | -4.43439800 | 0.28833000  | 0.81692900  |
| C | -2.66820400 | 3.73431200  | 0.90533200  |
| H | -1.12130200 | 2.82298200  | -0.25852100 |
| C | -3.89042300 | 3.56201700  | 1.55872400  |
| H | -5.46715600 | 2.17093600  | 2.03385900  |
| H | -2.16122000 | 4.69439500  | 0.93276300  |
| H | -4.34583000 | 4.38925100  | 2.09495100  |
| C | -3.15110100 | -1.18097900 | -1.05576500 |
| C | -4.32879000 | -0.80308200 | -1.71954400 |
| C | -2.94551400 | -2.53231300 | -0.75058100 |
| C | -5.28205600 | -1.75859800 | -2.06477900 |
| H | -4.50580400 | 0.24325500  | -1.95135000 |
| C | -3.89646100 | -3.49189600 | -1.10427900 |
| H | -2.03074900 | -2.81845800 | -0.23779900 |
| C | -5.06540300 | -3.10558700 | -1.75945800 |
| H | -6.19312500 | -1.45576800 | -2.57273600 |
| H | -3.72406400 | -4.53731800 | -0.86629300 |



|    |             |             |             |
|----|-------------|-------------|-------------|
| H  | -5.80824900 | -3.84950200 | -2.03194600 |
| Pd | 0.07925400  | -0.85261600 | 0.43292600  |
| C  | 2.15368200  | -1.26154700 | 2.68009100  |
| C  | 1.08700800  | -2.00985600 | 2.10893100  |
| C  | -0.26395700 | -1.76946900 | 2.50527600  |
| C  | -0.50301400 | -0.71161600 | 3.42941200  |
| C  | 0.53365500  | 0.04515400  | 3.93296500  |
| C  | 1.87210800  | -0.23807800 | 3.55924900  |
| H  | 3.17206700  | -1.49796500 | 2.39295700  |
| H  | -1.52451800 | -0.52582400 | 3.74724400  |
| H  | 0.32921700  | 0.84428500  | 4.63852200  |
| H  | 2.68585500  | 0.35126000  | 3.97099100  |
| H  | -1.03039700 | -2.51277500 | 2.31988100  |
| Cl | 1.48985900  | -3.60243500 | 1.39348200  |

**COM<sub>R<sub>4</sub></sub>-Pd(dppp)**

|   |             |             |             |
|---|-------------|-------------|-------------|
| P | 1.25647800  | 0.31857400  | -1.09289600 |
| C | 0.61641200  | 0.21298300  | -2.84404000 |
| H | 0.78584600  | 1.19203000  | -3.30361900 |
| H | 1.24737300  | -0.50070100 | -3.37836400 |
| C | -0.85541700 | -0.19647500 | -2.99674600 |
| H | -1.11856100 | -0.10161200 | -4.05599300 |
| H | -0.96613100 | -1.25873100 | -2.74819500 |
| C | -1.83073100 | 0.64030200  | -2.14788600 |
| H | -2.81269900 | 0.69653200  | -2.62547800 |
| H | -1.45653400 | 1.66207900  | -2.03090000 |
| P | -2.00573200 | -0.12249400 | -0.46242900 |
| C | 1.11743800  | 2.10157800  | -0.69090500 |
| C | 1.67156300  | 3.08684500  | -1.52340700 |
| C | 0.40797100  | 2.49036900  | 0.45222700  |
| C | 1.49506100  | 4.43602900  | -1.22576500 |
| H | 2.25160700  | 2.79893300  | -2.39553900 |
| C | 0.22023100  | 3.84239300  | 0.74247200  |
| H | -0.00583400 | 1.72931400  | 1.10374800  |
| C | 0.76085300  | 4.81502500  | -0.09733700 |
| H | 1.92761900  | 5.19303000  | -1.87298500 |
| H | -0.35487400 | 4.12549600  | 1.61814400  |
| H | 0.61646100  | 5.86798000  | 0.12530700  |
| C | 3.04869200  | 0.02090700  | -1.27524700 |
| C | 3.51926700  | -1.03148800 | -2.07163600 |
| C | 3.95557200  | 0.73702900  | -0.48284600 |
| C | 4.87628700  | -1.34668600 | -2.09418400 |
| H | 2.82990900  | -1.63155200 | -2.65710400 |
| C | 5.30961800  | 0.41132900  | -0.49812900 |
| H | 3.59925000  | 1.53194700  | 0.16160700  |
| C | 5.77425800  | -0.62676600 | -1.30617900 |
| H | 5.22858400  | -2.16371200 | -2.71640000 |

|    |             |             |             |
|----|-------------|-------------|-------------|
| H  | 6.00018900  | 0.96377200  | 0.13108700  |
| H  | 6.82974300  | -0.88077100 | -1.31340700 |
| C  | -2.75819800 | 1.20131500  | 0.55262200  |
| C  | -2.68435900 | 1.07560700  | 1.94992000  |
| C  | -3.33040800 | 2.35293200  | -0.00509500 |
| C  | -3.17217300 | 2.09363300  | 2.76774600  |
| H  | -2.23267900 | 0.18597200  | 2.38168600  |
| C  | -3.81478900 | 3.36949900  | 0.81898900  |
| H  | -3.39306800 | 2.47119200  | -1.08144100 |
| C  | -3.73296100 | 3.24341900  | 2.20606300  |
| H  | -3.10795300 | 1.98948600  | 3.84666700  |
| H  | -4.25120700 | 4.25999700  | 0.37629400  |
| H  | -4.10542200 | 4.03725000  | 2.84684600  |
| C  | -3.32174500 | -1.36153000 | -0.73318400 |
| C  | -4.61531600 | -0.97640700 | -1.11511500 |
| C  | -3.01652500 | -2.71952500 | -0.58323500 |
| C  | -5.58821600 | -1.94168600 | -1.36159200 |
| H  | -4.86491900 | 0.07744700  | -1.20303300 |
| C  | -3.99426200 | -3.68399600 | -0.83520400 |
| H  | -2.03119200 | -3.00718200 | -0.23387900 |
| C  | -5.27579400 | -3.29766400 | -1.22604700 |
| H  | -6.58989800 | -1.63948800 | -1.65262800 |
| H  | -3.75478400 | -4.73572600 | -0.71218300 |
| H  | -6.03618900 | -4.04954000 | -1.41567000 |
| Pd | 0.09316100  | -0.87285400 | 0.46299900  |
| C  | 2.69937300  | -2.31886300 | 0.94902600  |
| C  | 1.88376100  | -1.25596000 | 1.34383900  |
| C  | 2.33113100  | -0.39455400 | 2.35069100  |
| C  | 3.58248800  | -0.58607600 | 2.94434000  |
| C  | 4.39730600  | -1.64329700 | 2.53844200  |
| C  | 3.94894800  | -2.51291600 | 1.54287500  |
| H  | 2.37390700  | -2.99388100 | 0.16246500  |
| H  | 3.91802600  | 0.09234600  | 3.72506600  |
| H  | 5.37255000  | -1.78961000 | 2.99420400  |
| H  | 4.57560500  | -3.34064900 | 1.22069000  |
| H  | 1.70736500  | 0.43139300  | 2.68145500  |
| Cl | -0.99886600 | -2.08392900 | 2.22239000  |

#### TS5<sub>d</sub>

|   |             |             |             |
|---|-------------|-------------|-------------|
| P | 1.35155800  | -0.00818400 | -1.19616700 |
| C | 0.64207300  | -0.26416300 | -2.90228300 |
| H | 0.90637300  | 0.58017000  | -3.54733200 |
| H | 1.17924900  | -1.12854300 | -3.30407400 |
| C | -0.87048200 | -0.54549500 | -2.95879700 |
| H | -1.16013700 | -0.58012200 | -4.01538500 |
| H | -1.05908000 | -1.54895100 | -2.55942100 |
| C | -1.76651600 | 0.47192600  | -2.22335400 |
| H | -2.73150300 | 0.57494100  | -2.72728200 |

|    |             |             |             |
|----|-------------|-------------|-------------|
| H  | -1.30977500 | 1.46527000  | -2.21062900 |
| P  | -2.05225200 | -0.03221700 | -0.44759800 |
| C  | 1.45526300  | 1.80828700  | -0.94975000 |
| C  | 1.10241900  | 2.76884000  | -1.90613400 |
| C  | 1.81808800  | 2.24009600  | 0.33944600  |
| C  | 1.09008100  | 4.12732600  | -1.57919500 |
| H  | 0.82046600  | 2.47112500  | -2.90967900 |
| C  | 1.82368100  | 3.59544300  | 0.65753300  |
| H  | 2.07713800  | 1.51054900  | 1.09854300  |
| C  | 1.44822400  | 4.54442500  | -0.29765900 |
| H  | 0.79862200  | 4.85705800  | -2.32872300 |
| H  | 2.10437700  | 3.90735300  | 1.65894600  |
| H  | 1.43452200  | 5.60012800  | -0.04403000 |
| C  | 3.09593900  | -0.52040600 | -1.42778700 |
| C  | 3.34084000  | -1.88768300 | -1.63863300 |
| C  | 4.18463400  | 0.34978600  | -1.29633100 |
| C  | 4.64359400  | -2.36872500 | -1.74157500 |
| H  | 2.50439800  | -2.58016700 | -1.69967300 |
| C  | 5.49024300  | -0.13582500 | -1.38677500 |
| H  | 4.01433300  | 1.40567600  | -1.11771200 |
| C  | 5.72440200  | -1.49242400 | -1.61207900 |
| H  | 4.81653300  | -3.42803100 | -1.90668200 |
| H  | 6.32579300  | 0.55037500  | -1.28332200 |
| H  | 6.74107700  | -1.86737100 | -1.68024600 |
| C  | -2.77689700 | 1.49432100  | 0.26920000  |
| C  | -4.06390600 | 1.55465200  | 0.81901400  |
| C  | -1.95409400 | 2.63239100  | 0.33520400  |
| C  | -4.52460100 | 2.73530900  | 1.40585000  |
| H  | -4.70681100 | 0.68178200  | 0.79094700  |
| C  | -2.42098300 | 3.81002800  | 0.91179400  |
| H  | -0.94202000 | 2.59564200  | -0.05102000 |
| C  | -3.70953300 | 3.86617900  | 1.44957400  |
| H  | -5.52448700 | 2.76827500  | 1.82889400  |
| H  | -1.77088600 | 4.67922400  | 0.94757900  |
| H  | -4.07188800 | 4.78266000  | 1.90565500  |
| C  | -3.44531200 | -1.21590900 | -0.58236800 |
| C  | -4.60560100 | -0.95568000 | -1.32837100 |
| C  | -3.32640200 | -2.43752100 | 0.09476200  |
| C  | -5.62853700 | -1.89940400 | -1.39353800 |
| H  | -4.71787600 | -0.00776400 | -1.84652200 |
| C  | -4.35189300 | -3.38282200 | 0.02700400  |
| H  | -2.42757500 | -2.64156000 | 0.67075300  |
| C  | -5.50136000 | -3.11548400 | -0.71606500 |
| H  | -6.52423300 | -1.68846100 | -1.97043600 |
| H  | -4.24918700 | -4.32644500 | 0.55415200  |
| H  | -6.29863300 | -3.85103600 | -0.76910100 |
| Pd | -0.03205100 | -0.83284300 | 0.52886900  |
| C  | 2.76087600  | -1.57989300 | 1.71836900  |

|    |            |             |            |
|----|------------|-------------|------------|
| C  | 1.42749100 | -1.27524000 | 2.03594400 |
| C  | 1.12127700 | -0.31038800 | 3.01294800 |
| C  | 2.15877600 | 0.46673300  | 3.54072200 |
| C  | 3.48027100 | 0.24240700  | 3.15643000 |
| C  | 3.77193800 | -0.79284900 | 2.25322600 |
| H  | 2.98567300 | -2.36608500 | 1.00919600 |
| H  | 1.92391600 | 1.23616400  | 4.27133900 |
| H  | 4.28232600 | 0.84067500  | 3.57678400 |
| H  | 4.79802000 | -0.97791800 | 1.94851300 |
| H  | 0.09559000 | -0.17119700 | 3.33713800 |
| Cl | 0.10979400 | -2.91741600 | 2.12843500 |

6<sub>a</sub>

|   |             |             |             |
|---|-------------|-------------|-------------|
| P | 1.25647800  | 0.31857400  | -1.09289600 |
| C | 0.61641200  | 0.21298300  | -2.84404000 |
| H | 0.78584600  | 1.19203000  | -3.30361900 |
| H | 1.24737300  | -0.50070100 | -3.37836400 |
| C | -0.85541700 | -0.19647500 | -2.99674600 |
| H | -1.11856100 | -0.10161200 | -4.05599300 |
| H | -0.96613100 | -1.25873100 | -2.74819500 |
| C | -1.83073100 | 0.64030200  | -2.14788600 |
| H | -2.81269900 | 0.69653200  | -2.62547800 |
| H | -1.45653400 | 1.66207900  | -2.03090000 |
| P | -2.00573200 | -0.12249400 | -0.46242900 |
| C | 1.11743800  | 2.10157800  | -0.69090500 |
| C | 1.67156300  | 3.08684500  | -1.52340700 |
| C | 0.40797100  | 2.49036900  | 0.45222700  |
| C | 1.49506100  | 4.43602900  | -1.22576500 |
| H | 2.25160700  | 2.79893300  | -2.39553900 |
| C | 0.22023100  | 3.84239300  | 0.74247200  |
| H | -0.00583400 | 1.72931400  | 1.10374800  |
| C | 0.76085300  | 4.81502500  | -0.09733700 |
| H | 1.92761900  | 5.19303000  | -1.87298500 |
| H | -0.35487400 | 4.12549600  | 1.61814400  |
| H | 0.61646100  | 5.86798000  | 0.12530700  |
| C | 3.04869200  | 0.02090700  | -1.27524700 |
| C | 3.51926700  | -1.03148800 | -2.07163600 |
| C | 3.95557200  | 0.73702900  | -0.48284600 |
| C | 4.87628700  | -1.34668600 | -2.09418400 |
| H | 2.82990900  | -1.63155200 | -2.65710400 |
| C | 5.30961800  | 0.41132900  | -0.49812900 |
| H | 3.59925000  | 1.53194700  | 0.16160700  |
| C | 5.77425800  | -0.62676600 | -1.30617900 |
| H | 5.22858400  | -2.16371200 | -2.71640000 |
| H | 6.00018900  | 0.96377200  | 0.13108700  |
| H | 6.82974300  | -0.88077100 | -1.31340700 |
| C | -2.75819800 | 1.20131500  | 0.55262200  |
| C | -2.68435900 | 1.07560700  | 1.94992000  |

|    |             |             |             |
|----|-------------|-------------|-------------|
| C  | -3.33040800 | 2.35293200  | -0.00509500 |
| C  | -3.17217300 | 2.09363300  | 2.76774600  |
| H  | -2.23267900 | 0.18597200  | 2.38168600  |
| C  | -3.81478900 | 3.36949900  | 0.81898900  |
| H  | -3.39306800 | 2.47119200  | -1.08144100 |
| C  | -3.73296100 | 3.24341900  | 2.20606300  |
| H  | -3.10795300 | 1.98948600  | 3.84666700  |
| H  | -4.25120700 | 4.25999700  | 0.37629400  |
| H  | -4.10542200 | 4.03725000  | 2.84684600  |
| C  | -3.32174500 | -1.36153000 | -0.73318400 |
| C  | -4.61531600 | -0.97640700 | -1.11511500 |
| C  | -3.01652500 | -2.71952500 | -0.58323500 |
| C  | -5.58821600 | -1.94168600 | -1.36159200 |
| H  | -4.86491900 | 0.07744700  | -1.20303300 |
| C  | -3.99426200 | -3.68399600 | -0.83520400 |
| H  | -2.03119200 | -3.00718200 | -0.23387900 |
| C  | -5.27579400 | -3.29766400 | -1.22604700 |
| H  | -6.58989800 | -1.63948800 | -1.65262800 |
| H  | -3.75478400 | -4.73572600 | -0.71218300 |
| H  | -6.03618900 | -4.04954000 | -1.41567000 |
| Pd | 0.09316100  | -0.87285400 | 0.46299900  |
| C  | 2.69937300  | -2.31886300 | 0.94902600  |
| C  | 1.88376100  | -1.25596000 | 1.34383900  |
| C  | 2.33113100  | -0.39455400 | 2.35069100  |
| C  | 3.58248800  | -0.58607600 | 2.94434000  |
| C  | 4.39730600  | -1.64329700 | 2.53844200  |
| C  | 3.94894800  | -2.51291600 | 1.54287500  |
| H  | 2.37390700  | -2.99388100 | 0.16246500  |
| H  | 3.91802600  | 0.09234600  | 3.72506600  |
| H  | 5.37255000  | -1.78961000 | 2.99420400  |
| H  | 4.57560500  | -3.34064900 | 1.22069000  |
| H  | 1.70736500  | 0.43139300  | 2.68145500  |
| Cl | -0.99886600 | -2.08392900 | 2.22239000  |

#### TS6<sub>d</sub>

|   |             |             |             |
|---|-------------|-------------|-------------|
| P | -2.04331600 | -0.11548800 | -0.58072500 |
| C | -1.87599900 | 0.17576500  | -2.39179200 |
| H | -1.66980600 | -0.81932400 | -2.79814500 |
| H | -2.84426500 | 0.50599300  | -2.78253100 |
| C | -0.75801200 | 1.15202200  | -2.79874700 |
| H | -0.90229100 | 1.38826100  | -3.85924500 |
| H | -0.85292900 | 2.10183400  | -2.26106300 |
| C | 0.66546800  | 0.60048100  | -2.64014400 |
| H | 1.37353800  | 1.22379900  | -3.19543500 |
| H | 0.71896900  | -0.42141900 | -3.02324000 |
| P | 1.27772600  | 0.51228300  | -0.89711400 |
| C | -3.45271300 | -1.27019100 | -0.43995100 |
| C | -4.75799900 | -0.81800300 | -0.20165100 |

|    |             |             |             |
|----|-------------|-------------|-------------|
| C  | -3.20024500 | -2.64496900 | -0.57399900 |
| C  | -5.80442800 | -1.73414200 | -0.09700500 |
| H  | -4.95529900 | 0.24296600  | -0.08889000 |
| C  | -4.25489900 | -3.55158800 | -0.47401800 |
| H  | -2.18647300 | -2.98738100 | -0.77172200 |
| C  | -5.55427500 | -3.10062300 | -0.23266200 |
| H  | -6.81326400 | -1.37991300 | 0.09323400  |
| H  | -4.05702600 | -4.61375800 | -0.58126400 |
| H  | -6.37028700 | -3.81228500 | -0.14803300 |
| C  | -2.66136500 | 1.45326300  | 0.13461400  |
| C  | -3.08939700 | 2.53927800  | -0.63850800 |
| C  | -2.65772000 | 1.57816300  | 1.53352900  |
| C  | -3.48488800 | 3.73130800  | -0.02795100 |
| H  | -3.11288500 | 2.46665100  | -1.71974900 |
| C  | -3.06766000 | 2.76051800  | 2.14322500  |
| H  | -2.31373500 | 0.74677600  | 2.14142100  |
| C  | -3.47337900 | 3.84568100  | 1.36131300  |
| H  | -3.80221800 | 4.56922100  | -0.64114800 |
| H  | -3.06157900 | 2.83956500  | 3.22614100  |
| H  | -3.77972300 | 4.77371600  | 1.83420900  |
| C  | 3.02001000  | 0.01892900  | -1.08788700 |
| C  | 3.33393500  | -1.08146900 | -1.90002000 |
| C  | 4.03050800  | 0.65122600  | -0.35233600 |
| C  | 4.65336100  | -1.52064200 | -1.99024300 |
| H  | 2.54364400  | -1.62577300 | -2.40568300 |
| C  | 5.34533200  | 0.19857400  | -0.44141300 |
| H  | 3.78965400  | 1.48075300  | 0.30223800  |
| C  | 5.66044200  | -0.88305500 | -1.26439600 |
| H  | 4.88955100  | -2.37512500 | -2.61713000 |
| H  | 6.12116500  | 0.68704100  | 0.14015100  |
| H  | 6.68560700  | -1.23544900 | -1.32994300 |
| C  | 1.29955400  | 2.26287500  | -0.37256500 |
| C  | 2.00532800  | 3.23848400  | -1.09401400 |
| C  | 0.52535300  | 2.64975100  | 0.72661600  |
| C  | 1.92455200  | 4.57864000  | -0.72220500 |
| H  | 2.62484000  | 2.94752900  | -1.93696300 |
| C  | 0.43553800  | 3.99304200  | 1.09198000  |
| H  | -0.01507900 | 1.88960100  | 1.27836200  |
| C  | 1.13422800  | 4.95794400  | 0.36716800  |
| H  | 2.47435400  | 5.32871500  | -1.28275600 |
| H  | -0.18662000 | 4.27949300  | 1.93371500  |
| H  | 1.06693900  | 6.00472800  | 0.64822900  |
| Pd | -0.03451200 | -0.85419400 | 0.50503800  |
| C  | 2.52429200  | -2.30279200 | 1.09148300  |
| C  | 1.75055900  | -1.21090300 | 1.48784000  |
| C  | 2.21191100  | -0.34720700 | 2.48285800  |
| C  | 3.46555100  | -0.56190500 | 3.06660900  |
| C  | 4.24885200  | -1.64272200 | 2.66260100  |

|    |             |             |             |
|----|-------------|-------------|-------------|
| C  | 3.77434300  | -2.51279300 | 1.67839200  |
| H  | 2.16388200  | -2.95633500 | 0.30266800  |
| H  | 3.82707900  | 0.11920300  | 3.83291400  |
| H  | 5.22521600  | -1.80584000 | 3.10999200  |
| H  | 4.38291200  | -3.35324800 | 1.35598300  |
| H  | 1.61564100  | 0.50572800  | 2.79447900  |
| C  | -0.86536100 | -1.77384600 | 1.99375400  |
| O  | -1.32890000 | -2.32631600 | 2.88229800  |
| Cl | 0.16579000  | -2.66698400 | -1.65624600 |

7<sub>a</sub>

|   |             |             |             |
|---|-------------|-------------|-------------|
| P | -1.85926500 | 0.11868300  | -0.60153400 |
| C | -1.62961900 | 0.43063200  | -2.41632100 |
| H | -1.55051800 | -0.57987300 | -2.83161600 |
| H | -2.56077200 | 0.86715700  | -2.79458800 |
| C | -0.42853900 | 1.27653700  | -2.88178500 |
| H | -0.58962700 | 1.48744800  | -3.94553000 |
| H | -0.42453900 | 2.24921200  | -2.37918200 |
| C | 0.96003900  | 0.62350400  | -2.75069100 |
| H | 1.69722800  | 1.19353800  | -3.32529400 |
| H | 0.93853700  | -0.40159900 | -3.13405900 |
| P | 1.49488900  | 0.47026100  | -0.98877100 |
| C | -3.41422400 | -0.82977600 | -0.57116800 |
| C | -4.64658700 | -0.24793500 | -0.24644200 |
| C | -3.34566700 | -2.19249200 | -0.90109500 |
| C | -5.80601300 | -1.02293700 | -0.26054500 |
| H | -4.70022300 | 0.80273800  | 0.01923200  |
| C | -4.51113600 | -2.95552500 | -0.92312300 |
| H | -2.38430700 | -2.64475400 | -1.13265400 |
| C | -5.73953700 | -2.37506200 | -0.60081000 |
| H | -6.75984900 | -0.57044300 | -0.00561400 |
| H | -4.45518400 | -4.00907100 | -1.17886800 |
| H | -6.64368400 | -2.97676700 | -0.60908500 |
| C | -2.25184100 | 1.71889300  | 0.18262700  |
| C | -2.46955100 | 2.90120400  | -0.53412300 |
| C | -2.29172600 | 1.75346700  | 1.58599100  |
| C | -2.70165600 | 4.10141400  | 0.14051800  |
| H | -2.45712000 | 2.89480500  | -1.61808400 |
| C | -2.54773800 | 2.94540100  | 2.25662700  |
| H | -2.10873500 | 0.83857100  | 2.14294200  |
| C | -2.74179000 | 4.12631400  | 1.53366500  |
| H | -2.85357600 | 5.01550100  | -0.42530100 |
| H | -2.58387600 | 2.95829000  | 3.34187600  |
| H | -2.92331500 | 5.06065700  | 2.05608500  |
| C | 3.23282200  | -0.09041300 | -1.02121200 |
| C | 3.49778100  | -1.38288100 | -1.50656600 |
| C | 4.27330800  | 0.66825300  | -0.46896500 |
| C | 4.79421000  | -1.89113000 | -1.45423600 |

|    |             |             |             |
|----|-------------|-------------|-------------|
| H  | 2.68167000  | -1.99483200 | -1.88353800 |
| C  | 5.56682500  | 0.14644500  | -0.41118300 |
| H  | 4.07413800  | 1.66023100  | -0.07810500 |
| C  | 5.83117700  | -1.13077900 | -0.90579100 |
| H  | 4.99179300  | -2.88934100 | -1.83380000 |
| H  | 6.36678200  | 0.74052000  | 0.02115100  |
| H  | 6.83839400  | -1.53456300 | -0.86056800 |
| C  | 1.53351000  | 2.19515500  | -0.38345000 |
| C  | 2.05071900  | 3.25547100  | -1.14348400 |
| C  | 0.96500900  | 2.46571900  | 0.86800100  |
| C  | 1.99126100  | 4.56183400  | -0.66091800 |
| H  | 2.50025900  | 3.06034400  | -2.11255500 |
| C  | 0.90617600  | 3.77262600  | 1.35118200  |
| H  | 0.54881900  | 1.64480600  | 1.44322500  |
| C  | 1.41527500  | 4.82148700  | 0.58561900  |
| H  | 2.39000700  | 5.37741800  | -1.25687600 |
| H  | 0.44464700  | 3.97032300  | 2.31290800  |
| H  | 1.36158200  | 5.84107200  | 0.95561400  |
| Pd | -0.01102800 | -1.01300200 | 0.14744800  |
| C  | 1.65987900  | -2.54099100 | 1.50211300  |
| C  | 0.49870200  | -2.13575900 | 2.20211100  |
| C  | 0.62141700  | -1.40323300 | 3.40371900  |
| C  | 1.87964700  | -1.10310900 | 3.90209100  |
| C  | 3.03160300  | -1.48174500 | 3.19194900  |
| C  | 2.92327900  | -2.19488500 | 2.00491200  |
| H  | 1.56304700  | -3.13280700 | 0.59680100  |
| H  | 1.97505500  | -0.56155900 | 4.83851800  |
| H  | 4.01148500  | -1.21447300 | 3.57563800  |
| H  | 3.81021700  | -2.47594300 | 1.44701600  |
| H  | -0.27765800 | -1.08760700 | 3.92417200  |
| C  | -0.83944300 | -2.19141600 | 1.51909200  |
| O  | -1.89225200 | -2.66089800 | 1.83224800  |
| Cl | 0.26969600  | -2.82962700 | -1.76386500 |

### TS1'

|   |             |            |             |
|---|-------------|------------|-------------|
| O | -2.44971200 | 1.97799900 | -0.57866500 |
| C | -3.05763000 | 2.98818300 | 0.26982900  |
| C | -2.34796800 | 2.72630900 | 1.64102600  |
| O | -1.04918600 | 2.22661900 | 1.21871400  |
| B | -1.21630700 | 1.65178700 | -0.03624300 |
| C | -4.56688600 | 2.77870100 | 0.26942700  |
| H | -4.96329000 | 2.99023900 | -0.72801100 |
| H | -4.82078900 | 1.74866700 | 0.52037800  |
| H | -5.05600100 | 3.45388300 | 0.97971900  |
| C | -2.70403300 | 4.35067000 | -0.33429400 |
| H | -3.04683600 | 4.37619700 | -1.37210500 |
| H | -3.18157600 | 5.17209300 | 0.20839800  |
| H | -1.62255300 | 4.51128200 | -0.32876300 |



|   |             |             |             |
|---|-------------|-------------|-------------|
| C | -2.13997800 | 3.95836400  | 2.51142700  |
| H | -3.10063800 | 4.41247400  | 2.77693900  |
| H | -1.63117700 | 3.67429900  | 3.43694300  |
| H | -1.52767100 | 4.70581700  | 2.00474900  |
| C | -3.01698600 | 1.60341100  | 2.43936700  |
| H | -2.35799600 | 1.30768200  | 3.26022000  |
| H | -3.97603700 | 1.91908300  | 2.86131600  |
| H | -3.18147600 | 0.73504400  | 1.79951300  |
| C | 6.73785600  | 2.12577800  | 0.12266300  |
| C | 5.44680600  | 2.29979100  | -0.37767600 |
| C | 4.95901500  | 1.50087700  | -1.42000800 |
| C | 5.79979300  | 0.50156900  | -1.93261800 |
| C | 7.08967800  | 0.31925700  | -1.43451000 |
| C | 7.56742800  | 1.13632600  | -0.40654400 |
| H | 7.09737400  | 2.76550400  | 0.92392000  |
| H | 4.80669100  | 3.07499700  | 0.03607700  |
| H | 5.43863100  | -0.12977600 | -2.74075100 |
| H | 7.72698900  | -0.45409800 | -1.85469400 |
| H | 8.57422900  | 1.00129500  | -0.02245800 |
| C | 3.55831800  | 1.67382600  | -1.94934200 |
| H | 3.17473800  | 2.66218100  | -1.67060100 |
| H | 3.56568600  | 1.63611400  | -3.04607100 |
| C | 2.57655200  | 0.58759100  | -1.43079000 |
| H | 2.61305400  | 0.59761300  | -0.33343000 |
| H | 2.97422700  | -0.39135500 | -1.72334800 |
| C | 1.15402600  | 0.74655200  | -1.91487300 |
| C | 0.31766500  | 1.80209800  | -1.28657300 |
| H | -0.31054800 | 2.36661500  | -1.97583700 |
| H | 0.83785200  | 2.45872900  | -0.58412300 |
| H | 1.01919700  | 0.64040200  | -2.99094600 |
| C | -0.72846200 | -1.71296100 | 0.07072000  |
| C | -1.74894700 | -3.66071500 | 0.67308900  |
| C | -0.48395500 | -3.69912600 | 1.16126900  |
| H | -2.55169600 | -4.37756400 | 0.72101000  |
| H | 0.04047500  | -4.45228800 | 1.72634400  |
| N | 0.12165900  | -2.50224800 | 0.78729800  |
| N | -1.88954300 | -2.43590300 | 0.01795700  |
| C | -3.11511400 | -1.88206200 | -0.47595100 |
| C | -4.13464000 | -1.58455400 | 0.44389200  |
| C | -3.23214800 | -1.57570300 | -1.83893100 |
| C | -5.29138900 | -0.96879400 | -0.03708600 |
| C | -4.40577400 | -0.94783500 | -2.26742500 |
| C | -5.43971100 | -0.63017000 | -1.38593900 |
| H | -6.08706600 | -0.72949600 | 0.66430500  |
| H | -4.50743100 | -0.69750900 | -3.32008700 |
| C | 1.45834500  | -2.08480700 | 1.10242500  |
| C | 1.65307900  | -1.19651600 | 2.16846400  |
| C | 2.50986100  | -2.51383700 | 0.28115500  |

|    |             |             |             |
|----|-------------|-------------|-------------|
| C  | 2.95987700  | -0.77014800 | 2.42495900  |
| C  | 3.79629500  | -2.06453600 | 0.58016000  |
| C  | 4.04139600  | -1.19629700 | 1.64923600  |
| H  | 3.13301900  | -0.07856400 | 3.24546200  |
| H  | 4.62221600  | -2.36707900 | -0.05770400 |
| Cu | -0.23763600 | -0.06052700 | -0.68491600 |
| C  | 2.23528500  | -3.35318300 | -0.93872100 |
| H  | 3.16747400  | -3.63822700 | -1.43167600 |
| H  | 1.68010100  | -4.26569800 | -0.69871300 |
| H  | 1.62775400  | -2.77868400 | -1.64807900 |
| C  | 0.49404900  | -0.67128300 | 2.97915600  |
| H  | -0.02997100 | 0.12415200  | 2.43682700  |
| H  | -0.23773100 | -1.45534200 | 3.19675200  |
| H  | 0.84661300  | -0.25726000 | 3.92730700  |
| C  | 5.44306400  | -0.73421800 | 1.95153500  |
| H  | 5.96540200  | -1.45882300 | 2.58911200  |
| H  | 6.02542100  | -0.61319300 | 1.03601600  |
| H  | 5.44136100  | 0.22590900  | 2.47353600  |
| C  | -2.13401100 | -1.89605400 | -2.81959100 |
| H  | -1.29872900 | -1.18977500 | -2.73125600 |
| H  | -1.71614900 | -2.89146400 | -2.64180000 |
| H  | -2.51157200 | -1.85299600 | -3.84414200 |
| C  | -3.99025800 | -1.88901100 | 1.91528400  |
| H  | -4.72967600 | -1.32986300 | 2.49325300  |
| H  | -4.13831100 | -2.95280500 | 2.13201700  |
| H  | -2.99547200 | -1.62149500 | 2.28205200  |
| C  | -6.67314600 | 0.09465300  | -1.86249400 |
| H  | -6.60034500 | 1.16641400  | -1.64202100 |
| H  | -6.80771800 | -0.01118900 | -2.94228700 |
| H  | -7.57479000 | -0.27854300 | -1.36693500 |

3'

|   |             |            |             |
|---|-------------|------------|-------------|
| O | -1.88911700 | 3.21821200 | -0.47876600 |
| C | -3.21245500 | 3.30488900 | 0.09705500  |
| C | -3.04881500 | 2.51292000 | 1.44628100  |
| O | -1.64049400 | 2.67742400 | 1.73313800  |
| B | -0.99537000 | 2.95003700 | 0.54088200  |
| C | -4.21536200 | 2.69977100 | -0.88059300 |
| H | -4.25272400 | 3.30590600 | -1.79032600 |
| H | -3.93805800 | 1.68260700 | -1.15939100 |
| H | -5.21914000 | 2.68231900 | -0.44167900 |
| C | -3.50772500 | 4.79385800 | 0.30614400  |
| H | -3.40310400 | 5.31133900 | -0.65108800 |
| H | -4.52174300 | 4.95970400 | 0.68225900  |
| H | -2.79740500 | 5.23659400 | 1.00947900  |
| C | -3.85634800 | 3.06073100 | 2.61798000  |
| H | -4.92963800 | 3.01697000 | 2.40470300  |
| H | -3.66216200 | 2.45784900 | 3.50968700  |

|   |             |             |             |
|---|-------------|-------------|-------------|
| H | -3.58626200 | 4.09346900  | 2.84361000  |
| C | -3.29759900 | 1.01222800  | 1.28893800  |
| H | -2.96949500 | 0.50240900  | 2.19922700  |
| H | -4.35340700 | 0.78612100  | 1.12402600  |
| H | -2.72186300 | 0.60559400  | 0.45418100  |
| C | 6.99028900  | 2.08071500  | -0.04872100 |
| C | 5.66209800  | 2.51079300  | -0.10119000 |
| C | 4.76499900  | 1.98445600  | -1.03984800 |
| C | 5.24029300  | 1.00106300  | -1.92145100 |
| C | 6.56248900  | 0.56235400  | -1.87036700 |
| C | 7.44630300  | 1.10247000  | -0.93266800 |
| H | 7.66799300  | 2.51083000  | 0.68362600  |
| H | 5.31352600  | 3.27294900  | 0.59118400  |
| H | 4.56057000  | 0.58134800  | -2.65898900 |
| H | 6.90800500  | -0.19515700 | -2.56896400 |
| H | 8.47836400  | 0.76660100  | -0.89470000 |
| C | 3.32015600  | 2.41437500  | -1.07721000 |
| H | 3.19383400  | 3.33478700  | -0.49808600 |
| H | 3.02571600  | 2.64614300  | -2.10948800 |
| C | 2.37056200  | 1.31805700  | -0.53409400 |
| H | 2.68923400  | 1.06587800  | 0.48700000  |
| H | 2.55144700  | 0.41036300  | -1.12368600 |
| C | 0.87383800  | 1.66911800  | -0.54533200 |
| C | 0.54984300  | 2.88857500  | 0.36035900  |
| H | 0.95127800  | 3.83110600  | -0.04791900 |
| H | 1.01263600  | 2.74643700  | 1.34643800  |
| H | 0.59495400  | 1.94288200  | -1.57545700 |
| C | -0.59283800 | -1.86208600 | 0.08807700  |
| C | -1.42008100 | -3.98228900 | -0.05228100 |
| C | -0.11988900 | -4.08048100 | 0.32641900  |
| H | -2.16733700 | -4.73523900 | -0.24205000 |
| H | 0.49938200  | -4.93615300 | 0.54146200  |
| N | 0.36298400  | -2.77944800 | 0.40642000  |
| N | -1.68999400 | -2.62161400 | -0.19050800 |
| C | -2.95604200 | -2.07744300 | -0.59078500 |
| C | -4.03120700 | -2.14690800 | 0.30546800  |
| C | -3.07216200 | -1.47591200 | -1.85327400 |
| C | -5.25485400 | -1.60539400 | -0.09625700 |
| C | -4.31242900 | -0.93454300 | -2.20114300 |
| C | -5.41177200 | -0.98629300 | -1.33882000 |
| H | -6.09634400 | -1.64622000 | 0.59043600  |
| H | -4.41963900 | -0.45903800 | -3.17252200 |
| C | 1.71482100  | -2.39580500 | 0.71835100  |
| C | 2.02437900  | -2.01974600 | 2.03051400  |
| C | 2.65442100  | -2.34235000 | -0.32047600 |
| C | 3.32990800  | -1.59672600 | 2.29296300  |
| C | 3.94550200  | -1.91494500 | -0.00946700 |
| C | 4.29938100  | -1.53116600 | 1.28796100  |

|    |             |             |             |
|----|-------------|-------------|-------------|
| H  | 3.58958300  | -1.29455100 | 3.30418000  |
| H  | 4.68193700  | -1.83549000 | -0.80357200 |
| Cu | -0.08601900 | 0.00957000  | -0.12586100 |
| C  | 2.25578900  | -2.65580900 | -1.73917300 |
| H  | 3.12286400  | -2.61816800 | -2.40205600 |
| H  | 1.79443900  | -3.64443300 | -1.83151900 |
| H  | 1.52151700  | -1.92305800 | -2.09434400 |
| C  | 0.96803500  | -2.01629100 | 3.10490900  |
| H  | 0.23742300  | -1.22102000 | 2.91703400  |
| H  | 0.41483500  | -2.96052400 | 3.13755500  |
| H  | 1.41355500  | -1.84354000 | 4.08711300  |
| C  | 5.67808400  | -0.99744700 | 1.57523500  |
| H  | 6.43766200  | -1.50368100 | 0.97342800  |
| H  | 5.73227800  | 0.06655300  | 1.32242700  |
| H  | 5.93939000  | -1.10929800 | 2.63142700  |
| C  | -1.90452700 | -1.38531000 | -2.80102600 |
| H  | -1.22022500 | -0.58477300 | -2.49481000 |
| H  | -1.32416800 | -2.31246200 | -2.81827900 |
| H  | -2.24907400 | -1.17056800 | -3.81533500 |
| C  | -3.86248400 | -2.73701400 | 1.68280600  |
| H  | -4.73485700 | -2.51888800 | 2.30257900  |
| H  | -3.73500400 | -3.82462800 | 1.65597200  |
| H  | -2.97752700 | -2.32296000 | 2.17613100  |
| C  | -6.72059800 | -0.34516500 | -1.72572200 |
| H  | -6.69081500 | 0.73451100  | -1.53606700 |
| H  | -6.93412600 | -0.48139900 | -2.79004000 |
| H  | -7.55496600 | -0.75887300 | -1.15295100 |

## 2''

|    |             |             |             |
|----|-------------|-------------|-------------|
| Cu | 0.91944700  | -0.95325800 | -0.21060100 |
| B  | -1.03161200 | -0.38985300 | 0.00338700  |
| C  | 4.13819000  | -1.08703300 | 1.15483200  |
| O  | -1.58551200 | 0.61430300  | -0.80305000 |
| O  | -1.96749600 | -0.80504400 | 0.94042200  |
| C  | 2.47026500  | 0.31900500  | -0.03313100 |
| N  | 3.68629500  | 0.16223200  | 0.56253600  |
| N  | 2.45553100  | 1.63089100  | -0.39796200 |
| C  | 4.40931900  | 1.34556200  | 0.57343400  |
| C  | 3.63073500  | 2.27333400  | -0.04214600 |
| C  | -3.25530000 | -0.22048100 | 0.61560900  |
| C  | 1.35040200  | 2.27023700  | -1.10629100 |
| H  | 5.39141000  | 1.42400200  | 1.01193900  |
| H  | 3.80921500  | 3.31509700  | -0.25627300 |
| H  | 1.18857300  | 3.26921900  | -0.69346100 |
| H  | 1.57997200  | 2.35520700  | -2.17251100 |
| H  | 0.44724300  | 1.67193000  | -0.97458500 |
| H  | 4.03341500  | -1.06255300 | 2.24356800  |
| H  | 3.52379900  | -1.89295400 | 0.75198600  |

|   |             |             |             |
|---|-------------|-------------|-------------|
| H | 5.18545500  | -1.26327000 | 0.89693500  |
| C | -2.84814100 | 1.03491900  | -0.22186900 |
| C | -2.54954400 | 2.26461900  | 0.64436900  |
| H | -2.07546200 | 3.02885000  | 0.02170000  |
| H | -3.45979800 | 2.69060000  | 1.07755700  |
| H | -1.86099600 | 2.00946200  | 1.45394700  |
| C | -3.80896500 | 1.40718800  | -1.34579000 |
| H | -4.79674300 | 1.66306900  | -0.94685100 |
| H | -3.42541900 | 2.27848100  | -1.88482300 |
| H | -3.92158400 | 0.59109600  | -2.06092600 |
| C | -3.99869000 | 0.08143500  | 1.91255400  |
| H | -4.94701800 | 0.59138100  | 1.71003000  |
| H | -4.22095600 | -0.85372900 | 2.43417100  |
| H | -3.40127000 | 0.70492700  | 2.57974100  |
| C | -4.02404800 | -1.26469100 | -0.20211400 |
| H | -3.50488300 | -1.48193800 | -1.13905200 |
| H | -4.08029200 | -2.19104300 | 0.37544100  |
| H | -5.04265800 | -0.93558300 | -0.43100500 |
| C | 0.97550900  | -2.82779800 | -0.68208600 |
| O | 0.57062600  | -3.86527500 | -0.97028100 |

**TS1''**

|    |             |             |             |
|----|-------------|-------------|-------------|
| Cu | 1.16393100  | -1.17168500 | -0.40129300 |
| B  | -1.09487300 | -0.60303200 | -0.05283200 |
| C  | 4.10394900  | -1.34308000 | 1.29160200  |
| O  | -1.56946400 | 0.37203200  | -0.91239300 |
| O  | -1.84555300 | -0.70029000 | 1.09302300  |
| C  | 2.56130000  | 0.06841600  | -0.04981600 |
| N  | 3.71979100  | -0.09595000 | 0.64723200  |
| N  | 2.59250300  | 1.37199400  | -0.44702000 |
| C  | 4.45840700  | 1.07721400  | 0.68279600  |
| C  | 3.74923400  | 2.00182500  | -0.01579300 |
| C  | -3.09124300 | 0.02388700  | 0.85341300  |
| C  | 1.55800200  | 1.99435400  | -1.26494200 |
| H  | 5.40375900  | 1.15084000  | 1.19590000  |
| H  | 3.96422300  | 3.03392100  | -0.24178200 |
| H  | 1.41191900  | 3.02690700  | -0.93969400 |
| H  | 1.84454500  | 1.98436100  | -2.32058000 |
| H  | 0.62476400  | 1.44236300  | -1.13937800 |
| H  | 3.89057400  | -1.30964600 | 2.36385200  |
| H  | 3.52833400  | -2.14956700 | 0.83376300  |
| H  | 5.17055600  | -1.52415600 | 1.13887700  |
| C  | -2.66099600 | 1.06687200  | -0.23547300 |
| C  | -2.06726800 | 2.34853600  | 0.35643900  |
| H  | -1.61261300 | 2.93335100  | -0.44831700 |
| H  | -2.83275800 | 2.96551700  | 0.83600800  |
| H  | -1.29328200 | 2.11453800  | 1.09219400  |
| C  | -3.73107800 | 1.40091800  | -1.26684700 |

|   |             |             |             |
|---|-------------|-------------|-------------|
| H | -4.60400800 | 1.85761400  | -0.78829000 |
| H | -3.33238800 | 2.11237700  | -1.99581100 |
| H | -4.05315500 | 0.50878500  | -1.80521500 |
| C | -3.56672400 | 0.62456500  | 2.16950200  |
| H | -4.46521000 | 1.23215700  | 2.01665400  |
| H | -3.81518000 | -0.17797700 | 2.86912900  |
| H | -2.79717400 | 1.24716700  | 2.62876800  |
| C | -4.09509500 | -1.00799300 | 0.33320100  |
| H | -3.72541500 | -1.48357800 | -0.57894900 |
| H | -4.21807900 | -1.78949400 | 1.08740700  |
| H | -5.07285200 | -0.55884100 | 0.13586300  |
| C | -0.32831700 | -2.18049200 | -0.82984900 |
| O | -1.31289200 | -2.79737300 | -1.12883400 |

### 3"

|    |             |             |             |
|----|-------------|-------------|-------------|
| Cu | 1.11774900  | -1.12004700 | -0.27060000 |
| B  | -1.72750300 | -1.00992400 | -0.41422400 |
| C  | 4.16321400  | -1.29843400 | 1.41449100  |
| O  | -1.74580700 | 0.25914000  | -0.97740000 |
| O  | -2.61452900 | -1.13062700 | 0.62934500  |
| C  | 2.66057300  | 0.07466200  | -0.00737700 |
| N  | 3.81727100  | -0.08342500 | 0.68884600  |
| N  | 2.74861200  | 1.33542600  | -0.51219000 |
| C  | 4.61237700  | 1.05109300  | 0.62100800  |
| C  | 3.93515700  | 1.94931500  | -0.14171600 |
| C  | -3.42663400 | 0.07211500  | 0.66087800  |
| C  | 1.72952500  | 1.94056100  | -1.36382700 |
| H  | 5.56873600  | 1.12151800  | 1.11442000  |
| H  | 4.18948400  | 2.95268300  | -0.44440800 |
| H  | 1.49007800  | 2.94230300  | -0.99814200 |
| H  | 2.08545400  | 2.00724000  | -2.39562300 |
| H  | 0.83270300  | 1.31995000  | -1.33066800 |
| H  | 4.31160400  | -1.07812700 | 2.47500400  |
| H  | 3.33846000  | -2.00237900 | 1.30370700  |
| H  | 5.07498500  | -1.74043500 | 1.00393500  |
| C  | -2.51477200 | 1.10971000  | -0.08602700 |
| C  | -1.50960600 | 1.79641600  | 0.84519500  |
| H  | -0.80970700 | 2.38243100  | 0.24360600  |
| H  | -2.00294400 | 2.47198300  | 1.54941000  |
| H  | -0.93504700 | 1.05655700  | 1.40982100  |
| C  | -3.26090900 | 2.14520000  | -0.91798900 |
| H  | -3.90111100 | 2.76671500  | -0.28331900 |
| H  | -2.54303100 | 2.80009500  | -1.42045300 |
| H  | -3.87844800 | 1.67207300  | -1.68239600 |
| C  | -3.73488400 | 0.41166500  | 2.11469100  |
| H  | -4.28254500 | 1.35739400  | 2.18680500  |
| H  | -4.35657200 | -0.37539800 | 2.54983700  |
| H  | -2.82277500 | 0.48725800  | 2.70880100  |

|   |             |             |             |
|---|-------------|-------------|-------------|
| C | -4.71850200 | -0.24581000 | -0.09786700 |
| H | -4.50906700 | -0.48090400 | -1.14459100 |
| H | -5.18688800 | -1.12193100 | 0.35745500  |
| H | -5.42680800 | 0.58719000  | -0.05908100 |
| C | -0.55630500 | -2.02868400 | -0.71619200 |
| O | -0.67095700 | -3.15677700 | -1.20366900 |

## 1A

|    |             |             |             |
|----|-------------|-------------|-------------|
| Cu | -0.03819600 | 0.97927000  | -0.18992200 |
| C  | 0.46107700  | -0.82382200 | 0.07143900  |
| N  | 1.67107600  | -1.43094100 | 0.21738900  |
| N  | -0.43613800 | -1.83733000 | 0.23014100  |
| C  | 1.53149700  | -2.79430800 | 0.46503300  |
| C  | 0.19782000  | -3.05111300 | 0.47295300  |
| C  | -2.50149300 | 2.82160500  | 1.07770700  |
| H  | -1.88140300 | 3.29915900  | 1.84338500  |
| H  | -3.52901000 | 3.19449300  | 1.17709800  |
| H  | -2.51087000 | 1.74211300  | 1.26625700  |
| C  | -1.90545700 | 3.10106300  | -0.31846500 |
| C  | -2.75229200 | 2.36784600  | -1.38078300 |
| H  | -2.31465100 | 2.52829600  | -2.37166800 |
| H  | -2.75522200 | 1.29088100  | -1.17851900 |
| H  | -3.79339700 | 2.71501700  | -1.39823700 |
| C  | -1.93694400 | 4.61594500  | -0.59461400 |
| H  | -1.33355100 | 5.13899400  | 0.15395200  |
| H  | -1.50303600 | 4.81836300  | -1.57883800 |
| H  | -2.95559300 | 5.02172800  | -0.57023600 |
| O  | -0.56903200 | 2.69085600  | -0.37485300 |
| H  | -0.35417100 | -3.96380400 | 0.62788400  |
| H  | 2.38425300  | -3.43641900 | 0.61366200  |
| C  | 2.92259700  | -0.73208600 | 0.13020500  |
| C  | 3.65823700  | -0.81840400 | -1.05874300 |
| C  | 3.34585400  | 0.03609600  | 1.22301900  |
| C  | 4.86899600  | -0.12554800 | -1.12681300 |
| C  | 4.56147200  | 0.71400400  | 1.10565200  |
| C  | 5.33753100  | 0.64113000  | -0.05530700 |
| H  | 5.45173600  | -0.17553100 | -2.04279000 |
| H  | 4.90552800  | 1.31934700  | 1.94014200  |
| C  | -1.85555500 | -1.61974000 | 0.16872900  |
| C  | -2.49957800 | -1.72082600 | -1.07020200 |
| C  | -2.52627200 | -1.23730300 | 1.33760400  |
| C  | -3.86968100 | -1.45304000 | -1.11326300 |
| C  | -3.89481300 | -0.97656100 | 1.24451000  |
| C  | -4.58194200 | -1.08130500 | 0.03101800  |
| H  | -4.38646000 | -1.51294800 | -2.06727700 |
| H  | -4.43119300 | -0.66431100 | 2.13642100  |
| C  | -1.77617100 | -1.05038100 | 2.63052900  |
| H  | -1.18602800 | -1.93483300 | 2.89155300  |

|   |             |             |             |
|---|-------------|-------------|-------------|
| H | -1.07788800 | -0.21015000 | 2.54397600  |
| H | -2.46381000 | -0.83909700 | 3.45207500  |
| C | -1.71973700 | -2.03420400 | -2.32015600 |
| H | -1.01910200 | -1.22037600 | -2.53940100 |
| H | -1.12809800 | -2.94937100 | -2.21563600 |
| H | -2.38706700 | -2.15113300 | -3.17665300 |
| C | -6.06262000 | -0.80364300 | -0.03967500 |
| H | -6.35451000 | -0.45747500 | -1.03485300 |
| H | -6.64432100 | -1.70774500 | 0.17863900  |
| H | -6.35800000 | -0.04113700 | 0.68641900  |
| C | 2.50066000  | 0.15803800  | 2.46457000  |
| H | 1.61455800  | 0.77147900  | 2.26529700  |
| H | 2.14424400  | -0.81777200 | 2.80928900  |
| H | 3.06565300  | 0.62612300  | 3.27369300  |
| C | 3.13561900  | -1.60139700 | -2.23636300 |
| H | 3.04330100  | -2.66927800 | -2.01055300 |
| H | 2.13933900  | -1.24947700 | -2.52448500 |
| H | 3.79913600  | -1.49459800 | -3.09713200 |
| C | 6.66115000  | 1.35961400  | -0.14146700 |
| H | 7.46756000  | 0.74967000  | 0.28400900  |
| H | 6.92872000  | 1.57949400  | -1.17856800 |
| H | 6.63900500  | 2.30255100  | 0.41226600  |

## 2A

|   |             |             |             |
|---|-------------|-------------|-------------|
| O | -3.46787000 | 1.12143100  | -0.68943700 |
| C | -4.21138700 | 2.35865800  | -0.80157400 |
| C | -3.22670300 | 3.39685300  | -0.16921800 |
| O | -1.93598400 | 2.78740200  | -0.42210400 |
| B | -2.10397100 | 1.40813700  | -0.59364400 |
| C | -5.54038700 | 2.19554800  | -0.07059400 |
| H | -6.13661400 | 1.42286500  | -0.56502600 |
| H | -5.39010600 | 1.89328800  | 0.96709000  |
| H | -6.11526400 | 3.12810200  | -0.08272400 |
| C | -4.46021700 | 2.59649400  | -2.29550500 |
| H | -4.97821100 | 1.72617700  | -2.70767700 |
| H | -5.07606400 | 3.48375300  | -2.47391400 |
| H | -3.51377800 | 2.71106200  | -2.82993500 |
| C | -3.24896700 | 4.78265600  | -0.80536900 |
| H | -4.23419800 | 5.24966200  | -0.69666700 |
| H | -2.51294700 | 5.42493100  | -0.31303700 |
| H | -2.99916700 | 4.73709200  | -1.86643400 |
| C | -3.37154600 | 3.51868100  | 1.35288800  |
| H | -2.52443600 | 4.09039800  | 1.74172500  |
| H | -4.29552100 | 4.03200800  | 1.63764500  |
| H | -3.35856500 | 2.53379900  | 1.82652800  |
| C | 6.52562600  | 1.04749400  | -1.43221700 |
| C | 5.28320500  | 0.86493200  | -2.03932000 |
| C | 4.69734800  | -0.40459200 | -2.11414700 |



|    |             |             |             |
|----|-------------|-------------|-------------|
| C  | 5.38894400  | -1.48871300 | -1.55790600 |
| C  | 6.62857600  | -1.31177300 | -0.94273000 |
| C  | 7.20218400  | -0.04010100 | -0.87722300 |
| H  | 6.96635200  | 2.03916600  | -1.39261200 |
| H  | 4.75882100  | 1.71642200  | -2.46553700 |
| H  | 4.94944100  | -2.48164800 | -1.61271200 |
| H  | 7.15110900  | -2.16684400 | -0.52314300 |
| H  | 8.17091600  | 0.09979600  | -0.40692200 |
| C  | 3.32622700  | -0.59152400 | -2.71537900 |
| H  | 3.14945300  | 0.14907100  | -3.50299500 |
| H  | 3.25443100  | -1.57973900 | -3.18545100 |
| C  | 2.21845100  | -0.46166500 | -1.64179700 |
| H  | 2.27917200  | 0.53742300  | -1.19508500 |
| H  | 2.44200800  | -1.16643900 | -0.83849000 |
| C  | 0.83385800  | -0.72011800 | -2.17395600 |
| C  | 0.00394100  | 0.26205100  | -2.66598600 |
| H  | -0.88253900 | 0.01820000  | -3.24183600 |
| H  | 0.31963100  | 1.30136600  | -2.69606300 |
| H  | 0.56227400  | -1.76186900 | -2.33838200 |
| C  | -0.18330600 | -1.02341100 | 0.99265400  |
| C  | -0.62021400 | -2.39487600 | 2.76766100  |
| C  | 0.49878500  | -1.68930000 | 3.06881300  |
| H  | -1.16626800 | -3.14081400 | 3.32203100  |
| H  | 1.13060200  | -1.69009600 | 3.94181300  |
| N  | 0.75141500  | -0.86055100 | 1.97577500  |
| N  | -1.01721100 | -1.97556300 | 1.50086300  |
| C  | -2.19155500 | -2.39945100 | 0.79281200  |
| C  | -3.39981600 | -1.73686600 | 1.04423300  |
| C  | -2.07132800 | -3.40739000 | -0.17121400 |
| C  | -4.51357900 | -2.11245200 | 0.29254300  |
| C  | -3.21399300 | -3.75141600 | -0.89760800 |
| C  | -4.43814900 | -3.10915500 | -0.68475300 |
| H  | -5.45514900 | -1.59692700 | 0.46007500  |
| H  | -3.14396800 | -4.53192500 | -1.65104700 |
| C  | 1.85620000  | 0.04883600  | 1.86826300  |
| C  | 1.61131800  | 1.42853000  | 1.94906800  |
| C  | 3.13990200  | -0.47044300 | 1.64685600  |
| C  | 2.69766300  | 2.28796700  | 1.76209400  |
| C  | 4.19305400  | 0.42942500  | 1.46666700  |
| C  | 3.98743300  | 1.81069600  | 1.51053100  |
| H  | 2.52736500  | 3.36029400  | 1.81944800  |
| H  | 5.18579600  | 0.04253800  | 1.25916800  |
| Cu | -0.61747800 | 0.02560500  | -0.63739200 |
| C  | 3.38827900  | -1.95706300 | 1.58191600  |
| H  | 4.33526600  | -2.15965900 | 1.07783200  |
| H  | 3.43692000  | -2.40336600 | 2.58238400  |
| H  | 2.59002600  | -2.47451700 | 1.04166000  |
| C  | 0.23741100  | 1.98067600  | 2.22728300  |

|   |             |             |             |
|---|-------------|-------------|-------------|
| H | -0.35776500 | 2.05640000  | 1.31121300  |
| H | -0.31870600 | 1.34153500  | 2.91899200  |
| H | 0.31271300  | 2.98025500  | 2.66391100  |
| C | 5.12583500  | 2.77294200  | 1.27965000  |
| H | 5.08774200  | 3.60997600  | 1.98416500  |
| H | 6.09370800  | 2.27687500  | 1.38172800  |
| H | 5.08075100  | 3.19348300  | 0.26861500  |
| C | -0.74516400 | -4.07993400 | -0.42010200 |
| H | 0.00365000  | -3.35132000 | -0.74659600 |
| H | -0.35546200 | -4.54930300 | 0.48992000  |
| H | -0.83754400 | -4.85064700 | -1.18890400 |
| C | -3.47198000 | -0.63731500 | 2.06880900  |
| H | -4.47901900 | -0.21869000 | 2.11511800  |
| H | -3.19829800 | -0.99512100 | 3.06750300  |
| H | -2.78045400 | 0.16525700  | 1.79865100  |
| C | -5.64718400 | -3.45764900 | -1.51736800 |
| H | -5.75790800 | -2.75688800 | -2.35360000 |
| H | -5.56742100 | -4.46348200 | -1.93934400 |
| H | -6.56723900 | -3.40637300 | -0.92727100 |

#### TS1A

|   |             |            |             |
|---|-------------|------------|-------------|
| O | -2.44971200 | 1.97799900 | -0.57866500 |
| C | -3.05763000 | 2.98818300 | 0.26982900  |
| C | -2.34796800 | 2.72630900 | 1.64102600  |
| O | -1.04918600 | 2.22661900 | 1.21871400  |
| B | -1.21630700 | 1.65178700 | -0.03624300 |
| C | -4.56688600 | 2.77870100 | 0.26942700  |
| H | -4.96329000 | 2.99023900 | -0.72801100 |
| H | -4.82078900 | 1.74866700 | 0.52037800  |
| H | -5.05600100 | 3.45388300 | 0.97971900  |
| C | -2.70403300 | 4.35067000 | -0.33429400 |
| H | -3.04683600 | 4.37619700 | -1.37210500 |
| H | -3.18157600 | 5.17209300 | 0.20839800  |
| H | -1.62255300 | 4.51128200 | -0.32876300 |
| C | -2.13997800 | 3.95836400 | 2.51142700  |
| H | -3.10063800 | 4.41247400 | 2.77693900  |
| H | -1.63117700 | 3.67429900 | 3.43694300  |
| H | -1.52767100 | 4.70581700 | 2.00474900  |
| C | -3.01698600 | 1.60341100 | 2.43936700  |
| H | -2.35799600 | 1.30768200 | 3.26022000  |
| H | -3.97603700 | 1.91908300 | 2.86131600  |
| H | -3.18147600 | 0.73504400 | 1.79951300  |
| C | 6.73785600  | 2.12577800 | 0.12266300  |
| C | 5.44680600  | 2.29979100 | -0.37767600 |
| C | 4.95901500  | 1.50087700 | -1.42000800 |
| C | 5.79979300  | 0.50156900 | -1.93261800 |
| C | 7.08967800  | 0.31925700 | -1.43451000 |
| C | 7.56742800  | 1.13632600 | -0.40654400 |

|    |             |             |             |
|----|-------------|-------------|-------------|
| H  | 7.09737400  | 2.76550400  | 0.92392000  |
| H  | 4.80669100  | 3.07499700  | 0.03607700  |
| H  | 5.43863100  | -0.12977600 | -2.74075100 |
| H  | 7.72698900  | -0.45409800 | -1.85469400 |
| H  | 8.57422900  | 1.00129500  | -0.02245800 |
| C  | 3.55831800  | 1.67382600  | -1.94934200 |
| H  | 3.17473800  | 2.66218100  | -1.67060100 |
| H  | 3.56568600  | 1.63611400  | -3.04607100 |
| C  | 2.57655200  | 0.58759100  | -1.43079000 |
| H  | 2.61305400  | 0.59761300  | -0.33343000 |
| H  | 2.97422700  | -0.39135500 | -1.72334800 |
| C  | 1.15402600  | 0.74655200  | -1.91487300 |
| C  | 0.31766500  | 1.80209800  | -1.28657300 |
| H  | -0.31054800 | 2.36661500  | -1.97583700 |
| H  | 0.83785200  | 2.45872900  | -0.58412300 |
| H  | 1.01919700  | 0.64040200  | -2.99094600 |
| C  | -0.72846200 | -1.71296100 | 0.07072000  |
| C  | -1.74894700 | -3.66071500 | 0.67308900  |
| C  | -0.48395500 | -3.69912600 | 1.16126900  |
| H  | -2.55169600 | -4.37756400 | 0.72101000  |
| H  | 0.04047500  | -4.45228800 | 1.72634400  |
| N  | 0.12165900  | -2.50224800 | 0.78729800  |
| N  | -1.88954300 | -2.43590300 | 0.01795700  |
| C  | -3.11511400 | -1.88206200 | -0.47595100 |
| C  | -4.13464000 | -1.58455400 | 0.44389200  |
| C  | -3.23214800 | -1.57570300 | -1.83893100 |
| C  | -5.29138900 | -0.96879400 | -0.03708600 |
| C  | -4.40577400 | -0.94783500 | -2.26742500 |
| C  | -5.43971100 | -0.63017000 | -1.38593900 |
| H  | -6.08706600 | -0.72949600 | 0.66430500  |
| H  | -4.50743100 | -0.69750900 | -3.32008700 |
| C  | 1.45834500  | -2.08480700 | 1.10242500  |
| C  | 1.65307900  | -1.19651600 | 2.16846400  |
| C  | 2.50986100  | -2.51383700 | 0.28115500  |
| C  | 2.95987700  | -0.77014800 | 2.42495900  |
| C  | 3.79629500  | -2.06453600 | 0.58016000  |
| C  | 4.04139600  | -1.19629700 | 1.64923600  |
| H  | 3.13301900  | -0.07856400 | 3.24546200  |
| H  | 4.62221600  | -2.36707900 | -0.05770400 |
| Cu | -0.23763600 | -0.06052700 | -0.68491600 |
| C  | 2.23528500  | -3.35318300 | -0.93872100 |
| H  | 3.16747400  | -3.63822700 | -1.43167600 |
| H  | 1.68010100  | -4.26569800 | -0.69871300 |
| H  | 1.62775400  | -2.77868400 | -1.64807900 |
| C  | 0.49404900  | -0.67128300 | 2.97915600  |
| H  | -0.02997100 | 0.12415200  | 2.43682700  |
| H  | -0.23773100 | -1.45534200 | 3.19675200  |
| H  | 0.84661300  | -0.25726000 | 3.92730700  |

|   |             |             |             |
|---|-------------|-------------|-------------|
| C | 5.44306400  | -0.73421800 | 1.95153500  |
| H | 5.96540200  | -1.45882300 | 2.58911200  |
| H | 6.02542100  | -0.61319300 | 1.03601600  |
| H | 5.44136100  | 0.22590900  | 2.47353600  |
| C | -2.13401100 | -1.89605400 | -2.81959100 |
| H | -1.29872900 | -1.18977500 | -2.73125600 |
| H | -1.71614900 | -2.89146400 | -2.64180000 |
| H | -2.51157200 | -1.85299600 | -3.84414200 |
| C | -3.99025800 | -1.88901100 | 1.91528400  |
| H | -4.72967600 | -1.32986300 | 2.49325300  |
| H | -4.13831100 | -2.95280500 | 2.13201700  |
| H | -2.99547200 | -1.62149500 | 2.28205200  |
| C | -6.67314600 | 0.09465300  | -1.86249400 |
| H | -6.60034500 | 1.16641400  | -1.64202100 |
| H | -6.80771800 | -0.01118900 | -2.94228700 |
| H | -7.57479000 | -0.27854300 | -1.36693500 |

### 3A

|   |             |            |             |
|---|-------------|------------|-------------|
| O | -1.88911700 | 3.21821200 | -0.47876600 |
| C | -3.21245500 | 3.30488900 | 0.09705500  |
| C | -3.04881500 | 2.51292000 | 1.44628100  |
| O | -1.64049400 | 2.67742400 | 1.73313800  |
| B | -0.99537000 | 2.95003700 | 0.54088200  |
| C | -4.21536200 | 2.69977100 | -0.88059300 |
| H | -4.25272400 | 3.30590600 | -1.79032600 |
| H | -3.93805800 | 1.68260700 | -1.15939100 |
| H | -5.21914000 | 2.68231900 | -0.44167900 |
| C | -3.50772500 | 4.79385800 | 0.30614400  |
| H | -3.40310400 | 5.31133900 | -0.65108800 |
| H | -4.52174300 | 4.95970400 | 0.68225900  |
| H | -2.79740500 | 5.23659400 | 1.00947900  |
| C | -3.85634800 | 3.06073100 | 2.61798000  |
| H | -4.92963800 | 3.01697000 | 2.40470300  |
| H | -3.66216200 | 2.45784900 | 3.50968700  |
| H | -3.58626200 | 4.09346900 | 2.84361000  |
| C | -3.29759900 | 1.01222800 | 1.28893800  |
| H | -2.96949500 | 0.50240900 | 2.19922700  |
| H | -4.35340700 | 0.78612100 | 1.12402600  |
| H | -2.72186300 | 0.60559400 | 0.45418100  |
| C | 6.99028900  | 2.08071500 | -0.04872100 |
| C | 5.66209800  | 2.51079300 | -0.10119000 |
| C | 4.76499900  | 1.98445600 | -1.03984800 |
| C | 5.24029300  | 1.00106300 | -1.92145100 |
| C | 6.56248900  | 0.56235400 | -1.87036700 |
| C | 7.44630300  | 1.10247000 | -0.93266800 |
| H | 7.66799300  | 2.51083000 | 0.68362600  |
| H | 5.31352600  | 3.27294900 | 0.59118400  |
| H | 4.56057000  | 0.58134800 | -2.65898900 |

|    |             |             |             |
|----|-------------|-------------|-------------|
| H  | 6.90800500  | -0.19515700 | -2.56896400 |
| H  | 8.47836400  | 0.76660100  | -0.89470000 |
| C  | 3.32015600  | 2.41437500  | -1.07721000 |
| H  | 3.19383400  | 3.33478700  | -0.49808600 |
| H  | 3.02571600  | 2.64614300  | -2.10948800 |
| C  | 2.37056200  | 1.31805700  | -0.53409400 |
| H  | 2.68923400  | 1.06587800  | 0.48700000  |
| H  | 2.55144700  | 0.41036300  | -1.12368600 |
| C  | 0.87383800  | 1.66911800  | -0.54533200 |
| C  | 0.54984300  | 2.88857500  | 0.36035900  |
| H  | 0.95127800  | 3.83110600  | -0.04791900 |
| H  | 1.01263600  | 2.74643700  | 1.34643800  |
| H  | 0.59495400  | 1.94288200  | -1.57545700 |
| C  | -0.59283800 | -1.86208600 | 0.08807700  |
| C  | -1.42008100 | -3.98228900 | -0.05228100 |
| C  | -0.11988900 | -4.08048100 | 0.32641900  |
| H  | -2.16733700 | -4.73523900 | -0.24205000 |
| H  | 0.49938200  | -4.93615300 | 0.54146200  |
| N  | 0.36298400  | -2.77944800 | 0.40642000  |
| N  | -1.68999400 | -2.62161400 | -0.19050800 |
| C  | -2.95604200 | -2.07744300 | -0.59078500 |
| C  | -4.03120700 | -2.14690800 | 0.30546800  |
| C  | -3.07216200 | -1.47591200 | -1.85327400 |
| C  | -5.25485400 | -1.60539400 | -0.09625700 |
| C  | -4.31242900 | -0.93454300 | -2.20114300 |
| C  | -5.41177200 | -0.98629300 | -1.33882000 |
| H  | -6.09634400 | -1.64622000 | 0.59043600  |
| H  | -4.41963900 | -0.45903800 | -3.17252200 |
| C  | 1.71482100  | -2.39580500 | 0.71835100  |
| C  | 2.02437900  | -2.01974600 | 2.03051400  |
| C  | 2.65442100  | -2.34235000 | -0.32047600 |
| C  | 3.32990800  | -1.59672600 | 2.29296300  |
| C  | 3.94550200  | -1.91494500 | -0.00946700 |
| C  | 4.29938100  | -1.53116600 | 1.28796100  |
| H  | 3.58958300  | -1.29455100 | 3.30418000  |
| H  | 4.68193700  | -1.83549000 | -0.80357200 |
| Cu | -0.08601900 | 0.00957000  | -0.12586100 |
| C  | 2.25578900  | -2.65580900 | -1.73917300 |
| H  | 3.12286400  | -2.61816800 | -2.40205600 |
| H  | 1.79443900  | -3.64443300 | -1.83151900 |
| H  | 1.52151700  | -1.92305800 | -2.09434400 |
| C  | 0.96803500  | -2.01629100 | 3.10490900  |
| H  | 0.23742300  | -1.22102000 | 2.91703400  |
| H  | 0.41483500  | -2.96052400 | 3.13755500  |
| H  | 1.41355500  | -1.84354000 | 4.08711300  |
| C  | 5.67808400  | -0.99744700 | 1.57523500  |
| H  | 6.43766200  | -1.50368100 | 0.97342800  |
| H  | 5.73227800  | 0.06655300  | 1.32242700  |

|   |             |             |             |
|---|-------------|-------------|-------------|
| H | 5.93939000  | -1.10929800 | 2.63142700  |
| C | -1.90452700 | -1.38531000 | -2.80102600 |
| H | -1.22022500 | -0.58477300 | -2.49481000 |
| H | -1.32416800 | -2.31246200 | -2.81827900 |
| H | -2.24907400 | -1.17056800 | -3.81533500 |
| C | -3.86248400 | -2.73701400 | 1.68280600  |
| H | -4.73485700 | -2.51888800 | 2.30257900  |
| H | -3.73500400 | -3.82462800 | 1.65597200  |
| H | -2.97752700 | -2.32296000 | 2.17613100  |
| C | -6.72059800 | -0.34516500 | -1.72572200 |
| H | -6.69081500 | 0.73451100  | -1.53606700 |
| H | -6.93412600 | -0.48139900 | -2.79004000 |
| H | -7.55496600 | -0.75887300 | -1.15295100 |

## TS2A

|    |             |             |             |
|----|-------------|-------------|-------------|
| Cu | 0.75897100  | -0.61833900 | -0.28272200 |
| B  | -3.45583300 | -0.86241100 | 0.90191900  |
| C  | -1.05315500 | -1.41075900 | 1.47359100  |
| O  | -4.23791600 | 0.02541400  | 0.19063800  |
| O  | -3.88891700 | -2.15835300 | 0.76769500  |
| C  | 1.69313000  | 1.03559400  | -0.64301800 |
| N  | 1.13977000  | 2.26916100  | -0.79642200 |
| N  | 3.00128100  | 1.21843400  | -0.97893200 |
| C  | 2.07779400  | 3.20299000  | -1.22647800 |
| C  | 3.25522900  | 2.53830900  | -1.34247800 |
| C  | -5.11248000 | -0.74768300 | -0.67272100 |
| C  | -5.14388300 | -2.14762000 | 0.04586400  |
| H  | 1.81615500  | 4.23247800  | -1.40862800 |
| H  | 4.23427400  | 2.86786500  | -1.64883100 |
| C  | 0.25662600  | -1.19808700 | 2.02348200  |
| C  | 0.60857600  | -0.05537000 | 2.80821700  |
| C  | 1.90868600  | 0.15593900  | 3.23768000  |
| C  | 2.94603700  | -0.72914600 | 2.89501400  |
| C  | 1.32999200  | -2.10123300 | 1.70841800  |
| C  | 2.63992100  | -1.85129600 | 2.12755500  |
| H  | -0.17188000 | 0.64566300  | 3.08488800  |
| H  | 3.42505600  | -2.55185900 | 1.85541300  |
| H  | -1.33274600 | -2.45551300 | 1.36077900  |
| H  | 2.12650200  | 1.02075500  | 3.86129700  |
| H  | 3.96067200  | -0.55211900 | 3.23451000  |
| H  | 1.09994000  | -3.02631900 | 1.18641100  |
| C  | -4.44531000 | -0.79226200 | -2.05135600 |
| H  | -5.06722000 | -1.31946900 | -2.78058800 |
| H  | -4.29565500 | 0.23116300  | -2.40523200 |
| H  | -3.47111700 | -1.28179900 | -2.00139400 |
| C  | -6.45827600 | -0.03658300 | -0.76331700 |
| H  | -6.32867300 | 0.93279300  | -1.25309000 |
| H  | -7.16777800 | -0.62312700 | -1.35584500 |

|   |             |             |             |
|---|-------------|-------------|-------------|
| H | -6.88930800 | 0.13860000  | 0.22384300  |
| C | -5.16870800 | -3.34880800 | -0.89286500 |
| H | -5.18740200 | -4.27088000 | -0.30552100 |
| H | -6.06093700 | -3.33079000 | -1.52761900 |
| H | -4.28051000 | -3.37004500 | -1.52518200 |
| C | -6.25502800 | -2.26204900 | 1.09362200  |
| H | -7.24424700 | -2.32471900 | 0.63080000  |
| H | -6.08966400 | -3.16692500 | 1.68376600  |
| H | -6.24112000 | -1.40685300 | 1.77483100  |
| C | -2.20497300 | -0.46804000 | 1.75675400  |
| H | -2.49460900 | -0.48466300 | 2.82731100  |
| H | -1.93237400 | 0.57130000  | 1.54219500  |
| C | -0.59782700 | -1.83443800 | -0.82930400 |
| O | -1.42791000 | -2.49362800 | -1.31289800 |
| C | 3.99278300  | 0.18592400  | -0.86206100 |
| C | 4.90381600  | 0.25715800  | 0.20223500  |
| C | 3.99708400  | -0.86870700 | -1.78435900 |
| C | 5.82649900  | -0.78117100 | 0.33858300  |
| C | 4.93699900  | -1.88688000 | -1.60046800 |
| C | 5.84991600  | -1.86660500 | -0.54280400 |
| H | 6.53521400  | -0.74674300 | 1.16187200  |
| H | 4.95441400  | -2.71445100 | -2.30492800 |
| C | -0.22748200 | 2.56251800  | -0.46473200 |
| C | -1.23894700 | 2.23665600  | -1.37935600 |
| C | -0.49835500 | 3.14143500  | 0.78128100  |
| C | -2.55573000 | 2.51206900  | -1.01233800 |
| C | -1.83472700 | 3.39944000  | 1.10086300  |
| C | -2.87465500 | 3.08604800  | 0.22253400  |
| H | -3.35579400 | 2.25700100  | -1.69965500 |
| H | -2.06672100 | 3.83909400  | 2.06723400  |
| C | 0.61104400  | 3.44149100  | 1.75622100  |
| H | 1.16823600  | 2.53024900  | 1.99397100  |
| H | 1.32613500  | 4.16727800  | 1.35427500  |
| H | 0.20599400  | 3.84644000  | 2.68643000  |
| C | -0.91702300 | 1.58551000  | -2.69968600 |
| H | -0.11795000 | 2.11568800  | -3.22802200 |
| H | -0.57409100 | 0.55611800  | -2.54995400 |
| H | -1.79953300 | 1.55992100  | -3.34286800 |
| C | -4.31402900 | 3.30558200  | 0.60747100  |
| H | -4.40151700 | 3.92834100  | 1.50181600  |
| H | -4.87441800 | 3.78746400  | -0.20084300 |
| H | -4.78593300 | 2.33791400  | 0.80496000  |
| C | 3.02163800  | -0.91877500 | -2.93214300 |
| H | 2.02617800  | -1.21965800 | -2.58463600 |
| H | 2.91025400  | 0.06000900  | -3.40844400 |
| H | 3.35261700  | -1.63678600 | -3.68621500 |
| C | 6.82309500  | -3.00147400 | -0.33998400 |
| H | 7.76070200  | -2.65047900 | 0.10080500  |

|   |            |             |             |
|---|------------|-------------|-------------|
| H | 6.40626700 | -3.75594200 | 0.33813500  |
| H | 7.05508300 | -3.50339700 | -1.28354200 |
| C | 4.88163000 | 1.40865800  | 1.17460900  |
| H | 5.20517400 | 2.34451600  | 0.70579600  |
| H | 3.87438900 | 1.56435400  | 1.56897300  |
| H | 5.54807600 | 1.21076000  | 2.01692000  |

#### 4A

|    |             |             |             |
|----|-------------|-------------|-------------|
| Cu | 0.81149000  | -0.52720900 | 0.14002400  |
| B  | -3.63060300 | -0.65103800 | 0.91265100  |
| C  | -1.44537300 | -0.15129400 | 2.12078100  |
| O  | -4.37909700 | -0.15775100 | -0.17518900 |
| O  | -4.18042300 | -1.85765700 | 1.37312900  |
| C  | 2.09260500  | 0.31941500  | -1.04468700 |
| N  | 1.62702400  | 1.29151000  | -1.87797100 |
| N  | 3.39396300  | 0.17255800  | -1.39741300 |
| C  | 2.61982700  | 1.74241700  | -2.73740200 |
| C  | 3.74114700  | 1.03472100  | -2.43524900 |
| C  | -5.18214700 | -1.24466300 | -0.67394100 |
| C  | -5.36723100 | -2.13609600 | 0.61136900  |
| H  | 2.43654200  | 2.50804300  | -3.47351500 |
| H  | 4.73598900  | 1.05827900  | -2.84939200 |
| C  | -0.37893100 | 0.80780600  | 2.59645600  |
| C  | -0.50831500 | 2.19840200  | 2.51332000  |
| C  | 0.55136700  | 3.04034100  | 2.85728300  |
| C  | 1.77029400  | 2.50922400  | 3.28092600  |
| C  | 0.85235800  | 0.28600700  | 3.03245800  |
| C  | 1.91585300  | 1.12295700  | 3.37117000  |
| H  | -1.44329900 | 2.62824000  | 2.17487800  |
| H  | 2.85325800  | 0.69246300  | 3.71229100  |
| H  | -1.48680100 | -0.99222200 | 2.83168900  |
| H  | 0.42325200  | 4.11709600  | 2.79011200  |
| H  | 2.59263300  | 3.16638000  | 3.54856100  |
| H  | 0.96712400  | -0.79135800 | 3.11776000  |
| C  | -4.39533000 | -1.95258100 | -1.78596700 |
| H  | -4.97439100 | -2.76707300 | -2.23191400 |
| H  | -4.16870100 | -1.22755500 | -2.57384700 |
| H  | -3.45069600 | -2.34520800 | -1.40796800 |
| C  | -6.47373200 | -0.66618600 | -1.24578500 |
| H  | -6.24313900 | -0.04589000 | -2.11744500 |
| H  | -7.15247200 | -1.46314100 | -1.56787100 |
| H  | -6.98917100 | -0.04158800 | -0.51446200 |
| C  | -5.43955500 | -3.63690300 | 0.34223800  |
| H  | -5.54873800 | -4.17331000 | 1.28933800  |
| H  | -6.29929400 | -3.88405800 | -0.29025100 |
| H  | -4.53026900 | -3.99354300 | -0.14402700 |



|   |             |             |             |
|---|-------------|-------------|-------------|
| C | -6.56282600 | -1.69865500 | 1.46779200  |
| H | -7.52024800 | -1.94144700 | 0.99609800  |
| H | -6.50986500 | -2.21391100 | 2.43071400  |
| H | -6.52811400 | -0.62258700 | 1.65796100  |
| C | -2.86572300 | 0.36747100  | 1.87276300  |
| H | -3.40677400 | 0.51671700  | 2.81312800  |
| H | -2.82123600 | 1.33445600  | 1.36107300  |
| C | -0.98485300 | -0.82474200 | 0.79693000  |
| O | -1.93468600 | -1.23232200 | 0.10204200  |
| C | 4.28462900  | -0.73190200 | -0.72632300 |
| C | 4.98883100  | -0.26807100 | 0.39227100  |
| C | 4.38530000  | -2.04953200 | -1.18916300 |
| C | 5.83600400  | -1.16869300 | 1.04278800  |
| C | 5.24456400  | -2.91312000 | -0.50562900 |
| C | 5.97533100  | -2.49146700 | 0.61017500  |
| H | 6.39573800  | -0.82914100 | 1.91040200  |
| H | 5.34041600  | -3.93950100 | -0.84999700 |
| C | 0.28178600  | 1.79872200  | -1.75514900 |
| C | -0.79216700 | 1.02628400  | -2.22058200 |
| C | 0.09356800  | 2.99099200  | -1.03914600 |
| C | -2.08425800 | 1.47769300  | -1.94092100 |
| C | -1.21743000 | 3.40620800  | -0.79996400 |
| C | -2.31785800 | 2.65647500  | -1.23016400 |
| H | -2.92886300 | 0.86197600  | -2.22918900 |
| H | -1.38186200 | 4.32001200  | -0.23491200 |
| C | 1.26543200  | 3.75436700  | -0.47735700 |
| H | 1.79723500  | 3.15074300  | 0.26584500  |
| H | 1.98743100  | 4.03698700  | -1.25029200 |
| H | 0.92592900  | 4.66616200  | 0.01831300  |
| C | -0.60471100 | -0.29791400 | -2.91554800 |
| H | 0.39562200  | -0.41185700 | -3.33816700 |
| H | -0.77634400 | -1.10872300 | -2.19849900 |
| H | -1.33709000 | -0.41277400 | -3.71966200 |
| C | -3.73170000 | 3.08177200  | -0.92491700 |
| H | -3.75939700 | 3.84063500  | -0.13764100 |
| H | -4.21378600 | 3.50844500  | -1.81316100 |
| H | -4.32051700 | 2.21606300  | -0.60791100 |
| C | 3.56707900  | -2.51833000 | -2.36497700 |
| H | 2.49679000  | -2.46904800 | -2.13594000 |
| H | 3.73222600  | -1.89319400 | -3.24866300 |
| H | 3.81446400  | -3.54990700 | -2.62439100 |
| C | 6.87082600  | -3.45326100 | 1.35129100  |
| H | 7.69786200  | -2.93215800 | 1.84162300  |
| H | 6.31207700  | -3.98632200 | 2.12994500  |
| H | 7.29151800  | -4.20639600 | 0.67896900  |
| C | 4.80793700  | 1.14293000  | 0.89084700  |
| H | 4.96104400  | 1.87793500  | 0.09415600  |
| H | 3.79304900  | 1.29274600  | 1.27502900  |

|   |            |            |            |
|---|------------|------------|------------|
| H | 5.51182200 | 1.36140200 | 1.69718400 |
|---|------------|------------|------------|

**TS3A**

|    |             |             |             |
|----|-------------|-------------|-------------|
| Cu | 1.10282400  | -0.26563800 | -0.78624600 |
| B  | -2.86964400 | -0.25095900 | -0.41337400 |
| C  | -1.03474500 | 1.57491000  | -0.18469400 |
| O  | -2.86973900 | -0.33954500 | -1.78992000 |
| O  | -4.06589800 | -0.73038800 | 0.12089200  |
| C  | 2.26964700  | -1.55938200 | 0.08913600  |
| N  | 3.62743500  | -1.54005000 | 0.19892000  |
| N  | 1.88772400  | -2.51628600 | 0.98205900  |
| C  | 4.08423900  | -2.45914600 | 1.13960300  |
| C  | 2.98070100  | -3.07778600 | 1.63471500  |
| C  | -4.03043700 | -1.08104900 | -2.19841500 |
| C  | -4.99533600 | -0.89347400 | -0.97496800 |
| C  | -1.94374600 | 2.72880100  | -0.31312600 |
| C  | -3.23044200 | 2.74216200  | 0.28300800  |
| C  | -4.07739500 | 3.84902000  | 0.20081400  |
| C  | -3.68111200 | 5.00068700  | -0.47844000 |
| C  | -1.56261500 | 3.91695500  | -0.99186900 |
| C  | -2.41268800 | 5.01491300  | -1.07123400 |
| H  | -3.57530600 | 1.87305000  | 0.83238600  |
| H  | -2.07985400 | 5.90182700  | -1.60845500 |
| H  | -5.05472200 | 3.80596600  | 0.67933900  |
| H  | -4.33755700 | 5.86539200  | -0.54202700 |
| H  | -0.59893600 | 3.92263000  | -1.48240500 |
| C  | -3.58197900 | -2.53568600 | -2.39058300 |
| H  | -4.39048900 | -3.17036200 | -2.76858300 |
| H  | -2.75810200 | -2.55156800 | -3.10903100 |
| H  | -3.21269100 | -2.95068100 | -1.44928300 |
| C  | -4.54106700 | -0.50392300 | -3.51464600 |
| H  | -3.79456500 | -0.66665000 | -4.29709400 |
| H  | -5.47426300 | -0.99053700 | -3.82069200 |
| H  | -4.70998400 | 0.57056200  | -3.43213600 |
| C  | -5.90469300 | -2.08359800 | -0.68681300 |
| H  | -6.51275300 | -1.87666200 | 0.19913300  |
| H  | -6.58197500 | -2.26536900 | -1.52864900 |
| H  | -5.33013500 | -2.99186400 | -0.49894500 |
| C  | -5.81973100 | 0.39693300  | -1.05428500 |
| H  | -6.58651900 | 0.34144000  | -1.83378200 |
| H  | -6.31492800 | 0.55507800  | -0.09173600 |
| H  | -5.17772100 | 1.26096600  | -1.24176300 |
| C  | -1.67418500 | 0.30686700  | 0.41023400  |
| H  | -0.89827900 | -0.47328900 | 0.40280300  |
| H  | -1.94148100 | 0.43693600  | 1.46604400  |
| C  | 0.00835800  | 1.28742500  | -1.22888800 |
| O  | 0.32637000  | 2.10627100  | -2.11068200 |
| C  | 0.81153500  | 4.15099200  | 1.95168900  |

|   |             |             |             |
|---|-------------|-------------|-------------|
| H | 0.09411300  | 4.27805800  | 1.13619500  |
| H | 0.71551800  | 5.00743800  | 2.63326700  |
| H | 1.81851300  | 4.16045200  | 1.51994100  |
| C | 0.56978600  | 2.80472800  | 2.66777200  |
| C | 1.58979800  | 2.64749700  | 3.81364700  |
| H | 1.43776400  | 1.69069900  | 4.32539800  |
| H | 2.60970300  | 2.65936600  | 3.41588500  |
| H | 1.50171100  | 3.45193400  | 4.55647600  |
| C | -0.85664700 | 2.78812600  | 3.26221300  |
| H | -1.59971300 | 2.91383600  | 2.47027300  |
| H | -1.03907900 | 1.82459500  | 3.75194300  |
| H | -1.00593400 | 3.58593700  | 4.00243000  |
| O | 0.73950800  | 1.74281200  | 1.77244200  |
| H | -0.11272500 | 1.79702900  | 0.80917200  |
| H | 2.86585000  | -3.84483600 | 2.38338200  |
| H | 5.13166000  | -2.57306400 | 1.36768400  |
| C | 0.50909500  | -2.77481200 | 1.29923100  |
| C | -0.06172600 | -2.10660800 | 2.39395200  |
| C | -0.22872600 | -3.62523600 | 0.46734100  |
| C | -1.41183700 | -2.35199000 | 2.65956200  |
| C | -1.57704400 | -3.82980700 | 0.77146900  |
| C | -2.18515100 | -3.19663900 | 1.86026000  |
| H | -1.88025900 | -1.82831100 | 3.48865700  |
| H | -2.16730400 | -4.48423400 | 0.13483700  |
| C | 4.43744400  | -0.58085000 | -0.49710600 |
| C | 4.55356300  | 0.71131500  | 0.03760800  |
| C | 5.03847100  | -0.95778800 | -1.70368200 |
| C | 5.31999600  | 1.63213800  | -0.68473100 |
| C | 5.79584400  | -0.00293800 | -2.38458900 |
| C | 5.93855100  | 1.29821300  | -1.89189200 |
| H | 5.41992200  | 2.64195300  | -0.29497100 |
| H | 6.26726600  | -0.27561000 | -3.32585700 |
| C | 0.70207700  | -1.07893600 | 3.17920500  |
| H | 1.74077700  | -1.37458700 | 3.35349600  |
| H | 0.71304900  | -0.11215800 | 2.63627500  |
| H | 0.22519100  | -0.90792000 | 4.14881900  |
| C | 0.39778100  | -4.24043800 | -0.75676700 |
| H | 1.35849700  | -4.71444500 | -0.53002500 |
| H | -0.26474600 | -4.98933800 | -1.19856700 |
| H | 0.59127800  | -3.46561800 | -1.50791100 |
| C | -3.65835800 | -3.35930300 | 2.13375600  |
| H | -4.06963600 | -4.23040400 | 1.61390900  |
| H | -3.85762300 | -3.47404300 | 3.20463800  |
| H | -4.19012800 | -2.47009300 | 1.77995400  |
| C | 3.86558700  | 1.10327600  | 1.31513900  |
| H | 2.79134100  | 1.31678500  | 1.17807300  |
| H | 3.92868700  | 0.30966800  | 2.06626400  |
| H | 4.32590500  | 2.00399700  | 1.73086200  |

|   |            |             |             |
|---|------------|-------------|-------------|
| C | 4.82918500 | -2.34134600 | -2.26465500 |
| H | 5.15129700 | -3.12038900 | -1.56488900 |
| H | 3.76638300 | -2.51560200 | -2.46541300 |
| H | 5.38203000 | -2.46970000 | -3.19870000 |
| C | 6.71307700 | 2.33529700  | -2.66817100 |
| H | 6.03933000 | 2.93946000  | -3.28754700 |
| H | 7.24205800 | 3.02223400  | -1.99992200 |
| H | 7.44739100 | 1.87238100  | -3.33466700 |

#### 4A'

|    |             |             |             |
|----|-------------|-------------|-------------|
| Cu | -0.17494400 | -0.55521900 | -0.23031400 |
| B  | 2.16446000  | 2.05706300  | -0.58324800 |
| C  | -0.14491800 | 2.39946800  | -0.76201400 |
| O  | 2.68177700  | 3.17750500  | 0.05769000  |
| O  | 2.61313000  | 0.88612000  | 0.02494200  |
| C  | 0.05758100  | -2.46679100 | 0.06911000  |
| N  | 1.12634300  | -3.30295800 | -0.09873600 |
| N  | -0.89875000 | -3.27340700 | 0.61582000  |
| C  | 0.83627500  | -4.59935800 | 0.32618400  |
| C  | -0.44061900 | -4.57590500 | 0.78270200  |
| C  | 3.00574000  | 2.75412600  | 1.39741400  |
| C  | 3.40568700  | 1.25229000  | 1.17100200  |
| C  | -0.48081300 | 3.79766200  | -0.51524200 |
| C  | 0.28045500  | 4.86981600  | -1.05511900 |
| C  | -0.05515300 | 6.20331900  | -0.83694800 |
| C  | -1.16579500 | 6.54914100  | -0.06408100 |
| C  | -1.59908000 | 4.17890300  | 0.28115800  |
| C  | -1.92594200 | 5.51344700  | 0.49126600  |
| H  | 1.16991400  | 4.65511100  | -1.63407100 |
| H  | -2.79635800 | 5.75014100  | 1.10207600  |
| H  | 0.56718400  | 6.98326900  | -1.27431800 |
| H  | -1.42835000 | 7.59128400  | 0.10403700  |
| H  | -2.18726100 | 3.38489800  | 0.72022400  |
| C  | 1.73500500  | 2.91502400  | 2.24337600  |
| H  | 1.91748600  | 2.66912400  | 3.29521200  |
| H  | 1.40026300  | 3.95257800  | 2.17251100  |
| H  | 0.92261500  | 2.29292000  | 1.85955500  |
| C  | 4.11838900  | 3.64677100  | 1.93736300  |
| H  | 3.74423700  | 4.67003800  | 2.03239800  |
| H  | 4.44534400  | 3.30890500  | 2.92735700  |
| H  | 4.98177900  | 3.66264700  | 1.26877800  |
| C  | 3.04470100  | 0.31526600  | 2.31969400  |
| H  | 3.38128500  | -0.69678000 | 2.08249500  |
| H  | 3.52619000  | 0.62901700  | 3.25294000  |
| H  | 1.96391000  | 0.28887100  | 2.46549000  |
| C  | 4.87801900  | 1.07947700  | 0.78105000  |
| H  | 5.54976000  | 1.27471900  | 1.62392900  |
| H  | 5.02944600  | 0.05237300  | 0.44283700  |

|   |             |             |             |
|---|-------------|-------------|-------------|
| H | 5.13730100  | 1.75590800  | -0.03819500 |
| C | 1.05885500  | 2.08724800  | -1.67398200 |
| H | 0.92243400  | 1.09868800  | -2.12323800 |
| H | 1.18179600  | 2.81760700  | -2.47930700 |
| C | -0.73288700 | 1.29598700  | -0.11250300 |
| O | -1.69491900 | 1.39326700  | 0.76892200  |
| C | -3.67667400 | 2.33911900  | -1.98630100 |
| H | -2.61128700 | 2.41233300  | -1.75528600 |
| H | -3.79885200 | 2.40318400  | -3.07533600 |
| H | -4.18252800 | 3.19377900  | -1.52684400 |
| C | -4.25838400 | 1.02551600  | -1.43935200 |
| C | -5.74316400 | 0.90993400  | -1.80507100 |
| H | -6.15709200 | -0.03110000 | -1.42643400 |
| H | -6.30356700 | 1.73650700  | -1.35530600 |
| H | -5.88786800 | 0.93922100  | -2.89102200 |
| C | -3.47898200 | -0.17174200 | -2.01381200 |
| H | -2.42360700 | -0.09936500 | -1.73096300 |
| H | -3.87924100 | -1.10626400 | -1.61060200 |
| H | -3.54343200 | -0.20170400 | -3.10961400 |
| O | -4.20866900 | 1.01308700  | -0.02073400 |
| H | -3.25654300 | 1.11978200  | 0.26712100  |
| H | -1.05884600 | -5.35037300 | 1.20571000  |
| H | 1.55300700  | -5.40088000 | 0.25757100  |
| C | -2.23217200 | -2.81884500 | 0.90874800  |
| C | -3.28712700 | -3.32902000 | 0.13505700  |
| C | -2.43650700 | -1.83677900 | 1.89085500  |
| C | -4.57372700 | -2.84202800 | 0.37280500  |
| C | -3.73901400 | -1.36800800 | 2.06800000  |
| C | -4.81333800 | -1.84217000 | 1.31776900  |
| H | -5.39479300 | -3.20683200 | -0.23971800 |
| H | -3.90291000 | -0.56200700 | 2.77708700  |
| C | 2.39711000  | -2.86918300 | -0.60033600 |
| C | 3.51495300  | -2.94106200 | 0.24544200  |
| C | 2.48763300  | -2.36618200 | -1.90694500 |
| C | 4.74564300  | -2.50983600 | -0.25264500 |
| C | 3.73843600  | -1.92750800 | -2.34971200 |
| C | 4.87439300  | -1.98678900 | -1.54225100 |
| H | 5.61739300  | -2.55452100 | 0.39590400  |
| H | 3.81887900  | -1.51846800 | -3.35351500 |
| C | -1.32966200 | -1.19265800 | 2.68261200  |
| H | -0.40756800 | -1.77672800 | 2.68275600  |
| H | -1.14173900 | -0.20456300 | 2.23536800  |
| H | -1.64893300 | -1.04116500 | 3.71937100  |
| C | -3.04023100 | -4.30847400 | -0.98643300 |
| H | -2.21150800 | -3.97390100 | -1.61937200 |
| H | -2.78555500 | -5.31340000 | -0.62903000 |
| H | -3.93112000 | -4.39579200 | -1.61322300 |
| C | -6.16233300 | -1.19074400 | 1.45454400  |

|   |             |             |             |
|---|-------------|-------------|-------------|
| H | -6.93537400 | -1.73151900 | 0.89991200  |
| H | -6.47546400 | -1.11825700 | 2.50226700  |
| H | -6.07738500 | -0.17609700 | 1.05031000  |
| C | 3.40028200  | -3.42949700 | 1.66887000  |
| H | 3.30506000  | -4.51951700 | 1.73165000  |
| H | 4.28666100  | -3.14247800 | 2.24004200  |
| H | 2.52262600  | -3.00090400 | 2.16104900  |
| C | 1.28647600  | -2.26155500 | -2.80699600 |
| H | 0.64545900  | -3.14540500 | -2.73464500 |
| H | 0.67099800  | -1.39841700 | -2.51857600 |
| H | 1.59645600  | -2.13457200 | -3.84754300 |
| C | 6.19647600  | -1.44383200 | -2.02304700 |
| H | 7.03812900  | -2.01506600 | -1.61820900 |
| H | 6.26361800  | -1.46046600 | -3.11476700 |
| H | 6.32178600  | -0.40286700 | -1.70100000 |

#### TS4A

|    |             |             |             |
|----|-------------|-------------|-------------|
| H  | 0.83217000  | -2.36893500 | -1.59195200 |
| C  | 2.09739500  | 1.29725600  | -0.13209300 |
| C  | 3.68442000  | 2.83916100  | 0.42127900  |
| C  | 2.50465600  | 3.49906900  | 0.28628700  |
| H  | 4.67473500  | 3.18542500  | 0.66915900  |
| H  | 2.25414500  | 4.54241700  | 0.38815900  |
| N  | 1.54996000  | 2.54211300  | -0.04586300 |
| N  | 3.41204300  | 1.49873700  | 0.16251400  |
| C  | 4.34226600  | 0.41100000  | 0.26571200  |
| C  | 4.45799000  | -0.24991900 | 1.49476900  |
| C  | 5.02400000  | -0.00888800 | -0.88231700 |
| C  | 5.32626600  | -1.34204800 | 1.56300100  |
| C  | 5.87971600  | -1.10527600 | -0.76586100 |
| C  | 6.03546200  | -1.78665300 | 0.44431400  |
| H  | 5.42182300  | -1.87823900 | 2.50394400  |
| H  | 6.40164600  | -1.46030600 | -1.65066500 |
| C  | 0.14017800  | 2.79519400  | -0.16760000 |
| C  | -0.57954600 | 3.04524200  | 1.01206900  |
| C  | -0.47531500 | 2.74330000  | -1.42576900 |
| C  | -1.94727800 | 3.30591400  | 0.90154200  |
| C  | -1.84798900 | 3.01399300  | -1.47876500 |
| C  | -2.59907500 | 3.28914400  | -0.33299800 |
| H  | -2.52159900 | 3.48455900  | 1.80732000  |
| H  | -2.34547200 | 2.97465800  | -2.44422700 |
| Cu | 1.23901200  | -0.30378700 | -0.74612200 |
| C  | 2.83512200  | -2.81673400 | -1.17995600 |
| H  | 2.75732700  | -1.67658500 | -1.13908800 |
| H  | 3.59135200  | -2.99455300 | -1.98047600 |
| H  | 3.32949300  | -3.07747800 | -0.21647000 |
| O  | 1.62939400  | -3.40033300 | -1.38059900 |
| O  | -4.03675200 | -2.13149600 | -0.51382500 |

|   |             |             |             |
|---|-------------|-------------|-------------|
| C | -5.39249800 | -2.12242900 | -0.03265900 |
| C | -5.57934100 | -0.63519600 | 0.44141200  |
| O | -4.64075600 | 0.07119800  | -0.39842000 |
| B | -3.66548500 | -0.83661800 | -0.81494900 |
| C | -5.52280400 | -3.16928100 | 1.06956000  |
| H | -5.35356500 | -4.16421300 | 0.64819400  |
| H | -4.78206700 | -3.00757500 | 1.85371100  |
| H | -6.52425800 | -3.14945600 | 1.51425300  |
| C | -6.28900300 | -2.48985600 | -1.22137100 |
| H | -5.95512700 | -3.44886800 | -1.62586000 |
| H | -7.34105600 | -2.57838900 | -0.93100400 |
| H | -6.20433400 | -1.74231700 | -2.01467600 |
| C | -6.97177700 | -0.05338700 | 0.21273200  |
| H | -7.72636900 | -0.61160600 | 0.77778500  |
| H | -6.99357800 | 0.98635400  | 0.55311000  |
| H | -7.24357200 | -0.06849300 | -0.84428900 |
| C | -5.14583600 | -0.40856000 | 1.89457200  |
| H | -5.11189700 | 0.66824800  | 2.08592300  |
| H | -5.84767700 | -0.86392100 | 2.60082900  |
| H | -4.14540500 | -0.80887200 | 2.07282200  |
| C | -1.08867600 | -1.05130200 | -0.96666600 |
| C | -2.34938600 | -0.41311100 | -1.52133100 |
| H | -2.35176200 | -0.70772700 | -2.58267400 |
| H | -2.30015400 | 0.68484100  | -1.52266000 |
| C | -0.07620500 | -1.42885900 | -1.91440100 |
| O | -0.21215900 | -1.20796300 | -3.16122200 |
| C | -0.85044200 | -1.11144400 | 0.45983400  |
| C | -1.55925400 | -0.26892300 | 1.36873500  |
| C | 0.14347700  | -1.96804700 | 1.04766800  |
| C | -1.27183800 | -0.24424400 | 2.73014900  |
| H | -2.30511800 | 0.41361200  | 0.97843700  |
| C | 0.43187500  | -1.90587300 | 2.40643600  |
| H | 0.65132700  | -2.69594800 | 0.41594500  |
| C | -0.25652800 | -1.04035000 | 3.27302500  |
| H | -1.83770400 | 0.42738900  | 3.37494100  |
| H | 1.19413500  | -2.57356900 | 2.80541100  |
| H | -0.03219000 | -1.01556500 | 4.33613800  |
| C | 0.07860200  | 2.94930900  | 2.36493900  |
| H | 0.38553900  | 1.91493400  | 2.55706200  |
| H | 0.96650400  | 3.58340200  | 2.45230900  |
| H | -0.62460100 | 3.23643100  | 3.15101400  |
| C | 0.25044700  | 2.33457400  | -2.68110300 |
| H | 1.32627000  | 2.51156500  | -2.61573600 |
| H | 0.09866400  | 1.26133600  | -2.87379600 |
| H | -0.14168300 | 2.88477000  | -3.54274100 |
| C | -4.09476200 | 3.45179500  | -0.42284300 |
| H | -4.49459800 | 3.97986700  | 0.44893500  |
| H | -4.38694200 | 4.00388800  | -1.32253500 |

|   |             |             |             |
|---|-------------|-------------|-------------|
| H | -4.56313200 | 2.46122700  | -0.46863800 |
| C | 6.89148100  | -3.02613900 | 0.51770400  |
| H | 7.75560300  | -2.95914600 | -0.15090300 |
| H | 7.25570900  | -3.20513600 | 1.53393900  |
| H | 6.30892300  | -3.90442900 | 0.21468700  |
| C | 3.60873400  | 0.14952000  | 2.67349500  |
| H | 3.59391000  | 1.23374100  | 2.82198600  |
| H | 2.57152600  | -0.17221300 | 2.51897300  |
| H | 3.97360400  | -0.32115400 | 3.59033100  |
| C | 4.75305500  | 0.63624700  | -2.21507600 |
| H | 3.74670700  | 0.35948500  | -2.55241100 |
| H | 4.79042100  | 1.72880400  | -2.16054600 |
| H | 5.47104600  | 0.29826100  | -2.96627800 |

**5A'**

|    |             |             |             |
|----|-------------|-------------|-------------|
| Cu | 1.60518800  | -0.03995700 | 1.04431700  |
| B  | -2.63710300 | 1.72942000  | 0.64576800  |
| C  | -1.79559000 | -0.22610800 | -0.46668100 |
| O  | -4.01911600 | 1.85510200  | 0.65809700  |
| O  | -2.03180300 | 2.88609600  | 0.17024100  |
| C  | 2.13368500  | -1.59567300 | 0.09593100  |
| N  | 1.65735100  | -2.87185100 | 0.07779700  |
| N  | 3.25149800  | -1.64862700 | -0.68129000 |
| C  | 2.47069100  | -3.70320300 | -0.68676200 |
| C  | 3.47689400  | -2.93107500 | -1.17088500 |
| C  | -4.34204300 | 2.95694700  | -0.21770700 |
| C  | -3.06149800 | 3.85744600  | -0.09326900 |
| H  | 2.25285300  | -4.75038700 | -0.81365200 |
| H  | 4.31474900  | -3.16300700 | -1.80767000 |
| C  | -2.94318000 | -0.97473500 | -0.93732000 |
| C  | -4.06690500 | -1.23117500 | -0.10404300 |
| C  | -5.15110000 | -1.98980200 | -0.53764800 |
| C  | -5.18556400 | -2.53030100 | -1.82602800 |
| C  | -3.02284500 | -1.49919100 | -2.25933600 |
| C  | -4.10802300 | -2.25843400 | -2.67979600 |
| H  | -4.09588600 | -0.81028600 | 0.89236400  |
| H  | -4.11788200 | -2.64295500 | -3.69894300 |
| H  | -5.98553700 | -2.15479700 | 0.14267500  |
| H  | -6.03135400 | -3.12510000 | -2.16165400 |
| H  | -2.19423700 | -1.29242200 | -2.92444700 |
| C  | -5.63723100 | 3.60360300  | 0.25989600  |
| H  | -5.87621100 | 4.48907000  | -0.33985300 |
| H  | -6.46008200 | 2.89003800  | 0.15762000  |
| H  | -5.57241500 | 3.89852300  | 1.30905300  |
| C  | -4.52192700 | 2.36038500  | -1.61938800 |
| H  | -5.28310200 | 1.57797500  | -1.57019400 |
| H  | -4.83160300 | 3.11568300  | -2.34933900 |
| H  | -3.59648300 | 1.88880400  | -1.95964900 |



|   |             |             |             |
|---|-------------|-------------|-------------|
| C | -3.10712000 | 4.80391800  | 1.11194300  |
| H | -2.10884800 | 5.22163800  | 1.26742200  |
| H | -3.81334200 | 5.62707700  | 0.95992400  |
| H | -3.38958600 | 4.25967300  | 2.01703400  |
| C | -2.69089200 | 4.62581800  | -1.35768300 |
| H | -3.48720000 | 5.32414300  | -1.63954100 |
| H | -1.77622200 | 5.19973400  | -1.18183800 |
| H | -2.50633700 | 3.94442700  | -2.18917700 |
| C | -1.83863300 | 0.42815400  | 0.92437900  |
| H | -2.27800700 | -0.23566000 | 1.67648900  |
| H | -0.83160400 | 0.68605800  | 1.26392300  |
| C | -0.64290600 | 0.00198300  | -1.23032400 |
| O | -0.32044100 | -0.43011400 | -2.38498600 |
| C | 3.14348600  | 2.87400700  | 2.33761200  |
| H | 3.80135300  | 2.18944700  | 1.79108100  |
| H | 3.52075400  | 3.89701900  | 2.20156500  |
| H | 3.19416700  | 2.62119500  | 3.40258900  |
| C | 1.69385500  | 2.70389800  | 1.83252000  |
| C | 0.76112800  | 3.67772900  | 2.58191800  |
| H | -0.25858000 | 3.54976700  | 2.20852700  |
| H | 0.76959700  | 3.44639000  | 3.65268900  |
| H | 1.05831700  | 4.72675200  | 2.44793500  |
| C | 1.64227500  | 3.03127500  | 0.32361100  |
| H | 2.28554300  | 2.33923800  | -0.23318600 |
| H | 0.61729600  | 2.92266100  | -0.04101000 |
| H | 1.98184700  | 4.05537600  | 0.11312100  |
| O | 1.24855300  | 1.40861600  | 2.09944900  |
| H | 0.09659600  | 0.65270100  | -0.71755200 |
| C | 4.00563700  | -0.46594900 | -0.98638800 |
| C | 4.91467200  | 0.01691700  | -0.03569000 |
| C | 3.73325500  | 0.20979000  | -2.18575100 |
| C | 5.56761500  | 1.22074600  | -0.30827300 |
| C | 4.41400600  | 1.41158900  | -2.40988700 |
| C | 5.31700000  | 1.93665600  | -1.48237000 |
| H | 6.26525500  | 1.61807300  | 0.42463800  |
| H | 4.21048100  | 1.96025100  | -3.32607000 |
| C | 0.39470100  | -3.24543000 | 0.65770600  |
| C | 0.24790700  | -3.22047000 | 2.04890600  |
| C | -0.67010200 | -3.54738300 | -0.20938200 |
| C | -1.02117700 | -3.49326100 | 2.57186900  |
| C | -1.91364500 | -3.81694400 | 0.36289800  |
| C | -2.10985900 | -3.77862100 | 1.74693800  |
| H | -1.15935000 | -3.46340900 | 3.65018600  |
| H | -2.75890300 | -4.00238700 | -0.29263000 |
| C | -0.50322000 | -3.53092400 | -1.70532300 |
| H | -1.45254500 | -3.77066400 | -2.18560600 |
| H | -0.21173300 | -2.52955600 | -2.05051900 |
| H | 0.24910100  | -4.25131200 | -2.04564700 |

|   |             |             |             |
|---|-------------|-------------|-------------|
| C | 1.39566500  | -2.88497200 | 2.96845900  |
| H | 2.33684200  | -3.32001900 | 2.61793400  |
| H | 1.54914400  | -1.80094900 | 3.02640800  |
| H | 1.19629300  | -3.25366900 | 3.97879500  |
| C | -3.48426200 | -4.02047300 | 2.31757600  |
| H | -4.20380400 | -3.33926700 | 1.85271800  |
| H | -3.82876800 | -5.04238800 | 2.11658500  |
| H | -3.50274100 | -3.86419700 | 3.40022500  |
| C | 5.12877900  | -0.70456900 | 1.26946400  |
| H | 4.26191900  | -0.55489800 | 1.92410300  |
| H | 5.24066000  | -1.78353200 | 1.12406300  |
| H | 6.01636400  | -0.32465100 | 1.78204200  |
| C | 2.71889100  | -0.30941500 | -3.16670800 |
| H | 2.90750900  | -1.35792200 | -3.42206900 |
| H | 1.68591400  | -0.26482500 | -2.77395700 |
| H | 2.75313300  | 0.27489500  | -4.09045400 |
| C | 5.97244800  | 3.27517400  | -1.71766100 |
| H | 6.97436900  | 3.31501400  | -1.27846000 |
| H | 6.05654700  | 3.49873700  | -2.78549500 |
| H | 5.38212700  | 4.07770900  | -1.25901400 |

## 5A

|    |             |             |             |
|----|-------------|-------------|-------------|
| Cu | 0.48894300  | 0.17453100  | -0.22141800 |
| B  | -2.13908500 | 0.21047300  | 1.32761300  |
| C  | -2.98989600 | 0.72555100  | -0.84885500 |
| O  | -0.90637200 | -0.43525100 | 1.20467100  |
| O  | -2.96186000 | -0.47309100 | 2.18686500  |
| C  | 2.37317800  | 0.41774500  | -0.32974400 |
| N  | 3.04002300  | 1.60473500  | -0.35135300 |
| N  | 3.31699500  | -0.49597200 | -0.69299800 |
| C  | 4.37161800  | 1.43840200  | -0.72330200 |
| C  | 4.54762000  | 0.10906100  | -0.94007100 |
| C  | -0.88815200 | -1.59265600 | 2.09433800  |
| C  | -2.42385000 | -1.81765300 | 2.32408500  |
| C  | -4.42916300 | 0.49656400  | -1.05051300 |
| C  | -4.99314800 | 0.42576400  | -2.34387700 |
| C  | -6.34932600 | 0.18053600  | -2.53576900 |
| C  | -7.20627900 | 0.02427900  | -1.44339400 |
| C  | -5.31482300 | 0.34952900  | 0.03899600  |
| C  | -6.67557700 | 0.11902300  | -0.15657300 |
| H  | -4.35747000 | 0.59515300  | -3.20678900 |
| H  | -7.32492000 | 0.00504500  | 0.70809000  |
| H  | -6.74495300 | 0.13494600  | -3.54739100 |
| H  | -8.26692700 | -0.15444300 | -1.59378400 |
| H  | -4.92757900 | 0.38097000  | 1.05053600  |
| C  | -0.13263900 | -1.16204400 | 3.35130700  |
| H  | -0.01609700 | -1.99414100 | 4.05113100  |
| H  | 0.86128200  | -0.81078900 | 3.05939600  |

|   |             |             |             |
|---|-------------|-------------|-------------|
| H | -0.64989000 | -0.34463900 | 3.86025400  |
| C | -0.16168800 | -2.72919900 | 1.38916900  |
| H | 0.88792400  | -2.46599700 | 1.24244000  |
| H | -0.20228200 | -3.64311500 | 1.99050300  |
| H | -0.59385000 | -2.93409100 | 0.40920100  |
| C | -2.79052000 | -2.35267800 | 3.70105500  |
| H | -3.87610600 | -2.45727700 | 3.77450600  |
| H | -2.34153400 | -3.33777200 | 3.86483000  |
| H | -2.45959000 | -1.67976300 | 4.49383500  |
| C | -3.07416400 | -2.65531700 | 1.21853500  |
| H | -2.76497400 | -3.70306300 | 1.26989600  |
| H | -4.15947600 | -2.60235500 | 1.33072100  |
| H | -2.82531300 | -2.25666600 | 0.23105600  |
| C | -2.50902800 | 1.42132900  | 0.42780100  |
| H | -1.63957600 | 2.04879000  | 0.19881700  |
| H | -3.29719000 | 2.05228500  | 0.84566300  |
| C | -2.07403700 | 0.26302600  | -1.76054500 |
| O | -0.77379800 | 0.38072100  | -1.72401800 |
| H | -2.46931800 | -0.26902000 | -2.63726000 |
| H | 5.41216700  | -0.45533200 | -1.24943900 |
| H | 5.05147300  | 2.27084600  | -0.80471800 |
| C | 2.38316600  | 2.84836100  | -0.05921900 |
| C | 2.52282200  | 3.38988300  | 1.22585000  |
| C | 1.57625800  | 3.43765100  | -1.04352900 |
| C | 1.83998700  | 4.57274900  | 1.51434700  |
| C | 0.90911700  | 4.61885000  | -0.70314700 |
| C | 1.02458500  | 5.19680000  | 0.56412200  |
| H | 1.93640700  | 5.00871300  | 2.50532200  |
| H | 0.27823500  | 5.09351100  | -1.45014800 |
| C | 3.01182400  | -1.89265300 | -0.81317300 |
| C | 2.26134900  | -2.33332100 | -1.91281700 |
| C | 3.41282300  | -2.75426000 | 0.21927200  |
| C | 1.92141900  | -3.69060200 | -1.95481400 |
| C | 3.05620000  | -4.09998100 | 0.12522000  |
| C | 2.30833600  | -4.58477600 | -0.95412600 |
| H | 1.33529300  | -4.05334200 | -2.79515000 |
| H | 3.35119300  | -4.78017300 | 0.92018400  |
| C | 3.35272000  | 2.68856100  | 2.27115400  |
| H | 2.97523200  | 1.67511300  | 2.44765100  |
| H | 4.39947900  | 2.58795100  | 1.96517700  |
| H | 3.32685400  | 3.23393200  | 3.21717400  |
| C | 1.38916000  | 2.81016300  | -2.40033300 |
| H | 1.07336200  | 3.56321600  | -3.12709000 |
| H | 2.31069800  | 2.34564700  | -2.76268700 |
| H | 0.61718500  | 2.03017400  | -2.35753600 |
| C | 0.25837200  | 6.45003500  | 0.90875500  |
| H | -0.76632700 | 6.20799500  | 1.21507300  |
| H | 0.72858200  | 6.99298200  | 1.73339800  |

|   |            |             |             |
|---|------------|-------------|-------------|
| H | 0.18916300 | 7.12404600  | 0.04988100  |
| C | 1.80115400 | -1.39300200 | -2.99795800 |
| H | 0.86972700 | -0.88263000 | -2.71663700 |
| H | 2.54519700 | -0.61733100 | -3.19925400 |
| H | 1.62038400 | -1.94539600 | -3.92394100 |
| C | 4.15280600 | -2.22481500 | 1.42154000  |
| H | 4.31772600 | -3.01739900 | 2.15480800  |
| H | 5.12752500 | -1.80413100 | 1.15320200  |
| H | 3.58478000 | -1.42147900 | 1.90399400  |
| C | 1.94774700 | -6.04700000 | -1.04314700 |
| H | 1.05257500 | -6.20006900 | -1.65191200 |
| H | 2.75960200 | -6.62513800 | -1.50113700 |
| H | 1.76468800 | -6.47333200 | -0.05233100 |

**COM4-6a**

|   |             |             |             |
|---|-------------|-------------|-------------|
| P | 0.05871400  | -1.40518200 | -1.48015300 |
| C | -0.07579800 | -3.22456700 | -1.09681500 |
| H | -0.78383600 | -3.35310400 | -0.27151800 |
| H | -0.50959600 | -3.71643800 | -1.97283500 |
| C | 1.26119600  | -3.90019000 | -0.77138900 |
| H | 1.09691500  | -4.98430400 | -0.79063000 |
| H | 1.97924400  | -3.68748700 | -1.56950200 |
| C | 1.85569700  | -3.55101500 | 0.59898400  |
| H | 2.63358200  | -4.26959400 | 0.87841300  |
| H | 1.07922500  | -3.62730000 | 1.36730500  |
| P | 2.56265000  | -1.84563300 | 0.79094600  |
| C | -1.55947000 | -1.10289100 | -2.31154900 |
| C | -1.72156600 | 0.07974900  | -3.05085300 |
| C | -2.62855700 | -2.00816900 | -2.23222000 |
| C | -2.92380900 | 0.34386300  | -3.70214600 |
| H | -0.90737400 | 0.79568100  | -3.10736100 |
| C | -3.83179200 | -1.73719100 | -2.88968200 |
| H | -2.55307400 | -2.91004900 | -1.63944900 |
| C | -3.98279400 | -0.56451700 | -3.62884500 |
| H | -3.03056100 | 1.26277700  | -4.27087700 |
| H | -4.64850200 | -2.45061500 | -2.82521000 |
| H | -4.91736300 | -0.35915300 | -4.14278400 |
| C | 1.21848200  | -1.46626600 | -2.90165700 |
| C | 0.91254300  | -2.21116000 | -4.05063100 |
| C | 2.45989400  | -0.82903600 | -2.80796100 |
| C | 1.84700200  | -2.33484800 | -5.07605000 |
| H | -0.06014000 | -2.68559600 | -4.14482300 |
| C | 3.39933000  | -0.96056000 | -3.83122100 |
| H | 2.68092300  | -0.22228800 | -1.93968000 |
| C | 3.09594800  | -1.71560200 | -4.96268000 |
| H | 1.60321300  | -2.91124600 | -5.96377300 |
| H | 4.36269800  | -0.47087700 | -3.73545600 |
| H | 3.82488700  | -1.81738600 | -5.76151600 |

|    |             |             |             |
|----|-------------|-------------|-------------|
| C  | 3.04084100  | -1.90612000 | 2.55661100  |
| C  | 2.01113300  | -2.01790200 | 3.50398400  |
| C  | 4.36242800  | -1.78454600 | 2.99543300  |
| C  | 2.30058900  | -2.02181400 | 4.86549200  |
| H  | 0.97634900  | -2.06009400 | 3.17353500  |
| C  | 4.64914700  | -1.77443500 | 4.36124200  |
| H  | 5.16547600  | -1.68718900 | 2.27380600  |
| C  | 3.62292800  | -1.89475500 | 5.29754000  |
| H  | 1.49448600  | -2.10145400 | 5.58861700  |
| H  | 5.67813200  | -1.67006700 | 4.69207200  |
| H  | 3.84958400  | -1.88310700 | 6.35935600  |
| C  | 4.14361100  | -1.88178100 | -0.12985800 |
| C  | 4.62185000  | -3.02287500 | -0.78740200 |
| C  | 4.86585200  | -0.68142000 | -0.23750000 |
| C  | 5.78760600  | -2.96218200 | -1.55154600 |
| H  | 4.08851100  | -3.96350600 | -0.72070400 |
| C  | 6.03689000  | -0.62822400 | -0.98985900 |
| H  | 4.50330700  | 0.21059500  | 0.26139300  |
| C  | 6.49680000  | -1.76621800 | -1.65681200 |
| H  | 6.13884500  | -3.85171800 | -2.06576400 |
| H  | 6.58303200  | 0.30739900  | -1.06294400 |
| H  | 7.40198800  | -1.72017900 | -2.25479800 |
| Pd | 1.06746900  | -0.09902900 | 0.30360600  |
| C  | 2.18587200  | 1.17217400  | 2.87785800  |
| C  | 2.18852800  | 1.17571900  | 1.47815600  |
| C  | 3.07662800  | 2.05061400  | 0.82942000  |
| C  | 3.91362700  | 2.90485800  | 1.55665400  |
| C  | 3.89417500  | 2.89070900  | 2.95205700  |
| C  | 3.02662300  | 2.01587000  | 3.60846900  |
| H  | 1.51708900  | 0.51817900  | 3.41769800  |
| H  | 4.57594400  | 3.58292300  | 1.02355900  |
| H  | 4.54723600  | 3.54856000  | 3.51924300  |
| H  | 3.00103900  | 1.98372900  | 4.69480800  |
| I  | 1.01815000  | 2.55186900  | -2.18459200 |
| H  | 3.09968000  | 2.09542700  | -0.25308600 |
| Cu | -0.20920300 | 2.01998900  | 0.14381200  |
| B  | -3.30329900 | -2.04502600 | 1.33095500  |
| C  | -2.28173700 | 0.34104700  | 1.76808600  |
| C  | 0.54415900  | 4.48324200  | 2.27906500  |
| O  | -4.48966300 | -1.78745200 | 1.96240500  |
| O  | -3.28736400 | -3.27378600 | 0.70221900  |
| C  | -0.96619800 | 3.85855100  | 0.41029200  |
| N  | -0.51715800 | 4.76668200  | 1.31356000  |
| N  | -1.84097300 | 4.55001200  | -0.36028500 |
| C  | -1.09161600 | 6.01153900  | 1.10199500  |
| C  | -1.93229300 | 5.87308700  | 0.04180100  |
| C  | -5.44437800 | -2.78747200 | 1.51215200  |
| C  | -4.50463900 | -3.97265900 | 1.08720700  |

|   |             |             |             |
|---|-------------|-------------|-------------|
| C | -2.47830000 | 3.98820100  | -1.54208900 |
| H | -0.86637000 | 6.86490200  | 1.72145900  |
| H | -2.58527600 | 6.58110000  | -0.44293800 |
| H | -1.83071400 | 4.12473700  | -2.41175300 |
| H | -3.44551700 | 4.46862400  | -1.69633400 |
| H | -2.63379800 | 2.92373200  | -1.38062100 |
| H | 0.43509500  | 5.15307000  | 3.13463700  |
| H | 1.52456700  | 4.62837900  | 1.81932200  |
| H | 0.45938700  | 3.44940700  | 2.61116000  |
| C | -3.33144600 | 1.14285900  | 1.02479400  |
| C | -3.90033600 | 0.72887100  | -0.18311300 |
| C | -4.91997100 | 1.47072900  | -0.78481300 |
| C | -5.36934300 | 2.65283000  | -0.19996600 |
| C | -3.77538200 | 2.34748200  | 1.59136100  |
| C | -4.78107000 | 3.09705300  | 0.98834200  |
| H | -3.56566800 | -0.18071900 | -0.66222100 |
| H | -5.11164900 | 4.02388100  | 1.44832500  |
| H | -2.58809200 | 0.31175900  | 2.82012800  |
| H | -5.35145300 | 1.11795800  | -1.71598800 |
| H | -6.16482500 | 3.22778900  | -0.66550600 |
| H | -3.32329600 | 2.68875000  | 2.51821500  |
| C | -6.20247000 | -2.16474200 | 0.33592200  |
| H | -7.00566600 | -2.81877400 | -0.01611500 |
| H | -6.63773900 | -1.21687900 | 0.66056900  |
| H | -5.53021700 | -1.95074700 | -0.49797600 |
| C | -6.40000700 | -3.10074200 | 2.65620600  |
| H | -6.99169900 | -2.21223200 | 2.89154700  |
| H | -7.08834700 | -3.90442200 | 2.37539300  |
| H | -5.86269200 | -3.39810900 | 3.55788700  |
| C | -4.99262700 | -4.78792400 | -0.10383700 |
| H | -4.26175500 | -5.56552200 | -0.34256900 |
| H | -5.94536300 | -5.27583200 | 0.12501100  |
| H | -5.12615400 | -4.16305300 | -0.98813700 |
| C | -4.13463300 | -4.89449200 | 2.25177100  |
| H | -4.98403600 | -5.50728400 | 2.56603100  |
| H | -3.32628000 | -5.55911100 | 1.93566200  |
| H | -3.78483100 | -4.31796100 | 3.11226800  |
| C | -2.06972300 | -1.08785700 | 1.28185700  |
| H | -1.70460700 | -1.06568700 | 0.25524400  |
| H | -1.24524700 | -1.53614200 | 1.85362300  |
| C | -0.92313300 | 1.11363400  | 1.80656100  |
| O | -0.57324100 | 1.52522800  | 2.89550400  |

## TS21

|   |             |             |            |
|---|-------------|-------------|------------|
| P | 0.30553000  | -0.20288100 | 1.80925500 |
| C | 0.25795500  | 1.36516100  | 2.83723200 |
| H | -0.46903100 | 2.04429300  | 2.38169200 |
| H | -0.13873200 | 1.09612200  | 3.82052300 |

|   |             |             |             |
|---|-------------|-------------|-------------|
| C | 1.61294600  | 2.05907200  | 3.02250700  |
| H | 1.48128400  | 2.83970900  | 3.78214900  |
| H | 2.33216500  | 1.34771000  | 3.43689500  |
| C | 2.18598600  | 2.73634100  | 1.77389400  |
| H | 3.03232800  | 3.37854500  | 2.03939300  |
| H | 1.42487300  | 3.39537300  | 1.34482900  |
| P | 2.71901500  | 1.64881200  | 0.36203300  |
| C | -1.12809400 | -1.08649900 | 2.56108600  |
| C | -1.02779900 | -2.45016600 | 2.87466800  |
| C | -2.30072800 | -0.39170800 | 2.89623000  |
| C | -2.07058300 | -3.09645100 | 3.53768200  |
| H | -0.13665400 | -3.00309900 | 2.59947100  |
| C | -3.35038100 | -1.04986900 | 3.53955700  |
| H | -2.40145600 | 0.66123700  | 2.65673100  |
| C | -3.23433700 | -2.40093600 | 3.87232200  |
| H | -1.97351700 | -4.14935600 | 3.78513600  |
| H | -4.25105500 | -0.49822300 | 3.79360500  |
| H | -4.04468000 | -2.90798300 | 4.38778200  |
| C | 1.69817100  | -1.09111600 | 2.61661700  |
| C | 1.75531900  | -1.19548500 | 4.01753300  |
| C | 2.71927600  | -1.65702100 | 1.85091700  |
| C | 2.82505900  | -1.83650300 | 4.63447100  |
| H | 0.95578300  | -0.78458000 | 4.62641500  |
| C | 3.78520200  | -2.31322500 | 2.46951500  |
| H | 2.66801900  | -1.60538700 | 0.77251000  |
| C | 3.84469800  | -2.39652700 | 3.85721400  |
| H | 2.86135300  | -1.90745900 | 5.71762600  |
| H | 4.56641000  | -2.75002900 | 1.85833800  |
| H | 4.67768900  | -2.90151900 | 4.33751700  |
| C | 3.24015200  | 2.96149000  | -0.81459900 |
| C | 2.31001600  | 3.95033100  | -1.17119600 |
| C | 4.50188900  | 2.97437300  | -1.41854800 |
| C | 2.63462000  | 4.92898900  | -2.10718000 |
| H | 1.31418700  | 3.94191700  | -0.74162600 |
| C | 4.82225900  | 3.94904900  | -2.36366200 |
| H | 5.23476200  | 2.21902300  | -1.16283500 |
| C | 3.89292600  | 4.92811400  | -2.71193000 |
| H | 1.90027500  | 5.68358200  | -2.37330900 |
| H | 5.80289900  | 3.93822400  | -2.82970700 |
| H | 4.14481100  | 5.68370700  | -3.44977700 |
| C | 4.29867200  | 0.88920000  | 0.87756300  |
| C | 4.91238500  | 1.14705200  | 2.10890900  |
| C | 4.88979300  | -0.03293300 | -0.00352600 |
| C | 6.09218800  | 0.49004500  | 2.45893700  |
| H | 4.47385100  | 1.85033800  | 2.80734200  |
| C | 6.07980400  | -0.66896000 | 0.34060000  |
| H | 4.41053500  | -0.25575100 | -0.95196000 |
| C | 6.68060100  | -0.41458400 | 1.57582500  |

|    |             |             |             |
|----|-------------|-------------|-------------|
| H  | 6.55082000  | 0.68761400  | 3.42311000  |
| H  | 6.52858600  | -1.37564800 | -0.35087300 |
| H  | 7.59969700  | -0.92349800 | 1.85019000  |
| Pd | 0.91632900  | 0.27339800  | -0.54860700 |
| C  | 1.98878300  | 1.40487800  | -3.21563300 |
| C  | 1.92414200  | 0.33189800  | -2.32521700 |
| C  | 2.62970500  | -0.84129700 | -2.61910800 |
| C  | 3.42597300  | -0.91436800 | -3.76770300 |
| C  | 3.51210400  | 0.17280800  | -4.63894200 |
| C  | 2.78198000  | 1.32980400  | -4.36308300 |
| H  | 1.42662800  | 2.31168700  | -3.02447500 |
| H  | 3.96981600  | -1.83140400 | -3.98068800 |
| H  | 4.13122100  | 0.11387200  | -5.52977800 |
| H  | 2.82689600  | 2.17946200  | -5.03956000 |
| I  | 0.99054100  | -3.77654600 | -0.41503900 |
| H  | 2.54771300  | -1.70973500 | -1.97138500 |
| Cu | -0.72753600 | -1.97241700 | -1.15033800 |
| B  | -2.47281800 | 3.11361100  | 0.20995000  |
| C  | -1.73055100 | 1.50011700  | -1.70664000 |
| C  | -2.67194400 | -2.06419700 | -4.12302600 |
| O  | -3.39029200 | 4.02505800  | -0.23663200 |
| O  | -2.69097200 | 2.73325600  | 1.51756900  |
| C  | -2.52935500 | -2.68299800 | -1.70516700 |
| N  | -3.17008600 | -2.69710700 | -2.90791200 |
| N  | -3.33767100 | -3.43264500 | -0.90662900 |
| C  | -4.35374700 | -3.41687600 | -2.84984300 |
| C  | -4.46154200 | -3.88183200 | -1.57910100 |
| C  | -4.46992000 | 4.08560100  | 0.73657100  |
| C  | -3.78542300 | 3.53188000  | 2.04569600  |
| C  | -3.04253700 | -3.70196400 | 0.48980000  |
| H  | -4.99460600 | -3.54161600 | -3.70774000 |
| H  | -5.21513800 | -4.49130400 | -1.10690900 |
| H  | -1.96518100 | -3.82772900 | 0.59958000  |
| H  | -3.54871000 | -4.61979500 | 0.79661600  |
| H  | -3.37586200 | -2.87736700 | 1.12042500  |
| H  | -2.88495700 | -0.99518200 | -4.11087600 |
| H  | -3.15214800 | -2.53693600 | -4.98215700 |
| H  | -1.59354700 | -2.19389600 | -4.18140700 |
| C  | -3.06397500 | 0.84170600  | -1.43821200 |
| C  | -3.29113400 | 0.15617900  | -0.23947000 |
| C  | -4.51112300 | -0.47009600 | 0.00835600  |
| C  | -5.51701600 | -0.45087900 | -0.95843900 |
| C  | -4.07946100 | 0.85388900  | -2.40198800 |
| C  | -5.29473100 | 0.21009700  | -2.16817000 |
| H  | -2.50531400 | 0.10785900  | 0.49836700  |
| H  | -6.07141600 | 0.23189300  | -2.92715500 |
| H  | -1.80271200 | 2.00238300  | -2.67549900 |
| H  | -4.66438200 | -0.98110400 | 0.95365900  |



|   |             |             |             |
|---|-------------|-------------|-------------|
| H | -6.46410500 | -0.94842200 | -0.77364800 |
| H | -3.91457700 | 1.37979000  | -3.33801800 |
| C | -5.58934700 | 3.18725400  | 0.20460400  |
| H | -6.47406200 | 3.22993400  | 0.84663100  |
| H | -5.86985200 | 3.53266100  | -0.79327000 |
| H | -5.26582100 | 2.14967100  | 0.11771300  |
| C | -4.95279300 | 5.52851400  | 0.83088900  |
| H | -5.38586000 | 5.82983300  | -0.12645000 |
| H | -5.72580600 | 5.62801400  | 1.59961800  |
| H | -4.13668000 | 6.21424000  | 1.06342400  |
| C | -4.67013700 | 2.62363700  | 2.89326500  |
| H | -4.11255100 | 2.27997300  | 3.76951900  |
| H | -5.55610800 | 3.16085500  | 3.24537900  |
| H | -4.99126300 | 1.74893500  | 2.32582800  |
| C | -3.14646800 | 4.61932500  | 2.91216900  |
| H | -3.90053400 | 5.24111700  | 3.40249000  |
| H | -2.53697000 | 4.14264400  | 3.68470900  |
| H | -2.49602800 | 5.26547600  | 2.31680800  |
| C | -1.29120300 | 2.53023900  | -0.63517100 |
| H | -0.57567200 | 2.05106300  | 0.04143800  |
| H | -0.74745300 | 3.33664500  | -1.13903100 |
| C | -0.69159300 | 0.33520900  | -1.96498300 |
| O | -0.76889500 | -0.20218900 | -3.05397600 |

**8<sub>a</sub>"**

|   |             |             |            |
|---|-------------|-------------|------------|
| P | 0.53246600  | -0.30785700 | 2.18337500 |
| C | 0.53032600  | 0.67059200  | 3.76365900 |
| H | -0.43454700 | 1.18491800  | 3.83270800 |
| H | 0.58629500  | -0.03018300 | 4.60292900 |
| C | 1.67372200  | 1.69567400  | 3.86578900 |
| H | 1.74973500  | 1.99953700  | 4.91603600 |
| H | 2.62634000  | 1.21482900  | 3.61950800 |
| C | 1.48385600  | 2.97174500  | 3.02667300 |
| H | 2.14709500  | 3.76656300  | 3.38209200 |
| H | 0.46050600  | 3.33761500  | 3.15998500 |
| P | 1.72236900  | 2.73362200  | 1.20440800 |
| C | -0.67381800 | -1.64501100 | 2.52744600 |
| C | -0.54440700 | -2.84877500 | 1.81897600 |
| C | -1.74060200 | -1.49512600 | 3.42398800 |
| C | -1.44632900 | -3.89031400 | 2.02129400 |
| H | 0.25961700  | -2.96556400 | 1.10256800 |
| C | -2.64807500 | -2.53863900 | 3.62158900 |
| H | -1.87424200 | -0.56897900 | 3.97243700 |
| C | -2.49747500 | -3.74042500 | 2.92908000 |
| H | -1.32560200 | -4.81385800 | 1.46499700 |
| H | -3.47088300 | -2.40869300 | 4.31786000 |
| H | -3.20160300 | -4.55156300 | 3.08850300 |
| C | 2.13704800  | -1.18350400 | 2.27502800 |

|    |             |             |             |
|----|-------------|-------------|-------------|
| C  | 2.49609200  | -1.96493800 | 3.38597200  |
| C  | 3.04516700  | -1.02393000 | 1.22455200  |
| C  | 3.75989700  | -2.54685200 | 3.44988400  |
| H  | 1.78735500  | -2.12110700 | 4.19441400  |
| C  | 4.31219300  | -1.60722600 | 1.28816800  |
| H  | 2.76464600  | -0.45243600 | 0.34914500  |
| C  | 4.67311400  | -2.35926100 | 2.40391900  |
| H  | 4.03685300  | -3.14456000 | 4.31356100  |
| H  | 4.99021100  | -1.47306800 | 0.45242700  |
| H  | 5.65946300  | -2.81050400 | 2.46095000  |
| C  | 1.46805100  | 4.40364400  | 0.50041400  |
| C  | 0.52687600  | 5.28785300  | 1.04392100  |
| C  | 2.09795700  | 4.73776400  | -0.70687400 |
| C  | 0.22875700  | 6.48753400  | 0.39707300  |
| H  | 0.01076200  | 5.04661100  | 1.96732300  |
| C  | 1.79186900  | 5.93120700  | -1.35382600 |
| H  | 2.80728600  | 4.05340800  | -1.15639100 |
| C  | 0.85773000  | 6.81065100  | -0.80444000 |
| H  | -0.50057900 | 7.16503600  | 0.83150700  |
| H  | 2.27338300  | 6.16525500  | -2.29779000 |
| H  | 0.61582100  | 7.73831000  | -1.31417600 |
| C  | 3.51054200  | 2.41497800  | 0.99753400  |
| C  | 4.46595000  | 2.70612000  | 1.98119800  |
| C  | 3.92560700  | 1.82198600  | -0.20445800 |
| C  | 5.80987100  | 2.40155700  | 1.76754900  |
| H  | 4.17139200  | 3.16733000  | 2.91774500  |
| C  | 5.27165400  | 1.53338600  | -0.42249800 |
| H  | 3.19757100  | 1.55693000  | -0.96430900 |
| C  | 6.21491500  | 1.81764400  | 0.56551000  |
| H  | 6.54049300  | 2.62186500  | 2.54040500  |
| H  | 5.56264300  | 1.05663900  | -1.35243700 |
| H  | 7.26196100  | 1.57927000  | 0.40359300  |
| Pd | 0.31450400  | 1.04847600  | 0.25554100  |
| C  | -0.83864200 | 3.25143100  | -1.50360800 |
| C  | 0.04649100  | 2.16475200  | -1.46512200 |
| C  | 0.82846400  | 1.90517200  | -2.59850700 |
| C  | 0.75934800  | 2.73627900  | -3.72148600 |
| C  | -0.11388700 | 3.82496500  | -3.74080700 |
| C  | -0.92119300 | 4.07440100  | -2.62953000 |
| H  | -1.46056000 | 3.48421200  | -0.64349300 |
| H  | 1.38433700  | 2.52043200  | -4.58463600 |
| H  | -0.17026600 | 4.46862200  | -4.61464100 |
| H  | -1.60723000 | 4.91773200  | -2.63097300 |
| I  | 3.47108700  | -1.20802200 | -2.59863300 |
| H  | 1.49232700  | 1.04566300  | -2.62038600 |
| Cu | 1.38605300  | -2.25479400 | -1.56900600 |
| B  | -4.38305600 | 1.15843000  | 0.50228600  |
| C  | -2.42846300 | 0.10802600  | -0.70821700 |

|   |             |             |             |
|---|-------------|-------------|-------------|
| C | -1.41111700 | -4.19936400 | -2.06677600 |
| O | -4.93061500 | 1.88055000  | -0.52932900 |
| O | -5.32268700 | 0.68016400  | 1.38238100  |
| C | 0.84425200  | -4.06991600 | -1.01686800 |
| N | -0.30279300 | -4.74922400 | -1.29102100 |
| N | 1.59488500  | -4.96433700 | -0.31365700 |
| C | -0.26735800 | -6.03633400 | -0.77643300 |
| C | 0.93257300  | -6.17022300 | -0.14962400 |
| C | -6.34597800 | 2.04247700  | -0.24880400 |
| C | -6.62339200 | 0.86539600  | 0.75543100  |
| C | 2.90243700  | -4.64056500 | 0.24262500  |
| H | -1.07929500 | -6.73385500 | -0.90788600 |
| H | 1.36298300  | -7.00140000 | 0.38594600  |
| H | 3.55081400  | -5.51798800 | 0.18730700  |
| H | 2.81245700  | -4.31606000 | 1.28260100  |
| H | 3.33097800  | -3.83016300 | -0.34774200 |
| H | -1.34077100 | -3.11317300 | -2.04962000 |
| H | -2.35792400 | -4.49543100 | -1.61415400 |
| H | -1.36743900 | -4.56104900 | -3.09824800 |
| C | -3.28583500 | -1.10410800 | -0.99771000 |
| C | -3.61022200 | -2.01239400 | 0.01788000  |
| C | -4.41221100 | -3.12161800 | -0.24482300 |
| C | -4.90529600 | -3.34467300 | -1.53225200 |
| C | -3.77213100 | -1.34456400 | -2.28853500 |
| C | -4.57670900 | -2.45350900 | -2.55659400 |
| H | -3.24699800 | -1.84780800 | 1.02372500  |
| H | -4.95260400 | -2.61677700 | -3.56254300 |
| H | -2.54109700 | 0.82068600  | -1.53599600 |
| H | -4.65603200 | -3.80646900 | 0.56240500  |
| H | -5.54062500 | -4.20182700 | -1.73617800 |
| H | -3.52424000 | -0.64829100 | -3.08450200 |
| C | -7.11111900 | 1.95803700  | -1.56418100 |
| H | -8.19119900 | 1.98814400  | -1.38771700 |
| H | -6.84544600 | 2.80798700  | -2.19863800 |
| H | -6.86864200 | 1.04288200  | -2.10616000 |
| C | -6.51486400 | 3.42774100  | 0.38117100  |
| H | -6.10353600 | 4.17713900  | -0.29982900 |
| H | -7.56745000 | 3.66346300  | 0.56286200  |
| H | -5.97336400 | 3.49569200  | 1.32870100  |
| C | -6.96280000 | -0.45336200 | 0.05434700  |
| H | -6.91556900 | -1.26356800 | 0.78576100  |
| H | -7.96861700 | -0.42945700 | -0.37516500 |
| H | -6.24610900 | -0.68063600 | -0.73724400 |
| C | -7.64804200 | 1.17017800  | 1.84097300  |
| H | -8.62648400 | 1.38633400  | 1.39985200  |
| H | -7.75609700 | 0.30147900  | 2.49627300  |
| H | -7.34508000 | 2.02103200  | 2.45332700  |
| C | -2.85077000 | 0.84567500  | 0.58240400  |

|   |             |             |             |
|---|-------------|-------------|-------------|
| H | -2.62618800 | 0.23805600  | 1.46280300  |
| H | -2.25234300 | 1.76028700  | 0.66127900  |
| C | -0.91742500 | -0.20373200 | -0.75000900 |
| O | -0.52750200 | -1.16069900 | -1.41514000 |

**11**

|   |             |             |             |
|---|-------------|-------------|-------------|
| P | 0.69232700  | -2.15168700 | 0.66726600  |
| C | 1.42159200  | -2.54156600 | 2.32857100  |
| H | 0.77147100  | -2.04673800 | 3.05865300  |
| H | 1.32512100  | -3.61636100 | 2.51448100  |
| C | 2.88009600  | -2.09294200 | 2.53453300  |
| H | 3.24999700  | -2.58933800 | 3.43913100  |
| H | 3.50745600  | -2.45623400 | 1.71327200  |
| C | 3.09386200  | -0.57928600 | 2.71383400  |
| H | 4.08167400  | -0.40217500 | 3.15210800  |
| H | 2.34912700  | -0.17663700 | 3.40981200  |
| P | 2.96288800  | 0.38100100  | 1.12685500  |
| C | -1.00106800 | -2.83255400 | 0.83596900  |
| C | -1.45612100 | -3.92350800 | 0.08540900  |
| C | -1.89014000 | -2.17972900 | 1.70365900  |
| C | -2.77801100 | -4.35542200 | 0.20697000  |
| H | -0.78225600 | -4.42675400 | -0.59899500 |
| C | -3.20649700 | -2.61629100 | 1.82889200  |
| H | -1.55999700 | -1.30867300 | 2.26303300  |
| C | -3.65295100 | -3.70678900 | 1.07902700  |
| H | -3.12368800 | -5.19819300 | -0.38406600 |
| H | -3.88730800 | -2.08273000 | 2.48198800  |
| H | -4.68127700 | -4.04390600 | 1.16794300  |
| C | 1.54194400  | -3.27409200 | -0.50369800 |
| C | 2.34700100  | -4.34556100 | -0.09662900 |
| C | 1.41851000  | -2.98885700 | -1.87549200 |
| C | 3.03325200  | -5.11196500 | -1.03957300 |
| H | 2.45351900  | -4.58616700 | 0.95531000  |
| C | 2.09338200  | -3.76889700 | -2.81345800 |
| H | 0.80807400  | -2.15086600 | -2.20374900 |
| C | 2.90841600  | -4.82493600 | -2.39879800 |
| H | 3.66469800  | -5.93179500 | -0.71048100 |
| H | 1.98901700  | -3.54198100 | -3.87022000 |
| H | 3.44353200  | -5.42155900 | -3.13164900 |
| C | 3.54046900  | 2.05568200  | 1.57265600  |
| C | 3.65782200  | 2.49921700  | 2.89677400  |
| C | 3.81574300  | 2.94963800  | 0.52432500  |
| C | 4.05324500  | 3.81036700  | 3.16897800  |
| H | 3.44444000  | 1.83062000  | 3.72399000  |
| C | 4.21278600  | 4.25445600  | 0.80076500  |
| H | 3.69710200  | 2.63114500  | -0.50538700 |
| C | 4.33266600  | 4.68896300  | 2.12258300  |
| H | 4.14290400  | 4.14191600  | 4.19936700  |

|    |             |             |             |
|----|-------------|-------------|-------------|
| H  | 4.40780200  | 4.93607900  | -0.02091000 |
| H  | 4.63636300  | 5.70960400  | 2.33568700  |
| C  | 4.37516500  | -0.30280000 | 0.17780700  |
| C  | 5.69524100  | -0.19846200 | 0.64080900  |
| C  | 4.11686300  | -0.99351800 | -1.01138400 |
| C  | 6.73490100  | -0.79650700 | -0.06762300 |
| H  | 5.90724900  | 0.36087800  | 1.54776800  |
| C  | 5.15734200  | -1.59965700 | -1.71670600 |
| H  | 3.09821500  | -1.05488800 | -1.37441800 |
| C  | 6.46561800  | -1.50383800 | -1.24383600 |
| H  | 7.75550500  | -0.71140000 | 0.29396000  |
| H  | 4.93816300  | -2.14768800 | -2.62753200 |
| H  | 7.27811500  | -1.97307900 | -1.79091300 |
| Pd | 0.90269400  | 0.07530100  | -0.07872200 |
| C  | -0.73544400 | -0.09993000 | -1.27260700 |
| O  | -0.68320800 | -0.56431500 | -2.39892200 |
| C  | 1.03743900  | 1.93310600  | -0.97443300 |
| C  | 1.53653500  | 2.03178000  | -2.28064500 |
| C  | 0.74204100  | 3.12147100  | -0.29282000 |
| C  | 1.76098200  | 3.27639700  | -2.87785300 |
| H  | 1.73655000  | 1.12689100  | -2.84968800 |
| C  | 0.94134700  | 4.36663500  | -0.89121000 |
| H  | 0.34241000  | 3.08420600  | 0.71601600  |
| C  | 1.46245500  | 4.45052600  | -2.18357800 |
| H  | 2.15736800  | 3.32826600  | -3.88957600 |
| H  | 0.68982600  | 5.27259200  | -0.34565000 |
| H  | 1.62376400  | 5.41929500  | -2.64897600 |
| B  | -4.59771000 | -0.23518800 | -0.46502600 |
| C  | -2.08142700 | 0.32973100  | -0.66417700 |
| O  | -4.67525700 | 0.09584900  | 0.87252800  |
| O  | -5.83493800 | -0.32361800 | -1.05611700 |
| C  | -6.04844600 | 0.47976800  | 1.14620300  |
| C  | -6.83044600 | -0.25213400 | -0.00308000 |
| C  | -2.29019100 | 1.81676600  | -0.88512000 |
| C  | -2.11615900 | 2.38819900  | -2.15144100 |
| C  | -2.30099700 | 3.75525400  | -2.34220200 |
| C  | -2.67437600 | 4.57116400  | -1.27226800 |
| C  | -2.66437100 | 2.64074100  | 0.18117200  |
| C  | -2.86058600 | 4.00881700  | -0.00950600 |
| H  | -1.79929300 | 1.76016200  | -2.97727700 |
| H  | -3.15016900 | 4.63543800  | 0.82976600  |
| H  | -2.00256900 | 0.16973100  | 0.41386400  |
| H  | -2.13642500 | 4.18761700  | -3.32448100 |
| H  | -2.81203000 | 5.63818900  | -1.42143300 |
| H  | -2.80984900 | 2.19785100  | 1.16145400  |
| C  | -6.11551200 | 2.00611400  | 1.04128100  |
| H  | -7.11717400 | 2.37983800  | 1.27265600  |
| H  | -5.40972400 | 2.44321100  | 1.75154400  |

|   |             |             |             |
|---|-------------|-------------|-------------|
| H | -5.83110400 | 2.34579200  | 0.04270200  |
| C | -6.40721000 | 0.03058200  | 2.55786200  |
| H | -5.78573400 | 0.56543000  | 3.28150400  |
| H | -7.45559700 | 0.25285000  | 2.78145800  |
| H | -6.24353500 | -1.03986000 | 2.69394400  |
| C | -8.04771600 | 0.49572900  | -0.53320700 |
| H | -8.51126200 | -0.08091500 | -1.33823600 |
| H | -8.79186700 | 0.63684200  | 0.25750900  |
| H | -7.77091300 | 1.47221900  | -0.93291200 |
| C | -7.20162200 | -1.69687200 | 0.34702500  |
| H | -7.99785300 | -1.74157500 | 1.09553000  |
| H | -7.54699000 | -2.20144000 | -0.55881100 |
| H | -6.33166600 | -2.24011100 | 0.72525200  |
| C | -3.25185200 | -0.51210900 | -1.21028800 |
| H | -3.36377200 | -0.34675100 | -2.28546700 |
| H | -3.00722000 | -1.57708600 | -1.09506600 |

## TS22

|   |             |             |             |
|---|-------------|-------------|-------------|
| P | -1.11618200 | -1.39477700 | 1.43472600  |
| C | -0.39868500 | -2.53273800 | 2.72142000  |
| H | -0.14270600 | -1.88172900 | 3.56552600  |
| H | -1.18304400 | -3.20608100 | 3.08490300  |
| C | 0.83540700  | -3.34550600 | 2.29405400  |
| H | 1.00556100  | -4.10867200 | 3.06286900  |
| H | 0.63068000  | -3.89185800 | 1.36744400  |
| C | 2.14101400  | -2.54731500 | 2.13891300  |
| H | 2.99484100  | -3.23214900 | 2.17593200  |
| H | 2.25048900  | -1.84703800 | 2.97426400  |
| P | 2.24208200  | -1.56651900 | 0.56271000  |
| C | -2.57785000 | -0.77087700 | 2.35941300  |
| C | -3.64847200 | -1.60122500 | 2.71952100  |
| C | -2.60033500 | 0.57635200  | 2.73726100  |
| C | -4.71716600 | -1.09391700 | 3.45685800  |
| H | -3.65432200 | -2.64093200 | 2.40557800  |
| C | -3.66665000 | 1.08383700  | 3.48149900  |
| H | -1.78665400 | 1.22745900  | 2.43521200  |
| C | -4.72613200 | 0.24977800  | 3.84151900  |
| H | -5.54530100 | -1.74272000 | 3.72671800  |
| H | -3.67273600 | 2.13038700  | 3.77112700  |
| H | -5.55977400 | 0.64539100  | 4.41392500  |
| C | -1.84273200 | -2.53965900 | 0.19382000  |
| C | -1.99423600 | -3.91866700 | 0.38488100  |
| C | -2.19285300 | -1.98660600 | -1.04951800 |
| C | -2.47467200 | -4.73075000 | -0.64481000 |
| H | -1.72914200 | -4.37501100 | 1.33230100  |
| C | -2.68105200 | -2.79589900 | -2.07275900 |
| H | -2.07674100 | -0.91943900 | -1.20325800 |
| C | -2.81698700 | -4.17259100 | -1.87544300 |

|    |             |             |             |
|----|-------------|-------------|-------------|
| H  | -2.57538800 | -5.80004600 | -0.48411800 |
| H  | -2.94039900 | -2.35515800 | -3.03068600 |
| H  | -3.18301500 | -4.80547200 | -2.67826500 |
| C  | 3.99462100  | -1.05896100 | 0.49011300  |
| C  | 4.78340600  | -0.90763600 | 1.63803800  |
| C  | 4.51753800  | -0.67085000 | -0.75429400 |
| C  | 6.07364100  | -0.38411300 | 1.54311400  |
| H  | 4.39734000  | -1.18871900 | 2.61226400  |
| C  | 5.80345200  | -0.14879700 | -0.84459600 |
| H  | 3.90193600  | -0.75271300 | -1.64434700 |
| C  | 6.58488000  | -0.00161600 | 0.30391400  |
| H  | 6.67580900  | -0.27171200 | 2.44009100  |
| H  | 6.18725600  | 0.16620900  | -1.80938600 |
| H  | 7.58417600  | 0.41689200  | 0.23241600  |
| C  | 2.12634300  | -2.87933200 | -0.71221600 |
| C  | 2.97868900  | -3.99379800 | -0.70402100 |
| C  | 1.12563600  | -2.78514700 | -1.68649900 |
| C  | 2.81251700  | -5.01027500 | -1.64179800 |
| H  | 3.77585900  | -4.06081700 | 0.03099500  |
| C  | 0.95822700  | -3.80590100 | -2.62319700 |
| H  | 0.49435400  | -1.90507000 | -1.71069400 |
| C  | 1.79608000  | -4.92000100 | -2.59808500 |
| H  | 3.47360600  | -5.87197200 | -1.62960000 |
| H  | 0.16984600  | -3.72728500 | -3.36468700 |
| H  | 1.66530400  | -5.71634700 | -3.32508100 |
| Pd | 0.51375800  | -0.03315600 | 0.29792400  |
| C  | 1.41781800  | 1.10751000  | -1.16714900 |
| O  | 1.24041400  | 0.63876300  | -2.29577700 |
| C  | 2.65268400  | 1.89537900  | -0.86157200 |
| C  | 3.08549000  | 2.12745500  | 0.44725300  |
| C  | 3.39708500  | 2.40783200  | -1.93132200 |
| C  | 4.24235200  | 2.86091900  | 0.68639100  |
| H  | 2.50768900  | 1.71994000  | 1.26928000  |
| C  | 4.55305800  | 3.14703400  | -1.69427700 |
| H  | 3.04914400  | 2.20910100  | -2.93964300 |
| C  | 4.97818400  | 3.37512500  | -0.38376600 |
| H  | 4.57241800  | 3.03213900  | 1.70632500  |
| H  | 5.12437900  | 3.54500500  | -2.52851800 |
| H  | 5.88017400  | 3.95070700  | -0.19595200 |
| B  | -2.61170400 | 1.91112900  | -1.63799700 |
| C  | -0.29920100 | 2.12200500  | -0.49240400 |
| O  | -3.16440100 | 1.21615400  | -0.58116000 |
| O  | -3.55714400 | 2.31115900  | -2.55294700 |
| C  | -4.61011700 | 1.34802700  | -0.67956900 |
| C  | -4.80548200 | 1.65536200  | -2.20621500 |
| C  | 0.26190200  | 3.36859100  | 0.07583300  |
| C  | 0.77069600  | 4.41047500  | -0.71769100 |
| C  | 1.35160700  | 5.53697500  | -0.14048100 |

|   |             |             |             |
|---|-------------|-------------|-------------|
| C | 1.43838300  | 5.66044100  | 1.24730200  |
| C | 0.35282400  | 3.51365100  | 1.47178300  |
| C | 0.93042300  | 4.63856400  | 2.05238500  |
| H | 0.74235400  | 4.32176000  | -1.79864900 |
| H | 0.98795400  | 4.71745900  | 3.13488200  |
| H | -0.92881500 | 1.66899500  | 0.28292100  |
| H | 1.75085600  | 6.31904400  | -0.78035300 |
| H | 1.89661200  | 6.53758700  | 1.69414500  |
| H | -0.00972600 | 2.70612900  | 2.10448000  |
| C | -5.00393100 | 2.51963400  | 0.22374200  |
| H | -6.08891400 | 2.65513600  | 0.25476000  |
| H | -4.65122600 | 2.31269200  | 1.23585200  |
| H | -4.54458600 | 3.45129100  | -0.11763700 |
| C | -5.26151900 | 0.06004000  | -0.19279500 |
| H | -5.09129300 | -0.05925500 | 0.87826500  |
| H | -6.34253400 | 0.09115600  | -0.36577900 |
| H | -4.85010500 | -0.81449500 | -0.69853000 |
| C | -5.95940500 | 2.59528300  | -2.53280800 |
| H | -6.00370400 | 2.76123200  | -3.61267500 |
| H | -6.91316200 | 2.16153100  | -2.21502800 |
| H | -5.83523700 | 3.56375900  | -2.04670200 |
| C | -4.89148300 | 0.38933100  | -3.06426400 |
| H | -5.84109900 | -0.13367600 | -2.92028100 |
| H | -4.80235100 | 0.66876200  | -4.11710900 |
| H | -4.07878400 | -0.29965800 | -2.82322600 |
| C | -1.07901600 | 2.15559600  | -1.79946100 |
| H | -0.91560000 | 3.09228900  | -2.34302300 |
| H | -0.68194700 | 1.37820700  | -2.47432600 |

**COM<sub>5-7a</sub>**

|    |             |             |             |
|----|-------------|-------------|-------------|
| Cu | 1.97842400  | -0.89773900 | -1.52727200 |
| B  | -0.61403000 | 2.59955900  | -0.18282200 |
| C  | -2.28532900 | 1.23072800  | -1.52938700 |
| C  | 3.29041300  | 1.97025700  | -2.27405100 |
| O  | 0.70916400  | 2.22354600  | -0.11483300 |
| O  | -1.10163300 | 3.00966500  | 1.04012100  |
| C  | 3.65840000  | -0.16548700 | -1.03177700 |
| N  | 4.05655100  | 1.08378800  | -1.39600200 |
| N  | 4.63584000  | -0.59966400 | -0.18997100 |
| C  | 5.25418400  | 1.42392800  | -0.78874700 |
| C  | 5.62208400  | 0.36112300  | -0.02456600 |
| C  | 1.19322600  | 2.55528300  | 1.21601500  |
| C  | -0.13445900 | 2.61249300  | 2.04695300  |
| C  | 4.61092800  | -1.88740100 | 0.48694900  |
| H  | 3.73877300  | -2.43729500 | 0.13401100  |
| H  | 4.53276500  | -1.74643400 | 1.56887600  |
| H  | 5.51720300  | -2.45504600 | 0.25988800  |



|   |             |             |             |
|---|-------------|-------------|-------------|
| H | 2.37069700  | 1.46724700  | -2.58165400 |
| H | 3.89339500  | 2.22875000  | -3.14842300 |
| H | 3.01566000  | 2.87562200  | -1.72981300 |
| C | -3.68092300 | 1.20896900  | -1.02179300 |
| C | -4.66603300 | 0.45991800  | -1.68629700 |
| C | -5.96244300 | 0.37261000  | -1.18466500 |
| C | -6.30380500 | 1.03353900  | -0.00255000 |
| C | -4.04342200 | 1.89516800  | 0.14945600  |
| C | -5.33895300 | 1.79712000  | 0.65735800  |
| H | -4.40348100 | -0.05076500 | -2.60688700 |
| H | -5.59560600 | 2.32085200  | 1.57415000  |
| H | -6.70944400 | -0.20710000 | -1.71990400 |
| H | -7.31359600 | 0.96557200  | 0.39151000  |
| H | -3.29956600 | 2.47924700  | 0.67958500  |
| C | 1.88844800  | 3.91553900  | 1.10867900  |
| H | 2.33613800  | 4.21460700  | 2.06079800  |
| H | 2.68490400  | 3.85012200  | 0.36285900  |
| H | 1.18715100  | 4.69236500  | 0.79292500  |
| C | 2.18146400  | 1.48784600  | 1.67169300  |
| H | 3.10799100  | 1.56755100  | 1.09936600  |
| H | 2.42634400  | 1.62359600  | 2.73050800  |
| H | 1.77612600  | 0.48589900  | 1.52701300  |
| C | -0.15422800 | 3.63280900  | 3.17706000  |
| H | -1.12657300 | 3.60708900  | 3.67643600  |
| H | 0.61511200  | 3.40133100  | 3.92078600  |
| H | 0.00886900  | 4.64610000  | 2.80664700  |
| C | -0.57269600 | 1.23519900  | 2.54847800  |
| H | 0.06755000  | 0.87110400  | 3.35626000  |
| H | -1.59866500 | 1.30412300  | 2.92011000  |
| H | -0.55121100 | 0.50642200  | 1.73597400  |
| C | -1.51369000 | 2.54301200  | -1.47080000 |
| H | -0.87851700 | 2.60264300  | -2.35516300 |
| H | -2.22027300 | 3.37889700  | -1.46123700 |
| C | -1.73777000 | 0.07307300  | -1.95505700 |
| O | 0.18366100  | -1.24422800 | -1.96350600 |
| H | -2.30681900 | -0.84541900 | -1.87474100 |
| H | 6.48390300  | 0.20547900  | 0.60455100  |
| H | 5.73504600  | 2.37479500  | -0.95427900 |
| C | -0.31136000 | -0.10050500 | -2.34303700 |
| O | 0.33797800  | 0.79519800  | -2.91523800 |
| C | -1.57238900 | -3.32475500 | -0.41776200 |
| C | -2.86273100 | -3.34508800 | -0.95005700 |
| C | -3.87662500 | -2.57127800 | -0.38365800 |
| C | -3.60507500 | -1.77074900 | 0.72534000  |
| C | -2.32623500 | -1.75742900 | 1.28521700  |
| C | -1.32620700 | -2.53589700 | 0.70318200  |
| H | -0.77693700 | -3.89595700 | -0.87814800 |
| H | -3.06462200 | -3.95713700 | -1.82394000 |

|   |             |             |             |
|---|-------------|-------------|-------------|
| H | -4.87112800 | -2.57060400 | -0.81631300 |
| H | -4.38028000 | -1.13771700 | 1.14433000  |
| H | -2.11744800 | -1.14514400 | 2.15327900  |
| I | 0.62233300  | -2.52729500 | 1.54928400  |

### TS23

|    |             |             |             |
|----|-------------|-------------|-------------|
| Cu | 2.07887900  | -0.63324300 | -0.65353100 |
| B  | -1.40592700 | 2.60184200  | -0.34057400 |
| C  | -2.81771100 | 0.73045900  | -1.27324600 |
| C  | 2.51959200  | 2.20129700  | -2.42990000 |
| O  | -0.08966900 | 2.98761500  | -0.42744400 |
| O  | -1.87746900 | 2.61253900  | 0.95091300  |
| C  | 3.53138600  | 0.63537300  | -0.76536100 |
| N  | 3.58229700  | 1.76274200  | -1.52662200 |
| N  | 4.68794500  | 0.66952300  | -0.04331900 |
| C  | 4.73592000  | 2.48631800  | -1.27907000 |
| C  | 5.43739500  | 1.79533300  | -0.34192300 |
| C  | 0.31610300  | 3.45042200  | 0.89289100  |
| C  | -0.72153600 | 2.73346600  | 1.82418700  |
| C  | 5.08331500  | -0.34281700 | 0.92704000  |
| H  | 4.31972700  | -1.12034100 | 0.94150000  |
| H  | 5.16651500  | 0.10124400  | 1.92286100  |
| H  | 6.04383000  | -0.78131300 | 0.64378700  |
| H  | 1.81115300  | 1.38545000  | -2.56709600 |
| H  | 2.95834600  | 2.49321300  | -3.38711500 |
| H  | 1.97556000  | 3.04005600  | -1.99061900 |
| C  | -4.22882500 | 0.58219200  | -0.84135000 |
| C  | -4.96855100 | -0.56174300 | -1.18810600 |
| C  | -6.28370700 | -0.71925200 | -0.76030000 |
| C  | -6.88903400 | 0.26236400  | 0.02733200  |
| C  | -4.85101800 | 1.56539800  | -0.05423300 |
| C  | -6.16556400 | 1.40206100  | 0.38001100  |
| H  | -4.50883800 | -1.32113900 | -1.81158800 |
| H  | -6.62424100 | 2.16719400  | 0.99972800  |
| H  | -6.84015800 | -1.60628100 | -1.04891700 |
| H  | -7.91565700 | 0.14073700  | 0.35987400  |
| H  | -4.28808400 | 2.43812700  | 0.25623400  |
| C  | 0.17113700  | 4.97409800  | 0.88806700  |
| H  | 0.52582900  | 5.41529000  | 1.82382600  |
| H  | 0.76397200  | 5.38394600  | 0.06607000  |
| H  | -0.87054100 | 5.26944800  | 0.73654700  |
| C  | 1.76523400  | 3.04913900  | 1.13636200  |
| H  | 2.42808900  | 3.60302300  | 0.46600100  |
| H  | 2.05800100  | 3.28194100  | 2.16537700  |
| H  | 1.91786100  | 1.98486100  | 0.95664100  |
| C  | -1.12373400 | 3.51371700  | 3.06810600  |
| H  | -1.86068700 | 2.94131900  | 3.63778900  |
| H  | -0.25583000 | 3.68708900  | 3.71232800  |

|   |             |             |             |
|---|-------------|-------------|-------------|
| H | -1.56764400 | 4.47683300  | 2.81123000  |
| C | -0.30603000 | 1.30501400  | 2.18896100  |
| H | 0.51870700  | 1.29275300  | 2.90684500  |
| H | -1.16462700 | 0.79827600  | 2.63628100  |
| H | -0.00641500 | 0.74129400  | 1.30173000  |
| C | -2.29054700 | 2.12690700  | -1.55359000 |
| H | -1.67939700 | 2.11145300  | -2.45579500 |
| H | -3.12793900 | 2.81411900  | -1.70990100 |
| C | -2.03225700 | -0.36936300 | -1.29788600 |
| O | 0.18509500  | -1.13600700 | -0.84317800 |
| H | -2.44089500 | -1.31419000 | -0.97208800 |
| H | 6.38997400  | 1.99674700  | 0.12165000  |
| H | 4.95747100  | 3.41040800  | -1.78878700 |
| C | -0.58453900 | -0.33424100 | -1.58496400 |
| O | -0.06894500 | 0.41822300  | -2.41090500 |
| C | -1.04209800 | -3.53985500 | -0.77147200 |
| C | -2.33694700 | -4.03166200 | -0.58100600 |
| C | -3.11787500 | -3.60400000 | 0.49588400  |
| C | -2.58719800 | -2.68503700 | 1.40449300  |
| C | -1.29541400 | -2.17887300 | 1.24249600  |
| C | -0.55712600 | -2.62938100 | 0.15695800  |
| H | -0.43524300 | -3.85113500 | -1.61221700 |
| H | -2.73281600 | -4.74935100 | -1.29421100 |
| H | -4.12701800 | -3.98000600 | 0.62509400  |
| H | -3.18131800 | -2.34170200 | 2.24641800  |
| H | -0.87938900 | -1.46302800 | 1.93719800  |
| I | 1.88995900  | -3.02038300 | 0.78095900  |

9<sub>a</sub>'

|    |             |             |             |
|----|-------------|-------------|-------------|
| Cu | 1.61162500  | -1.74622700 | 0.64677500  |
| B  | 0.13329800  | 2.74293500  | -0.98239800 |
| C  | -2.12232800 | 1.52889400  | -0.96072700 |
| C  | 2.07418500  | -2.26241900 | -2.73533400 |
| O  | 1.35425700  | 2.92936900  | -1.57113500 |
| O  | 0.13559200  | 2.96874900  | 0.36879700  |
| C  | 3.09791200  | -1.53708000 | -0.58084400 |
| N  | 3.16532600  | -1.73710600 | -1.92205000 |
| N  | 4.31132400  | -1.00353000 | -0.26229300 |
| C  | 4.38412300  | -1.32395500 | -2.43443800 |
| C  | 5.11249200  | -0.86204900 | -1.38487300 |
| C  | 2.25794600  | 3.43560900  | -0.55179500 |
| C  | 1.52595900  | 3.04465900  | 0.78838000  |
| C  | 4.72173300  | -0.65307100 | 1.09022800  |
| H  | 3.87830000  | -0.82735400 | 1.75844500  |
| H  | 5.00608700  | 0.40113000  | 1.13476100  |
| H  | 5.56611800  | -1.27293400 | 1.40361400  |
| H  | 1.34085200  | -2.72281100 | -2.07757800 |
| H  | 2.47054000  | -3.00272400 | -3.43453400 |

|   |             |             |             |
|---|-------------|-------------|-------------|
| H | 1.58176500  | -1.44887400 | -3.26911600 |
| C | -3.29740300 | 2.18657900  | -0.34760400 |
| C | -4.53922300 | 1.53301100  | -0.28298200 |
| C | -5.63687300 | 2.15260900  | 0.30962000  |
| C | -5.51141700 | 3.43230000  | 0.85310300  |
| C | -3.18482600 | 3.47877100  | 0.19251800  |
| C | -4.28117700 | 4.08983600  | 0.79609200  |
| H | -4.64477000 | 0.54635500  | -0.72322300 |
| H | -4.17359700 | 5.08058000  | 1.22755600  |
| H | -6.59250500 | 1.63795700  | 0.34206300  |
| H | -6.36691900 | 3.91432000  | 1.31660800  |
| H | -2.22267400 | 3.97859300  | 0.18197800  |
| C | 2.36331300  | 4.94698400  | -0.76921000 |
| H | 3.07614800  | 5.40611900  | -0.07833900 |
| H | 2.70028100  | 5.13556300  | -1.79187600 |
| H | 1.39174100  | 5.43091800  | -0.63828600 |
| C | 3.61558200  | 2.76978500  | -0.75268200 |
| H | 4.04281700  | 3.08716900  | -1.70793800 |
| H | 4.31061500  | 3.05677200  | 0.04371000  |
| H | 3.51924200  | 1.68369500  | -0.76914000 |
| C | 1.63753200  | 4.06923900  | 1.91059500  |
| H | 1.08051800  | 3.71449200  | 2.78153200  |
| H | 2.68252400  | 4.20528600  | 2.20738500  |
| H | 1.22883400  | 5.03727300  | 1.61609100  |
| C | 1.89664500  | 1.65264900  | 1.29857300  |
| H | 2.90757900  | 1.63789600  | 1.71555500  |
| H | 1.19493700  | 1.35118600  | 2.07869100  |
| H | 1.82914500  | 0.91243300  | 0.49849900  |
| C | -1.18127500 | 2.38069000  | -1.77492200 |
| H | -0.86430900 | 1.85028900  | -2.67639600 |
| H | -1.69371500 | 3.29583300  | -2.09080700 |
| C | -1.93974000 | 0.20174900  | -0.75819000 |
| O | -0.89548300 | -1.89573600 | -1.37434200 |
| H | -2.64439200 | -0.35327900 | -0.15308900 |
| H | 6.11115600  | -0.45847400 | -1.33765800 |
| H | 4.62227400  | -1.39465500 | -3.48365200 |
| C | -0.78289600 | -0.52756700 | -1.26523800 |
| O | 0.29136500  | -0.03818900 | -1.57584000 |
| C | -3.09777400 | -2.30799900 | -2.27124500 |
| C | -4.32332800 | -2.96734000 | -2.17620300 |
| C | -4.57646000 | -3.82861000 | -1.10599100 |
| C | -3.60034800 | -4.02941500 | -0.12789200 |
| C | -2.37208300 | -3.37141900 | -0.20648300 |
| C | -2.14089400 | -2.51550000 | -1.27842700 |
| H | -2.87948300 | -1.63893300 | -3.09687100 |
| H | -5.07716900 | -2.81063200 | -2.94174600 |
| H | -5.53094200 | -4.34085900 | -1.03570500 |
| H | -3.79482600 | -4.69326800 | 0.70869100  |

|   |             |             |            |
|---|-------------|-------------|------------|
| H | -1.60863900 | -3.47928000 | 0.55573100 |
| I | 0.00245600  | -1.82687900 | 2.51994200 |

COM<sub>4-6b</sub>

|   |             |             |             |
|---|-------------|-------------|-------------|
| P | -0.00862500 | -1.07819800 | 1.73812000  |
| C | 0.23340600  | -2.86619300 | 2.18391000  |
| H | 0.98039300  | -3.27793300 | 1.49665000  |
| H | 0.66229000  | -2.92396800 | 3.18912300  |
| C | -1.05703600 | -3.69663100 | 2.14661400  |
| H | -0.82762900 | -4.68311800 | 2.56725600  |
| H | -1.79170000 | -3.24227200 | 2.81663100  |
| C | -1.67113700 | -3.93026400 | 0.75910800  |
| H | -2.44016100 | -4.70855600 | 0.81395200  |
| H | -0.90220400 | -4.30663200 | 0.07535800  |
| P | -2.41108400 | -2.47491700 | -0.13073800 |
| C | 1.47001900  | -0.27709500 | 2.48152400  |
| C | 1.41779900  | 1.11102800  | 2.68379700  |
| C | 2.63561200  | -0.97651500 | 2.82163900  |
| C | 2.50710400  | 1.78601600  | 3.22618100  |
| H | 0.52758000  | 1.65557500  | 2.40312200  |
| C | 3.72762600  | -0.29247800 | 3.36392900  |
| H | 2.72498300  | -2.03993500 | 2.63854900  |
| C | 3.66656400  | 1.08557700  | 3.57110700  |
| H | 2.44115100  | 2.85858000  | 3.37764500  |
| H | 4.62488000  | -0.84406400 | 3.62886800  |
| H | 4.51622500  | 1.61060400  | 3.99781100  |
| C | -1.33085200 | -0.54915300 | 2.89370800  |
| C | -1.32516400 | -0.93447800 | 4.24368300  |
| C | -2.36115100 | 0.26839800  | 2.41952800  |
| C | -2.35212700 | -0.52786500 | 5.09180500  |
| H | -0.51572700 | -1.54433900 | 4.63463400  |
| C | -3.37719700 | 0.69431200  | 3.27431400  |
| H | -2.35290400 | 0.59966800  | 1.39055600  |
| C | -3.38105700 | 0.28585500  | 4.60595600  |
| H | -2.34600400 | -0.83525600 | 6.13358900  |
| H | -4.14701500 | 1.35118600  | 2.88682100  |
| H | -4.17505700 | 0.60936700  | 5.27267300  |
| C | -2.90270200 | -3.28985400 | -1.69254100 |
| C | -1.87786800 | -3.70716300 | -2.55603500 |
| C | -4.23588800 | -3.47454400 | -2.07079300 |
| C | -2.18337000 | -4.31434000 | -3.77097500 |
| H | -0.84011800 | -3.52037000 | -2.29138500 |
| C | -4.53929800 | -4.07036200 | -3.29620100 |
| H | -5.03498200 | -3.14490200 | -1.41627000 |
| C | -3.51736000 | -4.49308500 | -4.14564400 |
| H | -1.38264200 | -4.62736900 | -4.43415400 |
| H | -5.57749500 | -4.20212100 | -3.58583300 |

|    |             |             |             |
|----|-------------|-------------|-------------|
| H  | -3.75708900 | -4.95374900 | -5.09917000 |
| C  | -3.96735600 | -2.08534700 | 0.73679300  |
| C  | -4.40775400 | -2.78379800 | 1.86832400  |
| C  | -4.70875900 | -0.98224700 | 0.28158600  |
| C  | -5.55594300 | -2.37360800 | 2.54610800  |
| H  | -3.86106800 | -3.64395200 | 2.23556400  |
| C  | -5.86358000 | -0.58740500 | 0.95110200  |
| H  | -4.36876800 | -0.42539100 | -0.58382400 |
| C  | -6.28453500 | -1.27518700 | 2.09135000  |
| H  | -5.87820500 | -2.91386700 | 3.43106400  |
| H  | -6.42209400 | 0.27093700  | 0.59093000  |
| H  | -7.17463900 | -0.95437300 | 2.62398400  |
| Pd | -0.90096200 | -0.70470200 | -0.48939400 |
| C  | -2.19451500 | -0.49753700 | -3.29153000 |
| C  | -2.08521300 | 0.03054100  | -2.00111600 |
| C  | -2.88115300 | 1.13751300  | -1.66530300 |
| C  | -3.74577400 | 1.71472100  | -2.60389300 |
| C  | -3.85009900 | 1.17394400  | -3.88566200 |
| C  | -3.07278300 | 0.06260100  | -4.22280200 |
| H  | -1.58803100 | -1.34220900 | -3.58665400 |
| H  | -4.33307600 | 2.58275800  | -2.31680000 |
| H  | -4.52929200 | 1.60999300  | -4.61315800 |
| H  | -3.14674600 | -0.37296700 | -5.21623200 |
| H  | -2.84528300 | 1.57122000  | -0.67359300 |
| Cu | 0.15288700  | 1.46346600  | -1.11940800 |
| B  | 3.76393700  | -2.30241500 | -0.36898300 |
| C  | 2.39014300  | -0.58191200 | -1.79050900 |
| C  | -0.45649400 | 2.61484300  | -4.23967600 |
| O  | 4.92320000  | -2.11674900 | -1.07156500 |
| O  | 3.93553300  | -3.08081200 | 0.75621700  |
| C  | 0.73087500  | 3.09478900  | -2.10911300 |
| N  | 0.42998900  | 3.41107400  | -3.39490800 |
| N  | 1.45344600  | 4.15013100  | -1.66143200 |
| C  | 0.94681900  | 4.64969800  | -3.74134300 |
| C  | 1.59723100  | 5.11587000  | -2.64238700 |
| C  | 6.01460900  | -2.56917200 | -0.22397100 |
| C  | 5.29529800  | -3.60092200 | 0.71696800  |
| C  | 1.89245400  | 4.31501900  | -0.28363300 |
| H  | 0.80925400  | 5.07976400  | -4.72050600 |
| H  | 2.13998700  | 6.03234300  | -2.47523800 |
| H  | 1.77362500  | 3.36393100  | 0.22958300  |
| H  | 1.26867300  | 5.06076100  | 0.20944100  |
| H  | 2.94383800  | 4.60437400  | -0.26390600 |
| H  | -0.35833000 | 1.56351800  | -3.97613700 |
| H  | -0.17508300 | 2.75472900  | -5.28593500 |
| H  | -1.49469500 | 2.92051500  | -4.09246400 |
| C  | 3.25565700  | 0.61279300  | -1.44933800 |
| C  | 3.64892000  | 0.92543000  | -0.14512100 |

|   |             |             |             |
|---|-------------|-------------|-------------|
| C | 4.49304100  | 2.01033900  | 0.10326300  |
| C | 4.93627500  | 2.81241600  | -0.94658500 |
| C | 3.68931500  | 1.44041100  | -2.49538400 |
| C | 4.51817500  | 2.53096200  | -2.25079500 |
| H | 3.31773800  | 0.31796800  | 0.68560400  |
| H | 4.84632900  | 3.15573900  | -3.07636300 |
| H | 2.76907800  | -0.99246100 | -2.73256700 |
| H | 4.79468600  | 2.22238300  | 1.12390700  |
| H | 5.59830900  | 3.65189100  | -0.75350300 |
| H | 3.37215300  | 1.21619300  | -3.50998600 |
| C | 6.52807600  | -1.33121200 | 0.51846000  |
| H | 7.41175100  | -1.56215400 | 1.12050900  |
| H | 6.79208400  | -0.56592100 | -0.21499800 |
| H | 5.75713000  | -0.91044400 | 1.16842200  |
| C | 7.10925600  | -3.15461200 | -1.10646600 |
| H | 7.53238400  | -2.36630400 | -1.73448100 |
| H | 7.91538300  | -3.57285800 | -0.49504400 |
| H | 6.72278100  | -3.93771200 | -1.76054000 |
| C | 5.83631500  | -3.65865100 | 2.13972000  |
| H | 5.25861400  | -4.37842600 | 2.72632400  |
| H | 6.88252500  | -3.98024700 | 2.14162400  |
| H | 5.77113400  | -2.68749800 | 2.63182500  |
| C | 5.21107200  | -5.00739600 | 0.11882400  |
| H | 6.18605600  | -5.50249400 | 0.11431700  |
| H | 4.52155600  | -5.60717400 | 0.71876700  |
| H | 4.83211700  | -4.97462600 | -0.90605000 |
| C | 2.37144000  | -1.70015500 | -0.75112700 |
| H | 1.90651900  | -1.33767900 | 0.16467700  |
| H | 1.70906400  | -2.50350200 | -1.10269400 |
| C | 0.93820900  | -0.12746600 | -2.15865400 |
| O | 0.60372300  | -0.30334000 | -3.31431500 |
| S | -1.55317200 | 3.49316100  | 0.83574200  |
| O | -1.22226700 | 4.61583000  | -0.05408500 |
| O | -2.97772100 | 3.16162700  | 1.01011700  |
| C | -0.99926200 | 4.05780900  | 2.51946000  |
| F | -1.62113200 | 5.18694600  | 2.87027200  |
| F | 0.33366600  | 4.29121700  | 2.52253300  |
| F | -1.24933300 | 3.12130200  | 3.44643300  |
| O | -0.67686800 | 2.27442100  | 0.66403700  |

**TS10<sub>b</sub>**

|   |             |             |            |
|---|-------------|-------------|------------|
| P | 0.11103200  | -0.59432100 | 1.95869500 |
| C | 0.52883700  | -2.24496300 | 2.71447000 |
| H | 1.28398500  | -2.71830400 | 2.07716300 |
| H | 0.99912200  | -2.06609300 | 3.68537200 |
| C | -0.67491600 | -3.18073800 | 2.90290900 |
| H | -0.36841300 | -3.97808900 | 3.59007200 |
| H | -1.48826300 | -2.64419300 | 3.40058800 |

|   |             |             |             |
|---|-------------|-------------|-------------|
| C | -1.18664400 | -3.85301900 | 1.62436000  |
| H | -1.88281100 | -4.66151900 | 1.86947400  |
| H | -0.34266800 | -4.31401200 | 1.10063800  |
| P | -1.99071700 | -2.72951000 | 0.38962400  |
| C | 1.53611700  | 0.43461500  | 2.51473600  |
| C | 1.36079000  | 1.82589900  | 2.56875000  |
| C | 2.76217100  | -0.11309700 | 2.91304600  |
| C | 2.38705000  | 2.64734300  | 3.02789200  |
| H | 0.41382300  | 2.26300000  | 2.26894900  |
| C | 3.79253700  | 0.71571200  | 3.36381200  |
| H | 2.94858700  | -1.17722600 | 2.84502600  |
| C | 3.60646800  | 2.09542400  | 3.42940600  |
| H | 2.23334500  | 3.72119600  | 3.07613100  |
| H | 4.74005900  | 0.27413500  | 3.65722600  |
| H | 4.40391600  | 2.73873900  | 3.78914900  |
| C | -1.17542000 | 0.03967700  | 3.10153200  |
| C | -1.06321300 | -0.12541600 | 4.49276500  |
| C | -2.25359800 | 0.75436100  | 2.57940900  |
| C | -2.03537300 | 0.40178300  | 5.33742800  |
| H | -0.21422600 | -0.65191700 | 4.91819500  |
| C | -3.22081400 | 1.29712700  | 3.42858100  |
| H | -2.33112500 | 0.89873500  | 1.51185200  |
| C | -3.11648100 | 1.11420900  | 4.80495200  |
| H | -1.94788300 | 0.26601400  | 6.41154900  |
| H | -4.04207600 | 1.85390000  | 2.99086400  |
| H | -3.86975200 | 1.52846400  | 5.46883600  |
| C | -2.61094100 | -3.91410900 | -0.86247200 |
| C | -1.87853400 | -5.05831100 | -1.20578200 |
| C | -3.77904700 | -3.61294300 | -1.57603700 |
| C | -2.30781800 | -5.88682000 | -2.24201200 |
| H | -0.96150800 | -5.30662500 | -0.68210800 |
| C | -4.19832500 | -4.43598600 | -2.61713000 |
| H | -4.34671200 | -2.72298500 | -1.33254000 |
| C | -3.46546000 | -5.57509200 | -2.95372000 |
| H | -1.73135500 | -6.77137100 | -2.49647400 |
| H | -5.09519500 | -4.18014000 | -3.17225900 |
| H | -3.79267400 | -6.21334400 | -3.76883200 |
| C | -3.51202800 | -2.10420100 | 1.17835100  |
| C | -4.13610000 | -2.76163400 | 2.24734100  |
| C | -4.07738600 | -0.92730000 | 0.66770600  |
| C | -5.30459500 | -2.24069900 | 2.80072800  |
| H | -3.71738100 | -3.67711800 | 2.65209800  |
| C | -5.25637500 | -0.41855500 | 1.21028100  |
| H | -3.57811200 | -0.38601300 | -0.12685800 |
| C | -5.86651900 | -1.07268000 | 2.28048600  |
| H | -5.77553200 | -2.74719000 | 3.63806300  |
| H | -5.65091200 | 0.51451800  | 0.82435900  |
| H | -6.77347600 | -0.66693100 | 2.71875200  |



|    |             |             |             |
|----|-------------|-------------|-------------|
| Pd | -0.57607600 | -0.97413900 | -0.38726300 |
| C  | -0.96682200 | -2.41035900 | -3.01525700 |
| C  | -1.39755400 | -1.34394500 | -2.22061700 |
| C  | -2.42580600 | -0.52011800 | -2.68650100 |
| C  | -3.01947700 | -0.77003300 | -3.92942900 |
| C  | -2.58929500 | -1.83692200 | -4.71726300 |
| C  | -1.55579300 | -2.65551000 | -4.25612500 |
| H  | -0.17326000 | -3.06697200 | -2.66975400 |
| H  | -3.82054300 | -0.12156600 | -4.27606100 |
| H  | -3.05318300 | -2.03089000 | -5.68029400 |
| H  | -1.21221700 | -3.49237900 | -4.85844900 |
| H  | -2.75944600 | 0.32815500  | -2.09984800 |
| Cu | -0.18158900 | 1.50432100  | -0.88079000 |
| B  | 4.09010200  | -1.89155400 | -0.15490600 |
| C  | 2.47245800  | -0.41699100 | -1.55642000 |
| C  | -0.98983300 | 2.82740800  | -3.72992100 |
| O  | 5.03144500  | -2.12898400 | -1.12030900 |
| O  | 4.57471900  | -2.06435100 | 1.12264900  |
| C  | 0.36314600  | 3.22931400  | -1.67880400 |
| N  | -0.05184200 | 3.60486500  | -2.91632800 |
| N  | 1.13637700  | 4.26040600  | -1.25790100 |
| C  | 0.44480000  | 4.85149200  | -3.25628000 |
| C  | 1.19883700  | 5.26934300  | -2.20433200 |
| C  | 6.32316100  | -2.22215100 | -0.45740300 |
| C  | 5.91867800  | -2.60890000 | 1.01453300  |
| C  | 1.71096900  | 4.32655600  | 0.07334400  |
| H  | 0.22786100  | 5.31957800  | -4.20288000 |
| H  | 1.77046000  | 6.17059000  | -2.05279600 |
| H  | 2.00498400  | 3.32463100  | 0.37510800  |
| H  | 0.97613400  | 4.72400500  | 0.77901700  |
| H  | 2.59806600  | 4.96063300  | 0.05834500  |
| H  | -0.72981900 | 1.77147100  | -3.65692100 |
| H  | -0.89981400 | 3.15030200  | -4.76898000 |
| H  | -2.00625100 | 2.99391900  | -3.36732800 |
| C  | 3.26249500  | 0.86901600  | -1.36223600 |
| C  | 3.87606100  | 1.20504300  | -0.15136300 |
| C  | 4.62829900  | 2.37710600  | -0.02953100 |
| C  | 4.75747700  | 3.24532300  | -1.11114300 |
| C  | 3.38676500  | 1.75959500  | -2.44070900 |
| C  | 4.12179000  | 2.93451200  | -2.31749000 |
| H  | 3.78578900  | 0.55451000  | 0.70685500  |
| H  | 4.19979500  | 3.60959900  | -3.16464600 |
| H  | 2.82767700  | -0.86825400 | -2.48974500 |
| H  | 5.09737200  | 2.60792700  | 0.92203100  |
| H  | 5.34286100  | 4.15578900  | -1.01835700 |
| H  | 2.88395900  | 1.52385600  | -3.37248300 |
| C  | 6.96927200  | -0.83810600 | -0.56644200 |
| H  | 7.97720400  | -0.83217500 | -0.14183800 |

|   |             |             |             |
|---|-------------|-------------|-------------|
| H | 7.03468400  | -0.56414300 | -1.62223800 |
| H | 6.36714500  | -0.07639800 | -0.06660000 |
| C | 7.16878600  | -3.25987900 | -1.18527200 |
| H | 7.37395100  | -2.91417900 | -2.20171900 |
| H | 8.12668600  | -3.40497800 | -0.67542300 |
| H | 6.65765000  | -4.22139100 | -1.25191200 |
| C | 6.77762100  | -1.97774300 | 2.10384000  |
| H | 6.40565600  | -2.28074800 | 3.08685000  |
| H | 7.81802300  | -2.30681300 | 2.01913000  |
| H | 6.75010500  | -0.88838000 | 2.04897600  |
| C | 5.79811300  | -4.11881300 | 1.23454400  |
| H | 6.77652000  | -4.60709900 | 1.22961200  |
| H | 5.32670000  | -4.29951300 | 2.20431400  |
| H | 5.17624600  | -4.57968800 | 0.46240200  |
| C | 2.61512200  | -1.44871900 | -0.43839300 |
| H | 2.18854600  | -1.06001100 | 0.48437600  |
| H | 2.00753400  | -2.32564100 | -0.70270100 |
| C | 0.99401800  | -0.03443100 | -1.88365400 |
| O | 0.76066800  | 0.22881000  | -3.05021200 |
| S | -3.22570500 | 2.87199300  | -0.33422900 |
| O | -3.47628900 | 3.48211000  | -1.64736100 |
| O | -4.38599000 | 2.59541800  | 0.52951300  |
| C | -2.28251200 | 4.18354800  | 0.61674600  |
| F | -3.13112000 | 4.99551800  | 1.25191200  |
| F | -1.52012400 | 4.92841600  | -0.19963500 |
| F | -1.46864100 | 3.62411500  | 1.54083200  |
| O | -2.25979700 | 1.71604000  | -0.37134800 |

**8<sub>b</sub>"**

|   |             |             |            |
|---|-------------|-------------|------------|
| P | -0.10973500 | 0.42978100  | 1.95467400 |
| C | -0.47798700 | 2.02630900  | 2.85238100 |
| H | -1.22663200 | 2.57128500  | 2.26721300 |
| H | -0.94563000 | 1.76518600  | 3.80558300 |
| C | 0.74105300  | 2.92017600  | 3.11627900 |
| H | 0.45397800  | 3.64983000  | 3.88265700 |
| H | 1.55219200  | 2.32692000  | 3.54826100 |
| C | 1.23881500  | 3.70526100  | 1.90007500 |
| H | 1.95140300  | 4.47853300  | 2.20332900 |
| H | 0.39055300  | 4.22424600  | 1.44185300 |
| P | 1.99751300  | 2.68842800  | 0.54993500 |
| C | -1.53624900 | -0.59448200 | 2.51843300 |
| C | -1.36636300 | -1.98363400 | 2.61171000 |
| C | -2.76518400 | -0.03379800 | 2.89184900 |
| C | -2.40170900 | -2.79127100 | 3.07636000 |
| H | -0.41654200 | -2.42963700 | 2.33534400 |
| C | -3.80366100 | -0.84759400 | 3.34974300 |
| H | -2.94721000 | 1.02978800  | 2.80272100 |
| C | -3.62428200 | -2.22658700 | 3.44822300 |

|    |             |             |             |
|----|-------------|-------------|-------------|
| H  | -2.25175800 | -3.86419000 | 3.15185600  |
| H  | -4.75226400 | -0.39510400 | 3.62160300  |
| H  | -4.42860000 | -2.85854800 | 3.81272700  |
| C  | 1.21586900  | -0.28638400 | 2.99597000  |
| C  | 1.10770600  | -0.29438100 | 4.39789500  |
| C  | 2.33295100  | -0.86146800 | 2.39004600  |
| C  | 2.11966600  | -0.85369300 | 5.17142000  |
| H  | 0.23046300  | 0.12337200  | 4.88285600  |
| C  | 3.34224900  | -1.43678800 | 3.16638400  |
| H  | 2.41156500  | -0.87495500 | 1.31290700  |
| C  | 3.23907200  | -1.42576100 | 4.55464200  |
| H  | 2.03452400  | -0.85280400 | 6.25423600  |
| H  | 4.19045600  | -1.88752600 | 2.66373900  |
| H  | 4.02364300  | -1.86720600 | 5.16230700  |
| C  | 2.57721200  | 3.98436200  | -0.61174800 |
| C  | 1.86938900  | 5.18210000  | -0.77982000 |
| C  | 3.69310500  | 3.73527600  | -1.42241900 |
| C  | 2.27137400  | 6.11327800  | -1.73715800 |
| H  | 0.99417600  | 5.39701300  | -0.17687500 |
| C  | 4.08389600  | 4.66097200  | -2.38535100 |
| H  | 4.24521000  | 2.80964900  | -1.31560600 |
| C  | 3.37653900  | 5.85323200  | -2.54581400 |
| H  | 1.71438400  | 7.03838700  | -1.85317500 |
| H  | 4.93939200  | 4.44450400  | -3.01718800 |
| H  | 3.68256100  | 6.57246700  | -3.29940600 |
| C  | 3.55280200  | 2.02224900  | 1.23517100  |
| C  | 4.17043500  | 2.55885400  | 2.37294900  |
| C  | 4.15048300  | 0.94044800  | 0.57224600  |
| C  | 5.36544800  | 2.01533200  | 2.84162100  |
| H  | 3.72758600  | 3.39742600  | 2.89958600  |
| C  | 5.35669200  | 0.41290100  | 1.03063400  |
| H  | 3.65525300  | 0.47988900  | -0.27501200 |
| C  | 5.96142900  | 0.94717900  | 2.16852100  |
| H  | 5.83065600  | 2.42752300  | 3.73222600  |
| H  | 5.77816400  | -0.44891400 | 0.52666400  |
| H  | 6.88975700  | 0.52306000  | 2.53941800  |
| Pd | 0.48778800  | 1.02485700  | -0.37514300 |
| C  | 0.75050200  | 2.78291400  | -2.83089700 |
| C  | 1.21629800  | 1.63445000  | -2.18763200 |
| C  | 2.23055600  | 0.87788500  | -2.78230500 |
| C  | 2.78751400  | 1.28745900  | -3.99810900 |
| C  | 2.32562000  | 2.43951500  | -4.63614800 |
| C  | 1.30018500  | 3.18394000  | -4.05101900 |
| H  | -0.03599800 | 3.38283100  | -2.38107800 |
| H  | 3.58305000  | 0.69711300  | -4.44646200 |
| H  | 2.75981200  | 2.75479800  | -5.58075900 |
| H  | 0.93276800  | 4.08384900  | -4.53713100 |
| H  | 2.58072600  | -0.03485800 | -2.31159100 |

|    |             |             |             |
|----|-------------|-------------|-------------|
| Cu | 0.31153100  | -1.56779100 | -0.80859900 |
| B  | -4.17423300 | 1.87967500  | -0.09602500 |
| C  | -2.46027400 | 0.53483100  | -1.52164400 |
| C  | 0.92773200  | -2.77796400 | -3.76214600 |
| O  | -5.11690000 | 2.12752100  | -1.05724700 |
| O  | -4.67995100 | 1.94579300  | 1.18344200  |
| C  | -0.35581600 | -3.20993300 | -1.66569200 |
| N  | -0.00917800 | -3.54446900 | -2.93708000 |
| N  | -1.14060200 | -4.23776300 | -1.25477400 |
| C  | -0.56163200 | -4.75871200 | -3.30688400 |
| C  | -1.27989100 | -5.20027300 | -2.24051800 |
| C  | -6.41862900 | 2.10947000  | -0.40653600 |
| C  | -6.04977900 | 2.42531000  | 1.09135400  |
| C  | -1.66391000 | -4.34733200 | 0.09376900  |
| H  | -0.40395900 | -5.18943300 | -4.28251300 |
| H  | -1.87708500 | -6.08702200 | -2.10307000 |
| H  | -1.93479300 | -3.35499100 | 0.44289500  |
| H  | -0.90937300 | -4.77978300 | 0.75745400  |
| H  | -2.55848600 | -4.97126700 | 0.08907100  |
| H  | 0.74678600  | -1.71587500 | -3.60484200 |
| H  | 0.74629400  | -3.02202000 | -4.81088800 |
| H  | 1.95256600  | -3.03249500 | -3.48353600 |
| C  | -3.22030900 | -0.77731800 | -1.38858400 |
| C  | -3.81078000 | -1.18562400 | -0.18868300 |
| C  | -4.52353400 | -2.38558000 | -0.10947200 |
| C  | -4.63846400 | -3.20927900 | -1.22668100 |
| C  | -3.33429700 | -1.62136900 | -2.50548200 |
| C  | -4.03066600 | -2.82328600 | -2.42537300 |
| H  | -3.73325800 | -0.57058700 | 0.69551600  |
| H  | -4.09954000 | -3.46194600 | -3.30101100 |
| H  | -2.78920200 | 1.00027200  | -2.45777800 |
| H  | -4.97321600 | -2.67153500 | 0.83649300  |
| H  | -5.19303900 | -4.14168100 | -1.16832900 |
| H  | -2.85106800 | -1.33181600 | -3.43131200 |
| C  | -6.98671700 | 0.70217500  | -0.60968200 |
| H  | -8.00093800 | 0.61720700  | -0.20891400 |
| H  | -7.01754100 | 0.48875600  | -1.68087600 |
| H  | -6.35420000 | -0.05545700 | -0.14251000 |
| C  | -7.31224200 | 3.14391900  | -1.07953400 |
| H  | -7.49197100 | 2.85053200  | -2.11705400 |
| H  | -8.27996400 | 3.20774400  | -0.57158600 |
| H  | -6.85177000 | 4.13292700  | -1.08278600 |
| C  | -6.88512500 | 1.68382100  | 2.12812500  |
| H  | -6.54444200 | 1.94947600  | 3.13311000  |
| H  | -7.94169100 | 1.95716600  | 2.04558100  |
| H  | -6.79329600 | 0.60306000  | 2.00993900  |
| C  | -6.01057400 | 3.92294700  | 1.40424200  |
| H  | -7.01321700 | 4.35909300  | 1.42004700  |

|   |             |             |             |
|---|-------------|-------------|-------------|
| H | -5.55518700 | 4.06782300  | 2.38758100  |
| H | -5.40869100 | 4.46151500  | 0.66742100  |
| C | -2.67386200 | 1.53557400  | -0.38453600 |
| H | -2.22537300 | 1.15748100  | 0.53351300  |
| H | -2.12179300 | 2.45351900  | -0.62986300 |
| C | -0.95802000 | 0.19645200  | -1.79901700 |
| O | -0.70996000 | -0.23898000 | -2.90901800 |
| S | 3.38432100  | -2.79062000 | -0.61893900 |
| O | 3.63058500  | -3.41530900 | -1.92572400 |
| O | 4.54442500  | -2.53414300 | 0.25035900  |
| C | 2.41638800  | -4.09611300 | 0.33034900  |
| F | 3.25157600  | -4.85926200 | 1.03948600  |
| F | 1.72314800  | -4.88933800 | -0.49948500 |
| F | 1.53559100  | -3.53488900 | 1.19333000  |
| O | 2.44330400  | -1.61193700 | -0.67438700 |

### COM<sub>3-R<sub>2</sub></sub>

|    |             |             |             |
|----|-------------|-------------|-------------|
| Cu | 0.10418000  | 0.55419800  | 0.03431200  |
| B  | 1.98942700  | -1.03708000 | -1.75525200 |
| C  | 0.62391700  | 1.11734000  | -1.81319400 |
| C  | -1.46768300 | -1.55257000 | 2.37723900  |
| O  | 3.32294900  | -1.07646700 | -1.40774700 |
| O  | 1.26587800  | -2.02752500 | -1.11048200 |
| C  | 0.04232100  | 0.38279500  | 1.96880800  |
| N  | -0.55435400 | -0.50392600 | 2.81166600  |
| N  | 0.74704300  | 1.20298000  | 2.79892600  |
| C  | -0.23273400 | -0.24420400 | 4.13508000  |
| C  | 0.59591700  | 0.83341000  | 4.12475700  |
| C  | 3.45636200  | -1.93229100 | -0.24622400 |
| C  | 2.18959400  | -2.85881300 | -0.36725200 |
| C  | 1.60811200  | 2.28822400  | 2.32813200  |
| H  | -0.62034100 | -0.83249000 | 4.95132100  |
| H  | 1.08179600  | 1.35914700  | 4.93106300  |
| H  | 1.77285700  | 2.98894700  | 3.14810000  |
| H  | 1.13008800  | 2.80559500  | 1.49704300  |
| H  | 2.56650700  | 1.89843700  | 1.97983200  |
| H  | -1.30962700 | -1.73367400 | 1.31693100  |
| H  | -2.50503400 | -1.24882000 | 2.53355700  |
| H  | -1.26635500 | -2.46883400 | 2.93680000  |
| C  | 1.45144500  | 2.26721300  | -1.37491100 |
| C  | 2.84646600  | 2.19049800  | -1.15263300 |
| C  | 3.55920300  | 3.26949000  | -0.62888200 |
| C  | 2.92353500  | 4.47252900  | -0.31499800 |
| C  | 0.83339900  | 3.50865600  | -1.07799300 |
| C  | 1.54863600  | 4.58212500  | -0.55816500 |
| H  | 3.37137200  | 1.26847200  | -1.37287500 |
| H  | 1.03266800  | 5.51597200  | -0.34690100 |

|   |             |             |             |
|---|-------------|-------------|-------------|
| H | -0.27143800 | 1.49015900  | -2.32075700 |
| H | 4.63066000  | 3.16777900  | -0.46983800 |
| H | 3.48459800  | 5.31060500  | 0.08728800  |
| H | -0.23552400 | 3.60816800  | -1.25399800 |
| C | 3.41555500  | -1.01361500 | 0.97984900  |
| H | 3.56541200  | -1.57097600 | 1.90920900  |
| H | 4.20925100  | -0.26801200 | 0.88671100  |
| H | 2.46039700  | -0.48502700 | 1.03627400  |
| C | 4.79574100  | -2.65505000 | -0.32215000 |
| H | 5.60772600  | -1.92551200 | -0.26012600 |
| H | 4.90554700  | -3.35860400 | 0.50960600  |
| H | 4.90399500  | -3.20125000 | -1.26038700 |
| C | 1.53906600  | -3.23229500 | 0.96050600  |
| H | 0.64180200  | -3.82890000 | 0.77245900  |
| H | 2.22257400  | -3.82599800 | 1.57620600  |
| H | 1.24477900  | -2.34304400 | 1.51794700  |
| C | 2.43642300  | -4.11140000 | -1.21238100 |
| H | 3.09014300  | -4.82398200 | -0.70125900 |
| H | 1.47923300  | -4.60272200 | -1.40824800 |
| H | 2.88666900  | -3.85076600 | -2.17364800 |
| C | 1.32240300  | 0.02976300  | -2.67777600 |
| H | 0.55238000  | -0.46853500 | -3.28008300 |
| H | 2.04185700  | 0.47147700  | -3.38375900 |
| C | -2.05468400 | -1.36408500 | -1.22392400 |
| C | -3.18182200 | -0.81713400 | -0.60916600 |
| C | -4.11148000 | -1.62420300 | 0.04990900  |
| C | -3.89588300 | -3.00324800 | 0.10137400  |
| C | -2.76654700 | -3.56546700 | -0.49979000 |
| C | -1.85192000 | -2.74615500 | -1.16167700 |
| H | -1.32629900 | -0.72957300 | -1.71378200 |
| H | -4.98517200 | -1.18615700 | 0.51960400  |
| H | -4.61481300 | -3.63552000 | 0.61428700  |
| H | -2.60368600 | -4.63801900 | -0.45270300 |
| H | -0.95489200 | -3.15438400 | -1.61261400 |
| I | -3.45224500 | 1.28338100  | -0.61825700 |

**TS24<sub>a</sub>**

|    |             |             |             |
|----|-------------|-------------|-------------|
| Cu | -0.83332600 | 0.34363200  | -0.01043800 |
| B  | 1.84549100  | -1.03252600 | -1.27446100 |
| C  | -0.09319200 | 0.65124000  | -1.89692600 |
| C  | -0.27656500 | -1.48507600 | 2.76203900  |
| O  | 3.19405500  | -0.80986600 | -1.46815100 |
| O  | 1.61126600  | -1.73576500 | -0.10158500 |
| C  | 0.08618300  | 0.74644600  | 1.74254400  |
| N  | 0.25938000  | -0.13112400 | 2.76998100  |
| N  | 0.70203600  | 1.87816100  | 2.17862900  |
| C  | 0.97030900  | 0.43467900  | 3.81663400  |
| C  | 1.25359100  | 1.70867800  | 3.43963300  |

|   |             |             |             |
|---|-------------|-------------|-------------|
| C | 3.88174600  | -1.16351300 | -0.24409300 |
| C | 2.90250000  | -2.21241300 | 0.37541300  |
| C | 0.78613400  | 3.12269600  | 1.42193400  |
| H | 1.19929800  | -0.10531400 | 4.72138000  |
| H | 1.78583400  | 2.49663500  | 3.94779200  |
| H | 0.59011400  | 3.96409800  | 2.09040300  |
| H | 0.04292500  | 3.10560500  | 0.62918300  |
| H | 1.76911600  | 3.23328300  | 0.96199500  |
| H | 0.06689100  | -1.99333900 | 1.86151800  |
| H | -1.36831900 | -1.45196600 | 2.77848700  |
| H | 0.08729700  | -2.01690900 | 3.64238900  |
| C | 0.52887700  | 1.98066500  | -1.86976200 |
| C | 1.92099900  | 2.20718600  | -1.77695800 |
| C | 2.44149500  | 3.49922400  | -1.69925800 |
| C | 1.60399100  | 4.61619200  | -1.71665000 |
| C | -0.29906900 | 3.13122100  | -1.91471000 |
| C | 0.22251700  | 4.41632800  | -1.83731300 |
| H | 2.60193800  | 1.36605300  | -1.78542300 |
| H | -0.44847400 | 5.27084100  | -1.87591200 |
| H | -1.01885000 | 0.68323600  | -2.47447000 |
| H | 3.51899400  | 3.63327300  | -1.63382300 |
| H | 2.01485900  | 5.61960500  | -1.65985600 |
| H | -1.37429100 | 2.99034200  | -2.00367700 |
| C | 3.99085200  | 0.11483400  | 0.59688200  |
| H | 4.56556000  | -0.05360300 | 1.51200500  |
| H | 4.49773200  | 0.88323000  | 0.00777600  |
| H | 3.00175700  | 0.49425500  | 0.86635400  |
| C | 5.26552900  | -1.69604300 | -0.59260000 |
| H | 5.86645800  | -0.89613000 | -1.03348800 |
| H | 5.78132300  | -2.05392100 | 0.30440800  |
| H | 5.20862200  | -2.51218100 | -1.31435100 |
| C | 2.91716100  | -2.26001500 | 1.89745100  |
| H | 2.22985000  | -3.03032100 | 2.25728200  |
| H | 3.91981000  | -2.51709500 | 2.25414400  |
| H | 2.62878400  | -1.30375800 | 2.33347400  |
| C | 3.08842100  | -3.62054300 | -0.19827800 |
| H | 4.00539500  | -4.08863000 | 0.17087000  |
| H | 2.23835600  | -4.23886100 | 0.10222700  |
| H | 3.12268500  | -3.59720400 | -1.29046700 |
| C | 0.75415700  | -0.56683700 | -2.29888800 |
| H | 0.06399700  | -1.40393200 | -2.44911100 |
| H | 1.25275400  | -0.39034700 | -3.26679700 |
| C | -1.88396800 | -2.31597500 | -0.44071200 |
| C | -2.36511300 | -1.05127800 | -0.80962400 |
| C | -2.89210400 | -0.84713000 | -2.09604900 |
| C | -2.81763700 | -1.86982100 | -3.03447200 |
| C | -2.26631400 | -3.11311700 | -2.69850000 |
| C | -1.80664300 | -3.32823800 | -1.39993300 |

|   |             |             |             |
|---|-------------|-------------|-------------|
| H | -1.55943600 | -2.50832300 | 0.57226100  |
| H | -3.32468600 | 0.11078700  | -2.36100400 |
| H | -3.19566000 | -1.69504800 | -4.03789500 |
| H | -2.21679300 | -3.90665300 | -3.43695800 |
| H | -1.39247400 | -4.29209000 | -1.11753600 |
| I | -3.46939600 | 0.13096500  | 0.90854000  |

**16<sub>a</sub>**

|    |             |             |             |
|----|-------------|-------------|-------------|
| Cu | -1.03570000 | -0.14874700 | -0.09364100 |
| B  | 2.24672900  | -1.02178100 | -1.12136900 |
| C  | -0.18931100 | -0.24368300 | -2.00596400 |
| C  | 0.35486500  | -1.42229300 | 2.47643500  |
| O  | 3.36872900  | -0.28959700 | -1.43330900 |
| O  | 2.38739600  | -1.71354000 | 0.05875900  |
| C  | 0.24963100  | 0.70928500  | 1.21156200  |
| N  | 0.66365100  | -0.00812400 | 2.29274600  |
| N  | 0.57300000  | 1.99122200  | 1.52186500  |
| C  | 1.21150600  | 0.81176400  | 3.26584000  |
| C  | 1.16005300  | 2.07717900  | 2.77561300  |
| C  | 4.24773900  | -0.30575000 | -0.27601100 |
| C  | 3.78474000  | -1.61053100 | 0.46334300  |
| C  | 0.21483800  | 3.15638200  | 0.72446500  |
| H  | 1.57734200  | 0.42907300  | 4.20493100  |
| H  | 1.48339600  | 3.01536200  | 3.19644800  |
| H  | -0.21384200 | 3.91722600  | 1.37996200  |
| H  | -0.53194100 | 2.86244100  | -0.00780000 |
| H  | 1.08734400  | 3.55855800  | 0.20783700  |
| H  | 0.74233800  | -1.98589400 | 1.62897400  |
| H  | -0.72804500 | -1.54592200 | 2.56202600  |
| H  | 0.83827700  | -1.77156700 | 3.39011900  |
| C  | -0.07128000 | 1.21729900  | -2.20711000 |
| C  | 1.15860200  | 1.89783000  | -2.28180800 |
| C  | 1.19485000  | 3.26638800  | -2.54602900 |
| C  | 0.01476100  | 3.99446600  | -2.70957400 |
| C  | -1.25625100 | 1.96417300  | -2.38954500 |
| C  | -1.21504700 | 3.33435300  | -2.62571600 |
| H  | 2.08706700  | 1.35515100  | -2.16129800 |
| H  | -2.14149800 | 3.88595100  | -2.75326100 |
| H  | -0.98214400 | -0.62621500 | -2.63837700 |
| H  | 2.15564200  | 3.76813300  | -2.62384800 |
| H  | 0.05077800  | 5.06126600  | -2.90808400 |
| H  | -2.21291500 | 1.45336600  | -2.33287200 |
| C  | 3.95887500  | 0.97210500  | 0.51602300  |
| H  | 4.62462900  | 1.06926200  | 1.37779000  |
| H  | 4.11358300  | 1.83469800  | -0.13757700 |
| H  | 2.92621200  | 0.99285900  | 0.86620000  |
| C  | 5.69163700  | -0.31843500 | -0.76137900 |
| H  | 5.91252400  | 0.61826500  | -1.28007500 |



|   |             |             |             |
|---|-------------|-------------|-------------|
| H | 6.38109000  | -0.40935300 | 0.08398300  |
| H | 5.87612000  | -1.14047200 | -1.45427400 |
| C | 3.87025800  | -1.54691700 | 1.98219500  |
| H | 3.48831900  | -2.47635800 | 2.41334600  |
| H | 4.91248200  | -1.43290500 | 2.29676200  |
| H | 3.29298100  | -0.71505000 | 2.38399000  |
| C | 4.47478100  | -2.87570800 | -0.05411600 |
| H | 5.52241000  | -2.91865700 | 0.25595900  |
| H | 3.95815900  | -3.75017100 | 0.34963400  |
| H | 4.43164600  | -2.92921900 | -1.14513500 |
| C | 1.01937600  | -1.16262200 | -2.09303600 |
| H | 0.64263700  | -2.18694800 | -2.00346300 |
| H | 1.41688900  | -1.07231100 | -3.11774200 |
| C | -1.57685200 | -2.86178200 | -0.64697700 |
| C | -2.06865700 | -1.57807700 | -0.88696000 |
| C | -3.29573700 | -1.41200400 | -1.53153100 |
| C | -4.03726000 | -2.53062500 | -1.91366800 |
| C | -3.55799500 | -3.81872700 | -1.65723600 |
| C | -2.33007100 | -3.98259200 | -1.01963200 |
| H | -0.61203800 | -3.00739500 | -0.16772100 |
| H | -3.69604300 | -0.41775800 | -1.70286100 |
| H | -4.99885000 | -2.39569400 | -2.40181000 |
| H | -4.13913900 | -4.68648600 | -1.95501300 |
| H | -1.94702000 | -4.97944900 | -0.81685000 |
| I | -3.00510500 | 0.60006300  | 1.56172700  |

#### COM<sub>4-R<sub>2</sub></sub>

|    |             |             |             |
|----|-------------|-------------|-------------|
| Cu | -0.07037900 | -0.66886900 | 0.49139600  |
| B  | -3.36050200 | 0.53930700  | 0.47430000  |
| C  | -2.72818300 | -1.78790400 | -0.34421200 |
| C  | 0.49306100  | 1.99483600  | 2.53756300  |
| O  | -4.22001200 | 1.03641400  | -0.46897000 |
| O  | -2.51353300 | 1.50691400  | 0.98157100  |
| C  | 1.30311800  | -0.23460800 | 1.80299500  |
| N  | 1.44524000  | 0.89215300  | 2.54982500  |
| N  | 2.42217000  | -0.95690100 | 2.07438100  |
| C  | 2.63856500  | 0.88560500  | 3.25398000  |
| C  | 3.25670200  | -0.28770400 | 2.95547100  |
| C  | -4.05196900 | 2.47769500  | -0.51686500 |
| C  | -2.62538600 | 2.67311000  | 0.11336400  |
| C  | 2.70329900  | -2.26215300 | 1.48987400  |
| H  | 2.93644100  | 1.69764500  | 3.89770800  |
| H  | 4.19434700  | -0.69927100 | 3.29325100  |
| H  | 2.83377700  | -3.00776300 | 2.27880600  |
| H  | 3.59902900  | -2.21107400 | 0.86891900  |
| H  | 1.85723700  | -2.54086400 | 0.86215500  |
| H  | 0.88124400  | 2.81662500  | 1.92827200  |
| H  | 0.32145200  | 2.34520400  | 3.55832900  |

|   |             |             |             |
|---|-------------|-------------|-------------|
| H | -0.44674600 | 1.64542700  | 2.10903100  |
| C | -2.33429400 | -3.21282900 | -0.05239100 |
| C | -1.67173600 | -3.57773400 | 1.13048000  |
| C | -1.19210800 | -4.87655700 | 1.31368300  |
| C | -1.35918600 | -5.83671000 | 0.31618300  |
| C | -2.48462800 | -4.18784100 | -1.05018000 |
| C | -2.00992300 | -5.48513600 | -0.86953100 |
| H | -1.53824700 | -2.84686300 | 1.92085600  |
| H | -2.14814700 | -6.22396300 | -1.65409300 |
| H | -3.45422500 | -1.76900500 | -1.16488300 |
| H | -0.69148200 | -5.13825400 | 2.24229500  |
| H | -0.99158800 | -6.84846700 | 0.46081400  |
| H | -2.97671700 | -3.91445400 | -1.97943700 |
| C | -5.17588100 | 3.07827100  | 0.33252900  |
| H | -5.16836000 | 4.17156100  | 0.29932200  |
| H | -6.13574500 | 2.72657000  | -0.05404100 |
| H | -5.09290600 | 2.75966400  | 1.37524300  |
| C | -4.17699600 | 2.92988200  | -1.96653100 |
| H | -5.19308200 | 2.73989600  | -2.32264000 |
| H | -3.97883600 | 4.00293700  | -2.05693900 |
| H | -3.48435600 | 2.38705100  | -2.61055800 |
| C | -2.46831400 | 3.93096500  | 0.95970200  |
| H | -1.44855300 | 3.99020100  | 1.35035200  |
| H | -2.64511900 | 4.82516700  | 0.35352600  |
| H | -3.15896600 | 3.93914500  | 1.80444600  |
| C | -1.49078800 | 2.57447800  | -0.91080000 |
| H | -1.47064600 | 3.45012700  | -1.56606300 |
| H | -0.53548600 | 2.52251300  | -0.38300300 |
| H | -1.57726000 | 1.67370300  | -1.52098100 |
| C | -3.28649800 | -0.98115400 | 0.85749700  |
| H | -4.27020200 | -1.37964900 | 1.13183600  |
| H | -2.63158100 | -1.09560200 | 1.72718500  |
| C | -1.42393700 | -1.08117100 | -0.84914700 |
| O | -1.35718700 | -0.80591900 | -2.04888200 |
| C | 1.70995000  | -0.38987000 | -1.87272500 |
| C | 2.86722700  | 0.23733000  | -1.41286800 |
| C | 4.09256100  | -0.43093500 | -1.36190900 |
| C | 4.15286800  | -1.76086600 | -1.78475400 |
| C | 3.00131600  | -2.41202900 | -2.23628500 |
| C | 1.78818100  | -1.72690300 | -2.27793200 |
| H | 0.75150400  | 0.11163700  | -1.94465200 |
| H | 4.98327500  | 0.07621400  | -1.00841200 |
| H | 5.10431900  | -2.28456600 | -1.75893700 |
| H | 3.05353800  | -3.44773600 | -2.55773000 |
| H | 0.87658500  | -2.20767300 | -2.61515200 |
| I | 2.77322400  | 2.25449300  | -0.76055000 |

TS25<sub>a</sub>

|    |             |             |             |
|----|-------------|-------------|-------------|
| Cu | -0.48643200 | -0.52785300 | 0.14494900  |
| B  | 1.84981800  | 2.17823000  | -0.24053500 |
| C  | -0.47802000 | 2.15042500  | -1.31797400 |
| C  | 0.57027100  | 0.71324400  | 3.24076500  |
| O  | 2.84099500  | 2.77496500  | -0.97112700 |
| O  | 2.26583900  | 1.02394700  | 0.38475000  |
| C  | -1.38474600 | 0.21072200  | 1.78677800  |
| N  | -0.85542800 | 0.71533900  | 2.93334200  |
| N  | -2.72486300 | 0.38225900  | 1.93846200  |
| C  | -1.84394300 | 1.19137900  | 3.78263600  |
| C  | -3.02874000 | 0.98049700  | 3.15088400  |
| C  | 4.08142500  | 2.06330100  | -0.69073100 |
| C  | 3.56414300  | 0.66997600  | -0.17995400 |
| C  | -3.70807500 | -0.03553000 | 0.94814100  |
| H  | -1.62090700 | 1.63582200  | 4.73949900  |
| H  | -4.04010000 | 1.20753700  | 3.44774600  |
| H  | -4.48261400 | 0.72568700  | 0.85694500  |
| H  | -4.15297400 | -0.99416100 | 1.23061300  |
| H  | -3.20565900 | -0.13595900 | -0.01285800 |
| H  | 0.80630300  | -0.09221000 | 3.94123900  |
| H  | 0.84822200  | 1.67340900  | 3.68328700  |
| H  | 1.13059900  | 0.56507300  | 2.31848000  |
| C  | -1.97128600 | 2.38842200  | -1.18819300 |
| C  | -2.54479700 | 3.09143000  | -0.12238900 |
| C  | -3.92469000 | 3.29870800  | -0.05850600 |
| C  | -4.76058200 | 2.79012900  | -1.05300600 |
| C  | -2.82502500 | 1.87369500  | -2.17848300 |
| C  | -4.20273300 | 2.07061000  | -2.11313700 |
| H  | -1.91291600 | 3.49219700  | 0.66176200  |
| H  | -4.84156500 | 1.66638600  | -2.89311700 |
| H  | -0.13590200 | 2.61872000  | -2.25017700 |
| H  | -4.34419800 | 3.86120600  | 0.77127700  |
| H  | -5.83324700 | 2.95393800  | -1.00557000 |
| H  | -2.39501200 | 1.31766600  | -3.00602900 |
| C  | 4.81207300  | 2.86817300  | 0.38706000  |
| H  | 5.79206700  | 2.43878000  | 0.61348400  |
| H  | 4.95527000  | 3.89134500  | 0.03041300  |
| H  | 4.22808700  | 2.90824000  | 1.31078700  |
| C  | 4.90700200  | 2.01112000  | -1.96973400 |
| H  | 5.20413000  | 3.02333700  | -2.25719900 |
| H  | 5.81495900  | 1.41859300  | -1.81879600 |
| H  | 4.33762200  | 1.57696800  | -2.79235000 |
| C  | 4.39940000  | 0.02115000  | 0.91573900  |
| H  | 3.92528100  | -0.91615300 | 1.21779300  |
| H  | 5.40652200  | -0.20512700 | 0.55136400  |
| H  | 4.48221300  | 0.66378200  | 1.79414200  |

|   |             |             |             |
|---|-------------|-------------|-------------|
| C | 3.30247900  | -0.32763900 | -1.31020400 |
| H | 4.24045300  | -0.67494100 | -1.75267900 |
| H | 2.77411600  | -1.18882300 | -0.89682500 |
| H | 2.67714800  | 0.10731200  | -2.09231100 |
| C | 0.37095300  | 2.69110900  | -0.14683000 |
| H | 0.33309500  | 3.78620400  | -0.15174300 |
| H | -0.05999900 | 2.34654100  | 0.79806500  |
| C | -0.23895200 | 0.61012100  | -1.51024400 |
| O | 0.10010600  | 0.23758200  | -2.61839600 |
| C | 0.04654800  | -2.48426000 | -2.11388100 |
| C | -0.51426800 | -2.35296900 | -0.84038500 |
| C | -1.79849300 | -2.84578200 | -0.55596800 |
| C | -2.57509700 | -3.34775900 | -1.60070400 |
| C | -2.04676900 | -3.43607600 | -2.89114500 |
| C | -0.73616300 | -3.01781600 | -3.13589200 |
| H | 1.05025100  | -2.13666800 | -2.31606000 |
| H | -2.18312500 | -2.82263900 | 0.45787000  |
| H | -3.58487900 | -3.69334500 | -1.39606600 |
| H | -2.64419300 | -3.85276400 | -3.69616800 |
| H | -0.31873900 | -3.09236200 | -4.13597000 |
| I | 0.96570100  | -2.69264900 | 1.07879300  |

**17<sub>a</sub>**

|    |             |             |             |
|----|-------------|-------------|-------------|
| Cu | 1.79592900  | -1.41764500 | 0.98915600  |
| B  | -2.97250700 | -0.01613600 | -0.58157800 |
| C  | -0.75116500 | 0.71047000  | -1.67460300 |
| C  | -1.18451300 | -2.04545700 | 2.28782600  |
| O  | -3.57715100 | 1.20903800  | -0.72990400 |
| O  | -3.59463500 | -0.81188600 | 0.35393400  |
| C  | 0.36282000  | -2.58396700 | 0.42769900  |
| N  | -0.82917700 | -2.74892700 | 1.05884700  |
| N  | 0.25029400  | -3.33401500 | -0.70128200 |
| C  | -1.67781800 | -3.56427600 | 0.33378400  |
| C  | -0.99407900 | -3.93982500 | -0.78064300 |
| C  | -4.80614200 | 1.19198500  | 0.04113200  |
| C  | -4.54143900 | 0.03388200  | 1.07116100  |
| C  | 1.26577800  | -3.39796600 | -1.74479200 |
| H  | -2.68389200 | -3.77651800 | 0.65492900  |
| H  | -1.27836300 | -4.56950900 | -1.60799400 |
| H  | 0.96388500  | -2.79683100 | -2.60558700 |
| H  | 1.41971700  | -4.43631900 | -2.04806600 |
| H  | 2.19327800  | -2.99220700 | -1.34499200 |
| H  | -0.37778500 | -2.16003000 | 3.01336000  |
| H  | -2.10163600 | -2.47841300 | 2.68759600  |
| H  | -1.33806300 | -0.99111300 | 2.06433200  |
| C  | 0.47811700  | 0.24809900  | -2.45193900 |
| C  | 1.74429700  | 0.14193900  | -1.86491200 |
| C  | 2.83385900  | -0.34567000 | -2.58824300 |

|   |             |             |             |
|---|-------------|-------------|-------------|
| C | 2.67690600  | -0.73396400 | -3.91798800 |
| C | 0.33344300  | -0.13926500 | -3.79189200 |
| C | 1.41956000  | -0.62646000 | -4.51936500 |
| H | 1.91173400  | 0.45190700  | -0.84034700 |
| H | 1.28516000  | -0.91552400 | -5.55786600 |
| H | -1.25045900 | 1.49873500  | -2.25436600 |
| H | 3.79865300  | -0.41569700 | -2.09494100 |
| H | 3.52341300  | -1.11015400 | -4.48461800 |
| H | -0.63935100 | -0.05740600 | -4.27018900 |
| C | -5.93730200 | 0.87821300  | -0.94321100 |
| H | -6.91660300 | 0.91052700  | -0.45731500 |
| H | -5.92376300 | 1.62136300  | -1.74449500 |
| H | -5.80424500 | -0.10916100 | -1.39393500 |
| C | -5.00815400 | 2.57039900  | 0.65927700  |
| H | -5.17102300 | 3.30626000  | -0.13283600 |
| H | -5.88389500 | 2.57842300  | 1.31612000  |
| H | -4.13404200 | 2.87958900  | 1.23378500  |
| C | -5.76281500 | -0.80532400 | 1.42609800  |
| H | -5.47472400 | -1.59314400 | 2.12792800  |
| H | -6.52912000 | -0.18922600 | 1.90720100  |
| H | -6.19722000 | -1.27881500 | 0.54436200  |
| C | -3.84199000 | 0.51936900  | 2.34414100  |
| H | -4.50293500 | 1.15176700  | 2.94316400  |
| H | -3.56266300 | -0.34528500 | 2.95095200  |
| H | -2.93250500 | 1.07594000  | 2.10704200  |
| C | -1.75749900 | -0.44316200 | -1.47586100 |
| H | -2.11514900 | -0.76316000 | -2.46210900 |
| H | -1.24533800 | -1.29580200 | -1.03661000 |
| C | -0.40018700 | 1.33493200  | -0.32060800 |
| O | -0.82274200 | 0.82290700  | 0.71437000  |
| C | 1.00129800  | 2.91805500  | 0.96823600  |
| C | 0.44484900  | 2.55381500  | -0.26728400 |
| C | 0.71977100  | 3.32957200  | -1.40474000 |
| C | 1.52470900  | 4.45978800  | -1.30128200 |
| C | 2.07657400  | 4.81385400  | -0.06721600 |
| C | 1.81793400  | 4.03940200  | 1.06558400  |
| H | 0.80530400  | 2.29158400  | 1.82945500  |
| H | 0.31386800  | 3.04948600  | -2.36999200 |
| H | 1.73022200  | 5.05966700  | -2.18235800 |
| H | 2.71603100  | 5.68841700  | 0.00806600  |
| H | 2.26457700  | 4.30002600  | 2.01950500  |
| I | 3.61707700  | 0.07004700  | 1.72511100  |

### COM<sub>5-R<sub>2</sub></sub>

|    |             |             |            |
|----|-------------|-------------|------------|
| Cu | 1.52708100  | -0.10747800 | 0.08152200 |
| B  | 0.41730900  | 2.32662100  | 0.73132400 |
| C  | -1.94273700 | 1.67075600  | 0.95257200 |

|   |             |             |             |
|---|-------------|-------------|-------------|
| C | 3.50299500  | -2.48241400 | -1.39229700 |
| O | 1.23468200  | 1.76157700  | -0.43265800 |
| O | 1.28377100  | 3.31150200  | 1.31814400  |
| C | 2.14380200  | -1.84528800 | 0.59145500  |
| N | 2.90014800  | -2.74730200 | -0.09524100 |
| N | 1.84922400  | -2.48055500 | 1.75712700  |
| C | 3.05979900  | -3.92461300 | 0.62062700  |
| C | 2.39154400  | -3.75465200 | 1.79109800  |
| C | 2.33462600  | 2.66548800  | -0.66400300 |
| C | 2.59582500  | 3.21778500  | 0.78147900  |
| C | 1.03088400  | -1.90189500 | 2.81844300  |
| H | 0.03492800  | -2.35304000 | 2.81126100  |
| H | 0.94110700  | -0.82934400 | 2.64162000  |
| H | 1.50890800  | -2.08032100 | 3.78444600  |
| H | 4.59295700  | -2.53590600 | -1.32286500 |
| H | 3.20986300  | -1.47849300 | -1.69787800 |
| H | 3.15367600  | -3.20709600 | -2.13329900 |
| C | -3.38795700 | 1.54357300  | 0.78250300  |
| C | -4.09762100 | 0.37745300  | 1.14640500  |
| C | -5.46817200 | 0.27174900  | 0.93678100  |
| C | -6.18090800 | 1.32179500  | 0.34935900  |
| C | -4.12200800 | 2.58613600  | 0.18473100  |
| C | -5.49599800 | 2.47761400  | -0.02541700 |
| H | -3.56325400 | -0.46099200 | 1.58219300  |
| H | -6.03345400 | 3.30215600  | -0.48624900 |
| H | -5.98412400 | -0.64021200 | 1.22512800  |
| H | -7.25021100 | 1.23494800  | 0.18202900  |
| H | -3.60034700 | 3.49051800  | -0.10961500 |
| C | 1.83130800  | 3.74763500  | -1.62595600 |
| H | 2.63125200  | 4.43293400  | -1.92106900 |
| H | 1.43771200  | 3.26217200  | -2.52322100 |
| H | 1.02635000  | 4.32377500  | -1.16545200 |
| C | 3.49806800  | 1.90784700  | -1.29414200 |
| H | 3.20895200  | 1.53758900  | -2.28306700 |
| H | 4.36553800  | 2.56459800  | -1.41651400 |
| H | 3.79724600  | 1.05300800  | -0.68125600 |
| C | 3.23758800  | 4.60474700  | 0.80637300  |
| H | 3.39442900  | 4.91780600  | 1.84254400  |
| H | 4.20937100  | 4.60235000  | 0.30000600  |
| H | 2.59119100  | 5.34247800  | 0.32845500  |
| C | 3.43169900  | 2.25383700  | 1.64180600  |
| H | 4.48025800  | 2.21964500  | 1.32702300  |
| H | 3.39078700  | 2.59787000  | 2.67845400  |
| H | 3.02479700  | 1.23813500  | 1.61465800  |
| C | -1.09795300 | 2.79084400  | 0.38746600  |
| H | -1.26004400 | 2.92204000  | -0.68992300 |
| H | -1.33486200 | 3.75297900  | 0.86253200  |
| C | -1.14461300 | 0.80228000  | 1.60977100  |

|   |             |             |             |
|---|-------------|-------------|-------------|
| O | 0.18900400  | 1.05808100  | 1.60597400  |
| H | -1.44283100 | -0.09371400 | 2.14608400  |
| H | 2.25955400  | -4.41638700 | 2.63208200  |
| H | 3.63055800  | -4.75902800 | 0.24567900  |
| C | -1.78762500 | -0.18718900 | -1.67543700 |
| C | -0.96952000 | -1.30699600 | -1.53793800 |
| C | 0.20726400  | -1.44787300 | -2.27724500 |
| C | 0.57506500  | -0.43251200 | -3.16344400 |
| C | -0.22295700 | 0.70345100  | -3.30035900 |
| C | -1.40158000 | 0.81762800  | -2.56472100 |
| H | -2.70322600 | -0.09059700 | -1.10794500 |
| H | 0.81144600  | -2.33973300 | -2.17320800 |
| H | 1.48858700  | -0.53448900 | -3.74225100 |
| H | 0.07235900  | 1.49605100  | -3.98019800 |
| H | -2.03058200 | 1.69580100  | -2.66432000 |
| I | -1.51813100 | -2.83021000 | -0.16926300 |

### TS26<sub>a</sub>

|    |             |             |             |
|----|-------------|-------------|-------------|
| Cu | -0.88364200 | -0.68705000 | -0.22292700 |
| B  | 0.84233800  | 2.19909300  | 0.49079100  |
| C  | 2.64121100  | 0.72961600  | -0.66548000 |
| C  | -4.11884400 | -0.61815800 | 0.97642800  |
| O  | -0.20622700 | 1.87564600  | 1.35010300  |
| O  | 0.62426700  | 3.40480600  | -0.14722200 |
| C  | -2.67449100 | -0.15353900 | -0.99770100 |
| N  | -3.89879600 | -0.22586100 | -0.40780300 |
| N  | -2.94644300 | 0.21415000  | -2.27666100 |
| C  | -4.91334000 | 0.08888600  | -1.29930500 |
| C  | -4.30849000 | 0.36700000  | -2.48324300 |
| C  | -1.07235100 | 3.03158100  | 1.42870200  |
| C  | -0.74176900 | 3.80023300  | 0.09782600  |
| C  | -1.93082800 | 0.40122100  | -3.31060400 |
| H  | -1.93593300 | -0.44904600 | -3.99862100 |
| H  | -0.96081100 | 0.48741400  | -2.81657000 |
| H  | -2.14428500 | 1.31820000  | -3.86463000 |
| H  | -4.78353100 | 0.09844700  | 1.46483400  |
| H  | -3.15751800 | -0.62251300 | 1.48631700  |
| H  | -4.54975800 | -1.62114900 | 1.02692100  |
| C  | 4.03422600  | 0.36639600  | -0.93145800 |
| C  | 4.47477200  | -0.07057200 | -2.19996200 |
| C  | 5.79265200  | -0.45840100 | -2.41375000 |
| C  | 6.72552400  | -0.41048300 | -1.37350200 |
| C  | 4.99582500  | 0.42840700  | 0.09809300  |
| C  | 6.31684500  | 0.04152800  | -0.11844200 |
| H  | 3.77790900  | -0.08078200 | -3.03155800 |
| H  | 7.03088600  | 0.09463700  | 0.69905600  |
| H  | 6.09959300  | -0.78695700 | -3.40300600 |
| H  | 7.75581000  | -0.70761700 | -1.54423800 |

|   |             |             |             |
|---|-------------|-------------|-------------|
| H | 4.69358400  | 0.76660300  | 1.08267100  |
| C | -0.65788900 | 3.80453000  | 2.68609500  |
| H | -1.30252900 | 4.67028800  | 2.86397100  |
| H | -0.72676300 | 3.13646300  | 3.54893400  |
| H | 0.37638700  | 4.14929300  | 2.60664500  |
| C | -2.51683900 | 2.56358600  | 1.55539200  |
| H | -2.63800700 | 1.99695500  | 2.48384100  |
| H | -3.20106200 | 3.41797500  | 1.58832200  |
| H | -2.79551300 | 1.92272700  | 0.72033000  |
| C | -0.79504700 | 5.32083900  | 0.20560700  |
| H | -0.52943900 | 5.76393600  | -0.75818000 |
| H | -1.80300900 | 5.65870800  | 0.46907600  |
| H | -0.09307500 | 5.69477000  | 0.95242800  |
| C | -1.57712500 | 3.32510400  | -1.09459900 |
| H | -2.62334600 | 3.63536700  | -1.00783300 |
| H | -1.15961800 | 3.75975600  | -2.00691400 |
| H | -1.52656700 | 2.24150600  | -1.18244800 |
| C | 2.28045700  | 1.55264200  | 0.54477300  |
| H | 2.36672600  | 0.93681400  | 1.45091500  |
| H | 3.00434200  | 2.37050800  | 0.66204900  |
| C | 1.60829600  | 0.26951000  | -1.43343300 |
| O | 0.35736000  | 0.57522600  | -1.18536100 |
| H | 1.79842900  | -0.40935300 | -2.27293700 |
| H | -4.71853400 | 0.66243600  | -3.43574300 |
| H | -5.95350500 | 0.09589300  | -1.01521700 |
| C | 1.70347100  | -1.92002400 | 0.64456200  |
| C | 0.40281900  | -1.58340400 | 1.03719700  |
| C | 0.12417400  | -1.17463800 | 2.34892200  |
| C | 1.18158000  | -0.98155800 | 3.23369900  |
| C | 2.49098900  | -1.28050400 | 2.84148200  |
| C | 2.74687600  | -1.76416900 | 1.55714200  |
| H | 1.90076300  | -2.30248500 | -0.34898400 |
| H | -0.89409800 | -0.97950300 | 2.66503300  |
| H | 0.98147000  | -0.60295700 | 4.23149500  |
| H | 3.30824300  | -1.15698300 | 3.54550500  |
| H | 3.76050900  | -1.99878200 | 1.25168000  |
| I | -1.31144500 | -3.26507200 | 0.24419300  |

### 18<sub>a</sub>

|    |             |             |             |
|----|-------------|-------------|-------------|
| Cu | -0.88588800 | -0.78084800 | -0.20276400 |
| B  | 1.04212600  | 2.15173500  | 0.66974200  |
| C  | 2.66702800  | 0.56213500  | -0.55872300 |
| C  | -4.03509400 | -0.18525500 | 1.00269300  |
| O  | -0.04988000 | 1.98254800  | 1.50455000  |
| O  | 0.97905600  | 3.33002800  | -0.04206700 |
| C  | -2.56893500 | 0.02429600  | -1.00014900 |
| N  | -3.77037000 | 0.17911900  | -0.38333100 |
| N  | -2.79711200 | 0.41731200  | -2.27844300 |



|   |             |             |             |
|---|-------------|-------------|-------------|
| C | -4.73274900 | 0.65230500  | -1.26173900 |
| C | -4.11593800 | 0.80262900  | -2.46269000 |
| C | -0.80731800 | 3.21885800  | 1.47760200  |
| C | -0.34964200 | 3.87447000  | 0.12355100  |
| C | -1.78551300 | 0.40508400  | -3.33111000 |
| H | -1.89349300 | -0.49092100 | -3.94877300 |
| H | -0.80835800 | 0.42279700  | -2.84860600 |
| H | -1.90361000 | 1.29408800  | -3.95438000 |
| H | -4.76036900 | 0.51203800  | 1.42697500  |
| H | -3.10551000 | -0.12242000 | 1.56546300  |
| H | -4.40928500 | -1.20946400 | 1.05934800  |
| C | 4.03748800  | 0.16630900  | -0.88604400 |
| C | 4.45226000  | -0.08155600 | -2.21140100 |
| C | 5.74518900  | -0.51035200 | -2.49147200 |
| C | 6.66831600  | -0.69632800 | -1.45863800 |
| C | 4.98789300  | -0.00732700 | 0.14009700  |
| C | 6.28136300  | -0.43880500 | -0.14247100 |
| H | 3.75884400  | 0.09297300  | -3.02751300 |
| H | 6.99034700  | -0.57570100 | 0.66921100  |
| H | 6.04011300  | -0.68785200 | -3.52181500 |
| H | 7.67866400  | -1.02701900 | -1.67943700 |
| H | 4.69367700  | 0.17029900  | 1.16805900  |
| C | -0.37781300 | 4.02109600  | 2.71032800  |
| H | -0.94822400 | 4.94903700  | 2.81040700  |
| H | -0.54457600 | 3.41257100  | 3.60313600  |
| H | 0.68588500  | 4.26861700  | 2.66272200  |
| C | -2.29248700 | 2.89032500  | 1.55391000  |
| H | -2.51437100 | 2.40480500  | 2.50900800  |
| H | -2.89460200 | 3.80259900  | 1.48909400  |
| H | -2.58561500 | 2.22041800  | 0.74704500  |
| C | -0.25231700 | 5.39609800  | 0.14958900  |
| H | 0.09405000  | 5.75611200  | -0.82305800 |
| H | -1.23091900 | 5.84495200  | 0.34980900  |
| H | 0.45325600  | 5.74062800  | 0.90706100  |
| C | -1.17945600 | 3.41574500  | -1.07943100 |
| H | -2.19457700 | 3.82366500  | -1.05190700 |
| H | -0.68988400 | 3.76455800  | -1.99286800 |
| H | -1.22365000 | 2.32831000  | -1.11593800 |
| C | 2.36811700  | 1.30173100  | 0.72089300  |
| H | 2.32908900  | 0.59504500  | 1.55838800  |
| H | 3.19387400  | 1.99199600  | 0.93708600  |
| C | 1.61131700  | 0.18752900  | -1.34733800 |
| O | 0.37221300  | 0.50896000  | -1.06674500 |
| H | 1.77932900  | -0.44112100 | -2.22857200 |
| H | -4.48735200 | 1.15502500  | -3.41152000 |
| H | -5.74815600 | 0.84756300  | -0.95644700 |
| C | 1.64199700  | -2.12642700 | 0.51218100  |
| C | 0.47205000  | -1.53482400 | 0.97659200  |

|   |             |             |             |
|---|-------------|-------------|-------------|
| C | 0.30467000  | -1.22534900 | 2.32529300  |
| C | 1.37884600  | -1.40782900 | 3.20038900  |
| C | 2.57805800  | -1.95726700 | 2.73706500  |
| C | 2.70529000  | -2.32983600 | 1.39877000  |
| H | 1.74302900  | -2.42686400 | -0.52482500 |
| H | -0.62172500 | -0.79771000 | 2.69293500  |
| H | 1.27834900  | -1.11037000 | 4.24033800  |
| H | 3.40404000  | -2.11323800 | 3.42483600  |
| H | 3.62713500  | -2.77467900 | 1.03811900  |
| I | -1.91622100 | -3.15069500 | 0.17807700  |

### COM<sub>3-R<sub>3</sub></sub>

|    |             |             |             |
|----|-------------|-------------|-------------|
| Cu | 0.47256500  | 0.09882700  | -0.18069100 |
| B  | 3.26458500  | 0.64196400  | -1.22060200 |
| C  | 1.04991200  | 1.85572500  | -0.90937800 |
| C  | -0.14794800 | -3.37147300 | -0.35590700 |
| O  | 4.32174200  | 0.78186500  | -0.34471300 |
| O  | 3.03477700  | -0.69087200 | -1.53199400 |
| C  | 0.05970000  | -1.34118300 | 1.05097900  |
| N  | -0.09664100 | -2.68708100 | 0.92522300  |
| N  | -0.07446200 | -1.11789900 | 2.38670200  |
| C  | -0.34418800 | -3.28850600 | 2.14846400  |
| C  | -0.32478900 | -2.29264800 | 3.07372500  |
| C  | 4.61139900  | -0.52454900 | 0.20842800  |
| C  | 4.08475800  | -1.48092800 | -0.92104400 |
| C  | 0.00614400  | 0.21289600  | 2.99202700  |
| H  | -0.51227800 | -4.34834300 | 2.25075800  |
| H  | -0.46113900 | -2.31947500 | 4.14278000  |
| H  | -0.04769600 | 0.10683700  | 4.07636200  |
| H  | -0.81645900 | 0.83341800  | 2.63738000  |
| H  | 0.94305700  | 0.69950500  | 2.71757100  |
| H  | 0.43482200  | -2.79700700 | -1.07556000 |
| H  | -1.18430000 | -3.45261800 | -0.69692300 |
| H  | 0.28435500  | -4.36976700 | -0.26015300 |
| C  | 1.05414700  | 2.59935800  | 0.37128900  |
| C  | 2.20461600  | 2.79177200  | 1.17169500  |
| C  | 2.12281000  | 3.39592100  | 2.42783000  |
| C  | 0.90295500  | 3.84742000  | 2.93496000  |
| C  | -0.16737600 | 3.09495800  | 0.89395700  |
| C  | -0.24294900 | 3.69897300  | 2.14298000  |
| H  | 3.16725300  | 2.44670500  | 0.81382200  |
| H  | -1.20339900 | 4.05974400  | 2.50467700  |
| H  | 0.22802200  | 2.21621600  | -1.53285500 |
| H  | 3.03054400  | 3.52021800  | 3.01476800  |
| H  | 0.84632200  | 4.31944300  | 3.91135400  |
| H  | -1.07109600 | 2.96205300  | 0.30431000  |
| C  | 3.81014600  | -0.63652000 | 1.51054900  |

|   |             |             |             |
|---|-------------|-------------|-------------|
| H | 4.01592200  | -1.57463600 | 2.03476400  |
| H | 4.08007300  | 0.19662600  | 2.16387900  |
| H | 2.73719400  | -0.57165400 | 1.31078500  |
| C | 6.10529400  | -0.61826300 | 0.49299000  |
| H | 6.37443700  | 0.10172800  | 1.27060500  |
| H | 6.37122200  | -1.61907700 | 0.84901200  |
| H | 6.69749000  | -0.39283200 | -0.39524400 |
| C | 3.48613600  | -2.78942900 | -0.41672500 |
| H | 3.12238300  | -3.37810700 | -1.26436900 |
| H | 4.24154600  | -3.38404800 | 0.10727100  |
| H | 2.65112800  | -2.60790000 | 0.26046500  |
| C | 5.12612300  | -1.75568100 | -2.00977600 |
| H | 5.93109000  | -2.40108600 | -1.64636300 |
| H | 4.63643200  | -2.25262500 | -2.85163200 |
| H | 5.56420800  | -0.82278100 | -2.37411600 |
| C | 2.36714800  | 1.81250400  | -1.72981700 |
| H | 2.09870100  | 1.61721000  | -2.77525800 |
| H | 2.89964700  | 2.77641000  | -1.70632900 |
| C | -1.19503500 | -0.52159200 | -2.70328800 |
| C | -2.34149600 | -0.00115100 | -2.11662900 |
| C | -2.78968900 | 1.28839800  | -2.37301300 |
| C | -2.05682200 | 2.07712200  | -3.25966900 |
| C | -0.91116900 | 1.57050700  | -3.87818900 |
| C | -0.48277800 | 0.27311800  | -3.60222300 |
| H | -0.88382300 | -1.53055000 | -2.46809500 |
| H | -3.68477800 | 1.66208400  | -1.89321200 |
| H | -2.38487700 | 3.09056400  | -3.46595500 |
| H | -0.34430600 | 2.19423000  | -4.56116100 |
| H | 0.42115000  | -0.11661700 | -4.05687800 |
| S | -3.25428100 | -0.60984300 | 0.31024600  |
| O | -3.06184500 | -1.88192000 | 0.98515400  |
| O | -2.60044600 | 0.62065100  | 0.72273200  |
| C | -5.09227100 | -0.29251800 | 0.31515500  |
| F | -5.47553600 | -0.12372200 | 1.57911400  |
| F | -5.73220700 | -1.32789300 | -0.21790700 |
| F | -5.36617900 | 0.81192500  | -0.38310700 |
| O | -3.08764100 | -0.88166200 | -1.29492400 |

### TS24<sub>b</sub>

|    |             |             |             |
|----|-------------|-------------|-------------|
| Cu | -0.01780600 | 0.08569500  | -0.22612000 |
| B  | 2.72216000  | -1.04755400 | -0.97172900 |
| C  | 0.62822400  | 0.00371700  | -2.12760800 |
| C  | -0.17851400 | -1.03930700 | 3.06281200  |
| O  | 3.99335900  | -0.51796600 | -0.98042900 |
| O  | 2.39121600  | -1.57393300 | 0.26450900  |
| C  | 0.04500100  | 0.94210600  | 1.58530900  |
| N  | -0.02919400 | 0.38911600  | 2.82466800  |
| N  | 0.02414400  | 2.27953900  | 1.81921000  |

|   |             |             |             |
|---|-------------|-------------|-------------|
| C | -0.12220400 | 1.35818400  | 3.80850400  |
| C | -0.08539400 | 2.55750600  | 3.16959800  |
| C | 4.44783900  | -0.44531500 | 0.39681900  |
| C | 3.60242400  | -1.57617200 | 1.07315300  |
| C | 0.01566200  | 3.27897200  | 0.75336100  |
| H | -0.20725600 | 1.11448000  | 4.85507300  |
| H | -0.12335900 | 3.56464100  | 3.55187600  |
| H | 0.02670500  | 4.27236600  | 1.20361200  |
| H | -0.88300400 | 3.15730200  | 0.14813400  |
| H | 0.89245100  | 3.15816400  | 0.11738500  |
| H | 0.38738800  | -1.57427200 | 2.30319300  |
| H | -1.23088600 | -1.31902900 | 2.99593400  |
| H | 0.22040600  | -1.28421400 | 4.04920000  |
| C | 0.91793300  | 1.43578400  | -2.27523100 |
| C | 2.19534500  | 2.00989900  | -2.07514600 |
| C | 2.38833200  | 3.38751300  | -2.17540600 |
| C | 1.32551500  | 4.23933900  | -2.48378100 |
| C | -0.14409800 | 2.31893100  | -2.59848000 |
| C | 0.05578300  | 3.68854500  | -2.70137700 |
| H | 3.04133300  | 1.37062600  | -1.85757400 |
| H | -0.78124600 | 4.33481500  | -2.95135400 |
| H | -0.24201100 | -0.28764900 | -2.71172600 |
| H | 3.38324200  | 3.79736600  | -2.02054200 |
| H | 1.48265600  | 5.31053000  | -2.56565200 |
| H | -1.13729700 | 1.90401600  | -2.74054500 |
| C | 4.08923800  | 0.95299500  | 0.91288400  |
| H | 4.46068900  | 1.11080100  | 1.92933500  |
| H | 4.54554300  | 1.70088800  | 0.25961200  |
| H | 3.00767200  | 1.11205600  | 0.90510200  |
| C | 5.95550900  | -0.65824500 | 0.42786000  |
| H | 6.45346800  | 0.17017900  | -0.08300600 |
| H | 6.32038900  | -0.69028700 | 1.45949200  |
| H | 6.23944600  | -1.58455600 | -0.07368700 |
| C | 3.24396100  | -1.31047500 | 2.52902800  |
| H | 2.68191100  | -2.15534900 | 2.93601000  |
| H | 4.15279100  | -1.19439000 | 3.12813700  |
| H | 2.63880200  | -0.40969900 | 2.63282900  |
| C | 4.22472100  | -2.96670100 | 0.92162700  |
| H | 5.10661600  | -3.08476000 | 1.55750900  |
| H | 3.48516100  | -3.71763000 | 1.21170500  |
| H | 4.51343600  | -3.15652900 | -0.11542400 |
| C | 1.75861400  | -1.03025700 | -2.21119200 |
| H | 1.28767500  | -2.01608500 | -2.28573100 |
| H | 2.35066700  | -0.88356100 | -3.12834400 |
| C | -0.66093800 | -2.84947300 | -0.23730700 |
| C | -1.31202800 | -1.71696300 | -0.72079400 |
| C | -2.03865500 | -1.72283800 | -1.91181000 |
| C | -1.95019300 | -2.85219500 | -2.72227100 |

|   |             |             |             |
|---|-------------|-------------|-------------|
| C | -1.21656300 | -3.97386600 | -2.31756100 |
| C | -0.58141500 | -3.96525900 | -1.07379900 |
| H | -0.17184900 | -2.84730300 | 0.72645800  |
| H | -2.59974600 | -0.84983500 | -2.21850300 |
| H | -2.46732800 | -2.85332200 | -3.67778500 |
| H | -1.16239000 | -4.85049000 | -2.95433000 |
| H | -0.01922600 | -4.83240200 | -0.73869500 |
| S | -3.00701000 | 0.35621500  | 0.61701100  |
| O | -3.07243500 | 0.98626600  | 1.93529900  |
| O | -2.61263500 | 1.15915000  | -0.55054200 |
| C | -4.73961200 | -0.22212500 | 0.26007700  |
| F | -5.55175500 | 0.83772700  | 0.21789600  |
| F | -5.14917500 | -1.05432000 | 1.21956300  |
| F | -4.78982100 | -0.85503500 | -0.91698200 |
| O | -2.24574500 | -0.99544400 | 0.69231300  |

### 16<sub>b</sub>

|    |             |             |             |
|----|-------------|-------------|-------------|
| Cu | -0.63949800 | 0.28617800  | 0.29058600  |
| B  | 3.15719300  | -1.53901400 | 0.21277600  |
| C  | 0.78933400  | -2.71969400 | 0.85284900  |
| C  | 1.41035200  | 2.46730200  | 1.89139700  |
| O  | 3.70896800  | -1.49360800 | -1.04346400 |
| O  | 3.51279800  | -0.44927900 | 0.98105000  |
| C  | 0.28446200  | 1.91572700  | -0.24346600 |
| N  | 1.04590700  | 2.75455200  | 0.50951200  |
| N  | 0.11570500  | 2.58490000  | -1.41617700 |
| C  | 1.34002200  | 3.92498500  | -0.17235300 |
| C  | 0.75159000  | 3.81495700  | -1.39343100 |
| C  | 4.34466900  | -0.19601200 | -1.20638700 |
| C  | 4.60356200  | 0.22321900  | 0.28082000  |
| C  | -0.71709700 | 2.10920100  | -2.51924900 |
| H  | 1.93106100  | 4.71560100  | 0.26120900  |
| H  | 0.72960800  | 4.49255200  | -2.23179000 |
| H  | -1.66649100 | 2.64857200  | -2.53784900 |
| H  | -0.93963900 | 1.05720400  | -2.35589800 |
| H  | -0.18317900 | 2.24421200  | -3.46322000 |
| H  | 1.81181100  | 1.45646000  | 1.95530400  |
| H  | 0.53142900  | 2.54435100  | 2.53422200  |
| H  | 2.16732500  | 3.18324700  | 2.21553400  |
| C  | 0.07683900  | -2.63796900 | -0.48958300 |
| C  | 0.44807200  | -1.70528400 | -1.46777100 |
| C  | -0.24614900 | -1.62334100 | -2.67511100 |
| C  | -1.33962400 | -2.45233300 | -2.91662200 |
| C  | -1.01207700 | -3.47631800 | -0.75228700 |
| C  | -1.72162100 | -3.38080100 | -1.94942900 |
| H  | 1.30366800  | -1.06410800 | -1.31180500 |
| H  | -2.57261100 | -4.03166500 | -2.12487000 |
| H  | 0.48673400  | -3.68043000 | 1.29227200  |

|   |             |             |             |
|---|-------------|-------------|-------------|
| H | 0.06942500  | -0.90487800 | -3.42574400 |
| H | -1.89092700 | -2.37423000 | -3.84810500 |
| H | -1.31264500 | -4.20628700 | -0.00487100 |
| C | 3.33774900  | 0.71259800  | -1.91854100 |
| H | 3.77443600  | 1.68617000  | -2.15765700 |
| H | 3.03104200  | 0.23385600  | -2.85232900 |
| H | 2.44690700  | 0.87485300  | -1.30759000 |
| C | 5.59755700  | -0.37329900 | -2.05433600 |
| H | 5.31573700  | -0.68133200 | -3.06462700 |
| H | 6.15119200  | 0.56830500  | -2.12784400 |
| H | 6.25765800  | -1.13665600 | -1.64000500 |
| C | 4.53375300  | 1.72047700  | 0.54371100  |
| H | 4.65992000  | 1.91479000  | 1.61237300  |
| H | 5.33951400  | 2.23347600  | 0.00895600  |
| H | 3.58344400  | 2.14395900  | 0.22295200  |
| C | 5.90204800  | -0.35351800 | 0.85286800  |
| H | 6.78185900  | 0.13821300  | 0.42895100  |
| H | 5.90943900  | -0.20335500 | 1.93550300  |
| H | 5.97564900  | -1.42664300 | 0.65727100  |
| C | 2.33456700  | -2.78781400 | 0.71562400  |
| H | 2.74976600  | -3.08554500 | 1.68651500  |
| H | 2.55297500  | -3.61092100 | 0.02702500  |
| C | 1.08990100  | -1.12709000 | 2.84638900  |
| C | 0.27815100  | -1.65642200 | 1.83054100  |
| C | -1.08450100 | -1.27304900 | 1.80108400  |
| C | -1.59147000 | -0.34869900 | 2.73306500  |
| C | -0.76291300 | 0.16469800  | 3.72990300  |
| C | 0.57050700  | -0.24404300 | 3.79250600  |
| H | 2.13809700  | -1.39149800 | 2.89599900  |
| H | -1.77052700 | -1.73563900 | 1.09985400  |
| H | -2.62798400 | -0.04501000 | 2.65953200  |
| H | -1.15716300 | 0.87117000  | 4.45368500  |
| H | 1.22164000  | 0.14493500  | 4.57047500  |
| S | -3.46271100 | 0.94287400  | -0.44001900 |
| O | -3.97288900 | 1.68828500  | -1.59885900 |
| O | -2.43552000 | -0.10675900 | -0.78735400 |
| C | -4.86419700 | -0.12681200 | 0.13382000  |
| F | -5.28647800 | -0.93359100 | -0.84645500 |
| F | -5.89321000 | 0.61524000  | 0.55698700  |
| F | -4.45020600 | -0.89958500 | 1.16323500  |
| O | -3.09078700 | 1.72354400  | 0.76021000  |

### COM<sub>4-R<sub>3</sub></sub>

|    |             |             |             |
|----|-------------|-------------|-------------|
| Cu | 0.34818300  | 0.41478900  | 0.86941800  |
| B  | 4.00163500  | 0.84893800  | -0.08883900 |
| C  | 1.96174800  | 2.18920900  | -0.85803400 |
| C  | -0.13598900 | -2.19679200 | 3.03496600  |

|   |             |             |             |
|---|-------------|-------------|-------------|
| O | 4.71017800  | 0.57196600  | -1.22679700 |
| O | 4.03576900  | -0.17569800 | 0.82992600  |
| C | -0.82085000 | 0.10086900  | 2.39218900  |
| N | -1.00497700 | -1.03119500 | 3.12189000  |
| N | -1.84748000 | 0.90967700  | 2.76278800  |
| C | -2.13521900 | -0.94021200 | 3.91997100  |
| C | -2.66910200 | 0.28942700  | 3.68896000  |
| C | 5.37429200  | -0.70491300 | -1.04849200 |
| C | 4.59194800  | -1.34123200 | 0.16645200  |
| C | -2.09646900 | 2.21989400  | 2.16410700  |
| H | -2.44541100 | -1.73389000 | 4.58073400  |
| H | -3.54024100 | 0.77055300  | 4.10426900  |
| H | -2.43704100 | 2.91362600  | 2.93580800  |
| H | -2.84206000 | 2.14094900  | 1.37084200  |
| H | -1.16764100 | 2.58936200  | 1.73193200  |
| H | -0.69027900 | -3.05398100 | 2.64673400  |
| H | 0.27876800  | -2.43433300 | 4.01828900  |
| H | 0.67435400  | -1.95819600 | 2.34682600  |
| C | 0.90417000  | 3.22976500  | -0.54185300 |
| C | 1.03764800  | 4.18867000  | 0.46986200  |
| C | -0.00108300 | 5.07791600  | 0.75896900  |
| C | -1.20099800 | 5.01436600  | 0.04990800  |
| C | -0.31218100 | 3.17682200  | -1.24562400 |
| C | -1.35285800 | 4.05637300  | -0.95557600 |
| H | 1.96035200  | 4.24889200  | 1.03658200  |
| H | -2.28749000 | 3.97698600  | -1.50090700 |
| H | 2.33056300  | 2.32882200  | -1.88245000 |
| H | 0.13043400  | 5.82070900  | 1.54129300  |
| H | -2.00978100 | 5.70262400  | 0.27836100  |
| H | -0.44367600 | 2.42413600  | -2.01727900 |
| C | 6.84039300  | -0.39368700 | -0.73365300 |
| H | 7.43714000  | -1.30534500 | -0.63705800 |
| H | 7.25492000  | 0.20673700  | -1.54751200 |
| H | 6.93106500  | 0.18275000  | 0.19095800  |
| C | 5.26302200  | -1.48289100 | -2.35531100 |
| H | 5.81874300  | -0.96103000 | -3.13910400 |
| H | 5.68474500  | -2.48801800 | -2.24971000 |
| H | 4.22354800  | -1.56354600 | -2.67545900 |
| C | 5.46454300  | -2.09669800 | 1.16311800  |
| H | 4.84194600  | -2.48153500 | 1.97587200  |
| H | 5.95723400  | -2.94703700 | 0.68058200  |
| H | 6.22879700  | -1.45160300 | 1.59888600  |
| C | 3.40492900  | -2.21254500 | -0.26040600 |
| H | 3.74379000  | -3.14136100 | -0.72990900 |
| H | 2.82414200  | -2.46973700 | 0.63038200  |
| H | 2.74555800  | -1.67847000 | -0.94655400 |
| C | 3.16261200  | 2.16022700  | 0.12100200  |
| H | 3.77551200  | 3.05814000  | -0.02273000 |

|   |             |             |             |
|---|-------------|-------------|-------------|
| H | 2.79244600  | 2.17347100  | 1.15254100  |
| C | 1.27616200  | 0.79577200  | -0.78882200 |
| O | 1.35441600  | 0.07210200  | -1.78769100 |
| C | -2.59329600 | -2.93273000 | 0.43503100  |
| C | -1.86843200 | -1.91164500 | -0.17038600 |
| C | -0.61150800 | -2.10377200 | -0.73416900 |
| C | -0.07555300 | -3.39426800 | -0.67821600 |
| C | -0.77389900 | -4.44027300 | -0.07276100 |
| C | -2.03565200 | -4.21073000 | 0.48323200  |
| H | -3.56842100 | -2.71536300 | 0.85628500  |
| H | -0.05581200 | -1.29939200 | -1.21568400 |
| H | 0.90321200  | -3.56905300 | -1.11215800 |
| H | -0.33959800 | -5.43463900 | -0.03744400 |
| H | -2.58774200 | -5.02162600 | 0.94805400  |
| S | -2.93092400 | 0.18241700  | -1.41578100 |
| O | -3.38070900 | 1.47280500  | -0.92438200 |
| O | -2.00667100 | 0.02729700  | -2.52192100 |
| C | -4.46341800 | -0.80658600 | -1.82762700 |
| F | -5.15800600 | -0.14344200 | -2.74867900 |
| F | -5.20538700 | -0.95781700 | -0.72806900 |
| F | -4.11799900 | -2.00380200 | -2.29690000 |
| O | -2.44333300 | -0.61943500 | -0.08396700 |

### TS25<sub>b</sub>

|    |             |             |             |
|----|-------------|-------------|-------------|
| Cu | 0.01401500  | 0.27821300  | 0.36488000  |
| B  | 3.29854100  | 1.04827000  | -0.67371400 |
| C  | 1.09905100  | 1.82087000  | -1.78901000 |
| C  | 1.73495700  | 0.26000900  | 3.36608700  |
| O  | 4.10171700  | 0.58174100  | -1.67390400 |
| O  | 3.43442100  | 0.34218900  | 0.50164300  |
| C  | -0.21235400 | 1.18259400  | 2.13306900  |
| N  | 0.52779400  | 1.07336400  | 3.26895100  |
| N  | -1.25286100 | 1.97995800  | 2.48638300  |
| C  | -0.04585900 | 1.77777100  | 4.31529300  |
| C  | -1.17382400 | 2.35277600  | 3.81689100  |
| C  | 4.96383200  | -0.44927000 | -1.11616300 |
| C  | 4.20370400  | -0.86177700 | 0.20047400  |
| C  | -2.33810100 | 2.35376100  | 1.57993500  |
| H  | 0.39654600  | 1.82093000  | 5.29763500  |
| H  | -1.90566600 | 2.99356500  | 4.28208700  |
| H  | -2.65230400 | 3.37500300  | 1.80032900  |
| H  | -3.17901900 | 1.66630200  | 1.67695300  |
| H  | -1.97477300 | 2.30940900  | 0.55701300  |
| H  | 1.47815100  | -0.77600000 | 3.60820600  |
| H  | 2.37805400  | 0.66440100  | 4.15031200  |
| H  | 2.26350500  | 0.28865700  | 2.41265500  |
| C  | -0.13341900 | 2.70135200  | -1.67026800 |
| C  | -0.10149500 | 3.97105500  | -1.07957500 |



|   |             |             |             |
|---|-------------|-------------|-------------|
| C | -1.25985400 | 4.74531300  | -0.98962900 |
| C | -2.47496300 | 4.25436800  | -1.46983100 |
| C | -1.36055800 | 2.22164300  | -2.15587300 |
| C | -2.52260100 | 2.98547700  | -2.04918400 |
| H | 0.83132700  | 4.36474200  | -0.69109600 |
| H | -3.46303200 | 2.57283900  | -2.39771500 |
| H | 1.46419900  | 1.82719600  | -2.82395800 |
| H | -1.21116000 | 5.73234100  | -0.53803600 |
| H | -3.37789900 | 4.85193700  | -1.38664300 |
| H | -1.41949000 | 1.23415300  | -2.60032200 |
| C | 6.31906100  | 0.21305000  | -0.85562000 |
| H | 7.05694000  | -0.50779400 | -0.49230700 |
| H | 6.68705000  | 0.64279600  | -1.79063700 |
| H | 6.22998100  | 1.02087800  | -0.12402900 |
| C | 5.10127000  | -1.56409100 | -2.14598300 |
| H | 5.62439400  | -1.18474300 | -3.02773600 |
| H | 5.68032400  | -2.39885500 | -1.73811200 |
| H | 4.12432200  | -1.93125300 | -2.46226400 |
| C | 5.10335300  | -1.16791500 | 1.39213900  |
| H | 4.48823900  | -1.42973200 | 2.25810000  |
| H | 5.75322300  | -2.02100400 | 1.17385100  |
| H | 5.72643800  | -0.31358700 | 1.66097300  |
| C | 3.19113200  | -1.98910800 | -0.00506400 |
| H | 3.69197900  | -2.94606200 | -0.17597200 |
| H | 2.57373200  | -2.08662900 | 0.89074400  |
| H | 2.52454600  | -1.78706300 | -0.84381700 |
| C | 2.26309200  | 2.21688500  | -0.84108800 |
| H | 2.75035600  | 3.11398800  | -1.23992000 |
| H | 1.85716400  | 2.47076200  | 0.14396800  |
| C | 0.70255700  | 0.34024900  | -1.48192200 |
| O | 0.91695800  | -0.51872900 | -2.30756600 |
| C | -0.42506000 | -2.22360200 | 1.57350500  |
| C | -0.60215700 | -1.75182700 | 0.27284100  |
| C | -0.40707400 | -2.52267100 | -0.86167300 |
| C | 0.17242300  | -3.78157400 | -0.67484100 |
| C | 0.47216000  | -4.25571000 | 0.60453500  |
| C | 0.17123400  | -3.47663500 | 1.72699800  |
| H | -0.72668400 | -1.62510400 | 2.42470900  |
| H | -0.63912200 | -2.14076700 | -1.84514600 |
| H | 0.38177600  | -4.39350800 | -1.54739000 |
| H | 0.90925200  | -5.24110600 | 0.72991100  |
| H | 0.37051800  | -3.85114000 | 2.72717700  |
| S | -3.23614900 | -0.62198600 | -0.72312000 |
| O | -4.17167700 | 0.47492600  | -0.46476400 |
| O | -2.64828700 | -0.76967000 | -2.05597700 |
| C | -4.19659800 | -2.18581300 | -0.42668600 |
| F | -5.16862200 | -2.29190200 | -1.33706100 |
| F | -4.74148200 | -2.16379100 | 0.79415000  |

|                       |             |             |             |
|-----------------------|-------------|-------------|-------------|
| F                     | -3.39091800 | -3.24922500 | -0.52246800 |
| O                     | -2.19468300 | -0.69862900 | 0.42211700  |
| <b>17<sub>b</sub></b> |             |             |             |
| Cu                    | -1.83795600 | 0.43075900  | 0.85347400  |
| B                     | 4.35788500  | 0.50497400  | -0.63004000 |
| C                     | 1.93362500  | 0.42258000  | -1.47088400 |
| C                     | -0.06359400 | 3.40241000  | 1.47068700  |
| O                     | 5.06218500  | -0.25009700 | -1.52194800 |
| O                     | 4.79560200  | 0.37654000  | 0.66432700  |
| C                     | -2.20252100 | 2.33234200  | 0.79538800  |
| N                     | -1.44078800 | 3.43718900  | 1.00779900  |
| N                     | -3.39746900 | 2.82776900  | 0.37099100  |
| C                     | -2.13346500 | 4.59723400  | 0.69994600  |
| C                     | -3.37162800 | 4.20929600  | 0.29460500  |
| C                     | 6.17705300  | -0.85695500 | -0.80634700 |
| C                     | 5.71750000  | -0.75590200 | 0.69778000  |
| C                     | -4.52366200 | 1.99468300  | -0.04524300 |
| H                     | -1.69779100 | 5.57767300  | 0.80693400  |
| H                     | -4.22348200 | 4.78688400  | -0.02713200 |
| H                     | -4.50167300 | 1.83036900  | -1.12419100 |
| H                     | -5.45692400 | 2.48466200  | 0.23954800  |
| H                     | -4.44844700 | 1.02443500  | 0.44245100  |
| H                     | 0.03630900  | 3.96364300  | 2.40402200  |
| H                     | 0.59808700  | 3.82671700  | 0.71224800  |
| H                     | 0.21216500  | 2.36420200  | 1.64067700  |
| C                     | 0.61481500  | 1.13186900  | -1.75975100 |
| C                     | 0.51441000  | 2.52450100  | -1.83971700 |
| C                     | -0.69139500 | 3.13520800  | -2.19364300 |
| C                     | -1.81703600 | 2.36064700  | -2.46373800 |
| C                     | -0.53003300 | 0.36184200  | -2.02377000 |
| C                     | -1.73732000 | 0.96916200  | -2.37149800 |
| H                     | 1.38473000  | 3.14280900  | -1.64909800 |
| H                     | -2.60837800 | 0.35057400  | -2.55868900 |
| H                     | 2.25876800  | -0.07339600 | -2.39226200 |
| H                     | -0.74686300 | 4.21805700  | -2.25735300 |
| H                     | -2.75283800 | 2.83703700  | -2.74044000 |
| H                     | -0.49188000 | -0.72220300 | -1.97706300 |
| C                     | 7.40995500  | -0.00782000 | -1.12452600 |
| H                     | 8.31472500  | -0.42835500 | -0.67689700 |
| H                     | 7.54415200  | 0.02582600  | -2.20859300 |
| H                     | 7.28774300  | 1.01775300  | -0.76555200 |
| C                     | 6.35638800  | -2.27867600 | -1.32374400 |
| H                     | 6.66312500  | -2.25080300 | -2.37260900 |
| H                     | 7.13135400  | -2.80286100 | -0.75551100 |
| H                     | 5.42533200  | -2.84243400 | -1.25720600 |
| C                     | 6.82972000  | -0.44255300 | 1.69081200  |
| H                     | 6.41059300  | -0.36828500 | 2.69791000  |

|   |             |             |             |
|---|-------------|-------------|-------------|
| H | 7.57769200  | -1.24144000 | 1.69342000  |
| H | 7.32626200  | 0.50076400  | 1.45877600  |
| C | 4.90492100  | -1.96363800 | 1.17308300  |
| H | 5.54008600  | -2.84554400 | 1.29351200  |
| H | 4.45784800  | -1.72761200 | 2.14242200  |
| H | 4.09629400  | -2.20647900 | 0.48080900  |
| C | 3.09111000  | 1.34968300  | -1.02050200 |
| H | 3.32757600  | 2.01577400  | -1.85792600 |
| H | 2.77385000  | 1.98215500  | -0.18598800 |
| C | 1.71936700  | -0.75626200 | -0.50986500 |
| O | 1.97531800  | -1.89378600 | -0.86776800 |
| C | 1.75086900  | 0.24447000  | 1.84226600  |
| C | 1.13207800  | -0.53839300 | 0.85945600  |
| C | -0.04232000 | -1.25037300 | 1.17282900  |
| C | -0.61955400 | -1.12227800 | 2.44487800  |
| C | -0.00386000 | -0.32259100 | 3.41759600  |
| C | 1.18785000  | 0.33651800  | 3.11913300  |
| H | 2.69603800  | 0.73094900  | 1.63841900  |
| H | -0.48902800 | -1.90656000 | 0.43138300  |
| H | -1.53061200 | -1.66778100 | 2.66662200  |
| H | -0.44574100 | -0.23647700 | 4.40536800  |
| H | 1.68648900  | 0.92901500  | 3.88057500  |
| S | -3.39854700 | -1.77294600 | -0.61993000 |
| O | -4.29016600 | -0.99699600 | -1.49837000 |
| O | -2.16039700 | -2.30576100 | -1.21696300 |
| C | -4.37589700 | -3.26376300 | -0.11106000 |
| F | -4.67800600 | -4.00208100 | -1.18383100 |
| F | -5.51255700 | -2.89147300 | 0.49195500  |
| F | -3.66287200 | -4.01216200 | 0.74179700  |
| O | -3.16792000 | -1.12009100 | 0.72870900  |

### COM<sub>5-R<sub>3</sub></sub>

|    |             |             |             |
|----|-------------|-------------|-------------|
| Cu | -1.32528500 | -0.04918400 | 1.32261500  |
| B  | -2.67798100 | 1.22796200  | -0.96555300 |
| C  | -0.62768100 | 2.55038700  | -0.83426100 |
| C  | 1.32370100  | 1.81213900  | 2.29261100  |
| O  | -2.80323300 | 0.22918300  | 0.20591100  |
| O  | -3.97189400 | 1.15652600  | -1.57579200 |
| C  | 0.22774300  | -0.42845800 | 2.34810000  |
| N  | 1.28003700  | 0.38646100  | 2.60852800  |
| N  | 0.62825000  | -1.65403500 | 2.78568100  |
| C  | 2.33198100  | -0.31745400 | 3.16704400  |
| C  | 1.91970000  | -1.60837700 | 3.28483300  |
| C  | -4.16120400 | -0.24426000 | 0.28879200  |
| C  | -4.62698400 | -0.04644100 | -1.19697700 |
| C  | -0.21649800 | -2.84067500 | 2.77266600  |
| H  | -0.96843300 | -2.72378000 | 1.99268800  |

|   |             |             |             |
|---|-------------|-------------|-------------|
| H | -0.71014800 | -2.97207000 | 3.73979700  |
| H | 0.38883500  | -3.71747100 | 2.54301000  |
| H | 0.36470500  | 2.10317100  | 1.87112500  |
| H | 2.10118400  | 2.00883700  | 1.55543400  |
| H | 1.51234600  | 2.38541800  | 3.20325000  |
| C | 0.41499600  | 3.49959200  | -0.45745600 |
| C | 1.77136100  | 3.32555200  | -0.81410800 |
| C | 2.75236400  | 4.20775700  | -0.37815400 |
| C | 2.42041400  | 5.30343800  | 0.42692100  |
| C | 0.09877900  | 4.61624100  | 0.34128800  |
| C | 1.08515200  | 5.50123800  | 0.77730300  |
| H | 2.06482600  | 2.47702800  | -1.42066800 |
| H | 0.80519200  | 6.35078200  | 1.39475700  |
| H | 3.78697000  | 4.03593500  | -0.66271500 |
| H | 3.18941800  | 5.98972300  | 0.76842500  |
| H | -0.93563600 | 4.78257400  | 0.62272000  |
| C | -4.91198200 | 0.66166100  | 1.26893500  |
| H | -5.93756400 | 0.31935300  | 1.43592800  |
| H | -4.38689400 | 0.65773500  | 2.22985300  |
| H | -4.93684500 | 1.68673500  | 0.89358000  |
| C | -4.15878700 | -1.68622300 | 0.78606700  |
| H | -3.81613600 | -1.72082900 | 1.82682000  |
| H | -5.16638000 | -2.11303200 | 0.75246800  |
| H | -3.49445800 | -2.30990900 | 0.18533500  |
| C | -6.13403700 | 0.14872300  | -1.35037900 |
| H | -6.37751900 | 0.27174600  | -2.40934300 |
| H | -6.68893600 | -0.71660500 | -0.97139100 |
| H | -6.46975000 | 1.04356800  | -0.82388000 |
| C | -4.15565000 | -1.19114300 | -2.10994600 |
| H | -4.68764200 | -2.12752200 | -1.90972800 |
| H | -4.34124800 | -0.90185300 | -3.14729600 |
| H | -3.08188900 | -1.35038300 | -1.99950500 |
| C | -2.09988900 | 2.66933800  | -0.48787000 |
| H | -2.27449200 | 2.85204400  | 0.58184100  |
| H | -2.56649100 | 3.50643600  | -1.02609000 |
| C | -0.45327600 | 1.43010000  | -1.58003200 |
| O | -1.53249400 | 0.65924600  | -1.80787200 |
| H | 0.47133400  | 1.07682100  | -2.02494500 |
| H | 2.42272900  | -2.48003900 | 3.67107100  |
| H | 3.27164400  | 0.15107900  | 3.40970700  |
| C | -0.18258400 | -2.16338100 | -0.98464000 |
| C | 1.07668200  | -2.27297200 | -0.40344400 |
| C | 1.61221800  | -3.49107200 | 0.00455400  |
| C | 0.85383800  | -4.64576200 | -0.20167400 |
| C | -0.41570700 | -4.57043200 | -0.77596800 |
| C | -0.92853500 | -3.33078100 | -1.16207100 |
| H | -0.58166200 | -1.19799500 | -1.28628400 |
| H | 2.58927400  | -3.53868200 | 0.46408200  |

|   |             |             |             |
|---|-------------|-------------|-------------|
| H | 1.26192700  | -5.60588800 | 0.09870600  |
| H | -0.99995400 | -5.47268200 | -0.92567600 |
| H | -1.91206600 | -3.25942500 | -1.61413000 |
| S | 3.31604600  | -0.76952700 | -0.33941500 |
| O | 3.53933700  | 0.56086700  | 0.19257500  |
| O | 4.11674600  | -1.91284900 | 0.07020300  |
| C | 3.42904500  | -0.67268400 | -2.20214400 |
| F | 4.70584500  | -0.50313900 | -2.53121500 |
| F | 2.70948400  | 0.35393100  | -2.65144500 |
| F | 2.96869300  | -1.80605100 | -2.72800700 |
| O | 1.72466300  | -1.03269800 | -0.15999900 |

**TS26<sub>b</sub>**

|    |             |             |             |
|----|-------------|-------------|-------------|
| Cu | -0.13634700 | -0.14986800 | 0.14788700  |
| B  | -3.10088800 | -0.14501700 | -0.27845400 |
| C  | -1.82320100 | 2.06130000  | -0.93057300 |
| C  | 1.20860100  | 2.74001000  | 1.32401300  |
| O  | -2.59790200 | -1.07135700 | 0.63193900  |
| O  | -3.98769200 | -0.71118600 | -1.15579500 |
| C  | 0.24387500  | 0.52790100  | 1.95469800  |
| N  | 0.81497000  | 1.71281600  | 2.28323500  |
| N  | 0.04530700  | -0.09599500 | 3.14522100  |
| C  | 0.99382600  | 1.82131700  | 3.65013100  |
| C  | 0.50582000  | 0.67690700  | 4.19848700  |
| C  | -3.28589000 | -2.33647100 | 0.40500100  |
| C  | -3.88351900 | -2.15226200 | -1.04091100 |
| C  | -0.58920900 | -1.40179900 | 3.27846300  |
| H  | -1.39628600 | -1.46458700 | 2.55001800  |
| H  | -0.99264800 | -1.49886600 | 4.28779600  |
| H  | 0.13126100  | -2.20254300 | 3.09440200  |
| H  | 0.84786200  | 2.44604100  | 0.34219200  |
| H  | 2.29460000  | 2.82803400  | 1.28979700  |
| H  | 0.75024100  | 3.69333400  | 1.59443400  |
| C  | -1.66186700 | 3.51971800  | -0.90901900 |
| C  | -0.50615600 | 4.15898300  | -1.41849200 |
| C  | -0.36043600 | 5.53969300  | -1.36828500 |
| C  | -1.35375300 | 6.34009400  | -0.79571600 |
| C  | -2.64411000 | 4.34673700  | -0.32571200 |
| C  | -2.49384300 | 5.73102100  | -0.27306700 |
| H  | 0.30084800  | 3.56940700  | -1.83924200 |
| H  | -3.27474100 | 6.33534200  | 0.17997600  |
| H  | 0.54186000  | 5.99378400  | -1.76761600 |
| H  | -1.23445100 | 7.41825900  | -0.75190500 |
| H  | -3.54101500 | 3.90108300  | 0.08759500  |
| C  | -4.35638400 | -2.43739500 | 1.49532300  |
| H  | -4.90172700 | -3.38362600 | 1.43945100  |
| H  | -3.87463100 | -2.37754000 | 2.47542200  |
| H  | -5.07339300 | -1.61584200 | 1.42010600  |

|   |             |             |             |
|---|-------------|-------------|-------------|
| C | -2.28355000 | -3.47660800 | 0.53498000  |
| H | -1.93180400 | -3.55497400 | 1.56747100  |
| H | -2.75291900 | -4.42986000 | 0.27176300  |
| H | -1.41883400 | -3.32372400 | -0.10861700 |
| C | -5.27390200 | -2.74953800 | -1.23351000 |
| H | -5.61805900 | -2.54223900 | -2.25006000 |
| H | -5.25229300 | -3.83574000 | -1.09751300 |
| H | -5.99862300 | -2.32287300 | -0.53835700 |
| C | -2.94691700 | -2.62926400 | -2.15424300 |
| H | -2.83798100 | -3.71780400 | -2.14688100 |
| H | -3.37177800 | -2.33116900 | -3.11641600 |
| H | -1.96755400 | -2.16209700 | -2.06341100 |
| C | -2.93804900 | 1.41838000  | -0.12610000 |
| H | -2.82484100 | 1.67037400  | 0.93795800  |
| H | -3.89413600 | 1.86063900  | -0.43856900 |
| C | -0.99177700 | 1.25426700  | -1.67548100 |
| O | -1.00098000 | -0.06091300 | -1.59173400 |
| H | -0.25498600 | 1.68784600  | -2.35666700 |
| H | 0.43729600  | 0.35474800  | 5.22497700  |
| H | 1.43741200  | 2.69191200  | 4.10536400  |
| C | 0.77969200  | -2.38285500 | -1.50611500 |
| C | 1.11402200  | -1.72239600 | -0.33193600 |
| C | 1.69225300  | -2.33036400 | 0.77276700  |
| C | 1.76974700  | -3.72786600 | 0.75397400  |
| C | 1.36261800  | -4.44881400 | -0.37045300 |
| C | 0.87903900  | -3.77598600 | -1.49781100 |
| H | 0.40951000  | -1.82875700 | -2.35855100 |
| H | 2.07538200  | -1.74357200 | 1.59706000  |
| H | 2.17827100  | -4.24324700 | 1.61862600  |
| H | 1.44857300  | -5.53058400 | -0.38041900 |
| H | 0.58055300  | -4.33084200 | -2.38252000 |
| S | 3.30658900  | 0.47194100  | -0.27555600 |
| O | 3.63434800  | 1.83148500  | -0.71239100 |
| O | 3.36997700  | 0.16514000  | 1.16022200  |
| C | 4.56856200  | -0.63493900 | -1.07160900 |
| F | 5.78200900  | -0.34687300 | -0.59073800 |
| F | 4.56813300  | -0.45858000 | -2.39510700 |
| F | 4.29190300  | -1.91855500 | -0.80562700 |
| O | 2.00460000  | -0.01196900 | -0.94273700 |

**18<sub>b</sub>**

|    |             |             |             |
|----|-------------|-------------|-------------|
| Cu | 0.07804900  | -0.24213600 | 0.03467800  |
| B  | -2.88427200 | 1.21192400  | -0.30371800 |
| C  | -0.45702700 | 2.16330100  | -0.69399400 |
| C  | 2.28999400  | 1.62256500  | 1.91579700  |
| O  | -3.30843400 | 0.14216200  | 0.45619800  |
| O  | -3.71872300 | 1.48308900  | -1.35511000 |
| C  | 0.30819200  | 0.08074400  | 1.95361500  |

|   |             |             |             |
|---|-------------|-------------|-------------|
| N | 1.26112100  | 0.81936300  | 2.57301700  |
| N | -0.42887800 | -0.45895800 | 2.96074800  |
| C | 1.13782400  | 0.73110400  | 3.94663000  |
| C | 0.07154600  | -0.07460200 | 4.19213800  |
| C | -4.64822400 | -0.20612400 | -0.00537900 |
| C | -4.66843500 | 0.38783100  | -1.46128800 |
| C | -1.58475600 | -1.34288000 | 2.80551000  |
| H | -2.17017800 | -1.02325600 | 1.94552400  |
| H | -2.19400400 | -1.26079400 | 3.70764600  |
| H | -1.25543900 | -2.37408000 | 2.67027400  |
| H | 2.11475100  | 1.60410800  | 0.84784600  |
| H | 3.27207000  | 1.19600600  | 2.11554800  |
| H | 2.22592900  | 2.65356100  | 2.27006400  |
| C | 0.53745600  | 3.23362400  | -0.56988500 |
| C | 1.83245600  | 3.09248100  | -1.12299600 |
| C | 2.79668300  | 4.07649300  | -0.94283900 |
| C | 2.50363900  | 5.22877000  | -0.20882500 |
| C | 0.26546400  | 4.39705300  | 0.17900300  |
| C | 1.23365800  | 5.38204000  | 0.35172100  |
| H | 2.11598700  | 2.17061700  | -1.61406300 |
| H | 0.99683600  | 6.27093100  | 0.92896400  |
| H | 3.79016200  | 3.92046300  | -1.35033300 |
| H | 3.26123100  | 5.99270600  | -0.06289800 |
| H | -0.70987700 | 4.53367800  | 0.63076900  |
| C | -5.61931900 | 0.49793200  | 0.94758400  |
| H | -6.65945800 | 0.24776400  | 0.72201600  |
| H | -5.40235700 | 0.18070000  | 1.97111500  |
| H | -5.50333600 | 1.58379000  | 0.89626400  |
| C | -4.83491700 | -1.71483300 | 0.08027900  |
| H | -4.77119100 | -2.03777400 | 1.12339700  |
| H | -5.82136000 | -1.99692500 | -0.30076200 |
| H | -4.07670600 | -2.25271100 | -0.48612700 |
| C | -6.01423300 | 0.95838100  | -1.89517800 |
| H | -5.92505000 | 1.37492300  | -2.90173600 |
| H | -6.77666300 | 0.17315800  | -1.91927500 |
| H | -6.35114500 | 1.75387100  | -1.22895100 |
| C | -4.13352900 | -0.57228000 | -2.52633300 |
| H | -4.80724700 | -1.42085000 | -2.67488400 |
| H | -4.04775000 | -0.03182100 | -3.47248100 |
| H | -3.13807100 | -0.93504100 | -2.26819000 |
| C | -1.74067900 | 2.21809500  | 0.11299700  |
| H | -1.53239800 | 2.15482000  | 1.18627800  |
| H | -2.17314400 | 3.21550600  | -0.05061600 |
| C | -0.30011400 | 1.17120700  | -1.67602300 |
| O | -0.94637100 | 0.04682300  | -1.61724800 |
| H | 0.45773100  | 1.27857900  | -2.45292900 |
| H | -0.37566900 | -0.39810000 | 5.11793400  |
| H | 1.80525800  | 1.25155500  | 4.61414900  |

|   |             |             |             |
|---|-------------|-------------|-------------|
| C | -1.28619800 | -2.72874700 | -0.41846000 |
| C | -0.16501300 | -2.17068700 | 0.17460600  |
| C | 0.79671400  | -2.92712000 | 0.82862700  |
| C | 0.60263900  | -4.31290000 | 0.90336200  |
| C | -0.52819500 | -4.90271600 | 0.33567100  |
| C | -1.46742200 | -4.11413200 | -0.33049200 |
| H | -2.00164500 | -2.10957800 | -0.94119600 |
| H | 1.68671200  | -2.46694200 | 1.24407900  |
| H | 1.34705400  | -4.92565600 | 1.40447200  |
| H | -0.67146000 | -5.97720900 | 0.40257400  |
| H | -2.33946300 | -4.57043500 | -0.79212100 |
| S | 3.42040300  | -0.46890100 | -0.42280700 |
| O | 4.44009900  | 0.56528500  | -0.64768300 |
| O | 3.37266500  | -1.07160200 | 0.92776300  |
| C | 3.86328400  | -1.87840200 | -1.54314100 |
| F | 5.05677300  | -2.38309100 | -1.20517300 |
| F | 3.91544000  | -1.46507000 | -2.81611500 |
| F | 2.94541400  | -2.85167800 | -1.44745600 |
| O | 2.06427700  | -0.07979200 | -0.95371800 |

**IMes'CuCl<sub>sol</sub>**

|    |             |             |             |
|----|-------------|-------------|-------------|
| C  | 2.92797600  | 0.67944500  | 0.00020100  |
| C  | 2.92803100  | -0.67929900 | 0.00024300  |
| N  | 1.59968800  | -1.07375100 | 0.00008000  |
| N  | 1.59960100  | 1.07378900  | 0.00006700  |
| C  | 0.76355100  | -0.00001600 | 0.00009700  |
| C  | 1.14837700  | 2.46003700  | -0.00019300 |
| H  | 1.51074700  | 2.97561800  | -0.89322100 |
| H  | 0.05850700  | 2.46206500  | 0.00025700  |
| H  | 1.51149500  | 2.97614900  | 0.89222100  |
| C  | 1.14856800  | -2.46003300 | 0.00013400  |
| H  | 0.05869900  | -2.46214000 | -0.00063900 |
| H  | 1.51199200  | -2.97608400 | -0.89219100 |
| H  | 1.51071100  | -2.97562100 | 0.89325000  |
| Cu | -1.15603400 | -0.00003700 | -0.00004200 |
| Cl | -3.29502600 | -0.00001100 | -0.00017200 |
| H  | 3.74206200  | 1.38667400  | 0.00022200  |
| H  | 3.74217400  | -1.38646300 | 0.00032600  |

**NaO'Bu<sub>sol</sub>**

|    |             |             |             |
|----|-------------|-------------|-------------|
| Na | -2.73314100 | -0.00006600 | -0.00228700 |
| O  | -0.75125900 | -0.00403000 | -0.00970500 |
| C  | 0.62156200  | -0.00009400 | -0.00032300 |
| C  | 1.16920000  | 0.26532900  | -1.42418500 |
| H  | 0.79691300  | 1.23071500  | -1.78595000 |
| H  | 2.26597200  | 0.28001700  | -1.46763600 |
| H  | 0.80797400  | -0.51243700 | -2.10692100 |
| C  | 1.15762200  | -1.36777700 | 0.48885300  |



|   |            |             |             |
|---|------------|-------------|-------------|
| H | 2.25393000 | -1.41667200 | 0.51650700  |
| H | 0.77791300 | -1.57074400 | 1.49696500  |
| H | 0.79392200 | -2.16151100 | -0.17403000 |
| C | 1.14897700 | 1.10600400  | 0.94611800  |
| H | 0.77619500 | 2.08144000  | 0.61270100  |
| H | 0.77257400 | 0.93057600  | 1.96059800  |
| H | 2.24507100 | 1.15081600  | 0.98777800  |

**NaCl<sub>sol</sub>**

|    |            |            |             |
|----|------------|------------|-------------|
| Na | 0.00000000 | 0.00000000 | -1.50216700 |
| Cl | 0.00000000 | 0.00000000 | 0.97199000  |

**B<sub>2</sub>pin<sub>2sol</sub>**

|   |             |             |             |
|---|-------------|-------------|-------------|
| B | -0.84986300 | 0.00000100  | 0.00000100  |
| C | -2.99632000 | -0.76816300 | 0.09531000  |
| O | -1.60474100 | -1.13827900 | 0.13359600  |
| C | -2.99632100 | 0.76816200  | -0.09531000 |
| O | -1.60474200 | 1.13827900  | -0.13359600 |
| H | -3.48105300 | -1.29613000 | -0.73135500 |
| H | -3.47125600 | -1.07707300 | 1.03143400  |
| H | -3.48105400 | 1.29612800  | 0.73135500  |
| H | -3.47125700 | 1.07707300  | -1.03143400 |
| B | 0.84986300  | -0.00000100 | -0.00000100 |
| O | 1.60474100  | 1.13828500  | 0.13354400  |
| O | 1.60474100  | -1.13828600 | -0.13354400 |
| C | 2.99632000  | 0.76815500  | 0.09536700  |
| C | 2.99632100  | -0.76815500 | -0.09536700 |
| H | 3.48114700  | 1.29618000  | -0.73120500 |
| H | 3.47116200  | 1.07698700  | 1.03156600  |
| H | 3.47116100  | -1.07698600 | -1.03156700 |
| H | 3.48114700  | -1.29618000 | 0.73120400  |

**BpinO'Bu<sub>sol</sub>**

|   |             |             |             |
|---|-------------|-------------|-------------|
| C | 1.58979400  | 0.80747700  | 0.07189900  |
| C | 1.97795100  | -0.70993800 | -0.06004800 |
| O | 0.16312600  | 0.73202200  | 0.34371300  |
| B | -0.27633700 | -0.46940400 | -0.18252300 |
| O | 0.75389900  | -1.29782300 | -0.57320500 |
| C | 2.26019400  | -1.37043900 | 1.29275300  |
| H | 1.46274000  | -1.15357800 | 2.00886200  |
| H | 2.30908000  | -2.45339500 | 1.15384800  |
| H | 3.20983100  | -1.03154000 | 1.71592100  |
| C | 3.10888200  | -0.99906000 | -1.03906000 |
| H | 4.02912800  | -0.49726200 | -0.72380500 |
| H | 3.30214700  | -2.07480300 | -1.07064300 |
| H | 2.85771200  | -0.66951900 | -2.04821000 |
| C | 2.26593500  | 1.54974900  | 1.21735800  |
| H | 1.92161600  | 2.58747900  | 1.23803700  |

|   |             |             |             |
|---|-------------|-------------|-------------|
| H | 2.03354200  | 1.09495000  | 2.18142900  |
| H | 3.35227100  | 1.55493700  | 1.08412900  |
| C | 1.75354000  | 1.58184800  | -1.23896300 |
| H | 1.28009600  | 1.05201300  | -2.07003900 |
| H | 1.27257100  | 2.55824900  | -1.13728300 |
| H | 2.80758900  | 1.73970500  | -1.48312800 |
| O | -1.56399100 | -0.85796700 | -0.32533800 |
| C | -2.71362800 | -0.03662800 | 0.00460700  |
| C | -3.92233800 | -0.90363000 | -0.34972500 |
| H | -3.90617700 | -1.83193000 | 0.22846500  |
| H | -4.85348900 | -0.37264900 | -0.13129700 |
| H | -3.90761800 | -1.15997000 | -1.41289100 |
| C | -2.69806100 | 0.28298000  | 1.50304400  |
| H | -3.60074500 | 0.83513100  | 1.78218200  |
| H | -2.66945200 | -0.64383000 | 2.08419600  |
| H | -1.82624700 | 0.88739800  | 1.76174000  |
| C | -2.69464700 | 1.23953100  | -0.84268300 |
| H | -2.66302300 | 0.98447100  | -1.90640500 |
| H | -3.59738400 | 1.82966500  | -0.65761500 |
| H | -1.82251300 | 1.85029600  | -0.60132500 |

**R<sub>1(sol)</sub>**

|   |             |             |             |
|---|-------------|-------------|-------------|
| C | -0.40725500 | -1.28305600 | 0.00000200  |
| C | 0.51473200  | -0.22305200 | -0.00012300 |
| C | 0.01295000  | 1.09130800  | -0.00017400 |
| C | -1.35745800 | 1.33095900  | -0.00005600 |
| C | -2.26240000 | 0.26454400  | 0.00010000  |
| C | -1.78102800 | -1.04469900 | 0.00012400  |
| H | -0.03653200 | -2.30482100 | 0.00002300  |
| H | 0.69999500  | 1.93143700  | -0.00034600 |
| H | -1.72399000 | 2.35331300  | -0.00010400 |
| H | -3.33125300 | 0.45520700  | 0.00018200  |
| H | -2.47387000 | -1.88094100 | 0.00023000  |
| C | 1.95266100  | -0.53264200 | -0.00020200 |
| H | 2.18533700  | -1.59699000 | -0.00067500 |
| C | 2.97062200  | 0.33664700  | 0.00028000  |
| H | 2.82476100  | 1.41278400  | 0.00082900  |
| H | 3.99860400  | -0.01004900 | 0.00015300  |

**I<sub>1(sol)</sub>**

|    |             |             |             |
|----|-------------|-------------|-------------|
| Cu | 0.24266100  | -0.02581400 | -0.51797800 |
| B  | -1.70817300 | -0.33969100 | -0.04916300 |
| C  | 1.70914100  | -1.09427700 | -1.80267900 |
| C  | -0.35203300 | 3.08666200  | -1.31540500 |
| O  | -2.29992000 | -1.37327300 | 0.66937800  |
| O  | -2.69095000 | 0.55076700  | -0.49284900 |
| C  | 1.12310500  | 1.65708300  | 0.07886700  |

|   |             |             |             |
|---|-------------|-------------|-------------|
| N | 0.70865000  | 2.88764500  | -0.33409300 |
| N | 2.09091500  | 1.92798400  | 0.99540400  |
| C | 1.40871100  | 3.90224200  | 0.30165000  |
| C | 2.28201200  | 3.29524900  | 1.14636700  |
| C | -3.69457400 | -1.03877100 | 0.91064900  |
| C | -3.99924900 | -0.03561400 | -0.24866000 |
| C | 2.81898800  | 0.91453700  | 1.74760600  |
| H | 1.22083000  | 4.94588400  | 0.10631300  |
| H | 3.00203300  | 3.70547700  | 1.83628900  |
| H | 2.81135600  | 1.16994400  | 2.81008100  |
| H | 3.84879200  | 0.83317100  | 1.39516100  |
| H | 2.32857900  | -0.04512600 | 1.60135300  |
| H | -1.12169600 | 2.32688100  | -1.16302000 |
| H | 0.04224700  | 3.01139900  | -2.33295500 |
| H | -0.78757000 | 4.07755600  | -1.17401500 |
| C | 2.77815400  | -1.46234900 | -0.87336200 |
| C | 2.57678000  | -2.34346400 | 0.21041600  |
| C | 3.61240600  | -2.63726600 | 1.09511700  |
| C | 4.87826900  | -2.07112000 | 0.92408500  |
| C | 4.06298400  | -0.90533800 | -1.03397800 |
| C | 5.09740600  | -1.20695400 | -0.15379800 |
| H | 1.60089900  | -2.79121800 | 0.36721700  |
| H | 6.07830400  | -0.76489000 | -0.30564800 |
| H | 1.98661600  | -0.39282600 | -2.58552500 |
| H | 3.42865000  | -3.31384800 | 1.92506100  |
| H | 5.68287600  | -2.30487700 | 1.61433900  |
| H | 4.23858000  | -0.22387900 | -1.86245700 |
| C | -3.76374600 | -0.39167200 | 2.29856800  |
| H | -4.79381500 | -0.16772100 | 2.59288500  |
| H | -3.33730600 | -1.08213200 | 3.03116400  |
| H | -3.18156900 | 0.53320800  | 2.32478400  |
| C | -4.51934900 | -2.32081100 | 0.88759700  |
| H | -4.22692200 | -2.96231000 | 1.72392600  |
| H | -5.58705400 | -2.09814000 | 0.98834100  |
| H | -4.36541400 | -2.87964900 | -0.03684600 |
| C | -4.98072800 | 1.07830400  | 0.09876700  |
| H | -5.11460200 | 1.73434700  | -0.76643700 |
| H | -5.96011600 | 0.66623100  | 0.36497400  |
| H | -4.62015500 | 1.68493700  | 0.93116700  |
| C | -4.42610800 | -0.72795500 | -1.54778400 |
| H | -5.43602600 | -1.14292200 | -1.47581700 |
| H | -4.41181500 | 0.00424700  | -2.35992300 |
| H | -3.73308400 | -1.53346700 | -1.80388500 |
| C | 0.43570700  | -1.64953600 | -1.82672700 |
| H | -0.22354500 | -1.44150700 | -2.66287800 |
| H | 0.17737100  | -2.52476900 | -1.24167200 |

|    |             |             |             |
|----|-------------|-------------|-------------|
| Cu | 0.47936400  | 0.27894000  | -0.84569100 |
| B  | -1.36623600 | -0.52967000 | -0.40205900 |
| C  | 1.38814000  | -1.37705000 | -1.77546800 |
| C  | -1.03325200 | 3.28498700  | -0.91084400 |
| O  | -1.64251800 | -1.13455900 | 0.81276800  |
| O  | -2.52096800 | -0.08652200 | -1.02627100 |
| C  | 0.95797300  | 1.99510000  | -0.16620000 |
| N  | 0.23454700  | 3.14833800  | -0.20586200 |
| N  | 2.06172700  | 2.31321700  | 0.56306900  |
| C  | 0.87629200  | 4.16736600  | 0.48169900  |
| C  | 2.02593600  | 3.63578800  | 0.97565400  |
| C  | -3.02952900 | -0.84180400 | 1.14391500  |
| C  | -3.66014600 | -0.60473600 | -0.27004100 |
| C  | 3.10778200  | 1.35292400  | 0.90484500  |
| H  | 0.46908000  | 5.16307900  | 0.55220300  |
| H  | 2.80872000  | 4.07542300  | 1.57260500  |
| H  | 2.79726400  | 0.72373400  | 1.74155900  |
| H  | 4.01534500  | 1.89682500  | 1.16965500  |
| H  | 3.30157300  | 0.70853500  | 0.04815700  |
| H  | -1.49899000 | 2.30054200  | -0.98159600 |
| H  | -0.87669300 | 3.68429500  | -1.91700000 |
| H  | -1.68674100 | 3.95993900  | -0.35411100 |
| C  | 2.34638200  | -1.74254300 | -0.75986800 |
| C  | 1.95677500  | -2.06108800 | 0.57166900  |
| C  | 2.90539000  | -2.32810200 | 1.55826400  |
| C  | 4.27211900  | -2.30192300 | 1.27437400  |
| C  | 3.74198200  | -1.74529600 | -1.02932000 |
| C  | 4.67562600  | -2.01251300 | -0.03842500 |
| H  | 0.90336700  | -2.08446300 | 0.83390400  |
| H  | 5.73425200  | -2.00050100 | -0.28779400 |
| H  | 1.74646500  | -1.20742300 | -2.78485800 |
| H  | 2.56648300  | -2.56161200 | 2.56515200  |
| H  | 5.00566300  | -2.51208500 | 2.04649000  |
| H  | 4.07622700  | -1.51649900 | -2.03886300 |
| C  | -3.02066700 | 0.41739600  | 2.01688600  |
| H  | -4.02399200 | 0.67266400  | 2.36971700  |
| H  | -2.38306500 | 0.23800500  | 2.88634400  |
| H  | -2.61235400 | 1.27021600  | 1.46799400  |
| C  | -3.60540800 | -2.02137700 | 1.91707800  |
| H  | -3.09390800 | -2.11590600 | 2.87887800  |
| H  | -4.67226700 | -1.87160700 | 2.11250800  |
| H  | -3.47753700 | -2.95754200 | 1.37147700  |
| C  | -4.78219700 | 0.42378400  | -0.31253400 |
| H  | -5.14586500 | 0.53199200  | -1.33817700 |
| H  | -5.62207400 | 0.10456700  | 0.31313900  |
| H  | -4.44219700 | 1.40141200  | 0.03313000  |
| C  | -4.09046400 | -1.90101700 | -0.96015000 |
| H  | -4.97938600 | -2.33241100 | -0.49099500 |

|   |             |             |             |
|---|-------------|-------------|-------------|
| H | -4.32197700 | -1.68667000 | -2.00671000 |
| H | -3.28841700 | -2.64355800 | -0.93310900 |
| C | -0.05630900 | -1.54801900 | -1.56471000 |
| H | -0.64414400 | -1.49383100 | -2.47942700 |
| H | -0.34980400 | -2.40152400 | -0.94829600 |

### 3<sub>(sol)</sub>

|    |             |             |             |
|----|-------------|-------------|-------------|
| Cu | 0.60516800  | 0.65781800  | -1.20743800 |
| B  | -1.02054900 | -1.86631400 | -0.92711600 |
| C  | 1.24729800  | -1.10657200 | -1.86035900 |
| C  | -1.62214000 | 3.28867800  | -1.46596800 |
| O  | -1.20196400 | -2.51524400 | 0.27684200  |
| O  | -1.92856100 | -0.83455800 | -1.09369900 |
| C  | 0.21112000  | 2.23796200  | -0.15738300 |
| N  | -0.73596500 | 3.20194300  | -0.31226000 |
| N  | 0.80992400  | 2.54754400  | 1.02630800  |
| C  | -0.73235900 | 4.09330400  | 0.74990700  |
| C  | 0.24412600  | 3.67583400  | 1.59880500  |
| C  | -2.06987200 | -1.68572300 | 1.09387000  |
| C  | -2.87247000 | -0.88579600 | 0.00892700  |
| C  | 1.85990900  | 1.74235800  | 1.64693300  |
| H  | -1.40621300 | 4.93326600  | 0.80438500  |
| H  | 0.58025400  | 4.07789500  | 2.54119300  |
| H  | 1.44033000  | 1.11132500  | 2.43449600  |
| H  | 2.61860400  | 2.40087900  | 2.07414000  |
| H  | 2.31665500  | 1.10514500  | 0.88998100  |
| H  | -1.53999800 | 2.35694800  | -2.02476300 |
| H  | -1.33660500 | 4.12714400  | -2.10667600 |
| H  | -2.65361900 | 3.42078700  | -1.13216900 |
| C  | 2.27420400  | -1.29175000 | -0.80373700 |
| C  | 2.05274200  | -2.02098100 | 0.38791600  |
| C  | 3.00956900  | -2.06671900 | 1.40349400  |
| C  | 4.23204300  | -1.40577500 | 1.27518000  |
| C  | 3.53606100  | -0.65407000 | -0.92279000 |
| C  | 4.48787400  | -0.70484100 | 0.08910900  |
| H  | 1.11187300  | -2.53850000 | 0.52954100  |
| H  | 5.43997600  | -0.19697500 | -0.04697500 |
| H  | 1.74055300  | -0.98615700 | -2.83052800 |
| H  | 2.79359800  | -2.63289500 | 2.30710400  |
| H  | 4.97314200  | -1.44470100 | 2.06792500  |
| H  | 3.74785600  | -0.09288400 | -1.83088500 |
| C  | -1.15300200 | -0.79327900 | 1.93889100  |
| H  | -1.72455200 | -0.17279600 | 2.63512100  |
| H  | -0.47309600 | -1.42733000 | 2.51302500  |
| H  | -0.54828000 | -0.14226200 | 1.30196700  |
| C  | -2.91072600 | -2.58537700 | 1.98996200  |
| H  | -2.26146100 | -3.10931800 | 2.69674800  |
| H  | -3.63138600 | -1.99429300 | 2.56416000  |

|   |             |             |             |
|---|-------------|-------------|-------------|
| H | -3.45395300 | -3.33297200 | 1.41001500  |
| C | -3.23940200 | 0.53865100  | 0.40813600  |
| H | -3.78655600 | 1.01928800  | -0.40791400 |
| H | -3.88379200 | 0.53769300  | 1.29300200  |
| H | -2.35007400 | 1.13229200  | 0.62026100  |
| C | -4.10802200 | -1.63440800 | -0.49901100 |
| H | -4.90054100 | -1.66225200 | 0.25417700  |
| H | -4.49170900 | -1.12354700 | -1.38608200 |
| H | -3.85609600 | -2.66058500 | -0.77935700 |
| C | 0.12083100  | -2.17257900 | -1.95196800 |
| H | -0.30476700 | -2.11733400 | -2.96143600 |
| H | 0.51250500  | -3.19451000 | -1.82211800 |

**6<sub>a(sol)</sub>**

|   |             |             |             |
|---|-------------|-------------|-------------|
| P | -2.03782400 | 0.08687000  | -0.41027700 |
| C | -1.95465100 | 0.11220900  | -2.25135600 |
| H | -1.77443600 | -0.93498800 | -2.51583300 |
| H | -2.93868600 | 0.38589300  | -2.64805000 |
| C | -0.86736100 | 1.00127300  | -2.87847300 |
| H | -1.04956500 | 1.00748900  | -3.96184600 |
| H | -0.97046600 | 2.03785100  | -2.55054200 |
| C | 0.58594800  | 0.53967900  | -2.66344700 |
| H | 1.25656700  | 1.09339100  | -3.32725900 |
| H | 0.68087900  | -0.52709000 | -2.88964200 |
| P | 1.19042000  | 0.76951400  | -0.93211200 |
| C | -3.47852800 | -0.98564400 | -0.05493300 |
| C | -4.78306500 | -0.48676500 | -0.18325600 |
| C | -3.28632800 | -2.31892400 | 0.32678300  |
| C | -5.87646100 | -1.31683500 | 0.05762600  |
| H | -4.94369400 | 0.55048500  | -0.46048100 |
| C | -4.38510000 | -3.14573100 | 0.56943000  |
| H | -2.27762100 | -2.72630200 | 0.39312400  |
| C | -5.68157100 | -2.64725500 | 0.43386800  |
| H | -6.88396600 | -0.91812000 | -0.04300200 |
| H | -4.22421200 | -4.17871800 | 0.85525300  |
| H | -6.53461200 | -3.28528700 | 0.62413600  |
| C | -2.59220300 | 1.74135200  | 0.13055300  |
| C | -2.99991600 | 2.74106900  | -0.75688200 |
| C | -2.59995400 | 2.01025900  | 1.50777400  |
| C | -3.37254400 | 4.00146900  | -0.28370700 |
| H | -3.02366000 | 2.54946800  | -1.82340300 |
| C | -2.98848900 | 3.26067700  | 1.98557700  |
| H | -2.28114100 | 1.24661800  | 2.21142900  |
| C | -3.36608500 | 4.26747600  | 1.08454900  |
| H | -3.66862900 | 4.77286800  | -0.98782400 |
| H | -2.98818500 | 3.45947800  | 3.05294300  |
| H | -3.65460100 | 5.24177600  | 1.44995200  |
| C | 2.97740600  | 0.41395400  | -0.97659300 |

|    |             |             |             |
|----|-------------|-------------|-------------|
| C  | 3.42856400  | -0.78623000 | -1.54005900 |
| C  | 3.89136200  | 1.27486900  | -0.34549600 |
| C  | 4.78130100  | -1.11660400 | -1.48385000 |
| H  | 2.72001700  | -1.48593900 | -1.97428700 |
| C  | 5.24240500  | 0.93360000  | -0.29223300 |
| H  | 3.54236800  | 2.19534500  | 0.10740000  |
| C  | 5.69081600  | -0.25878800 | -0.86144600 |
| H  | 5.12173300  | -2.05128200 | -1.91898700 |
| H  | 5.94330600  | 1.60069700  | 0.20054700  |
| H  | 6.74337400  | -0.52193300 | -0.81524200 |
| C  | 1.06047500  | 2.57849800  | -0.67275000 |
| C  | 1.52998500  | 3.49841500  | -1.62663900 |
| C  | 0.45356900  | 3.04940000  | 0.49379100  |
| C  | 1.37211700  | 4.87163700  | -1.41204300 |
| H  | 2.01738600  | 3.15321200  | -2.53319600 |
| C  | 0.30038000  | 4.41758800  | 0.70755700  |
| H  | 0.09637200  | 2.33641400  | 1.22464900  |
| C  | 0.75302100  | 5.33196600  | -0.24342000 |
| H  | 1.72936400  | 5.57671300  | -2.15028100 |
| H  | -0.19031600 | 4.76947300  | 1.61125000  |
| H  | 0.63119600  | 6.39738700  | -0.08419100 |
| Pd | -0.01895100 | -0.55088800 | 0.62755400  |
| C  | 2.61958300  | -1.77036500 | 1.63172000  |
| C  | 1.72459600  | -0.73082400 | 1.85914800  |
| C  | 1.95879600  | 0.25521900  | 2.81962300  |
| C  | 3.25598400  | 0.37945400  | 3.33507600  |
| C  | 4.23792400  | -0.54084700 | 2.95045200  |
| C  | 3.91320600  | -1.64790000 | 2.16214400  |
| H  | 2.35559300  | -2.57021700 | 0.94460900  |
| H  | 3.50757400  | 1.19917400  | 4.00358100  |
| H  | 5.25647300  | -0.41349200 | 3.29842000  |
| H  | 4.68089500  | -2.37979600 | 1.91216500  |
| I  | 0.26575800  | -3.07865400 | -1.18714700 |
| H  | 1.18991300  | 0.99015200  | 3.05450000  |
| C  | -0.60254600 | -1.52607000 | 2.21497200  |
| O  | -0.71602800 | -2.14273500 | 3.19246500  |

**TS6<sub>a(sol)</sub>**

|   |             |             |             |
|---|-------------|-------------|-------------|
| P | -2.03782400 | 0.08047000  | -0.38467700 |
| C | -1.94185100 | 0.10580900  | -2.23215600 |
| H | -1.76163600 | -0.94138800 | -2.49663300 |
| H | -2.93228600 | 0.37309300  | -2.61605000 |
| C | -0.86736100 | 1.00127300  | -2.87847300 |
| H | -1.06876500 | 1.00748900  | -3.95544600 |
| H | -0.97686600 | 2.03785100  | -2.54414200 |
| C | 0.59234800  | 0.55247900  | -2.68904700 |
| H | 1.24376700  | 1.10619100  | -3.37205900 |
| H | 0.69367900  | -0.51429000 | -2.90884200 |

|    |             |             |             |
|----|-------------|-------------|-------------|
| P  | 1.19042000  | 0.78231400  | -0.95771200 |
| C  | -3.48492800 | -0.98564400 | -0.04853300 |
| C  | -4.78946500 | -0.48676500 | -0.18325600 |
| C  | -3.28632800 | -2.31892400 | 0.33318300  |
| C  | -5.88286100 | -1.31683500 | 0.05762600  |
| H  | -4.95009400 | 0.55048500  | -0.46048100 |
| C  | -4.38510000 | -3.14573100 | 0.56943000  |
| H  | -2.27762100 | -2.70710200 | 0.42512400  |
| C  | -5.68157100 | -2.64725500 | 0.43386800  |
| H  | -6.89036600 | -0.92452000 | -0.04300200 |
| H  | -4.22421200 | -4.17871800 | 0.86165300  |
| H  | -6.53461200 | -3.29168700 | 0.62413600  |
| C  | -2.59860300 | 1.74135200  | 0.13695300  |
| C  | -2.99991600 | 2.74106900  | -0.75688200 |
| C  | -2.59995400 | 2.01665900  | 1.51417400  |
| C  | -3.37254400 | 4.00146900  | -0.28370700 |
| H  | -3.02366000 | 2.54946800  | -1.82340300 |
| C  | -2.98848900 | 3.26707700  | 1.98557700  |
| H  | -2.28114100 | 1.24661800  | 2.21142900  |
| C  | -3.36608500 | 4.26747600  | 1.08454900  |
| H  | -3.66862900 | 4.77286800  | -0.98782400 |
| H  | -2.98818500 | 3.46587800  | 3.05294300  |
| H  | -3.65460100 | 5.24817600  | 1.44995200  |
| C  | 2.97740600  | 0.42035400  | -0.98299300 |
| C  | 3.42856400  | -0.78623000 | -1.54005900 |
| C  | 3.89136200  | 1.27486900  | -0.35189600 |
| C  | 4.78130100  | -1.11660400 | -1.48385000 |
| H  | 2.72001700  | -1.47953900 | -1.98068700 |
| C  | 5.24240500  | 0.93360000  | -0.29223300 |
| H  | 3.54876800  | 2.20174500  | 0.09460000  |
| C  | 5.69081600  | -0.25878800 | -0.86144600 |
| H  | 5.12173300  | -2.05128200 | -1.91898700 |
| H  | 5.94330600  | 1.60069700  | 0.20054700  |
| H  | 6.74337400  | -0.52193300 | -0.81524200 |
| C  | 1.06687500  | 2.58489800  | -0.68555000 |
| C  | 1.52998500  | 3.51121500  | -1.63303900 |
| C  | 0.45996900  | 3.04940000  | 0.48739100  |
| C  | 1.37211700  | 4.87803700  | -1.41204300 |
| H  | 2.01738600  | 3.16601200  | -2.53959600 |
| C  | 0.30038000  | 4.41758800  | 0.70755700  |
| H  | 0.09637200  | 2.33001400  | 1.21184900  |
| C  | 0.75302100  | 5.33196600  | -0.24342000 |
| H  | 1.72936400  | 5.58951300  | -2.15028100 |
| H  | -0.19031600 | 4.76307300  | 1.61125000  |
| H  | 0.62479600  | 6.39738700  | -0.07779100 |
| Pd | -0.01255100 | -0.54448800 | 0.60195400  |
| C  | 2.52998300  | -1.82796500 | 1.70852000  |
| C  | 1.55179600  | -0.90362400 | 2.08954800  |



|   |             |             |             |
|---|-------------|-------------|-------------|
| C | 1.88199600  | 0.19761900  | 2.89002300  |
| C | 3.20478400  | 0.38585400  | 3.29027600  |
| C | 4.18672400  | -0.52804700 | 2.89925200  |
| C | 3.84920600  | -1.63510000 | 2.11734400  |
| H | 2.25959300  | -2.65981700 | 1.06620900  |
| H | 3.46917400  | 1.24397400  | 3.90118100  |
| H | 5.21807300  | -0.37509200 | 3.20242000  |
| H | 4.61689500  | -2.33499600 | 1.80336500  |
| I | 0.26575800  | -3.07865400 | -1.18714700 |
| H | 1.11311300  | 0.90055200  | 3.19530000  |
| C | -0.25694600 | -1.47487000 | 2.24697200  |
| O | -0.65842800 | -2.09793500 | 3.14766500  |

$7_{a(sol)}$

|   |             |             |             |
|---|-------------|-------------|-------------|
| P | 1.24398500  | 0.84131900  | 1.17131500  |
| C | 0.57833600  | 1.60839600  | 2.72440000  |
| H | 0.61122200  | 0.80560300  | 3.46911300  |
| H | 1.29999300  | 2.36413200  | 3.05183700  |
| C | -0.83138300 | 2.21892000  | 2.67696900  |
| H | -0.99506900 | 2.71326200  | 3.64141300  |
| H | -0.87773000 | 3.00734700  | 1.92075000  |
| C | -1.98924700 | 1.23788600  | 2.45143900  |
| H | -2.93990500 | 1.73272200  | 2.67290100  |
| H | -1.91110600 | 0.38428000  | 3.13394600  |
| P | -2.07031900 | 0.51412200  | 0.74061600  |
| C | 2.95033700  | 0.42157300  | 1.68442300  |
| C | 4.07577500  | 1.03490500  | 1.12107700  |
| C | 3.12225600  | -0.58299000 | 2.64954100  |
| C | 5.35645900  | 0.64898200  | 1.51863800  |
| H | 3.95428400  | 1.80237000  | 0.36558500  |
| C | 4.40231300  | -0.96005800 | 3.04879700  |
| H | 2.25926700  | -1.09539100 | 3.06143300  |
| C | 5.52264600  | -0.34667500 | 2.48147000  |
| H | 6.22328600  | 1.12518200  | 1.07077400  |
| H | 4.52512100  | -1.74217000 | 3.79138000  |
| H | 6.51993900  | -0.64869300 | 2.78630600  |
| C | 1.44592600  | 2.20550100  | -0.02849200 |
| C | 1.29877100  | 3.55637400  | 0.31066300  |
| C | 1.76599600  | 1.86359800  | -1.35185500 |
| C | 1.44272600  | 4.54539700  | -0.66360600 |
| H | 1.07427600  | 3.84971300  | 1.32916300  |
| C | 1.93761300  | 2.85405900  | -2.31478800 |
| H | 1.88212100  | 0.82114700  | -1.62379000 |
| C | 1.76312100  | 4.19768700  | -1.97575000 |
| H | 1.30897100  | 5.58809700  | -0.39297200 |
| H | 2.19399100  | 2.57394100  | -3.33193500 |
| H | 1.87746200  | 4.96990400  | -2.73020600 |
| C | -3.70782400 | -0.29536600 | 0.77545600  |

|    |             |             |             |
|----|-------------|-------------|-------------|
| C  | -3.81859500 | -1.50166700 | 1.48351500  |
| C  | -4.83446200 | 0.23348100  | 0.13526400  |
| C  | -5.04710600 | -2.15124000 | 1.57567500  |
| H  | -2.93804100 | -1.94328700 | 1.94016800  |
| C  | -6.06110700 | -0.42812400 | 0.21829500  |
| H  | -4.75587700 | 1.15513300  | -0.43086100 |
| C  | -6.17114900 | -1.61555500 | 0.94210700  |
| H  | -5.12267800 | -3.08480700 | 2.12457300  |
| H  | -6.92939200 | -0.01466000 | -0.28608700 |
| H  | -7.12601800 | -2.12877100 | 1.00373100  |
| C  | -2.23977100 | 1.97336400  | -0.34392800 |
| C  | -2.94393600 | 3.12924500  | 0.02746400  |
| C  | -1.58493400 | 1.93914300  | -1.58254500 |
| C  | -2.98303800 | 4.23281000  | -0.82390100 |
| H  | -3.46247800 | 3.17136300  | 0.98019900  |
| C  | -1.62850400 | 3.04169500  | -2.43462000 |
| H  | -1.03076700 | 1.04897000  | -1.86109800 |
| C  | -2.32316900 | 4.19029900  | -2.05450800 |
| H  | -3.52647900 | 5.12482000  | -0.52728200 |
| H  | -1.10660700 | 3.00817400  | -3.38507100 |
| H  | -2.34915900 | 5.05287400  | -2.71350800 |
| Pd | -0.09880000 | -0.84173900 | 0.28293600  |
| C  | 2.10975300  | -1.51752200 | -2.22580000 |
| C  | 2.50251300  | -1.88697500 | -0.93331300 |
| C  | 3.86470600  | -2.00653900 | -0.62398400 |
| C  | 4.82546200  | -1.73362500 | -1.59525000 |
| C  | 4.43212800  | -1.37289800 | -2.88629600 |
| C  | 3.07387300  | -1.27822700 | -3.20364000 |
| H  | 1.05110900  | -1.43811900 | -2.45018700 |
| H  | 5.88007900  | -1.80016200 | -1.34518400 |
| H  | 5.18190400  | -1.16649100 | -3.64443100 |
| H  | 2.76731100  | -1.01270500 | -4.21096100 |
| I  | -1.41897800 | -2.69921600 | -1.20491200 |
| H  | 4.15202000  | -2.28160400 | 0.38451800  |
| C  | 1.51082500  | -2.07124400 | 0.16947400  |
| O  | 1.69384000  | -2.85037800 | 1.08221800  |

**COM<sub>R3-Pd(dppp)(sol)</sub>**

|   |             |            |             |
|---|-------------|------------|-------------|
| P | -2.56929400 | 0.75001300 | -0.11527000 |
| C | -2.71283800 | 2.60324900 | -0.07573600 |
| H | -2.95757700 | 2.89408000 | -1.10395800 |
| H | -3.57254300 | 2.89564400 | 0.53793600  |
| C | -1.45260000 | 3.35225300 | 0.39593900  |
| H | -1.74184100 | 4.39827800 | 0.55051800  |
| H | -1.14202300 | 2.98423400 | 1.37972000  |
| C | -0.24600000 | 3.34981100 | -0.56376500 |
| H | 0.39525300  | 4.20008800 | -0.31015300 |
| H | -0.58216300 | 3.48474900 | -1.59816300 |

|    |             |             |             |
|----|-------------|-------------|-------------|
| P  | 0.78526400  | 1.79325400  | -0.51358800 |
| Pd | -0.58302000 | -0.02808400 | -1.07014700 |
| C  | -4.26147600 | 0.26785300  | -0.65000400 |
| C  | -5.35130200 | 0.20256300  | 0.22941300  |
| C  | -4.45480800 | -0.05312900 | -2.00130900 |
| C  | -6.61148700 | -0.17213000 | -0.23714600 |
| H  | -5.21034100 | 0.43404800  | 1.28068500  |
| C  | -5.71730500 | -0.41755300 | -2.47003900 |
| H  | -3.60596200 | -0.02367100 | -2.67875600 |
| C  | -6.79728900 | -0.48005000 | -1.58698600 |
| H  | -7.44866000 | -0.22574500 | 0.45274400  |
| H  | -5.85589700 | -0.66234000 | -3.51899600 |
| H  | -7.77843400 | -0.77413000 | -1.94748000 |
| C  | -2.52237400 | 0.25766600  | 1.65390000  |
| C  | -2.82187500 | 1.11478300  | 2.72081500  |
| C  | -2.04782600 | -1.03625000 | 1.93486700  |
| C  | -2.63475400 | 0.69640700  | 4.04061400  |
| H  | -3.18529600 | 2.11923500  | 2.53224100  |
| C  | -1.87230700 | -1.45637000 | 3.25131600  |
| H  | -1.79331800 | -1.70005200 | 1.11297700  |
| C  | -2.15705300 | -0.58670600 | 4.30845000  |
| H  | -2.85719100 | 1.37641800  | 4.85749100  |
| H  | -1.49810200 | -2.45557400 | 3.45280300  |
| H  | -2.00492300 | -0.90799200 | 5.33439900  |
| C  | 2.19753800  | 2.18902000  | -1.62455400 |
| C  | 2.52967200  | 3.48092000  | -2.05771000 |
| C  | 2.97641300  | 1.10773900  | -2.06868100 |
| C  | 3.61972000  | 3.68606800  | -2.90659600 |
| H  | 1.94418400  | 4.33571800  | -1.73749500 |
| C  | 4.07353000  | 1.31422300  | -2.90216800 |
| H  | 2.71480700  | 0.10343900  | -1.75429700 |
| C  | 4.39658300  | 2.60571800  | -3.32604200 |
| H  | 3.86212600  | 4.69193900  | -3.23692100 |
| H  | 4.67023300  | 0.46709100  | -3.22689800 |
| H  | 5.24523400  | 2.76770400  | -3.98374000 |
| C  | 1.51810600  | 1.95401200  | 1.17017400  |
| C  | 2.68496200  | 2.68776200  | 1.42527100  |
| C  | 0.87064900  | 1.31448400  | 2.23757200  |
| C  | 3.19083100  | 2.78001300  | 2.72231600  |
| H  | 3.20771800  | 3.17524300  | 0.60870800  |
| C  | 1.37030000  | 1.41716700  | 3.53585100  |
| H  | -0.01411500 | 0.71998700  | 2.04894400  |
| C  | 2.53459100  | 2.14740800  | 3.78085100  |
| H  | 4.10097200  | 3.34370000  | 2.90585900  |
| H  | 0.85163800  | 0.91602700  | 4.34757600  |
| H  | 2.93298600  | 2.21842200  | 4.78859700  |
| C  | 0.89977700  | -2.76008500 | -1.28981700 |
| C  | 0.38519800  | -1.77877400 | -2.17990200 |

|   |             |             |             |
|---|-------------|-------------|-------------|
| C | 0.12074300  | -3.70038500 | -0.66302600 |
| C | -1.02796800 | -1.79049300 | -2.39934300 |
| H | 1.06660900  | -1.28367200 | -2.86188100 |
| C | -1.27915300 | -3.69063300 | -0.90122100 |
| H | 0.56191700  | -4.44416500 | -0.01508600 |
| C | -1.83935200 | -2.76800900 | -1.75460700 |
| H | -1.43505200 | -1.24601500 | -3.24628200 |
| H | -1.89836800 | -4.43416100 | -0.40999300 |
| H | -2.90760500 | -2.76813000 | -1.94638100 |
| S | 3.15599000  | -3.04994500 | 0.16683400  |
| O | 2.65149600  | -4.22296400 | 0.86580200  |
| O | 4.54899500  | -2.92444900 | -0.21960000 |
| C | 2.72604600  | -1.57087300 | 1.22495700  |
| F | 3.29729800  | -1.73144400 | 2.41609300  |
| F | 1.40508300  | -1.49149600 | 1.36860200  |
| F | 3.19845800  | -0.47373900 | 0.64456400  |
| O | 2.32330700  | -2.72688500 | -1.18741600 |

**TS6<sub>b(sol)</sub>**

|    |             |             |             |
|----|-------------|-------------|-------------|
| P  | -1.65239900 | 1.23309000  | -0.77212400 |
| C  | -1.13605100 | 2.42401200  | -2.10363500 |
| H  | -1.23774200 | 1.87719600  | -3.04704200 |
| H  | -1.86577500 | 3.23945500  | -2.14350200 |
| C  | 0.28826100  | 3.00107700  | -1.98765800 |
| H  | 0.32893300  | 3.88217400  | -2.63831300 |
| H  | 0.46891800  | 3.37357400  | -0.97357500 |
| C  | 1.44362000  | 2.07308100  | -2.40629600 |
| H  | 2.33133100  | 2.68823000  | -2.58719700 |
| H  | 1.20155500  | 1.55846200  | -3.34316600 |
| P  | 1.85719400  | 0.76922400  | -1.14535700 |
| Pd | -0.09312700 | -0.47685500 | -0.52016200 |
| C  | -3.38175900 | 0.86777400  | -1.24115800 |
| C  | -4.46933000 | 1.11522600  | -0.39183900 |
| C  | -3.60731000 | 0.21977700  | -2.46679800 |
| C  | -5.75490800 | 0.72252700  | -0.76236500 |
| H  | -4.30988800 | 1.61163200  | 0.55902400  |
| C  | -4.89444000 | -0.15549700 | -2.84163300 |
| H  | -2.77017400 | -0.01216100 | -3.11893000 |
| C  | -5.97129700 | 0.08592500  | -1.98554100 |
| H  | -6.58932200 | 0.91624400  | -0.09464900 |
| H  | -5.05546100 | -0.65434300 | -3.79271100 |
| H  | -6.97341100 | -0.21882300 | -2.27181600 |
| C  | -1.79103300 | 2.26705000  | 0.73528400  |
| C  | -1.72915000 | 3.66691700  | 0.73272500  |
| C  | -1.87544400 | 1.59604100  | 1.96721700  |
| C  | -1.73000900 | 4.37804600  | 1.93430700  |
| H  | -1.67121300 | 4.21377700  | -0.20148400 |
| C  | -1.89306300 | 2.30655800  | 3.16534400  |

|   |             |             |             |
|---|-------------|-------------|-------------|
| H | -1.91825200 | 0.51282700  | 1.97619100  |
| C | -1.80915500 | 3.70171400  | 3.15187700  |
| H | -1.66787200 | 5.46192700  | 1.91678300  |
| H | -1.95997600 | 1.77247500  | 4.10832000  |
| H | -1.80690600 | 4.25694800  | 4.08482800  |
| C | 3.32832500  | -0.07292000 | -1.84768900 |
| C | 4.13277700  | 0.46008100  | -2.86581500 |
| C | 3.64098500  | -1.34078800 | -1.32904300 |
| C | 5.23227600  | -0.25416300 | -3.34554900 |
| H | 3.90833500  | 1.43166600  | -3.29276800 |
| C | 4.74535400  | -2.04718200 | -1.80158500 |
| H | 3.01733500  | -1.77438600 | -0.55450900 |
| C | 5.54318600  | -1.50571000 | -2.81228400 |
| H | 5.84515500  | 0.16878200  | -4.13614100 |
| H | 4.97470500  | -3.02404700 | -1.38715200 |
| H | 6.39855300  | -2.05958300 | -3.18713500 |
| C | 2.53835600  | 1.80879600  | 0.20993900  |
| C | 3.79989300  | 2.41632600  | 0.13700600  |
| C | 1.73211200  | 2.04057800  | 1.33343100  |
| C | 4.23772900  | 3.25189600  | 1.16412000  |
| H | 4.44333300  | 2.22807100  | -0.71715400 |
| C | 2.16436900  | 2.88834400  | 2.35365500  |
| H | 0.76650800  | 1.55454200  | 1.40488800  |
| C | 3.41834100  | 3.49511600  | 2.27021100  |
| H | 5.21859400  | 3.71418100  | 1.10250300  |
| H | 1.51953700  | 3.06854600  | 3.20842700  |
| H | 3.76116500  | 4.15031500  | 3.06552400  |
| C | -1.44745000 | -2.15772000 | -0.01977900 |
| C | -1.93481800 | -2.69758300 | -1.22193600 |
| C | -2.27285800 | -2.02741400 | 1.10911400  |
| C | -3.30717400 | -2.89439200 | -1.34981300 |
| H | -1.25048600 | -2.90722300 | -2.03672000 |
| C | -3.63904900 | -2.23226100 | 0.94547800  |
| H | -1.86477100 | -1.72318300 | 2.06238500  |
| C | -4.17097300 | -2.65786200 | -0.27698600 |
| H | -3.70046100 | -3.24821900 | -2.29827600 |
| H | -4.29568900 | -2.06289700 | 1.79424800  |
| H | -5.23816100 | -2.81195300 | -0.38706500 |
| S | 0.73874700  | -3.30847900 | 1.51472800  |
| O | -0.27213700 | -3.91224100 | 2.37369300  |
| O | 1.95008800  | -4.03348100 | 1.14626700  |
| C | 1.34240100  | -1.80059100 | 2.43709300  |
| F | 1.83379400  | -2.19575700 | 3.61071500  |
| F | 0.33835900  | -0.93767900 | 2.65619000  |
| F | 2.30199000  | -1.18289100 | 1.74404100  |
| O | 0.13204800  | -2.69898700 | 0.19820200  |

|    |             |             |             |
|----|-------------|-------------|-------------|
| P  | -1.81372300 | 1.00920000  | -0.84996900 |
| C  | -1.39219300 | 2.18595800  | -2.21863300 |
| H  | -1.45755300 | 1.62973200  | -3.15827100 |
| H  | -2.19363400 | 2.93044900  | -2.23777000 |
| C  | -0.02564900 | 2.87863200  | -2.12104500 |
| H  | -0.05027700 | 3.74751100  | -2.78683600 |
| H  | 0.13436300  | 3.28017000  | -1.11372200 |
| C  | 1.15226400  | 1.98827100  | -2.54958800 |
| H  | 2.01915300  | 2.60159600  | -2.81295100 |
| H  | 0.86675000  | 1.41785100  | -3.43938600 |
| P  | 1.67009400  | 0.78689500  | -1.23678800 |
| Pd | -0.20033400 | -0.47351200 | -0.31537200 |
| C  | -3.39683900 | 0.29598400  | -1.41386700 |
| C  | -4.47153600 | 0.14988700  | -0.52764100 |
| C  | -3.49072400 | -0.24088100 | -2.70542800 |
| C  | -5.62459600 | -0.51945700 | -0.93184200 |
| H  | -4.39679400 | 0.53075200  | 0.48372400  |
| C  | -4.64925300 | -0.90285800 | -3.10805700 |
| H  | -2.65509300 | -0.17162500 | -3.39485100 |
| C  | -5.71745100 | -1.04538500 | -2.22117600 |
| H  | -6.44672700 | -0.63899900 | -0.23344600 |
| H  | -4.71202600 | -1.31605600 | -4.10994400 |
| H  | -6.61498800 | -1.57127400 | -2.53142100 |
| C  | -2.24420700 | 2.10880400  | 0.54239900  |
| C  | -3.20288500 | 3.12149000  | 0.38221500  |
| C  | -1.61475200 | 1.94984200  | 1.78275000  |
| C  | -3.51250500 | 3.96747200  | 1.44488200  |
| H  | -3.72155700 | 3.23877300  | -0.56416300 |
| C  | -1.92343300 | 2.80007000  | 2.84534500  |
| H  | -0.88602700 | 1.15921500  | 1.91250700  |
| C  | -2.87050500 | 3.81007600  | 2.67655000  |
| H  | -4.25615000 | 4.74723900  | 1.31387900  |
| H  | -1.42806800 | 2.66693700  | 3.80178900  |
| H  | -3.11382800 | 4.47110900  | 3.50247700  |
| C  | 2.98800300  | -0.20860000 | -2.01607000 |
| C  | 3.24097300  | -0.17688500 | -3.39497300 |
| C  | 3.75069900  | -1.06128800 | -1.19965600 |
| C  | 4.23810500  | -0.98285700 | -3.94753600 |
| H  | 2.67379200  | 0.47507200  | -4.04908300 |
| C  | 4.74467200  | -1.86132900 | -1.75628500 |
| H  | 3.56697900  | -1.10701400 | -0.13574000 |
| C  | 4.99049600  | -1.82644700 | -3.13081500 |
| H  | 4.42514700  | -0.94701800 | -5.01652000 |
| H  | 5.31706800  | -2.52063600 | -1.11193900 |
| H  | 5.76294200  | -2.45541700 | -3.56267300 |
| C  | 2.55911200  | 1.88650600  | -0.07401900 |
| C  | 3.90333100  | 2.23425900  | -0.26837600 |
| C  | 1.85818900  | 2.43693400  | 1.00634100  |

|   |             |             |             |
|---|-------------|-------------|-------------|
| C | 4.53082800  | 3.11928200  | 0.60745600  |
| H | 4.45972500  | 1.80447700  | -1.09458900 |
| C | 2.48409500  | 3.33011600  | 1.87493600  |
| H | 0.82587100  | 2.15930600  | 1.17338700  |
| C | 3.82313100  | 3.66989900  | 1.67878700  |
| H | 5.57438300  | 3.37730300  | 0.45504400  |
| H | 1.92771000  | 3.74898600  | 2.70794500  |
| H | 4.31644000  | 4.35633300  | 2.36006100  |
| C | -1.76272000 | -1.59900800 | 0.37431700  |
| C | -2.30536300 | -2.54652500 | -0.49890200 |
| C | -2.26451300 | -1.49696700 | 1.67301600  |
| C | -3.34421100 | -3.37983400 | -0.08093100 |
| H | -1.93645500 | -2.62636200 | -1.51745400 |
| C | -3.30868000 | -2.32921400 | 2.09035700  |
| H | -1.84555600 | -0.78656900 | 2.37633500  |
| C | -3.85473400 | -3.26629600 | 1.21401200  |
| H | -3.75954800 | -4.11030800 | -0.76986300 |
| H | -3.68982900 | -2.24369400 | 3.10463400  |
| H | -4.67004400 | -3.90699600 | 1.53746900  |
| S | 1.60110600  | -2.66994000 | 1.54851400  |
| O | 0.50737700  | -3.35983600 | 2.23919400  |
| O | 2.92153400  | -3.31535100 | 1.51582700  |
| C | 1.89689700  | -1.14796400 | 2.57629200  |
| F | 2.25421700  | -1.48661700 | 3.81831000  |
| F | 0.78543500  | -0.38099400 | 2.65950900  |
| F | 2.87272800  | -0.39081900 | 2.04446700  |
| O | 1.24611600  | -2.08805600 | 0.19674800  |
